# Supplementary material for: High-throughput screening of clinically approved drugs that prime nonviral gene delivery to human Mesenchymal stem cells
Source: J Biol Eng. 2020 May 19;14:16. doi: 10.1186/s13036-020-00238-1 (PMC7238544; doi:10.1186/s13036-020-00238-1)
Supplement: Supplementary file 1 — Additional file 1: Supplemental Data. NCC Screen Fold Changes. Excel spreadsheet containing all fold changes for Hoechst-count, viability, transfection efficiency, EGFP cell-count, transgene production (imaging), and luciferase activity for all compounds in both donors at all four concentrations. Compounds that were removed by toxicity filters at each concentration are also listed. [file 13036_2020_238_MOESM1_ESM.xlsx]

## Sheet: Key
	Key
	Positive priming compounds with significant transfection efficiency FC relative to the VC
	Negative priming compounds with significant transfection efficiency FC relative to the VC
	Positive priming compounds with significant EGFP cell-count FC relative to the VC
	Negative priming compounds with significant EGFP cell-count FC relative to the VC
	Positive priming compounds with both significant transfection efficiency and EGFP cell-count FC relative to the VC
	Negative priming compounds with both significant transfection efficiency and EGFP cell-count FC relative to the VC
	Positive priming compounds that hit in a single donor
	Negative priming compounds that hit in a single donor
	Positive priming compounds that hit at the same concentration in both donors
	Negative priming compounds that hit at the same concentration in both donors

## Sheet: 100 uM
		Hoechst Ratio								Viability Ratio								TE FC								GFP FC								Transgene FC								RLU/mg FC
		Donor 1 hAMSCs				Donor 2 hAMSCs				Donor 1 hAMSCs				Donor 2 hAMSCs				Donor 1 hAMSCs				Donor 2 hAMSCs				Donor 1 hAMSCs				Donor 2 hAMSCs				Donor 1 hAMSCs				Donor 2 hAMSCs				Donor 1 hAMSCs				Donor 2 hAMSCs
Drug	Plate	Well 1	Well 2	Well 3	Average	Well 1	Well 2	Well 3	Average	Well 1	Well 2	Well 3	Average	Well 1	Well 2	Well 3	Average	Well 1	Well 2	Well 3	Average	Well 1	Well 2	Well 3	Average	Well 1	Well 2	Well 3	Average	Well 1	Well 2	Well 3	Average	Well 1	Well 2	Well 3	Average	Well 1	Well 2	Well 3	Average	Well 1	Well 2	Well 3	Average	Well 1	Well 2	Well 3	Average
Primaquine diphosphate	1	0.064	0.086	0.253	0.134333	0.186	0.178	0.214	0.192667	0.6615	0.715799	0.61734	0.66488	0.984	0.881	0.968	0.944333	0.677874	0.998637	0.511586	0.729365	0.674679	1.80578	0.670255	1.05024	0.0444444	0.0888889	0.133333	0.0888889	0.12963	0.333333	0.148148	0.203704	0.896259	0.450998	0.552369	0.633209	0.499624	0.422618	0.546558	0.4896	0.00839178	0.006128	0.00608652	0.00686877	0.000531104	0.000590691	0.00174097	0.000954255
Chloroxine		0.625	0.563	0.623	0.603667	0.199	0.188	0.121	0.169333	0.845764	0.759702	0.899445	0.834971	0.918	0.896	0.747	0.853667	0.551567	0.535211	1.17583	0.754203	2.42781	1.0466	0.589883	1.35477	0.355556	0.311111	0.755556	0.474074	0.5	0.203704	0.0740741	0.259259	0.764589	0.799252	0.918329	0.82739	1.11137	1.23263	1.45645	1.26682	1.76359	1.5441	3.25154	2.18641	0.793272	0.169408	0.216597	0.393092
Dehydrocholic acid		1.13	1.199	1.049	1.126	0.843	0.861	0.709	0.804333	0.986286	1.02176	1.0135	1.00718	0.867	0.894	0.914	0.891667	1.37301	1.47297	0.656974	1.16765	2.20675	2.53399	3.63634	2.79236	1.6	1.82222	0.711111	1.37778	1.92593	2.25926	2.66667	2.28395	1.35187	1.13379	1.03005	1.1719	1.07217	0.928364	1.1684	1.05631	0.943069	1.24999	0.653226	0.94876	2.05664	1.68596	2.33034	2.02432
Bendrofluazide		1.029	0.978	0.948	0.985	0.861	0.801	1.136	0.932667	1.06886	0.985454	1.00779	1.0207	0.955	0.914	0.979	0.949333	0.796002	0.572467	0.545207	0.637892	1.1631	1.38534	0.992626	1.18036	0.844444	0.577778	0.533333	0.651852	1.03704	1.14815	1.16667	1.11728	1.04439	0.689776	1.0086	0.914256	1.05821	0.91988	1.06068	1.01292	1.26027	1.2447	1.03349	1.17949	0.896481	1.33603	0.615937	0.949482
Triamterene		1	1.081	1.121	1.06733	1.184	1.116	0.942	1.08067	1.00217	1.02009	0.974736	0.999	1.031	0.93	0.958	0.973	0.258973	0.478873	1.57656	0.771468	0.498599	0.545052	0.855184	0.632945	0.266667	0.533333	1.82222	0.874074	0.611111	0.62963	0.833333	0.691358	1.49264	0.888903	0.673815	1.01845	0.964773	0.958651	0.804962	0.909462	0.496225	0.589581	0.00157179	0.362459	0.165849	0.134808	0.196468	0.165708
Homoveratrylamine		1.232	1.163	1.126	1.17367	0.923	1.014	1.325	1.08733	1.04878	1.0348	1.05735	1.04697	0.834	0.919	0.944	0.899	1.08496	0.925943	0.956838	0.989247	1.70535	2.4343	1.29642	1.81202	1.37778	1.11111	1.11111	1.2	1.62963	2.55556	1.77778	1.98765	0.933915	1.05411	1.56209	1.18337	0.943508	1.05574	1.00741	1.00222	2.20034	3.05376	2.23691	2.49701	0.549872	0.917007	1.05456	0.84048
Dolasetron mesylate		1.177	1.204	1.23	1.20367	1.242	1.335	1.265	1.28067	1.03905	1.04247	1.0707	1.05074	0.929	0.974	0.886	0.929667	0.951386	0.751477	0.770559	0.824474	1.84339	1.01888	1.17357	1.34528	1.15556	0.933333	0.977778	1.02222	2.37037	1.40741	1.53704	1.7716	0.947506	1.05399	0.873691	0.958396	1.01751	0.95747	0.83149	0.935488	0.834834	0.987803	0.81721	0.879949	1.29948	1.30424	0.973284	1.19234
Ganciclovir		1.16	1.153	1.131	1.148	1.281	1.426	1.621	1.44267	1.05544	1.01488	1.03727	1.03586	0.933	0.987	1.007	0.975667	1.44843	1.08405	0.724216	1.08557	1.17313	1.17977	0.717446	1.02345	1.73333	1.28889	0.844444	1.28889	1.55556	1.74074	1.2037	1.5	0.972818	1.27631	1.07781	1.10898	0.956825	1.05295	0.872409	0.960727	0.628485	1.76942	0.5812	0.993034	0.864273	0.650104	0.491059	0.668479
Sulfacetamide		1.038	1.063	0.879	0.993333	0.827	1.012	1.205	1.01467	1.024	1.00937	0.890769	0.974714	0.964	0.917	0.912	0.931	1.49478	1.45934	1.47115	1.47509	1.57853	1.96269	2.43563	1.99228	1.6	1.6	1.33333	1.51111	1.35185	2.05556	3.03704	2.14815	0.995761	1.10499	1.23828	1.11301	1.0232	1.04865	1.07432	1.04872	0.862663	1.20962	1.33245	1.13491	0.614268	0.64343	0.750988	0.669562
Cefoxitin sodium		1.167	1.208	1.288	1.221	0.901	0.882	1.36	1.04767	1.02475	1.04154	1.07463	1.04697	0.881	0.857	0.825	0.854333	1.03408	0.677874	0.401636	0.704528	1.80622	2.15013	1.39448	1.78361	1.24444	0.844444	0.533333	0.874074	1.68519	1.96296	1.96296	1.87037	1.38454	0.941521	0.875686	1.06725	0.929116	0.881323	0.889378	0.899939	1.48336	0.537107	0.600315	0.873593	0.54457	0.80034	0.5977	0.647536
Nicotinic acid		1.248	1.107	1.174	1.17633	1.131	1.265	1.306	1.234	1.07412	1.02368	1.07172	1.0565	0.908	0.937	0.889	0.911333	0.690595	0.895048	1.06497	0.883538	1.36071	1.5129	1.90503	1.59288	0.888889	1.02222	1.28889	1.06667	1.59259	1.98148	2.57407	2.04938	1.16596	0.921072	0.927681	1.0049	1.01718	0.954355	1.02395	0.998496	1.28509	0.682648	0.456981	0.808238	1.14822	1.9696	1.13188	1.41657
Sulfinpyrazone		1.138	1.057	0.982	1.059	1.258	1.121	1.092	1.157	1.01329	1.03394	0.984889	1.01071	0.938	0.948	1.01	0.965333	1.02226	1.87551	1.49296	1.46358	0.966967	0.925675	0.999558	0.964066	1.2	2.04444	1.51111	1.58519	1.25926	1.07407	1.12963	1.15432	0.963591	1.20137	1.09489	1.08662	1.03458	0.996885	0.909677	0.980382	1.25424	1.21313	0.765276	1.07755	0.367796	0.450276	0.79906	0.539044
SB 205607 dihydrobromide		0.605	0.635	0.671	0.637	0.736	0.753	0.648	0.712333	0.777377	0.734655	0.748448	0.753493	0.979	0.889	0.835	0.901	2.28078	0.949568	0.964107	1.39815	0.607433	1.02109	1.0494	0.892641	1.42222	0.622222	0.666667	0.903704	0.462963	0.796296	0.703704	0.654321	0.742643	1.10536	0.845511	0.897839	0.877242	0.813769	0.776179	0.822396	0.476234	0.371974	0.271318	0.373175	0.0645025	0.103951	0.138606	0.102353
Chlorpromazine hydrochloride		0.144	0.126	0.044	0.104667	0.05	0.074	0.075	0.0663333	0.695895	0.459466	0.144417	0.433259	1.053	1.072	1.092	1.07233	0.299864	1.70831	2.93139	1.64652	0.359681	0.241705	0.237871	0.279752	0.0444444	0.222222	0.133333	0.133333	0.0185185	0.0185185	0.0185185	0.0185185	0.461721	0.748753	0.928304	0.712926	0.540221	0.485877	0.690044	0.572047	0.00526209	0.0119305	0.00644435	0.00787897	0.000246224	0.000232439	0.000167039	0.000215234
Chlorpropamide		1.16	1.192	1.286	1.21267	1.388	1.218	1.57	1.392	1.01538	1.06417	1.05868	1.04607	0.906	0.95	0.986	0.947333	1.07678	0.939573	0.704225	0.906861	1.75313	1.65978	1.20808	1.54033	1.28889	1.15556	0.933333	1.12593	2.51852	2.09259	1.96296	2.19136	1.02481	1.04564	1.02444	1.03163	1.08796	0.878423	0.98969	0.985358	1.00664	0.646115	1.30281	0.985189	1.22408	1.4115	0.836117	1.15723
Tolbutamide		1.214	1.195	1.173	1.194	1.502	2.071	1.455	1.676	1.06289	1.11982	1.01176	1.06483	1.004	1.017	1.036	1.019	1.34848	0.793276	0.992276	1.04468	0.738534	0.855331	0.627341	0.740402	1.68889	0.977778	1.2	1.28889	1.14815	1.83333	0.944444	1.30864	0.84813	0.987406	1.0808	0.972111	1.0624	1.07582	1.00494	1.04772	0.982645	0.726108	0.556196	0.754983	0.337877	0.33341	0.243251	0.304846
Zardaverine		0.956	1.002	1.031	0.996333	0.809	1.43	1.343	1.194	0.978456	1.00299	0.926239	0.96923	0.915	0.904	0.963	0.927333	0.676056	1.204	0.835984	0.905346	1.37074	1.81374	1.59858	1.59436	0.666667	1.24444	0.888889	0.933333	1.14815	2.68519	2.22222	2.01852	1.04327	1.01222	1.19277	1.08275	1.03222	1.09161	0.963914	1.02925	1.1002	1.03043	1.03651	1.05571	0.251331	0.407843	0.670859	0.443344
6-Azauridine		1.014	1.077	1.054	1.04833	1.085	1.023	1.276	1.128	1.02832	1.08105	1.0227	1.04402	0.872	0.895	0.912	0.893	2.33712	2.96047	2.98501	2.76087	3.00221	2.50155	1.85046	2.45141	2.44444	3.28889	3.24444	2.99259	3.37037	2.64815	2.44444	2.82099	0.933042	0.954489	0.92818	0.93857	0.979272	0	0.931049	0.636774	2.67449	1.65113	5.17058	3.1654	1.65928	1.68695	1.52312	1.62312
Lomifylline		1.185	1.223	1.168	1.192	1.275	1.279	1.591	1.38167	1.06841	1.06755	1.02787	1.05461	0.867	0.925	0.948	0.913333	1.20036	1.05679	0.516129	0.924428	1.68382	1.56703	1.07993	1.44359	1.46667	1.33333	0.622222	1.14074	2.22222	2.07407	1.77778	2.02469	0.988404	0.929925	0.945761	0.954697	1.0043	0.96735	1.11631	1.02932	1.58191	1.27571	0.451964	1.1032	0.833748	1.75874	0.543918	1.04547
Benztropine mesylate		0.921	0.915	1.017	0.951	0.197	1.02	0.627	0.614667	0.952495	0.893966	0.976751	0.941071	0.735	0.934	0.962	0.877	1.21581	0.800545	0.974103	0.99682	1.18345	0.73647	1.05545	0.991791	1.15556	0.755556	1.02222	0.977778	0.240741	0.777778	0.685185	0.567901	0.765711	0.942519	0.972943	0.893724	0.724627	0.919987	0.832456	0.82569	0.658049	0.501645	1.14249	0.767396	0.102824	0.24157	0.31156	0.218651
Rufloxacin hydrochloride		1.008	1.037	1.229	1.09133	0.804	0.678	1.034	0.838667	0.992437	0.957814	1.08594	1.01206	1.051	0.885	0.956	0.964	1.19673	1.24671	0.666061	1.0365	1.51246	2.37428	1.33284	1.73986	1.24444	1.33333	0.844444	1.14074	1.25926	1.66667	1.42593	1.45062	1.02943	1.06833	0.859726	0.985827	1.00161	0.902266	1.04317	0.982351	2.97366	1.1651	0.783994	1.64092	0.270449	0.283799	0.431653	0.328633
Fluocinolone acetonide		0.922	1.032	0.922	0.958667	1.199	0.975	1.069	1.081	0.920921	1.03889	0.977073	0.978962	0.933	0.95	1.003	0.962	3.64562	2.79691	1.8219	2.75481	3.14939	2.36617	2.05884	2.5248	3.46667	2.97778	1.73333	2.72593	3.90741	2.38889	2.27778	2.85802	0.992643	0.965087	1.00424	0.987323	1.02427	0.970895	0.888412	0.961193	10.0974	3.06299	10.4334	7.8646	2.69564	3.1496	3.04537	2.96354
Torasemide		1.157	1.125	1.183	1.155	1.461	1.045	0.891	1.13233	1.06551	1.05892	1.03245	1.05229	0.956	0.956	0.892	0.934667	1.75102	1.99091	1.16583	1.63592	1.42088	1.86698	1.92877	1.73888	2.08889	2.31111	1.42222	1.94074	2.14815	2.01852	1.77778	1.98148	1.07045	1.05249	1.298	1.14032	0.874772	0.897648	1.00591	0.926109	1.4368	2.83187	0.873462	1.71405	1.18405	2.12025	0.86234	1.38888
Secnidazole		1.278	1.253	1.123	1.218	1.813	1.392	1.228	1.47767	1.06695	1.03511	1.03563	1.04589	1	0.981	1.005	0.995333	0.843253	0.58428	0.690595	0.706043	0.987023	0.861377	0.990857	0.946419	1.11111	0.755556	0.8	0.888889	1.85185	1.24074	1.25926	1.45062	0.943641	0.833915	0.653117	0.810224	0.997852	1.15423	1.03061	1.0609	0.984618	0.640278	1.05979	0.894894	0.409508	0.334267	0.460843	0.401539
Clobenpropit		0.985	1.049	0.918	0.984	0.809	1.369	1.434	1.204	1.0005	0.999542	0.871067	0.957035	0.971	1.011	1	0.994	1.04952	1.60109	0.516129	1.05558	1.01711	1.42501	0.898245	1.11345	1.06667	1.73333	0.488889	1.0963	0.851852	2.01852	1.33333	1.40123	1.17319	0.820449	1.11596	1.03653	1.18709	0.982816	1.13328	1.10106	1.62356	0.555823	0.575902	0.91843	0.414677	0.752458	0.661692	0.609609
Ormetoprim		1.057	1.124	1.036	1.07233	0.901	1.392	1.437	1.24333	0.941335	0.978241	0.996211	0.971929	0.924	0.996	1.021	0.980333	1.79282	1.26488	0.956838	1.33818	1.76641	0.925675	1.17077	1.28762	1.95556	1.46667	1.02222	1.48148	1.64815	1.33333	1.74074	1.57407	0.959975	1.20786	0.838529	1.00212	1.04232	0.905273	0.886801	0.944796	0.938472	0.397265	1.38577	0.90717	0.291135	0.448228	0.370327	0.369897
Levonorgestrel		1.171	1.146	1.07	1.129	1.148	1.608	1.685	1.48033	1.04887	1.0302	1.03466	1.03791	0.955	1.017	0.976	0.982667	0.956838	1.27851	0.805997	1.01378	1.96416	1.25763	0.987318	1.40304	1.15556	1.51111	0.888889	1.18519	2.33333	2.09259	1.72222	2.04938	1.04576	1.16509	0.971322	1.06072	0.781549	1.00709	1.0697	0.95278	0.826639	1.66158	0.597154	1.02846	0.792084	0.836731	0.358618	0.662477
Loxapine succinate		0.901	0.942	0.967	0.936667	1.57	1.528	1.586	1.56133	0.973863	0.976697	0.932887	0.961149	0.995	1.01	1.049	1.018	0.861427	1.18946	1.24761	1.0995	0.615396	0.609055	0.665684	0.630045	0.8	1.15556	1.24444	1.06667	1	0.962963	1.09259	1.01852	1.06222	0.940648	0.972943	0.991937	0.92192	0.899259	1.10396	0.975047	0.587936	0.516863	0.562288	0.555696	0.306356	0.197653	0.296663	0.26689
Dipyridamole	2	1.238	1.217	1.106	1.187	1.478	0.89	1.265	1.211	1.09771	1.11273	1.00096	1.07046	1.017	0.991	1.027	1.01167	1.24041	0.856969	1.09191	1.0631	2.3991	1.76758	1.74846	1.97171	1.6	1.08571	1.25714	1.31429	3.06748	1.36196	1.91411	2.11452	0.718033	0.979487	0.745193	0.814238	0.813649	0.731129	0.741761	0.76218	3.67803	7.07629	1.27831	4.01088	1.2827	1.83459	1.03363	1.38364
Mexiletine hydrochloride		1.093	1.1	1.076	1.08967	1.259	1.09	1.268	1.20567	1.03651	1.0552	1.02907	1.04026	0.946	0.89	0.965	0.933667	0.853317	2.19477	1.02009	1.35606	1.02503	1.66505	1.43091	1.37366	0.971429	2.51429	1.14286	1.54286	1.11656	1.57055	1.57055	1.41922	1.19034	0.818383	1.09385	1.03419	1.15112	1.01028	0.911254	1.02422	3.75676	3.66231	3.19277	3.53728	1.25493	1.15353	2.04472	1.48439
Beclomethasone dipropionate		0.897	0.932	0.992	0.940333	0.726	0.959	0.929	0.871333	1.04281	1.06419	1.0879	1.06497	0.866	0.793	0.903	0.854	1.16251	1.88436	2.37858	1.80848	1.543	2.32193	1.99973	1.95489	1.08571	1.82857	2.45714	1.79048	0.969325	1.92638	1.60736	1.50102	1.46008	1.0055	1.16446	1.21002	0.93282	0.924012	0.941528	0.932787	6.47759	16.8392	12.9489	12.0886	4.61712	7.03765	8.82931	6.82803
Nafcillin sodium		1.127	1.02	0.91	1.019	0.907	1.048	0.793	0.916	1.11481	1.04122	1.08345	1.07983	1.015	0.976	0.952	0.981	1.75167	1.61412	1.9294	1.76506	1.81247	1.50116	1.64447	1.6527	2.05714	1.71429	1.82857	1.86667	1.42331	1.36196	1.12883	1.3047	1.02623	1.17347	0.800086	0.999929	0.754923	0.908318	0.926847	0.863363	8.34772	2.95563	0.915884	4.07308	4.40067	2.6894	2.32673	3.13893
Bestatin		0.998	0.962	1.015	0.991667	0.902	1.085	0.791	0.926	0.990472	1.02063	1.01881	1.00997	1.022	0.898	0.893	0.937667	0.82532	1.48265	0.864273	1.05742	1.30447	1.30726	1.43383	1.34852	0.857143	1.48571	0.914286	1.08571	1.0184	1.22699	0.981595	1.07566	1.16518	1.40662	0.987635	1.18648	0.896674	0.879056	0.920468	0.898733	0.925272	2.12388	0.552979	1.20071	0.405435	1.38254	1.87991	1.22263
Tranilast		1.013	1.019	1.022	1.018	1.01	0.917	0.659	0.862	0.987361	0.990229	0.97762	0.98507	0.971	0.942	0.895	0.936	3.25015	1.6689	0.912964	1.944	3.04655	1.88631	2.58304	2.5053	3.42857	1.77143	0.971429	2.05714	2.66258	1.49693	1.47239	1.8773	1.26067	0.993067	1.16775	1.1405	1.09178	0.96603	1.0044	1.02074	7.90651	8.70299	7.00744	7.87232	4.7372	3.74666	6.00032	4.82806
Chloramphenicol		1.053	1.04	0.994	1.029	1.056	1.119	1.429	1.20133	1.04356	1.03133	1.04591	1.04026	0.925	0.958	0.968	0.950333	1.92818	2.16433	2.20937	2.10063	2.068	1.52069	1.339	1.64256	2.11429	2.34286	2.28571	2.24762	1.88957	1.47239	1.65644	1.6728	1.1709	1.14631	1.15117	1.15612	0.903053	0.912165	0.796233	0.870484	11.306	15.0802	10.1666	12.1843	3.5089	2.81451	2.31672	2.88005
Azelastine hydrochloride		0.702	0.701	0.611	0.671333	0.306	0.373	0.183	0.287333	0.910846	0.790297	0.908533	0.869892	0.857	0.768	0.838	0.821	0.390749	0.782715	0.718198	0.630554	0.69407	0.646922	0.466034	0.602342	0.285714	0.571429	0.457143	0.438095	0.184049	0.208589	0.0736196	0.155419	0.801372	1.14359	0.87785	0.940938	0.572166	0.762315	0.507163	0.613881	3.63191	2.3327	1.12157	2.36206	0.497023	0.448447	0.357322	0.434264
Lofexidine hydrochloride		1.126	1.029	1.092	1.08233	1.042	1.163	1.475	1.22667	1.04346	1.03802	1.01167	1.03105	0.997	0.915	0.999	0.970333	0.682897	0.799757	1.20633	0.896328	1.38801	1.31709	1.35507	1.35339	0.8	0.857143	1.37143	1.00952	1.25153	1.32515	1.73006	1.43558	1.13273	1.07083	0.85555	1.0197	0.999544	1.07224	0.961778	1.01119	2.46479	1.44297	1.31771	1.74182	1.40092	1.39967	1.15232	1.31764
Levosulpiride		1.123	1.118	1.004	1.08167	0.883	0.839	0.854	0.858667	1.02954	0.982964	0.965418	0.992641	0.944	0.906	0.883	0.911	0.831406	0.490566	0.709677	0.677216	1.76652	1.40248	2.09177	1.75359	0.971429	0.571429	0.742857	0.761905	1.34969	1.0184	1.54601	1.3047	1.22736	1.27167	1.32271	1.27391	0.867008	0.88827	0.776996	0.844091	2.32629	1.93754	1.18933	1.81772	2.33173	1.87651	2.08065	2.0963
Amcinonide		1.035	1.003	1.01	1.016	1.244	1.048	1.277	1.18967	1.12763	1.09684	1.1204	1.11496	0.83	0.874	0.92	0.874667	1.37918	2.24346	1.46683	1.69649	2.05206	1.98805	2.10983	2.04998	1.48571	2.34286	1.54286	1.79048	2.20859	1.80368	2.33129	2.11452	0.769066	1.08055	0.956186	0.935268	0.686276	0.915912	0.759176	0.787121	16.6745	20.2191	13.9033	16.9323	5.25981	3.49562	3.74642	4.16728
Montelukast sodium		1.276	1.28	1.141	1.23233	1.046	1.286	0.84	1.05733	1.13635	1.08597	1.08033	1.10088	0.955	1.002	0.992	0.983	0.30067	0.256847	0.288497	0.282004	0.718242	0.749452	0.793147	0.753614	0.4	0.342857	0.342857	0.361905	0.650307	0.834356	0.576687	0.687117	1.0288	0.963619	0.758916	0.917113	0.909836	0.813952	0.823166	0.848985	1.30247	0.950954	0.848608	1.03401	1.88344	1.79795	1.97621	1.88586
Mupirocin		1.097	1.149	1.02	1.08867	0.881	0.894	1.431	1.06867	1.03198	1.07301	1.03	1.04499	0.988	0.916	0.95	0.951333	1.30128	0.859404	1.82836	1.32968	1.15904	1.17418	1.09025	1.14116	1.48571	1.02857	1.94286	1.48571	0.883436	0.907975	1.34969	1.04703	1.29297	0.948038	1.18076	1.14059	0.924113	0.965322	0.916823	0.935419	3.04236	1.40354	1.88736	2.11109	1.07162	2.25052	0.900638	1.40759
Diazepam		1.099	1.193	1.146	1.146	0.966	0.894	1.203	1.021	1.01766	1.07314	1.09161	1.0608	0.938	0.843	0.935	0.905333	1.84784	1.24163	1.86732	1.65226	1.37951	2.69752	1.48483	1.85395	2.11429	1.54286	2.22857	1.9619	1.15337	2.08589	1.54601	1.59509	1.17518	1.41148	1.07212	1.21959	0.95226	0.959854	0.928062	0.946725	1.71088	2.58594	4.43795	2.91159	1.1496	2.44231	1.83301	1.8083
Stiripentol		1.036	0.933	1.196	1.055	1.725	1.674	1.449	1.616	1.00386	0.98011	1.08674	1.02357	0.983	0.988	0.965	0.978667	1.32319	1.17712	0.82532	1.10854	0.73139	0.906302	1.00804	0.881909	1.42857	1.14286	1.02857	1.2	1.09202	1.31288	1.2638	1.2229	1.29626	1.12058	1.15474	1.19053	0.88179	0.898901	0.996811	0.925834	1.11353	1.13397	1.5135	1.25367	1.32527	0.90347	0.819008	1.01592
Bumetanide		1.202	1.072	1.074	1.116	1.144	1.298	1.26	1.234	1.0718	0.993421	1.04101	1.03541	0.932	0.938	0.979	0.949667	1.09556	1.535	0.51126	1.04727	1.20181	1.35427	0.664055	1.07338	1.37143	1.71429	0.571429	1.21905	1.19018	1.52147	0.723926	1.14519	1.25938	1.54871	0.930169	1.24609	0.937984	1.10839	0.983851	1.01007	1.99654	2.15261	4.80693	2.98536	0.925502	0.831433	0.784754	0.84723
Phenothiazine		1.014	1.053	0.999	1.022	0.868	1.225	1.652	1.24833	1.01355	0.999982	1.01079	1.00811	0.976	0.945	1.004	0.975	1.51552	1.35484	1.7042	1.52485	1.91128	1.25055	1.3908	1.51754	1.6	1.48571	1.77143	1.61905	1.43558	1.32515	1.98773	1.58282	1.19362	1.07626	1.18705	1.15231	0.963702	1.04116	1.00248	1.00245	1.78105	1.80061	2.14709	1.90958	1.31457	1.61338	1.38931	1.43909
5-Nonyloxytryptamine hydrochloride		0.344	0.183	0.096	0.207667	0.393	0.358	0.319	0.356667	0.980962	0.926308	0.625836	0.844369	0.839	0.769	0.92	0.842667	0.637858	1.4997	1.13816	1.09191	0.469221	0.118999	0.31091	0.29971	0.228571	0.285714	0.114286	0.209524	0.159509	0.0368098	0.0858896	0.0940695	0.548353	0.765349	0.473304	0.595669	0.422721	0.446818	0.394573	0.421371	0.0155737	0.00677971	0.0211402	0.0144979	0.000370068	0.000275769	0.000273312	0.000306383
Prostaglandin E1		1.348	1.22	1.272	1.28	1.55	1.757	1.627	1.64467	1.15735	1.12784	1.1255	1.1369	0.989	1.003	0.986	0.992667	0.854534	1.30493	1.12234	1.09393	1.1617	0.887576	1.10671	1.052	1.2	1.65714	1.48571	1.44762	1.55828	1.34969	1.55828	1.48875	1.76699	1.01966	1.46623	1.41763	0.802916	0.877335	1.03589	0.905381	5.2817	4.78656	4.01329	4.69385	3.23049	1.95871	1.74522	2.31148
Benproperine phosphate		0.99	1.004	1.005	0.999667	0.716	0.762	0.313	0.597	1.01446	0.994247	1.04207	1.01692	0.875	0.839	0.871	0.861667	1.99635	2.02313	0.819233	1.6129	0.950129	1.20911	1.67714	1.27879	2.05714	2.11429	0.857143	1.67619	0.588957	0.797546	0.453988	0.613497	1.06297	1.38975	0.823386	1.09204	0.989419	0.917329	0.837746	0.914832	4.21568	4.79883	4.3335	4.44934	1.33272	1.17966	1.83384	1.44874
Disulfiram		0.106	0.083	0.103	0.0973333	0.079	0.16	0.078	0.105667	0.782897	0.8308	0.848468	0.820722	1.071	1.072	0.942	1.02833	2.07182	0.660986	2.13512	1.62264	0.179428	0.265622	0.181951	0.209	0.228571	0.0571429	0.228571	0.171429	0.0122699	0.0368098	0.0122699	0.0204499	0.581803	0.589522	0.864413	0.678579	0.381815	0.410166	0.625829	0.472603	0.0184816	0.0093221	0.0108279	0.0128772	0.000557036	0.000361254	0.000352653	0.000423647
Zalcitabine		1.165	1.07	0.994	1.07633	1.106	0.71	0.942	0.919333	1.06079	1.00407	1.00127	1.02204	0.92	0.875	0.928	0.907667	0.706026	0.614729	1.48996	0.936904	1.42294	1.59772	1.15944	1.39336	0.857143	0.685714	1.54286	1.02857	1.36196	0.981595	0.944785	1.09611	0.95104	1.58916	1.61318	1.38446	0.90366	0.831266	0.882094	0.87234	1.3209	1.47508	1.36169	1.38589	0.909355	1.04518	1.31274	1.08909
Methylandrostenediol		1.044	1.245	1.068	1.119	1.378	1.291	1.285	1.318	1.02161	1.07264	1.044	1.04609	0.93	0.965	0.924	0.939667	1.4717	0.748631	0.66829	0.962873	0.946411	0.713992	1.04788	0.90276	1.6	0.971429	0.742857	1.10476	1.12883	0.797546	1.16564	1.03067	1.3706	1.29469	1.16746	1.27758	0.929378	0.789855	1.00957	0.9096	1.1676	2.49928	5.19718	2.95469	1.14107	1.15508	0.797593	1.03125
Diphenhydramine hydrochloride		1.132	1.091	1.048	1.09033	1.429	1.631	1.226	1.42867	1.05446	0.980353	1.10542	1.04674	0.959	0.989	1.013	0.987	0.533171	1.15764	0.680463	0.790424	0.773624	0.634438	0.76353	0.723864	0.628571	1.31429	0.742857	0.895238	0.957055	0.895706	0.809816	0.887526	0.895147	0.944893	1.47481	1.10495	0.842809	1.04085	0.92796	0.937208	1.45701	2.31603	1.55253	1.77519	0.604863	0.765818	0.832745	0.734475
Carvedilol		0.688	0.664	0.713	0.688333	0.306	0.283	0.262	0.283667	0.956544	0.989119	0.961157	0.96894	1.068	1.02	1.061	1.04967	2.23372	2.23128	2.92392	2.46297	2.63776	3.35786	2.33096	2.77553	1.6	1.54286	2.17143	1.77143	0.699387	0.822086	0.527607	0.683027	1.105	1.09914	1.36602	1.19005	1.40586	1.17602	0.961879	1.18126	11.0947	14.1489	15.2856	13.5097	4.81003	4.46816	3.2514	4.17653
Trazodone hydrochloride		1.069	1.049	0.999	1.039	1.264	1.21	1.378	1.284	1.03043	1.00734	0.96742	1.00173	0.885	0.903	0.963	0.917	1.69446	1.25624	0.769324	1.24001	1.95179	1.28946	1.08015	1.44047	1.88571	1.37143	0.8	1.35238	2.13497	1.34969	1.28834	1.591	1.07555	1.14345	1.3746	1.19787	0.984154	1.0444	1.00127	1.00994	2.51153	2.71068	1.81547	2.34589	2.05685	1.53114	0.56285	1.38361
trans-Retinoic acid		0.859	0.858	0.875	0.864	0.913	1.316	1.113	1.114	1.00503	0.976755	0.904894	0.962226	0.941	0.958	0.928	0.942333	0.127815	0.25563	0.626902	0.336782	1.04071	0.947872	0.674812	0.887797	0.114286	0.228571	0.571429	0.304762	0.822086	1.07975	0.650307	0.850716	0.984204	1.13001	0.978343	1.03085	0.813142	0.885739	0.914393	0.871091	0.305111	0.542354	0.745548	0.531004	0.893197	0.885632	0.433354	0.737394
Ribavirin		1.107	1.127	1.015	1.083	1.085	1.313	1.05	1.14933	1.03939	0.993502	0.979771	1.00422	0.915	0.912	0.986	0.937667	1.38771	0.973828	1.02739	1.12964	1.90849	1.34976	1.44419	1.56748	1.6	1.14286	1.08571	1.27619	1.79141	1.53374	1.31288	1.54601	1.16861	0.913444	0.90644	0.996164	0.925935	1.02476	0.987698	0.979463	5.93844	3.74254	3.03381	4.23826	2.43986	2.30177	3.73342	2.82502
Cisapride hydrate	3	1.185	1.232	1.282	1.233	1.339	1.405	1.609	1.451	1.12577	1.10277	1.13046	1.11967	0.963	0.87	0.923	0.918667	1.38836	1.73943	1.08901	1.4056	3.28107	3.61817	1.72395	2.87439	1.5	1.95455	1.27273	1.57576	4.32099	5	2.7284	4.01646	1.11383	1.00768	1.39572	1.17241	0.67188	0.942153	0.823139	0.812391	0.933307	0.863613	1.05068	0.949201	0.740742	0.79571	0.877113	0.804522
Ethambutol		1.132	1.268	1.262	1.22067	1.203	1.194	1.452	1.283	1.05249	1.05107	1.08406	1.06254	0.936	0.914	1.038	0.962667	1.18946	1.21929	0.552959	0.987237	1.22055	0.946378	0.734922	0.967283	1.22727	1.40909	0.636364	1.09091	1.44444	1.11111	1.04938	1.20165	1.21961	1.14215	0.872833	1.0782	1.05581	0.880343	1.09609	1.01075	1.09813	0.528308	0.443516	0.689985	1.2116	1.16804	1.23268	1.20411
Riluzole hydrochloride		1.248	1.176	1.159	1.19433	1.599	1.945	1.622	1.722	1.12015	1.08445	1.10603	1.10354	0.994	0.954	0.998	0.982	1.15863	1.31477	1.24714	1.24018	0.941675	0.754887	1.18376	0.960106	1.31818	1.40909	1.31818	1.34848	1.48148	1.44444	1.88889	1.60494	0.998921	1.28678	1.09085	1.12552	1.13144	1.09738	1.05903	1.09595	0.4626	0.673456	0.414239	0.516765	1.23338	1.18994	1.57983	1.33438
Glipizide		0.906	0.9	0.847	0.884333	1.28	1.176	1.081	1.179	1.02295	0.938222	0.882053	0.947741	0.959	0.953	0.984	0.965333	1.70761	1.49577	0.765788	1.32306	1.0001	1.35591	1.11498	1.157	1.40909	1.22727	0.590909	1.07576	1.25926	1.5679	1.18519	1.33745	0.906863	1.40169	1.39255	1.2337	0.973862	0.972683	0.87745	0.941332	1.37991	1.29	0.483087	1.051	2.0236	1.95074	1.65695	1.8771
Trihexyphenidyl hydrochloride		1.2	1.152	1.287	1.213	1.485	2.211	1.701	1.799	1.14813	1.08443	1.12342	1.11866	0.98	1.026	0.949	0.985	0.789657	1.08205	1.08503	0.985579	0.760531	0.692694	0.877809	0.777011	0.863636	1.13636	1.27273	1.09091	1.11111	1.50617	1.46914	1.36214	0.724525	1.2257	1.42886	1.12636	0.865131	0.826995	0.923192	0.871773	0.884124	0.961743	1.32169	1.05585	1.64983	1.59751	2.04343	1.76359
Busulfan		1.045	1.056	1.199	1.1	1.579	1.484	1.387	1.48333	1.06284	1.01916	1.07125	1.05108	0.911	0.951	0.966	0.942667	1.05022	0.802586	1.04028	0.964363	1.15261	1.01484	0.923069	1.03017	1	0.772727	1.13636	0.969697	1.79012	1.48148	1.25926	1.51029	1.18189	1.37248	1.3415	1.29863	1.00653	1.01735	0.950937	0.991609	1.28017	0.654854	0.609187	0.84807	2.27941	3.18243	3.54617	3.00267
Trimethoprim		1.224	1.198	1.059	1.16033	1.819	1.824	1.419	1.68733	1.11333	1.11647	1.06157	1.09713	1.023	0.989	0.931	0.981	1.1815	1.08205	1.22327	1.16227	1.15909	1.04599	1.30877	1.17128	1.31818	1.18182	1.18182	1.22727	2.07407	1.87654	1.82716	1.92593	0.778363	0.998667	0.849597	0.875542	0.864167	0.972683	1.06535	0.967399	0.91049	1.0389	0.291695	0.747028	2.5466	3.15115	3.56625	3.088
Flumadine hydrochloride		0.933	0.914	0.778	0.875	1.364	1.267	1.371	1.334	0.977353	0.973242	0.94691	0.965835	0.891	0.938	0.94	0.923	0.801591	1.0363	2.05172	1.29654	1.64702	1.58524	1.2356	1.48929	0.681818	0.863636	1.45455	1	2.20988	1.97531	1.66667	1.95062	0.832074	1.23179	0.981271	1.01505	0.919122	1.07167	1.01682	1.00254	0.672615	0.830011	1.10789	0.870171	1.96995	2.36271	2.52007	2.28424
Cytarabine		1.015	0.964	1.114	1.031	0.959	1.466	1.673	1.366	1.00808	1.07786	1.09492	1.06029	0.903	0.923	0.936	0.920667	1.08105	2.3272	1.2541	1.55412	1.12501	0.787603	0.585241	0.832619	1	2.04545	1.27273	1.43939	1.06173	1.1358	0.962963	1.0535	0.936448	1.10063	1.00044	1.01251	1.01028	0.991537	1.04692	1.01625	0.720476	1.45747	0.891973	1.02331	0.885872	0.881187	0.391905	0.719655
(-)-Cotinine		1.324	1.274	1.35	1.316	1.502	1.577	1.219	1.43267	1.11315	1.09002	1.11477	1.10598	0.914	0.993	1.003	0.97	1.20537	0.90005	0.738936	0.948119	0.685168	1.23393	0.854709	0.924602	1.45455	1.04545	0.909091	1.13636	1.01235	1.91358	1.02469	1.31687	1.11142	1.06533	1.25732	1.14469	1.04446	0.955758	1.03964	1.01328	1.18946	1.03856	0.654405	0.960806	1.29535	1.82561	1.71167	1.61088
Sotalol hydrochloride		1.263	1.246	1.312	1.27367	1.04	1.526	1.877	1.481	1.09004	1.09658	1.11971	1.10211	1.024	1.055	1.033	1.03733	0.513178	0.520139	0.797613	0.61031	1.20696	1.20895	1.23048	1.21546	0.590909	0.590909	0.954545	0.712121	1.23457	1.81481	2.2716	1.77366	1.21795	1.03346	0.954987	1.0688	0.972576	1.03074	1.04606	1.01646	0.433845	0.356248	0.422341	0.404145	0.706903	1.67174	1.09633	1.15832
3,5,3'-Triiodothyronine		0.886	0.878	0.695	0.819667	1.022	1.131	1.437	1.19667	0.953078	0.971693	0.847301	0.924024	1.005	0.934	0.953	0.964	1.80109	1.75932	2.15316	1.90453	2.02665	1.39814	1.54563	1.65681	1.45455	1.40909	1.36364	1.40909	2.03704	1.55556	2.18519	1.92593	1.16361	0.911561	1.18608	1.08708	0.943332	0.93594	0.932191	0.937154	1.6883	2.15919	2.02228	1.95659	2.86717	1.58254	2.71714	2.38895
Lorazepam		1.105	1.195	1.25	1.18333	2.052	1.848	2.087	1.99567	1.07189	1.12802	1.18274	1.12755	1.002	0.968	1.028	0.999333	0.993536	1.54451	1.27698	1.27167	0.703355	0.719975	0.721647	0.714993	1	1.68182	1.45455	1.37879	1.41975	1.30864	1.48148	1.40329	0.956257	1.02647	0.952067	0.978266	0.926299	1.08688	0.962185	0.991787	1.45174	1.85694	1.10818	1.47229	1.60434	1.80219	1.95734	1.78795
Goserelin acetate		1.083	1.049	1.045	1.059	1.723	1.595	1.007	1.44167	1.05722	1.10604	1.03311	1.06546	0.958	0.972	0.942	0.957333	1.19741	0.997514	0.763799	0.986242	1.29654	1.30657	1.20842	1.27051	1.18182	0.954545	0.727273	0.954545	2.19753	2.04938	1.19753	1.81481	1.23357	1.32182	1.15574	1.23704	1.03867	0.92737	1.17965	1.04856	1.24223	1.10329	0.376987	0.907506	2.78605	1.91433	3.21824	2.63954
Famotidine		0.899	1.003	0.814	0.905333	1.111	1.124	1.029	1.088	0.977508	1.00187	0.920818	0.966732	0.982	0.977	0.946	0.968333	0.776728	2.13824	2.38787	1.76761	1.90969	1.65276	1.96362	1.84203	0.636364	1.95455	1.77273	1.45455	2.08642	1.82716	1.98765	1.96708	1.32665	0.95778	1.27357	1.186	1.01371	1.05228	1.00686	1.02428	0.893517	0.428839	0.55152	0.624625	0.983193	1.22022	0.926756	1.04339
Glycopyrronium bromide		0.918	0.845	0.778	0.847	1.177	1.079	1.144	1.13333	1.01799	0.937631	0.93511	0.963577	0.976	0.95	0.886	0.937333	2.06564	2.41969	1.92342	2.13625	1.37588	1.75562	1.33814	1.48988	1.72727	1.86364	1.36364	1.65152	1.59259	1.8642	1.50617	1.65432	0.918672	0.918926	1.07434	0.970647	0.919764	1.05442	1.00268	0.992287	2.21176	1.25498	1.68665	1.7178	1.39882	2.34274	2.08562	1.94239
Mesoridazine besylate		0.92	0.954	0.986	0.953333	1.034	0.979	1.183	1.06533	1.00656	1.07143	1.03925	1.03908	0.865	0.889	0.947	0.900333	1.51865	1.62009	2.27648	1.80507	1.06836	0.884917	0.700429	0.884568	1.27273	1.40909	2.04545	1.57576	1.08642	0.851852	0.814815	0.917695	0.969208	0.862929	1.0572	0.963113	0.749223	0.876058	0.833208	0.819497	1.4274	2.37933	1.87967	1.89547	0.277066	0.392748	0.462199	0.377337
Diphenylcyclopropenone		0.074	0.038	0.012	0.0413333	0.113	0.159	0.065	0.112333	0.580366	0.600797	1.04077	0.740646	0.928	0.767	0.883	0.859333	8.73595	3.97812	0	4.23802	0	0.0792307	0	0.0264102	0.590909	0.136364	0	0.242424	0	0.0123457	0	0.00411523	0.486318	0.492413	0	0.326244	0	0.389609	0	0.12987	0.00274091	0.00260649	0.00296466	0.00277069	0.000667944	0.00128049	0.000613722	0.000854053
Tramadol hydrochloride		1.301	1.186	1.171	1.21933	1.101	1.288	1.805	1.398	1.13506	1.07291	1.05669	1.08822	1.03	1.014	1.016	1.02	0.651417	0.715067	1.14968	0.83872	1.08289	1.30532	1.15449	1.1809	0.772727	0.772727	1.22727	0.924242	1.17284	1.65432	2.04938	1.62551	0.923878	0.880071	1.08666	0.963537	1.01543	0.987252	1.07188	1.02485	0.440263	0.584488	0.392706	0.472486	0.664745	1.27947	1.21603	1.05341
Calcitriol		0.749	0.806	0.646	0.733667	0.722	0.654	0.85	0.742	1.01791	0.957724	0.860382	0.945338	1.007	0.997	1.004	1.00267	1.19841	0.681253	0.771755	0.883806	0.956517	1.16996	0.856277	0.994251	0.818182	0.5	0.454545	0.590909	0.679012	0.753086	0.716049	0.716049	0.607707	1.20576	1.1805	0.99799	0.922657	0.760686	0.786288	0.82321	0.667296	0.753742	0.304069	0.575036	1.54623	2.33388	2.21794	2.03269
Gatifloxacin		1.105	1.224	1.271	1.2	1.406	1.639	1.637	1.56067	1.12636	1.14517	1.11593	1.12915	0.962	0.974	0.99	0.975333	1.17355	1.62904	0.784684	1.19576	0.830145	0.650883	0.720916	0.733981	1.18182	1.81818	0.909091	1.30303	1.14815	1.04938	1.16049	1.11934	0.937718	0.901657	1.10317	0.980848	0.938511	0.976433	0.889234	0.934726	1.94561	2.29947	2.01401	2.08636	0.757443	0.974352	1.25716	0.996319
Tibolone		0.896	0.781	0.927	0.868	1.697	1.323	1.107	1.37567	0.976297	1.00502	1.07817	1.01983	1.024	1.033	1.055	1.03733	0.167081	0.702138	0.214818	0.361346	0.576983	0.502665	0.476116	0.518588	0.136364	0.5	0.181818	0.272727	0.962963	0.654321	0.518519	0.711934	0.790299	1.04793	0.788902	0.875712	0.892555	0.965185	0.985753	0.947831	0.252194	0.599782	0.263273	0.37175	1.03254	1.03774	1.23187	1.10071
Metronidazole		0.856	0.904	0.783	0.847667	0.913	0.914	0.971	0.932667	0.932139	1.00746	0.941137	0.960245	0.981	0.962	0.945	0.962667	0.582795	1.15863	1.20935	0.98359	1.36156	1.23623	1.40828	1.33535	0.454545	0.954545	0.863636	0.757576	1.22222	1.11111	1.34568	1.22634	1.2083	1.12856	0.962733	1.09987	1.15683	0.958972	1.00664	1.04081	1.70618	0.378003	1.01961	1.0346	1.33502	1.07435	1.13828	1.18255
Oligomycin A		0.349	0.276	0.208	0.277667	0.228	0.279	0.342	0.283	0.663585	0.720669	0.627706	0.670653	0.986	0.988	1.021	0.998333	1.14272	0.541024	0.479364	0.721034	0.275112	0.901118	0.586809	0.58768	0.363636	0.136364	0.0909091	0.19697	0.0617284	0.246914	0.197531	0.168724	0.877278	0.546632	0.461304	0.628405	0.62121	0.793144	0.6421	0.685485	0.229102	0.116019	0.027455	0.124192	0.0727241	0.543211	0.912459	0.509465
					#DIV/0!	#N/A	#N/A	#N/A	#N/A				#DIV/0!	#N/A	#N/A	#N/A	#N/A				#DIV/0!	#N/A	#N/A	#N/A	#N/A				#DIV/0!	#N/A	#N/A	#N/A	#N/A				#DIV/0!	#N/A	#N/A	#N/A	#N/A					#N/A	#N/A	#N/A	#N/A
					#DIV/0!	#N/A	#N/A	#N/A	#N/A				#DIV/0!	#N/A	#N/A	#N/A	#N/A				#DIV/0!	#N/A	#N/A	#N/A	#N/A				#DIV/0!	#N/A	#N/A	#N/A	#N/A				#DIV/0!	#N/A	#N/A	#N/A	#N/A				#DIV/0!	#N/A	#N/A	#N/A	#N/A
					#DIV/0!	#N/A	#N/A	#N/A	#N/A				#DIV/0!	#N/A	#N/A	#N/A	#N/A				#DIV/0!	#N/A	#N/A	#N/A	#N/A				#DIV/0!	#N/A	#N/A	#N/A	#N/A				#DIV/0!	#N/A	#N/A	#N/A	#N/A				#DIV/0!	#N/A	#N/A	#N/A	#N/A
					#DIV/0!	#N/A	#N/A	#N/A	#N/A				#DIV/0!	#N/A	#N/A	#N/A	#N/A				#DIV/0!	#N/A	#N/A	#N/A	#N/A				#DIV/0!	#N/A	#N/A	#N/A	#N/A				#DIV/0!	#N/A	#N/A	#N/A	#N/A				#DIV/0!	#N/A	#N/A	#N/A	#N/A
Ebselen	13	0.035	0.037	0.098	0.0566667	0.139	0.186	0.281	0.202	0.90718	1.03342	1.02986	0.990154	0.85	1.022	1.075	0.982333	1.47295	5.69846	1.58983	2.92041	0.0896892	0.201203	0.177296	0.156063	0.0533333	0.213333	0.16	0.142222	0.0137931	0.0413793	0.0551724	0.0367816	0.40872	0.416211	0.486135	0.437022	0.560958	0.498678	0.540342	0.533326	0.171717	0.326117	1.60455	0.700795	0.109143	0.196672	0.596074	0.30063
Taxifolin-(+/-)		1.235	1.058	1.128	1.14033	0.764	0.595	0.34	0.566333	1.05681	1.03065	1.00516	1.03088	1.095	1.114	1.05	1.08633	0.989789	0.958505	0.945036	0.964443	0.490167	0.523868	1.02823	0.680754	1.25333	1.04	1.09333	1.12889	0.413793	0.344828	0.386207	0.381609	1.1348	0.943863	1.4017	1.16012	0.869664	1.01236	1.17254	1.01819	1.65337	1.67338	1.28802	1.53825	0.545188	0.544325	0.662401	0.583971
Naphazoline hydrochloride		1.184	1.337	1.351	1.29067	1.289	1.347	1.626	1.42067	1.02654	1.05897	1.05193	1.04581	0.993	1.053	1.046	1.03067	0.790354	0.603085	0.769498	0.720979	0.667618	0.8517	0.652271	0.723863	0.96	0.826667	1.06667	0.951111	0.951724	1.26897	1.17241	1.13103	0.830758	0.992144	0.980178	0.93436	1.14825	0.935075	1.02099	1.03477	4.34658	1.15622	0.989574	2.16413	0.510098	0.694216	0.71396	0.639425
Chlordiazepoxide		1.004	1.036	1.026	1.022	1.194	1.026	1.032	1.084	1.06396	1.08017	1.084	1.07604	0.975	0.966	0.985	0.975333	1.29481	1.50597	1.03889	1.27989	0.710573	0.790622	0.83404	0.778412	1.33333	1.6	1.09333	1.34222	0.937931	0.896552	0.951724	0.928736	0.875293	0.850216	0.910254	0.878588	0.931405	1.06007	0.871283	0.954252	0.977507	0.636488	0.994893	0.869629	0.924885	0.901013	0.90267	0.909523
Lobeline hydrochloride		1.272	1.417	1.443	1.37733	2.166	1.255	1.226	1.549	1.08531	1.10252	1.09618	1.09467	1.022	0.927	0.935	0.961333	1.24745	0.550511	0.865088	0.887682	0.529884	0.884476	0.773193	0.729184	1.62667	0.8	1.28	1.23556	1.26897	1.22759	1.04828	1.18161	0.939389	0.968108	0.964362	0.957286	1.06957	1.0863	0.876572	1.01081	0.905079	0.607152	0.652655	0.721629	0.621191	0.503466	0.322664	0.48244
Felbamate		1.221	1.324	1.184	1.243	0.953	1.394	0.946	1.09767	1.07578	1.06951	1.03315	1.05948	0.885	0.982	0.953	0.94	0.958071	0.667825	0.812514	0.812803	1.0344	0.88571	0.764633	0.894913	1.2	0.906667	0.986667	1.03111	1.08966	1.36552	0.8	1.08506	0.858644	1.03158	1.14822	1.01282	0.936586	0.962491	0.991203	0.963427	1.20418	0.800978	0.431224	0.812129	0.804416	0.693671	0.688706	0.728931
Digoxin		0.241	0.278	0.286	0.268333	0.304	0.291	0.275	0.29	0.947406	0.989904	1.0028	0.980036	1.097	1.072	1.079	1.08267	0.323267	0.0934173	0.545297	0.32066	0.123082	0.085679	0.0906918	0.0998175	0.08	0.0266667	0.16	0.0888889	0.0413793	0.0275862	0.0275862	0.0321839	0.743146	2.12944	0.527548	1.13338	0.549625	0.691996	0.484754	0.575458	0.2059	0.105738	0.653197	0.321612	0.00294179	0.00355905	0.00327514	0.00325866
Pinacidil monohydrate		1.028	1.037	1.072	1.04567	1.186	0.925	1.779	1.29667	1.03918	1.024	1.06397	1.04239	1.006	0.991	1.008	1.00167	0.986313	0.927656	1.50337	1.13911	0.967919	1.05159	0.820236	0.946582	1.04	0.986667	1.65333	1.22667	1.26897	1.07586	1.61379	1.31954	0.994953	0.966131	0.877478	0.946187	1.05435	0.937018	0.924389	0.971918	1.45463	1.26472	1.40192	1.37376	0.796543	1.21128	1.19164	1.06649
Rutin		1.07	1.205	1.347	1.20733	1.208	0.665	0.589	0.820667	1.07101	1.06534	1.07523	1.07053	1.131	1.047	1.037	1.07167	1.1423	2.26635	1.02368	1.47744	0.443896	0.675484	0.381353	0.500244	1.25333		1.41333	1.33333	0.593103	0.496552	0.248276	0.445977	1.01441	0.917538	1.00484	0.978929	0.873442	0.85779	0.748772	0.826668	0.597826	1.55896	1.41066	1.18915	0.313306	0.27822	0.211369	0.267632
Naftopidil		0.887	0.892	0.823	0.867333	0.214	0.141	0.17	0.175	1.04013	1.03865	0.983541	1.02077	0.808	0.992	0.776	0.858667	0.674343	0.582663	0.695199	0.650735	0.350505	0	0.293823	0.214776	0.613333	0.533333	0.586667	0.577778	0.0827586	0	0.0551724	0.045977	0.868737	0.979554	0.691639	0.846643	0.935291	0	0.437045	0.457445	0.653983	0.933425	0.798451	0.795286	0.1465	0.00152151	0.0877981	0.0786066
CCPA		1.199	1.256	1.402	1.28567	1.537	1.635	1.239	1.47033	1.03444	1.05676	1.05642	1.0492	0.994	0.993	0.975	0.987333	0.47708	0.786878	0.945905	0.736621	0.51955	0.724686	0.503355	0.58253	0.586667	1.01333	1.36	0.986667	0.882759	1.31034	0.689655	0.96092	1.0604	0.89371	0.963425	0.972513	0.978466	0.846457	0.944681	0.923201	0.636849	0.597978	0.864979	0.699935	0.397545	0.701504	0.443172	0.514074
Oxaprozin		1.233	1.246	1.16	1.213	1.181	1.16	1.05	1.13033	1.0953	1.08773	1.07219	1.08507	0.964	1.032	1.058	1.018	1.37085	1.10624	1.05366	1.17691	0.929668	0.882008	0.522866	0.778181	1.73333	1.41333	1.25333	1.46667	1.21379	1.13103	0.606897	0.983908	0.963425	1.01119	0.964154	0.979588	0.930973	1.04053	1.02078	0.997427	2.03588	1.44085	1.4697	1.64881	0.66569	0.781565	1.62653	1.0246
Corticosterone		1.335	1.375	1.366	1.35867	1.013	0.768	0.867	0.882667	1.10408	1.08848	1.11075	1.1011	0.908	0.833	0.843	0.861333	1.36389	0.94547	1.42733	1.24556	1.50297	1.67224	1.42438	1.5332	1.86667	1.33333	2	1.73333	1.68276	1.42069	1.36552	1.48966	0.991312	0.789345	0.80797	0.862876	1.0822	0.923417	0.86934	0.958318	2.9393	2.83488	2.57589	2.78336	0.644732	1.71945	1.02152	1.12857
CGS 12066B dimaleate		0.529	0.521	0.381	0.477	0.222	0.22	0.29	0.244	1.05621	0.998242	0.985575	1.01334	0.945	0.899	0.964	0.936	0.688247	0.798175	1.9131	1.13317	0.844374	0.737179	0.517005	0.699519	0.373333	0.426667	0.746667	0.515556	0.206897	0.17931	0.165517	0.183908	0.652307	0.583424	0.542011	0.592581	0.513897	0.445356	0.509256	0.489503	0.230425	0.18396	0.271576	0.228654	0.0189681	0.040165	0.0132723	0.0241351
Edrophonium chloride		1.198	1.301	1.313	1.27067	0.657	0.764	0.616	0.679	0.984944	1.0488	1.06094	1.03156	0.815	0.95	0.963	0.909333	0.564415	1.09928	0.911145	0.858281	1.19665	0.865967	1.23467	1.0991	0.693333	1.46667	1.22667	1.12889	0.868966	0.731034	0.841379	0.813793	1.04105	0.843869	0.871547	0.918821	0.912408	1.1516	0.977387	1.0138	1.01718	1.50819	2.15803	1.56113	0.378316	0.840827	0.782874	0.667339
Etoposide		0.9	0.564	0.454	0.639333	0.49	0.503	0.267	0.42	1.02402	0.9836	0.960323	0.989313	0.791	0.925	0.937	0.884333	0.86726	1.61416	1.14664	1.20936	1.17082	0.495951	0.607619	0.75813	0.8	0.933333	0.533333	0.755556	0.634483	0.275862	0.17931	0.363218	0.8498	0.859685	1.12346	0.944314	0.946516	1.0251	0.872794	0.948135	0.660943	0.164897	0.292118	0.372653	0.831813	0.412121	0.835104	0.693012
Letrozole		1.39	1.262	1.445	1.36567	1.401	1.071	1.066	1.17933	1.09106	1.07601	1.08989	1.08565	1.047	0.994	0.997	1.01267	0.505323	0.618292	0.305887	0.476501	0.845994	0.955271	0.95959	0.920285	0.72	0.8	0.453333	0.657778	1.31034	1.13103	1.13103	1.1908	0.828469	1.14479	0.908694	0.960651	0.980949	1.00016	0.974041	0.98505	0.737275	0.697327	0.693185	0.709262	0.412035	0.582958	0.559508	0.518167
Atracurium besylate		0.046	0.028	0.032	0.0353333	0.309	0.065	0.113	0.162333	0.957707	1.03428	0.881049	0.957679	1.036	0.929	0.891	0.952	16.9285	10.3902	5.63241	10.9837	0.444127	0.771188	1.32205	0.845788	0.8	0.293333	0.186667	0.426667	0.151724	0.0551724	0.165517	0.124138	0.417668	0.397898	0.392487	0.402685	0.413838	0.412543	0.383183	0.403188	0.00445128	0.00358563	0.00621599	0.00475097	0.000612116	0.000638907	0.000597186	0.00061607
Repaglinide		1.14	1.342	1.497	1.32633	1.93	1.893	1.86	1.89433	1.01771	1.08866	1.11095	1.07244	1.006	0.983	1.032	1.007	0.684336	0.910276	1.12926	0.907959	0.47189	0.342716	0.449294	0.4213	0.8	1.25333	1.73333	1.26222	1.0069	0.717241	0.924138	0.882759	1.09214	1.07289	0.947401	1.03748	0.863619	1.02153	0.998759	0.961304	1.65418	1.38008	1.71085	1.5817	0.417176	0.589019	0.571457	0.525884
Clomifene citrate		0.102	0.042	0.044	0.0626667	0.125	0.165	0.027	0.105667	1.07117	1.10446	1.10905	1.09489	1.043	1.011	0.917	0.990333	0.254182	1.24136	0.587008	0.694185	0	0	0	0	0.0266667	0.0533333	0.0266667	0.0355556	0	0	0	0	0.389678	1.71875	1.20837	1.1056	0	0	0	0	0.00489745	0.00141026	0.00507639	0.0037947	0.000812487	0.000848923	0.00120687	0.000956094
Fluphenazine dihydrochloride		0.08	0.025	0.121	0.0753333	0.036	0.1	0.084	0.0733333	1.0119	0.899318	1.10698	1.00606	0.872	0.909	0.968	0.916333	0.324136	3.17923	0.860308	1.45456	0	0.124393	0	0.0414642	0.0266667	0.08	0.106667	0.0711111	0	0.0137931	0	0.0045977	0.482909	0.453254	0.444306	0.460156	0	0.378434	0	0.126145	0.0375981	0.00333155	0.0430002	0.0279766	0.000476786	0.000440513	0.00055453	0.000490609
Nimetazepam		1.226	1.399	1.165	1.26333	0.851	0.639	0.789	0.759667	1.03784	1.06732	1.02623	1.0438	0.925	0.838	0.958	0.907	0.679122	0.687812	0.736911	0.701282	1.3195	1.24956	1.05884	1.2093	0.853333	0.986667	0.88	0.906667	1.24138	0.882759	0.924138	1.01609	0.968628	0.945945	0.947505	0.954026	0.955799	0.920179	0.881537	0.919172	1.00968	1.03268	0.713214	0.918524	0.821623	0.617454	0.779813	0.73963
3-Pyridinemethanol		1.276	1.356	1.436	1.356	1.121	1.349	1.113	1.19433	1.04157	1.08859	1.09571	1.07529	0.839	0.965	0.953	0.919	0.672605	0.844232	0.796872	0.771236	1.02383	0.887715	1.1321	1.01455	0.88	1.17333	1.17333	1.07556	1.26897	1.32414	1.3931	1.32874	1.20275	0.947401	1.02232	1.05749	0.912947	0.953748	1.08025	0.982316	1.26646	0.907256	1.77868	1.31747	1.09546	0.73761	1.40246	1.07851
Ursodeoxycholic acid		1.422	1.31	1.279	1.337	0.922	0.933	1.153	1.00267	1.08779	1.08455	1.07031	1.08088	0.976	0.922	1.046	0.981333	1.07886	1.0919	0.813383	0.994714	1.00116	1.09594	0.692219	0.92977	1.57333	1.46667	1.06667	1.36889	1.02069	1.13103	0.882759	1.01149	0.967379	0.923781	0.926591	0.93925	1.00944	1.04485	1.06028	1.03819	1.76517	0.353242	0.746584	0.955	0.805803	1.02954	1.13505	0.990129
Tetracycline		1.558	1.478	1.607	1.54767	2.687	2.329	2.48	2.49867	1.09487	1.05844	1.07291	1.07541	1.15	1.101	1.078	1.10967	0.333695	0.281556	0.372366	0.329206	0.181075	0.257037	0.256574	0.231562	0.533333	0.426667	0.613333	0.524444	0.537931	0.662069	0.703448	0.634483	0.963634	0.942511	1.00182	0.969322	0.900103	0.985374	1.03816	0.974544	0.73842	0.899674	0.450429	0.696174	0.270693	0.252135	0.583215	0.368681
Cefixime trihydrate		1.408	1.342	1.034	1.26133	0.586	0.556	0.89	0.677333	1.15908	1.15811	1.16464	1.16061	1.149	1.126	1.157	1.144	0.203346	0.232457	0.251575	0.229126	0.617799	0.941544	0.574921	0.711421	0.293333	0.32	0.266667	0.293333	0.4	0.57931	0.565517	0.514943	0.707872	0.664378	0.864263	0.745504	0.788278	0.808247	0.750499	0.782341	0.30303	0.0708004	0.0641687	0.146	0.319621	0.313781	0.266427	0.299943
RU-486		0.904	0.766	0.815	0.828333	1.368	0.977	0.948	1.09767	1.03277	0.95804	0.983327	0.991379	0.972	0.933	0.962	0.955667	1.12144	1.12014	0.765588	1.00239	0.774813	1.08529	0.802807	0.887638	1.04	0.88	0.64	0.853333	1.17241	1.17241	0.841379	1.06207	1.13324	1.03335	0.777587	0.981392	0.943818	0.992714	0.947596	0.961376	1.81922	2.04034	1.63146	1.83034	0.442667	1.39619	1.05174	0.963534
3'-Deoxydenosine		1.012	1.101	1.175	1.096	1.174	1.047	0.851	1.024	0.982625	1.06142	1.0265	1.02352	0.976	0.969	1.055	1	0.411036	0.590484	0.707799	0.569773	1.05159	0.858178	0.879695	0.929822	0.426667	0.666667	0.853333	0.648889	1.36552	0.993103	0.827586	1.06207	0.990271	0.86572	0.914417	0.923469	0.976415	0.971882	0.874629	0.940975	1.24042	1.29365	0.940534	1.1582	0.831479	2.32253	1.18788	1.4473
Ibuprofen	14	1.063	0.914	0.705	0.894	1.753	1.024	1.337	1.37133	0.950382	0.952718	0.933178	0.945426	1.042	1.004	1.011	1.019	0.669475	0.724008	1.11372	0.835735	0.535461	0.826865	1.04771	0.803344	0.734177	0.683544	0.810127	0.742616	1.00826	0.909091	1.50413	1.1405	1.16444	1.10022	1.03188	1.09885	1.00021	0.847676	1.06732	0.971734	0.574411	1.71345	0.884812	1.05756	0.948536	0.576749	0.171761	0.565682
Estrone 3-sulfate sodium salt		1.022	1.185	1.23	1.14567	1.499	1.436	1.323	1.41933	1.04116	1.01059	1.01911	1.02362	0.999	0.933	0.957	0.963	0.672135	0.621148	0.797606	0.696963	0.893176	1.01847	1.25671	1.05612	0.708861	0.759494	1.01266	0.827004	1.43802	1.57025	1.78512	1.5978	1.12262	0.985699	1.27908	1.12913	1.01644	0.966918	1.03497	1.00611	0.380253	0.957884	1.48899	0.942375	0.879187	0.823023	1.05449	0.918899
Mestranol		1.067	1.296	1.255	1.206	0.953	1.005	0.988	0.982	0.982566	1.04216	1.04687	1.02386	0.963	1.038	1.001	1.00067	0.896919	0.530259	0.606074	0.677751	1.50168	1.20989	1.15221	1.28793	0.987342	0.708861	0.78481	0.827004	1.53719	1.30579	1.22314	1.35537	0.920912	1.00098	1.04968	0.990523	1.11212	0.959799	1.01183	1.02792	1.22967	1.05929	1.30801	1.19899	2.20832	3.16985	1.40665	2.26161
Zucapsaicin		0.93	0.716	0.89	0.845333	2.445	1.344	0.868	1.55233	1.01248	1.01091	1.01713	1.01351	1.086	0.997	1.067	1.05	0.923077	1.47196	0.882288	1.09244	0.522382	0.721512	0.620279	0.621391	0.886076	1.08861	0.810127	0.92827	1.3719	1.04132	0.578512	0.997245	0.937568	0.864166	1.20694	1.00289	0.962521	0.886097	0.824016	0.890878	0.24845	0.835817	0.628704	0.57099	0.585432	0.376499	0.896579	0.619503
Zacopride hydrochloride hydrate		1.113	1.214	1.255	1.194	1.612	1.626	1.443	1.56033	1.03428	1.06181	1.04081	1.04563	1.047	0.972	0.962	0.993667	0.727555	0.404345	0.840612	0.657504	0.696923	0.899062	0.768139	0.788041	0.835443	0.506329	1.08861	0.810127	1.20661	1.57025	1.19008	1.32231	0.996611	1.02096	0.928838	0.982138	0.883061	1.02062	0.87165	0.925112	0.608299	0.447693	0.986455	0.680816	0.628237	1.08269	0.956784	0.889237
Deferiprone		1.014	1.394	1.24	1.216	1.925	1.553	1.603	1.69367	1.01974	1.06941	1.01814	1.03576	1.005	0.962	0.986	0.984333	1.11284	0.827311	0.830415	0.92352	0.687506	0.673773	0.672204	0.677828	1.16456	1.18987	1.06329	1.13924	1.42149	1.12397	1.15702	1.23416	1.06278	1.29792	1.18753	1.18274	0.965662	0.954355	0.924204	0.948074	0.645907	0.611906	1.38127	0.879693	0.603172	0.719615	0.767822	0.69687
Bicalutamide		1.154	1.233	1.302	1.22967	2.25	2.095	1.433	1.926	1.02729	1.03538	1.04945	1.03737	0.94	1.031	0.987	0.986	0.658834	0.497451	0.621592	0.592625	0.841382	0.786188	0.826865	0.818145	0.78481	0.632911	0.835443	0.751055	2.03306	1.7686	1.27273	1.69146	1.00592	1.10298	0.961461	1.02345	0.858878	0.899393	0.801612	0.853294	0.706831	0.548698	0.624061	0.62653	0.756108	0.994838	0.851769	0.867572
Crotamiton		0.903	0.901	0.604	0.802667	0.673	0.574	0.998	0.748333	1.04435	1.03981	0.977526	1.02056	0.993	0.947	1.045	0.995	1.46619	1.52516	1.74595	1.5791	1.21185	1.09885	0.879116	1.06327	1.36709	1.41772	1.08861	1.29114	0.876033	0.677686	0.942149	0.831956	1.03268	0.963873	0.941704	0.979419	1.06721	1.19765	0.953936	1.07293	1.03673	0.803712	0.490816	0.777085	0.622656	0.780161	1.0875	0.830105
Aminolevulinic acid		0.783	1.168	1.16	1.037	1.278	1.607	1.44	1.44167	0.983459	1.07156	1.02901	1.02801	1.011	0.937	0.965	0.971	0.814454	0.630016	1.28974	0.911402	0.794886	0.679789	0.950986	0.808554	0.658228	0.759494	1.5443	0.987342	1.09091	1.17355	1.47107	1.24518	0.956751	1.04761	1.02786	1.01074	1.05172	0.85982	0.909443	0.940327	0.798559	0.754848	0.79324	0.782215	0.717843	0.649191	0.523236	0.63009
Ethynylestradiol		1.087	1.074	1.095	1.08533	1.116	1.257	0.932	1.10167	1.04975	1.03446	1.00477	1.02966	0.983	0.938	0.867	0.929333	1.19574	0.684992	1.34338	1.07471	0.938168	0.538861	0.875257	0.784096	1.34177	0.759494	1.51899	1.20675	1.12397	0.727273	0.876033	0.909091	0.959508	0.881052	0.829935	0.890165	0.921587	1.05653	0.948597	0.975572	1.22249	0.762269	1.2696	1.08479	0.773807	0.618959	0.478417	0.623728
Lomerizine dihydrochloride		0.417	0.524	0.531	0.490667	1.054	0.953	1.007	1.00467	0.9324	1.0052	0.980699	0.972765	0.654	0.742	0.814	0.736667	0.529816	0.374196	0.554201	0.486071	0.160547	0.129157	0.0916849	0.127129	0.227848	0.202532	0.303797	0.244726	0.181818	0.132231	0.0991736	0.137741	0.654758	0.543335	0.74654	0.648211	0.453099	0.840871	0.68593	0.659966	0.109284	0.121038	0.46097	0.230431	0.0565387	0.0472855	0.0762542	0.0600261
Cladribine		0.684	0.573	0.626	0.627667	0.666	0.868	1.163	0.899	1.08424	0.998303	1.04204	1.04153	0.946	0.9	1.145	0.997	1.93527	1.88295	1.92064	1.91295	1.10918	1.01017	0.58248	0.900609	1.36709	1.11392	1.24051	1.24051	0.793388	0.942149	0.727273	0.820937	1.20567	0.999253	0.84797	1.01763	0.857726	0.90044	0.829146	0.862437	0.689066	0.80878	0.59621	0.698019	0.376671	0.529991	0.570605	0.492422
Flumazenil		1.101	1.302	1.098	1.167	0.53	0.652	0.835	0.672333	1.0464	1.08303	1.03335	1.05426	0.987	0.898	0.939	0.941333	0.846376	0.583906	1.25161	0.893963	1.54046	1.53458	1.1237	1.39958	0.962025	0.78481	1.41772	1.05485	0.876033	1.07438	1.00826	0.986226	1.02257	0.96238	0.93573	0.973561	0.942839	0.985134	0.946608	0.958194	0.429255	0.735813	0.709775	0.624948	0.561893	1.12578	0.556715	0.74813
Nortriptyline hydrochloride		0.238	0.18	0.125	0.181	0.151	0.186	0.365	0.234	0.948698	0.924004	0.826066	0.899589	1.085	1.182	1.164	1.14367	0.822877	0.136112	0.58834	0.515776	0.204362	0	0.0843606	0.0962408	0.202532	0.0253165	0.0759494	0.101266	0.0330579	0	0.0330579	0.0220386	0.586526	0.455459	0.519097	0.520361	1.71367	0	0.369347	0.69434	0.071055	0.0506148	0.0815125	0.0677274	0.000667674	0.00182506	0.00123454	0.00124242
Levofloxacin		1.12	1.018	1.274	1.13733	1.584	1.134	1.379	1.36567	0.979622	1.01649	1.05678	1.01763	0.96	0.979	1.06	0.999667	0.656617	0.843272	0.635779	0.711889	0.913383	1.0447	0.758853	0.905645	0.759494	0.886076	0.835443	0.827004	1.55372	1.27273	1.12397	1.3168	1.14606	1.03383	0.840963	1.00695	0.958229	0.956135	1.06334	0.992567	0.696807	0.983227	0.787986	0.822673	0.82078	0.917936	0.824244	0.85432
Docetaxel		0.571	0.482	0.483	0.512	0.586	0.685	0.32	0.530333	1.03114	0.981157	1.00496	1.00575	1.049	1.054	1.095	1.066	2.78963	2.38971	2.79317	2.6575	0.604061	0.382042	0.865514	0.617206	1.64557	1.18987	1.39241	1.40928	0.380165	0.280992	0.297521	0.319559	0.941244	1.00994	1.06381	1.005	0.666876	0.833124	0.960113	0.820038	1.74281	1.5225	0.985824	1.41704	0.287695	0.310094	0.295524	0.297771
Mecillinam		1.118	1.259	1.007	1.128	0.803	1.156	1.017	0.992	1.05746	1.06734	1.03967	1.05483	0.97	1.005	1.023	0.999333	1.229	0.448238	1.21747	0.964901	1.18903	1.10545	1.05967	1.11805	1.41772	0.582278	1.26582	1.08861	1.02479	1.3719	1.15702	1.18457	1.11665	0.952846	1.01074	1.02675	0.962312	1.03549	0.941269	0.97969	0.623111	0.92023	1.05893	0.867425	0.65447	1.12216	0.800147	0.858925
Nitrendipine		0.626	0.702	0.544	0.624	0.77	0.546	0.876	0.730667	0.999643	1.00094	0.952122	0.984234	0.969	0.876	0.96	0.935	2.34981	2.0266	2.02749	2.13463	0.919923	1.12749	0.650427	0.89928	1.51899	1.46835	1.13924	1.37553	0.760331	0.661157	0.61157	0.677686	1.08587	1.06588	0.845098	0.998947	0.97121	1.1496	0.953727	1.02485	2.96378	1.45407	1.7535	2.05711	1.20574	0.191591	0.644298	0.680543
Racecadotril		0.996	1.112	1.257	1.12167	1.327	2.363	1.831	1.84033	0.972361	1.01029	1.02889	1.00385	0.911	0.929	0.982	0.940667	0.541787	0.816227	0.468189	0.608734	0.533368	1.218	0.756499	0.835955	0.556962	0.936709	0.607595	0.700422	0.760331	3.09091	1.4876	1.77961	0.977773	0.993969	1.13021	1.03398	0.877094	0.944828	0.938442	0.920121	0.345949	0.756756	0.417168	0.506625	0.426351	1.2872	0.46043	0.72466
Sulfisoxazole		1.24	1.181	1.246	1.22233	1.127	0.838	0.48	0.815	1.06258	1.03263	1.04871	1.04797	1.041	0.989	1.015	1.015	1.02815	0.97628	1.35846	1.12096	0.832816	1.17569	1.25024	1.08625	1.31646	1.18987	1.74684	1.41772	1.00826	1.05785	0.644628	0.903581	0.892539	1.02751	1.10436	1.00814	0.876047	0.956658	0.899916	0.910874	0.791545	1.1825	0.832603	0.93555	0.44992	0.440247	0.588413	0.49286
Doxylamine succinate		1.302	1.114	1.35	1.25533	0.692	0.781	1.226	0.899667	1.0855	1.03842	1.05944	1.06112	0.94	0.981	0.935	0.952	0.696963	0.858346	0.999335	0.851548	1.15666	1.24095	1.1422	1.17994	0.936709	0.987342	1.39241	1.10549	0.859504	1.04132	1.50413	1.13499	0.877606	1.15961	1.04991	1.02904	0.911223	0.917818	0.854899	0.894647	0.769844	1.04945	1.07213	0.96381	0.840348	1.45736	0.983591	1.09377
Vincristine sulfate		0.713	0.626	0.525	0.621333	1.556	1.412	1.445	1.471	1.04494	1.02585	1.01741	1.0294	0.943	0.947	0.925	0.938333	1.10086	1.84261	0.841055	1.26151	1.24657	0.915541	0.734918	0.965678	0.810127	1.18987	0.455696	0.818565	2.08264	1.38843	1.1405	1.53719	0.879904	0.961346	0.911148	0.917466	1.05339	1.04198	0.998534	1.0313	5.20122	4.43375	2.98806	4.20768	1.56467	0.56389	1.1579	1.09549
Doxapram hydrochloride		1.094	1.138	1.254	1.162	2.019	1.261	1.864	1.71467	1.02895	1.01672	1.04632	1.03066	1.019	0.918	1.041	0.992667	0.717358	0.775881	0.528043	0.67376	0.640225	0.646634	0.825687	0.704182	0.810127	0.911392	0.683544	0.801688	1.38843	0.876033	1.65289	1.30579	1.05588	1.42519	0.978692	1.15326	0.90358	1.0134	1.00314	0.973374	0.765744	0.629964	0.518718	0.638142	0.626427	0.621906	0.68394	0.644091
Piroxicam		0.487	0.407	0.474	0.456	0.8	0.355	0.341	0.498667	1.00624	0.986391	0.994145	0.995592	1.047	0.936	1.036	1.00633	3.22057	3.92108	2.58967	3.24377	0.750155	0.952817	1.35304	1.01867	1.62025	1.64557	1.26582	1.51055	0.644628	0.363636	0.495868	0.501377	1.03716	0.952846	0.938487	0.976164	0.864845	0.898032	0.788317	0.850398	1.12257	2.05891	1.07512	1.41886	0.594919	0.43175	0.112468	0.379713
Azithromycin		1.056	1.022	1.037	1.03833	1.791	1.906	2.111	1.936	0.989953	1.02076	1.01767	1.00946	0.907	0.894	0.967	0.922667	0.626912	0.479716	0.756817	0.621148	0.816401	0.403688	0.583265	0.601118	0.683544	0.506329	0.810127	0.666667	1.57025	0.826446	1.32231	1.23967	1.06312	1.06438	0.918615	1.01537	1.06962	0.877198	0.915096	0.953971	0.380371	0.542701	0.596147	0.506406	0.233762	0.241833	0.20107	0.225555
Halometasone monohydrate		0.991	1.007	0.897	0.965	2.448	2.05	2.518	2.33867	1.06541	1.02703	1.02523	1.03922	0.936	0.913	0.943	0.930667	0.841499	1.19353	0.656617	0.897214	0.603669	0.533107	0.519504	0.552093	0.860759	1.24051	0.607595	0.902954	1.58678	1.17355	1.40496	1.38843	0.848774	0.875309	0.875309	0.866464	0.929962	0.86317	1.0045	0.932545	3.17298	3.78218	3.08858	3.34791	1.57165	1.63063	1.50931	1.57053
Tizanidine hydrochloride		1.07	1.095	0.995	1.05333	2.537	1.445	0.8	1.594	1.03755	1.04643	1.0275	1.03716	1.017	0.976	0.835	0.942667	0.91687	1.54511	0.739969	1.06732	0.679462	1.02246	1.82722	1.17638	1.01266	1.74684	0.759494	1.173	1.85124	1.58678	1.57025	1.66942	1.26449	1.07001	1.1325	1.15567	1.04826	0.91562	1.01832	0.994068	0.735654	1.0945	0.969668	0.933275	0.385599	1.01533	0.576898	0.659274
Medrysone		1.188	1.022	0.997	1.069	2.106	1.579	1.76	1.815	1.0531	1.01946	1.04619	1.03958	0.952	0.91	0.996	0.952667	1.07338	1.05609	1.5256	1.21836	1.25678	1.51064	1.31138	1.3596	1.31646	1.11392	1.56962	1.33333	2.84298	2.56198	2.47934	2.6281	0.952157	0.925622	1.06048	0.979419	1.00806	1.00188	0.965976	0.991974	5.09939	4.98751	3.7152	4.6007	2.10303	1.60527	1.81288	1.84039
Ethacrynic acid	15	0.613	0.93	0.813	0.785333	0.698	0.402	0.429	0.509667	0.912003	1.01126	0.96415	0.962472	0.935	0.836	0.821	0.864	2.14166	1.70173	1.85296	1.89878	0.911615	1.13857	1.42358	1.15792	1.17241	1.41379	1.34483	1.31034	0.657895	0.473684	0.631579	0.587719	0.908942	1.03321	0.862955	0.935037	0.91032	0.851332	0.779234	0.846962	1.80451	0.687784	1.1278	1.2067	1.10021	0.727858	0.822971	0.883678
Verapamil hydrochloride		0.776	0.988	0.815	0.859667	0.82	0.526	0.582	0.642667	0.961741	1.0276	1.01769	1.00235	0.864	0.878	0.906	0.882667	1.88942	1.83742	1.75254	1.82646	1.02426	1.03967	0.940776	1.00157	1.31034	1.62069	1.27586	1.4023	0.868421	0.565789	0.565789	0.666667	0.892745	0.84001	0.828633	0.853796	0.957033	0.830316	0.940595	0.909315	1.3121	0.857049	1.3202	1.16312	0.702832	0.677643	1.06104	0.813838
Idebenone		0.614	0.806	0.692	0.704	0.608	0.482	0.557	0.549	1.027	0.954418	0.957541	0.979653	0.955	0.818	0.806	0.859667	1.00658	0.766288	1.11536	0.962742	0.941377	0.633012	0.639885	0.738091	0.551724	0.551724	0.689655	0.597701	0.592105	0.315789	0.368421	0.425439	0.84724	0.841649	0.725187	0.804692	0.729505	0.725551	0.847586	0.767548	0.403839	0.671063	0.802699	0.625867	0.667811	0.301448	0.396443	0.455234
Anastrozole		1.324	1.392	1.084	1.26667	0.707	0.871	1.053	0.877	1.06818	1.09371	1.04178	1.06789	0.919	0.937	0.978	0.944667	1.13688	1.35864	0.676629	1.05738	1.02526	1.27036	0.918755	1.07146	1.34483	1.68966	0.655172	1.22989	0.75	1.14474	1	0.964912	0.912798	0.83866	0.729043	0.826834	0.848835	0.985747	0.961402	0.931995	1.00654	1.2218	1.3193	1.18255	0.864871	0.781879	1.08237	0.909708
Methazolamide		1.137	1.409	1.327	1.291	0.637	0.873	0.759	0.756333	1.00977	1.084	1.05431	1.04936	0.831	0.932	0.887	0.883333	0.67902	1.23252	0.786013	0.899183	1.11881	1.09279	1.17367	1.12842	0.689655	1.55172	0.931034	1.05747	0.736842	0.986842	0.921053	0.881579	0.856688	0.874235	0.787178	0.839367	0.999064	0.981273	0.968581	0.982973	0.744966	1.13113	0.822592	0.899563	0.534967	1.04353	0.270772	0.616423
Prednisolone		1.169	1.251	1.172	1.19733	1.611	1.512	1.171	1.43133	1.03193	1.05238	1.04708	1.0438	0.838	0.888	0.833	0.853	2.31142	2.77705	2.37119	2.48655	1.29512	1.08552	1.21724	1.19929	2.41379	3.10345	2.48276	2.66667	2.15789	1.69737	1.47368	1.77632	0.931309	0.906532	0.795854	0.877898	0.970558	0.833645	1.02268	0.942294	4.84694	4.20311	6.39722	5.14909	3.4094	3.70605	5.00769	4.04105
Prednisone		1.318	1.228	1.071	1.20567	1.743	0.713	1.018	1.158	1.0841	1.05702	1.06966	1.07026	1.121	0.846	0.916	0.961	1.14286	1.66647	1.83742	1.54891	0.708218	1.07057	1.21217	0.996986	1.34483	1.82759	1.75862	1.64368	1.27632	0.789474	1.27632	1.11404	0.815522	0.839431	1.0765	0.910484	0.975031	0.835206	0.929151	0.913129	0.850228	1.30838	1.57232	1.24364	1.07754	1.09916	1.14395	1.10688
L-Thyroxine		1.159	0.978	0.904	1.01367	0.45	0.49	0.441	0.460333	1.06946	1.05468	0.982925	1.03569	0.877	0.805	0.774	0.818667	1.53258	2.32756	1.11058	1.6569	1.18761	1.32421	1.12662	1.21282	1.58621	2.03448	0.896552	1.50575	0.552632	0.671053	0.513158	0.578947	1.01644	1.07852	0.88349	0.992818	0.967124	0.843217	0.805452	0.871931	0.949004	0.318344	1.60408	0.957144	0.397658	0.317158	0.341802	0.352206
Mevastatin		0.636	0.663	0.672	0.657	0.463	0.523	0.578	0.521333	0.970844	1.08896	1.04885	1.03622	0.808	0.816	0.741	0.788333	2.85236	3.90317	2.87089	3.20881	1.4829	1.07157	0.969003	1.17449	1.62069	2.31034	1.72414	1.88506	0.710526	0.578947	0.578947	0.622807	0.84001	0.823331	0.824873	0.829405	0.892114	0.902622	0.839471	0.878069	0.48207	0.151695	0.382497	0.338754	0.332592	0.507416	0.370016	0.403341
Fluvastatin		0.64	0.766	0.865	0.757	0.414	0.524	0.423	0.453667	1.04315	1.05229	1.07407	1.0565	0.732	0.74	0.763	0.745	2.23192	3.07412	2.00717	2.43774	0.984085	1.31033	1.11221	1.13554	1.27586	2.10345	1.55172	1.64368	0.421053	0.710526	0.486842	0.539474	0.757484	0.967944	0.97556	0.900329	0.907199	1.0798	0.825218	0.937405	0.523404	0.470741	0.250228	0.414791	0.367588	0.547154	0.854375	0.589706
Zonisamide		1.099	1.154	1.09	1.11433	1.358	1.201	0.776	1.11167	1.03471	1.08314	1.05272	1.05686	1.003	0.991	0.916	0.97	1.72206	2.20741	1.59354	1.841	1.08718	1.22872	1.18047	1.16546	1.68966	2.27586	1.55172	1.83908	1.52632	1.52632	0.947368	1.33333	0.870475	0.992046	0.815715	0.892745	1.11069	1.05098	0.872139	1.01127	1.11431	1.21393	1.22297	1.18374	0.638502	1.38454	0.689088	0.904041
Ipratropium bromide		0.725	1.16	0.764	0.883	0.976	0.585	1.264	0.941667	0.994715	1.07771	0.979233	1.01722	0.907	0.877	0.88	0.888	2.71668	2.36282	2.22295	2.43415	1.35551	1.0651	0.966267	1.12896	1.75862	2.44828	1.51724	1.90805	1.36842	0.644737	1.26316	1.09211	0.879344	0.898433	0.984526	0.920768	0.942572	1.04775	0.938722	0.976349	1.46858	1.68269	0.784745	1.312	0.793799	0.465346	1.176	0.811715
Carbidopa		1.099	1.081	1.112	1.09733	0.839	0.755	1.819	1.13767	1.03055	1.04056	1.02129	1.0308	0.877	0.858	0.958	0.897667	1.40466	1.67842	1.66707	1.58338	0.955457	0.792032	1.19616	0.981215	1.37931	1.62069	1.65517	1.55172	0.828947	0.618421	2.25	1.23246	0.794601	0.803085	0.910292	0.835993	0.887536	0.907199	0.97035	0.921695	0.556466	0.981626	0.800392	0.779495	1.05227	0.786272	1.33121	1.05658
Azathioprine		0.804	0.718	0.845	0.789	1.72	1.148	1.26	1.376	0.957686	0.947906	1.0328	0.979463	0.969	0.91	1.069	0.982667	2.01614	2.4746	1.5535	2.01474	0.702813	1.10847	1.01965	0.943646	1.44828	1.58621	1.17241	1.4023	1.25	1.31579	1.32895	1.29825	0.910774	0.891974	0.917522	0.906757	0.90387	1.03766	0.997087	0.979539	1.07597	0.885999	0.713507	0.891827	0.858579	1.54321	2.05309	1.48496
Methylprednisolone		1.15	0.958	1.135	1.081	1.873	1.466	1.236	1.525	1.09086	1.06529	1.09681	1.08432	0.958	0.887	0.969	0.938	2.55051	2.73879	3.33413	2.87448	1.18922	1.68349	1.60649	1.49307	2.62069	2.34483	3.37931	2.78161	2.30263	2.55263	2.05263	2.30263	0.836635	0.850133	0.874042	0.853603	0.92655	0.911569	0.861527	0.899882	5.52626	6.62085	5.64603	5.93105	3.24237	2.21192	3.78309	3.07913
Raloxifene hydrochloride		0.4	0.47	0.352	0.407333	0.629	0.593	0.572	0.598	0.985963	1.01428	0.948402	0.982881	0.802	0.76	0.776	0.779333	2.31381	3.12014	1.75493	2.39629	0.586434	0.429148	0.600581	0.538721	0.827586	1.31034	0.551724	0.896552	0.381579	0.263158	0.355263	0.333333	0.820824	0.755652	0.877416	0.817964	0.932688	0.752185	0.786933	0.823935	1.57957	2.61037	2.75927	2.3164	0.229863	0.121887	0.223913	0.191887
Medroxyprogesterone 17-acetate		1.275	1.312	1.321	1.30267	1.384	1.562	1.817	1.58767	1.07435	1.05322	1.04237	1.05665	0.838	0.866	0.889	0.864333	1.36282	1.79438	1.8416	1.66627	1.28684	1.53181	1.35144	1.39003	1.55172	2.10345	2.17241	1.94253	1.84211	2.47368	2.53947	2.28509	1.01056	0.946831	1.00689	0.988094	0.901477	0.920204	0.926758	0.916146	1.34311	2.00582	1.45731	1.60208	1.40639	1.48581	1.92177	1.60466
Ethionamide		1	0.9	1.098	0.999333	1.383	0.881	1.266	1.17667	0.9948	1.03495	1.0339	1.02122	0.943	0.967	1.027	0.979	1.27316	1.54453	1.47699	1.43156	0.994094	0.924427	0.944713	0.954411	1.13793	1.24138	1.44828	1.27586	1.42105	0.842105	1.23684	1.16667	0.830465	0.817643	0.952133	0.866747	0.965044	0.955993	0.993758	0.971598	1.50363	0.502029	0.898979	0.968212	1.10732	0.645743	1.36842	1.04049
Cyproheptadine hydrochloride		0.553	0.702	0.778	0.677667	0.206	0.326	0.231	0.254333	1.02382	0.98888	0.996519	1.00307	0.621	0.791	0.739	0.717	1.32696	2.03467	2.23192	1.86451	0.370758	1.17073	0.992693	0.844728	0.655172	1.27586	1.55172	1.16092	0.0789474	0.394737	0.236842	0.236842	0.768571	0.728561	0.733189	0.74344	0.664586	0.834478	0.743134	0.747399	1.15441	1.07317	0.933542	1.05371	0.153306	0.17519	0.155831	0.161442
Thiabendazole		1.153	1.055	1.055	1.08767	1.18	0.805	1.177	1.054	1.05384	1.08677	0.982913	1.04117	0.969	0.836	0.94	0.915	1.50687	2.19486	1.24447	1.64873	1.29365	1.21758	1.37353	1.29492	1.55172	2.06897	1.17241	1.5977	1.57895	1.01316	1.67105	1.42105	0.784478	0.89853	0.881658	0.854889	0.961506	0.92499	0.983874	0.95679	2.27301	2.0497	2.50788	2.27687	0.940632	0.905331	1.69729	1.18109
Methylprednisolone acetate		0.93	1.372	1.184	1.162	1.829	0.946	1.657	1.47733	1.00453	1.05896	1.07642	1.04664	0.923	0.773	0.899	0.865	1.66049	1.91273	1.53258	1.70193	1.14811	1.38574	1.29011	1.27465	1.37931	2.34483	1.62069	1.78161	2.17105	1.35526	2.21053	1.91228	0.955604	0.809159	0.829308	0.86469	0.914482	0.927799	0.899293	0.913858	3.52702	5.03042	5.8544	4.80395	2.44576	2.70064	1.71372	2.28671
Miglitol		1.117	1.102	1.084	1.101	1.02	1.178	1.007	1.06833	1.06207	1.07504	1.0525	1.0632	0.98	1.005	1.047	1.01067	1.24447	1.71608	1.17573	1.37876	1.11014	0.993427	1.09953	1.0677	1.24138	1.68966	1.13793	1.35632	1.17105	1.21053	1.14474	1.17544	0.781779	0.89718	1.07052	0.916494	0.938514	0.971182	0.974511	0.961402	1.41881	0.48038	1.67598	1.19172	0.590227	0.926762	1.71496	1.07732
Prilocaine hydrochloride		1.29	1.269	1.122	1.227	1.352	1.478	1.148	1.326	1.08016	1.06694	1.04045	1.06252	1.048	1.047	1.047	1.04733	1.3168	1.15601	1.82367	1.43216	0.894131	0.990224	1.23046	1.03827	1.51724	1.31034	1.82759	1.55172	1.25	1.51316	1.46053	1.40789	0.819378	0.867004	1.09077	0.925717	1.02871	1.05233	0.868706	0.98325	1.63192	1.29214	1.91172	1.61193	1.34175	1.15282	1.27212	1.25556
Minocycline hydrochloride		1.151	0.882	0.987	1.00667	0.894	0.896	1.15	0.98	1.03523	1.02971	1.04016	1.03503	1.011	1.071	1.053	1.045	1.44232	1.96892	1.21279	1.54134	1.1383	0.894465	1.04027	1.02435	1.48276	1.55172	1.06897	1.36782	1.05263	0.828947	1.23684	1.03947	0.905182	1.04035	0.922054	0.955861	0.934977	1.03506	1.03454	1.00153	1.07958	1.75414	1.86205	1.56525	0.755168	0.702741	0.819441	0.759116
					#DIV/0!	#N/A	#N/A	#N/A	#N/A				#DIV/0!	#N/A	#N/A	#N/A	#N/A				#DIV/0!	#N/A	#N/A	#N/A	#N/A				#DIV/0!	#N/A	#N/A	#N/A	#N/A				#DIV/0!	#N/A	#N/A	#N/A	#N/A				#DIV/0!	#N/A	#N/A	#N/A	#N/A
					#DIV/0!	#N/A	#N/A	#N/A	#N/A				#DIV/0!	#N/A	#N/A	#N/A	#N/A				#DIV/0!	#N/A	#N/A	#N/A	#N/A				#DIV/0!	#N/A	#N/A	#N/A	#N/A				#DIV/0!	#N/A	#N/A	#N/A	#N/A				#DIV/0!	#N/A	#N/A	#N/A	#N/A
					#DIV/0!	#N/A	#N/A	#N/A	#N/A				#DIV/0!	#N/A	#N/A	#N/A	#N/A				#DIV/0!	#N/A	#N/A	#N/A	#N/A				#DIV/0!	#N/A	#N/A	#N/A	#N/A				#DIV/0!	#N/A	#N/A	#N/A	#N/A				#DIV/0!	#N/A	#N/A	#N/A	#N/A
					#DIV/0!	#N/A	#N/A	#N/A	#N/A				#DIV/0!	#N/A	#N/A	#N/A	#N/A				#DIV/0!	#N/A	#N/A	#N/A	#N/A				#DIV/0!	#N/A	#N/A	#N/A	#N/A				#DIV/0!	#N/A	#N/A	#N/A	#N/A				#DIV/0!	#N/A	#N/A	#N/A	#N/A
Enrofloxacin	25	0.881	0.903	0.886	0.89	1.118	1.332	1.126	1.192	0.95242	0.872575	0.925497	0.91683	0.967	0.98	0.973	0.973333	1.12031	1.39319	0.737334	1.08361	0.979956	0.853819	1.04642	0.960066	1.05983	1.35043	0.700855	1.03704	0.995305	1.03286	1.07042	1.03286	1.01555	1.07664	1.04405	1.04541	1.04972	0.884062	0.903627	0.945802	1.91429	0.548168	0.103211	0.855223	0.631449	0.897203	1.12496	0.884537
Dilantin		0.81	1.119	0.752	0.893667	1.273	1.113	0.818	1.068	0.865025	0.916784	0.9095	0.897103	0.984	0.972	0.9	0.952	1.71148	0.769011	1.48249	1.32099	1.02281	1.04043	0.947356	1.00353	1.48718	0.923077	1.19658	1.20228	1.1831	1.05164	0.704225	0.979656	0.996097	1.00142	1.09113	1.02955	0.878844	1.06216	0.99403	0.978344	0.533414	0.891817	0.691361	0.705531	0.914371	0.713009	0.986193	0.871191
Propranolol hydrochloride		1.025	0.821	0.999	0.948333	0.956	0.865	0.739	0.853333	0.938804	0.852152	0.915131	0.902029	0.947	0.904	0.951	0.934	0.94781	1.06765	1.21153	1.07566	0.832853	0.932035	1.10575	0.956879	1.04274	0.940171	1.29915	1.09402	0.723005	0.732394	0.741784	0.732394	0.914813	0.878508	0.913326	0.902216	0.919581	0.933527	0.858677	0.903928	0.651781	5.04677	1.37667	2.35841	0.28415	0.351687	0.390429	0.342088
Nitazoxanide		1.251	1.182	1.263	1.232	2.039	1.916	1.935	1.96333	0.931674	0.943749	0.950823	0.942082	1.016	0.992	1.024	1.01067	1.36208	1.0915	0.819769	1.09112	0.380256	0.420804	0.320585	0.373882	1.82906	1.38462	1.11111	1.4416	0.704225	0.732394	0.56338	0.666667	1.08011	1.00712	1.10303	1.06342	0.834295	0.944263	0.844429	0.874329	1.66429	0.463029	1.08266	1.06999	1.27676	1.71335	2.3159	1.76867
Acarbose		1.099	1.058	1.105	1.08733	1.079	1.278	1.517	1.29133	0.982775	0.970714	0.992398	0.981962	1.003	0.965	0.999	0.989	1.07223	1.476	0.907929	1.15205	0.795415	1.05967	0.838383	0.897823	1.26496	1.67521	1.07692	1.33903	0.779343	1.23005	1.15493	1.05477	0.904777	1.03463	0.849761	0.929723	1.14494	0.870516	1.02855	1.01467	0.865079	0.923644	0.593326	0.794016	0.836975	0.958708	0.49187	0.762517
Chlorambucil		0.617	0.767	0.598	0.660667	0.524	0.538	0.457	0.506333	0.765779	0.84596	0.744347	0.785362	0.804	0.82	0.849	0.824333	1.62675	0.975861	0.904875	1.16916	1.61744	1.30768	1.26737	1.3975	1.07692	0.803419	0.581197	0.820513	0.769953	0.638498	0.525822	0.644757	1.08568	1.30376	1.23127	1.20691	0.954397	0.965334	0.910249	0.943327	0.349284	0.257901	0.452153	0.353113	0.158469	0.310466	0.469097	0.312677
Nicotinamide		0.969	1.176	1.173	1.106	1.341	1.445	1.147	1.311	0.974874	1.01405	0.99202	0.993649	0.949	0.996	0.92	0.955	1.15046	1.12413	1.29033	1.18831	0.932957	0.794148	0.973505	0.900204	1.19658	1.4188	1.62393	1.41311	1.13615	1.04225	1.01408	1.06416	1.08122	1.13648	1.05718	1.09163	0.878944	0.891386	0.88366	0.884664	0.450237	0.768865	0.172667	0.463923	0.99454	0.788687	0.750998	0.844742
Oxiconazole nitrate		0.396	0.257	0.23	0.294333	0.047	0.047	0.003	0.0323333	0.899456	0.818645	0.928774	0.882292	0.502	0.415	-1.135	-0.0726667	0.321343	0.619597	0.553191	0.498044	0.886073	0.886073	0	0.590715	0.136752	0.17094	0.136752	0.148148	0.0375587	0.0375587	0	0.0250391	0.780373	0.575677	0.453008	0.603019	0.463352	0.353785	0	0.272379	0.00122523	0.00089536	0.000824477	0.000981689	0.00179099	0.0044139	-0.016593	-0.0034627
Isoproterenol hydrochloride		1.423	1.048	1.154	1.20833	1.208	1.187	1.385	1.26	1.00643	0.990031	0.935876	0.977447	1.028	0.956	0.984	0.989333	0.951245	1.42925	1.31075	1.23042	0.864417	1.32347	0.932611	1.04016	1.45299	1.60684	1.62393	1.56125	0.948357	1.42723	1.17371	1.1831	1.01555	0.861409	1.04318	0.97338	1.0164	0.964029	0.945267	0.975234	0.344346	0.911727	0.360793	0.538955	0.955631	0.634852	0.788803	0.793095
Carbamazepine		0.661	1.293	0.939	0.964333	1.377	1.435	1.006	1.27267	0.774674	1.02278	0.91642	0.904625	0.993	0.996	0.924	0.971	1.3493	1.04704	1.23824	1.21153	1.03629	0.958185	1.19203	1.06217	0.957265	1.45299	1.24786	1.21937	1.29577	1.24883	1.0892	1.21127	1.06326	1.03699	1.06722	1.05582	0.873526	1.03707	0.804194	0.904932	0.328804	0.480401	0.368745	0.39265	0.593892	0.657474	0.684987	0.645451
Ketoprofen		1.02	1.068	0.957	1.015	1.627	1.601	1.618	1.61533	1.03282	1.00133	0.991305	1.00849	0.968	0.977	0.971	0.972	1.07738	1.75918	1.21553	1.3507	0.927658	0.904043	0.773068	0.868256	1.17949	2.01709	1.24786	1.48148	1.37089	1.31455	1.13615	1.27387	1.07986	0.926584	0.948144	0.984863	0.923092	0.875834	1.02664	0.941855	0.634166	0.714527	0.556441	0.635045	0.585842	0.726791	0.816492	0.709708
Clomipramine hydrochloride		0.316	0.18	0.154	0.216667	0.086	0.026	0.009	0.0403333	0.959802	0.979245	0.885897	0.941648	0.52	0.587	0.113	0.406667	0.100945	0.265051	0.309512	0.225169	0	0	1.15194	0.38398	0.034188	0.0512821	0.0512821	0.045584	0	0	0.00938967	0.00312989	0.605539	0.471842	0.508643	0.528674	0	0	0.533387	0.177796	0.0010508	0.000126758	0.000687799	0.000621787	0.00252846	0.00250317	0.0189634	0.00799835
Buspirone hydrochloride		1.374	1.516	1.319	1.403	1.668	1.714	1.952	1.778	1.04931	1.06755	1.05591	1.05759	1.034	0.982	0.991	1.00233	0.857933	0.798588	0.942086	0.866202	0.954268	1.06151	0.783896	0.933226	1.26496	1.29915	1.33333	1.29915	1.44601	1.65258	1.38967	1.49609	1.02658	0.877021	1.00911	0.970902	0.926403	0.995535	0.968645	0.963528	0.875926	1.50556	0.784702	1.0554	1.0597	0.958795	0.720919	0.913137
Tamoxifen		0.079	0.047	0.025	0.0503333	0.046	0.096	0.053	0.065	0.575063	0.425235	-0.793781	0.0688391	0.623	0.901	0.962	0.828667	0.401679	1.36304	0	0.588239	0.225896	0.215298	0	0.147064	0.034188	0.0683761	0	0.034188	0.00938967	0.0187793	0	0.00938967	0.441361	1.15904	0	0.533466	0.346661	0.469874	0	0.272178	0.00073718	0.000893396	0.00101616	0.000882246	0.000545916	0.000696946	0.000901232	0.000714698
Doxepin hydrochloride		0.825	0.845	0.833	0.834333	0.87	1.264	1.066	1.06667	0.898882	0.898321	0.906712	0.901305	0.96	1.006	0.957	0.974333	1.52581	1.24454	1.9502	1.57351	0.843221	0.711324	1.04723	0.867258	1.35043	1.12821	1.74359	1.40741	0.666667	0.816901	1.01408	0.832551	0.979865	0.884084	0.976148	0.946699	0.936838	0.92841	0.815532	0.893594	0.694161	0.719225	0.388105	0.600497	0.454893	0.560747	0.525314	0.513652
Rifabutin		1.149	1.227	1.14	1.172	1.739	1.377	1.041	1.38567	1.018	1.0463	0.991628	1.01864	1.031	1.042	1.085	1.05267	0.319054	0.350539	0.488885	0.386159	0.237761	0.41274	0.278079	0.309527	0.393162	0.461538	0.598291	0.48433	0.375587	0.516432	0.262911	0.384977	0.987671	0.975033	1.0889	1.0172	0.614559	0.879647	0.748708	0.747638	0.206556	0.198279	0.0927244	0.165853	0.568019	1.02297	0.637328	0.742773
Dapsone		1.142	1.03	1.058	1.07667	0.832	0.96	1.149	0.980333	0.954339	0.930834	0.941956	0.942376	0.883	0.869	0.932	0.894667	3.04093	2.67513	2.77111	2.82906	2.47287	1.81938	1.73551	2.00925	3.7265	2.95726	3.1453	3.27635	1.86854	1.58685	1.81221	1.75587	1.00997	0.871817	0.978502	0.953431	0.963327	1.02263	1.00246	0.996137	7.30844	9.77959	8.94272	8.67691	2.71281	2.84834	3.06896	2.8767
Enalapril maleate		1.115	1.104	0.977	1.06533	1.444	1.466	1.336	1.41533	0.961469	1.02568	0.994919	0.994023	0.977	0.959	0.984	0.973333	0.756989	0.67837	0.815571	0.75031	0.930768	0.831932	0.928349	0.897016	0.905983	0.803419	0.854701	0.854701	1.22066	1.10798	1.12676	1.1518	1.14702	0.928939	1.01344	1.0298	0.993328	0.94025	0.869212	0.934263	0.407436	0.357942	0.385206	0.383528	0.698191	0.657367	0.624205	0.659921
Dantrolene sodium		1.506	1.225	1.183	1.30467	1.774	2.297	1.865	1.97867	1.09251	1.03507	1.02216	1.04991	0.992	1.001	0.991	0.994667	0.40187	1.0146	1.02338	0.813281	0.79242	0.724456	0.637484	0.71812	0.649573	1.33333	1.29915	1.09402	1.277	1.51174	1.07981	1.28951	1.01456	1.06945	1.01976	1.03459	0.915968	0.896604	0.93433	0.915634	0.486037	0.648081	0.681677	0.605265	0.890282	0.575669	1.08925	0.851732
Piperacillin sodium		1.162	1.342	1.021	1.175	1.553	1.633	1.471	1.55233	0.968066	0.967828	0.919725	0.951873	0.977	0.98	1.011	0.989333	1.22011	0.7713	1.15466	1.04869	0.76535	0.943094	0.625504	0.777983	1.52137	1.11111	1.26496	1.29915	1.07981	1.39906	0.835681	1.10485	1.04504	0.960783	1.00936	1.00506	0.922892	1.00868	1.11303	1.01487	1.07569	0.191882	0.374474	0.547348	0.713301	0.662155	1.01592	0.797127
Naloxone hydrochloride		1.425	1.497	1.179	1.367	0.894	1.373	1.735	1.334	0.998687	1.03145	0.910704	0.980281	1.014	1.024	1	1.01267	0.704322	0.797825	0.675699	0.725949	0.879046	0.941136	1.03041	0.950198	1.07692	1.28205	0.854701	1.07123	0.713615	1.17371	1.62441	1.17058	1.07565	0.907627	0.936249	0.973174	1.0149	0.843225	0.94918	0.935768	0.448285	0.396374	0.299224	0.381294	1.06547	0.788171	0.693567	0.849071
Cyclophosphamide hydrate		1.294	1.375	1.376	1.34833	1.579	1.604	1.617	1.6	1.06007	1.03081	1.00809	1.03299	1.007	1.019	0.98	1.002	0.750883	0.660433	0.532583	0.647966	0.85739	0.870291	0.888607	0.872096	1.04274	0.974359	0.786325	0.934473	1.23005	1.26761	1.30516	1.26761	0.949136	1.07106	0.809615	0.943271	1.02684	0.948076	0.922089	0.965668	0.342901	0.360519	0.181337	0.294919	0.442279	0.62672	0.516284	0.528428
Bethanechol chloride		1.27	1.316	1.137	1.241	1.76	1.395	1.481	1.54533	1.08582	1.03305	0.966764	1.02854	0.978	1	0.966	0.981333	0.539452	1.08902	1.03673	0.888401	0.822371	0.911185	0.935491	0.889682	0.735043	1.53846	1.26496	1.17949	1.31455	1.15493	1.25822	1.24257	1.07143	0.960659	1.11232	1.04814	0.95229	0.880249	0.821251	0.884597	0.882617	0.267972	0.976286	0.708958	0.573217	0.669132	0.602871	0.615073
Quinidine		1.103	1.366	1.415	1.29467	1.563	1.574	1.099	1.412	0.889665	1.03689	1.03302	0.986524	1.013	0.98	0.983	0.992	1.4012	1.13138	0.844385	1.12566	0.661329	0.656722	0.902776	0.740276	1.65812	1.65812	1.28205	1.53276	0.938967	0.938967	0.901408	0.926448	0.861285	0.947525	1.07936	0.962724	0.859881	1.1038	0.878944	0.947541	0.634085	0.11027	0.300544	0.3483	0.628209	0.555952	0.99498	0.726381
Atropine		1.402	1.524	1.392	1.43933	1.282	1.036	1.591	1.303	1.03369	1.01799	0.977522	1.00973	0.998	0.917	1.013	0.976	0.795535	0.930064	0.743631	0.823077	0.878701	1.29766	0.753715	0.976692	1.19658	1.52137	1.11111	1.27635	1.02347	1.22066	1.0892	1.11111	0.955951	1.0526	1.06586	1.0248	0.984197	0.949079	0.859178	0.930818	0.427985	0.519027	0.59536	0.514124	1.2406	0.651288	0.746276	0.879389
Eszopiclone		1.245	1.381	1.403	1.343	1.368	1.338	1.693	1.46633	0.997735	1.04445	1.02913	1.02377	0.96	0.971	1.001	0.977333	0.793436	0.357409	0.431447	0.527431	0.854164	0.842184	0.915678	0.870675	1.05983	0.529915	0.649573	0.746439	1.06103	1.02347	1.40845	1.16432	1.13339	0.957809	1.05879	1.05	1.02373	0.900517	0.991221	0.971822	0.89717	0.567939	0.540275	0.668461	0.951107	0.866481	0.837376	0.884988
Terbutaline sulfate		1.038	0.992	1.198	1.076	1.613	1.704	1.5	1.60567	0.966133	0.91422	1.01228	0.96421	1	1.015	0.99	1.00167	0.88961	1.33212	0.731419	0.984384	0.750029	0.928119	0.978344	0.885497	0.991453	1.4188	0.940171	1.11681	1.09859	1.43662	1.33333	1.28951	1.23264	0.911096	1.04616	1.0633	0.948076	0.924397	1.02855	0.967006	0.154121	1.0055	0.149775	0.436465	0.808439	0.932774	0.678978	0.80673
Metyrapone		1.043	1.068	1.292	1.13433	1.261	1.129	1.275	1.22167	0.936843	0.824052	0.960096	0.906997	0.997	0.969	1.032	0.999333	0.85488	0.626085	0.60395	0.694972	1.12326	0.988941	0.972814	1.02834	0.957265	0.717949	0.837607	0.837607	1.28638	1.01408	1.12676	1.14241	0.950747	1.10055	1.09944	1.05024	1.02975	0.901219	1.06858	0.999849	0.571485	0.613799	0.583571	0.589618	1.61082	1.24612	1.39202	1.41632
Daunorubicin hydrochloride	26	0.001	0.001	0	0.000666667	0.002	0	0	0.000666667	1.36173	0	0	0.453909	0.568	?????	?????	0.568	25.9269	25.9269		25.9269	6.42178	0	0	2.14059	0.0222222	0.0222222	0.0444444	0.0296296	0.00970874	0	0	0.00323625	0.409227	0.814511	0.547091	0.590276	0.46096	0	0	0.153653	0.00273446	0.153738	0.0163393	0.0576038	0.000856218	0.000658629	0.000842433	0.00078576
Penicillin V		1.016	0.874	0.925	0.938333	0.858	0.977	0.773	0.869333	0.967521	0.96921	0.955007	0.963913	1.005	1.008	0.976	0.996333	1.20586	0.822401	0.845216	0.957826	1.15258	0.867968	0.887619	0.96939	1.28889	0.755556	0.822222	0.955556	0.951456	0.815534	0.660194	0.809061	1.1075	1.01396	0.903473	1.00831	0.843016	0.960033	0.876185	0.893078	0.739821	0.810076	0.0942496	0.548049	1.29625	1.12501	0.988877	1.13671
Fluorometholone		1.15	1.241	1.189	1.19333	0.856	1.104	1.007	0.989	1.10308	1.05843	1.06027	1.07393	0.92	0.962	0.938	0.94	3.93233	3.66243	3.10993	3.56823	3.19612	2.54123	2.99782	2.91172	4.75556	4.77778	3.88889	4.47407	2.63107	2.69903	2.90291	2.74434	0.765608	0.93192	0.81238	0.836636	0.895344	0.941183	0.912134	0.91622	24.8966	7.68158	5.69837	12.7589	7.64751	5.57164	5.58695	6.2687
Rifapentine		2.31	1.58	1.18	1.69	1.858	1.755	1.545	1.71933	1.14071	1.09472	1.12944	1.12162	1.043	1.03	1.048	1.04033	0.128079	0.0534094	0.161265	0.114251	0.206396	0.166709	0.15027	0.174458	0.311111	0.0888889	0.2	0.2	0.368932	0.281553	0.223301	0.291262	1.05647	0.580119	0.719156	0.785248	0.946127	0.86918	0.675113	0.83014	0.0642745	0.0173756	0.112651	0.0647669	0.371847	0.216107	0.267448	0.285134
Hexachlorophene		1.777	1.555	1.386	1.57267	1.088	1.191	1.385	1.22133	1.01067	1.00703	0.935589	0.98443	0.936	0.845	0.875	0.885333	0.119004	0.16308	0.15245	0.144845	0.370922	0.194837	0.400719	0.322159	0.222222	0.266667	0.222222	0.237037	0.38835	0.223301	0.533981	0.381877	0.966013	0.987535	0.928617	0.960722	1.17408	0.908426	0.871961	0.984824	0.343629	0.151283	0.0544691	0.183127	0.806993	0.379405	0.568785	0.585061
Thiothixene		0.113	0.122	0.02	0.085	0.253	0.137	0.079	0.156333	0.754343	0.744416	0.397175	0.631978	0.939	1.025	0.979	0.981	0.373088	0.69147	0	0.354853	0.0399435	0.0738505	0.127151	0.0803151	0.0444444	0.0888889	0	0.0444444	0.00970874	0.00970874	0.00970874	0.00970874	0.530897	0.644364	0	0.391754	0.464359	0.471982	0.344664	0.427002	0.00791937	0.0167106	0.00375989	0.00946329	0.000649729	0.000544085	0.000545969	0.000579928
Ofloxacin		0.954	1.158	1.05	1.054	1.729	1.715	1.869	1.771	0.975324	1.01578	0.985346	0.992151	1.035	1.05	1.045	1.04333	0.908478	0.912367	1.2279	1.01625	0.928204	0.629592	0.874647	0.810814	0.911111	1.11111	1.35556	1.12593	1.54369	1.03883	1.57282	1.38511	0.810036	0.968996	0.910185	0.896406	0.978574	0.881541	1.02112	0.960411	1.06702	1.0367	0.748939	0.950886	0.892542	0.672095	0.637463	0.734033
Doxazosin		0.851	0.965	0.866	0.894	0.945	0.725	0.669	0.779667	0.87521	0.885586	0.842419	0.867739	0.954	0.889	0.972	0.938333	1.26653	0.481722	1.12289	0.957048	0.235037	0.500899	0.558438	0.431458	1.13333	0.488889	1.02222	0.881481	0.213592	0.349515	0.359223	0.307443	0.854997	1.02642	0.978052	0.953157	0.838278	0.793881	0.903276	0.845145	0.0917546	0.941515	0.314786	0.449352	0.298635	0.200573	0.559283	0.35283
Pindolol		1.184	1.199	0.834	1.07233	0.817	1.509	1.7	1.342	1.00067	0.986817	0.861225	0.949569	0.988	1.02	1.029	1.01233	1.19627	0.775473	1.82473	1.26549	1.42024	0.916388	0.777549	1.03806	1.48889	0.977778	1.6	1.35556	1.1165	1.3301	1.27184	1.23948	0.917324	0.895376	0.864586	0.892428	1.13865	0.879584	0.976411	0.998215	0.62346	0.651735	0.685692	0.653629	1.50537	1.0433	0.88011	1.14293
Meloxicam		1.127	1.157	1.078	1.12067	1.521	1.466	1.498	1.495	0.999386	0.981016	1.00663	0.995677	1.016	1.009	1.059	1.028	0.7874	1.20508	0.862328	0.951603	0.77665	0.846648	0.613152	0.745483	0.933333	1.46667	0.977778	1.12593	1.13592	1.19417	0.883495	1.0712	1.06915	1.02376	0.963989	1.01896	0.929234	0.997528	1.06974	0.998833	0.451942	0.226737	0.446945	0.375208	1.01697	0.783352	0.685813	0.828713
Oxacillin sodium		0.867	1.024	0.994	0.961667	1.451	1.223	1.479	1.38433	1.06864	1.02888	1.00761	1.03504	1.001	1.007	1.022	1.01	0.998963	1.6308	1.19108	1.27362	0.980478	1.11431	0.866684	0.987156	0.911111	1.75556	1.24444	1.3037	1.36893	1.31068	1.23301	1.30421	1.05135	0.859898	0.846473	0.919241	0.921096	0.86197	0.974145	0.91907	2.92084	1.71007	0.826896	1.81927	0.971265	1.52439	1.21262	1.23609
Cetirizine		0.989	1.23	1.207	1.142	1.519	1.463	1.165	1.38233	0.921658	0.936692	0.981071	0.946474	1.006	1.016	1.014	1.012	1.34664	1.04796	1.27794	1.22418	0.870408	0.80709	0.753917	0.810472	1.4	1.35556	1.62222	1.45926	1.27184	1.13592	0.84466	1.08414	0.789474	0.910718	0.94854	0.882911	0.98527	0.962402	1.04203	0.996566	0.0886958	0.177725	0.516977	0.261132	0.747189	0.71306	0.840861	0.767037
Probenecid		1.048	1.096	0.952	1.032	1.183	1.421	1.545	1.383	0.883108	0.937523	0.89422	0.90495	1.057	1.053	1.034	1.048	0.907182	1.06015	1.7314	1.23291	0.657077	0.937195	0.855767	0.81668	1	1.22222	1.73333	1.31852	0.747573	1.28155	1.27184	1.10032	0.958555	1.00661	0.988813	0.984658	1.04069	0.995674	1.00536	1.01391	0.0867087	0.536907	0.485986	0.369867	1.18539	1.00057	0.949622	1.04519
Aminoglutethimide		1.118	1.208	0.944	1.09	1.222	1.677	1.443	1.44733	0.976631	0.976727	0.880766	0.944708	0.967	1.031	1.045	1.01433	0.737101	0.944776	0.806067	0.829315	0.933342	0.625867	0.846391	0.801867	0.866667	1.2	0.8	0.955556	1.09709	1.00971	1.17476	1.09385	0.932133	0.859045	0.940017	0.910398	0.855068	0.911722	1.03492	0.933903	0.539812	0.316399	0.278984	0.378398	0.553061	0.764489	0.894218	0.737256
Promethazine hydrochloride		0.806	0.859	0.929	0.864667	0.477	0.256	0.171	0.301333	0.989976	0.996104	0.954408	0.980163	0.943	0.739	0.829	0.837	0.104745	0.196785	0.27301	0.191513	0.677113	0.748523	0.353455	0.59303	0.0888889	0.177778	0.266667	0.177778	0.31068	0.184466	0.0582524	0.184466	0.862242	0.99137	0.737694	0.863769	0.848681	0.650597	0.408838	0.636039	0.194062	0.01736	0.425296	0.212239	0.221896	0.3006	0.381995	0.301497
Nadolol		1.119	1.021	1.067	1.069	1.412	1.749	1.175	1.44533	0.964022	0.93898	0.937291	0.946764	1.024	1.038	1.041	1.03433	1.03863	1.03448	1.06948	1.04753	0.87195	0.657719	0.850501	0.79339	1.22222	1.11111	1.2	1.17778	1.18447	1.1068	0.961165	1.08414	1.0017	0.894737	0.908694	0.935045	0.958179	0.914813	1.00381	0.958934	0.756563	0.577024	0.613866	0.649151	0.806182	0.650931	0.754783	0.737299
Hydroxyzine pamoate		0.986	1.163	0.921	1.02333	1.073	1.3	1.354	1.24233	0.860925	0.926588	0.872473	0.886662	0.98	0.993	1.033	1.002	0.750065	0.526834	0.734249	0.670383	0.535962	0.752761	0.760339	0.683021	0.777778	0.644444	0.711111	0.711111	0.553398	0.941748	0.990291	0.828479	0.824846	0.838376	0.723205	0.795476	0.963432	0.80583	0.843428	0.870897	0.5819	0.465784	0.19824	0.415308	0.859122	0.883464	0.98515	0.909245
Acitretin		1.726	1.999	1.414	1.713	1.715	2.468	1.665	1.94933	1.08912	1.08906	1.01875	1.06564	0.994	1.027	0.982	1.001	0.220379	0.137412	0.164376	0.174056	0.470845	0.233111	0.41215	0.372035	0.4	0.288889	0.244444	0.311111	0.776699	0.553398	0.660194	0.66343	1.00927	0.775517	0.881739	0.888842	0.976308	0.816337	0.848475	0.880374	0.21052	0.108552	0.154238	0.15777	0.332328	0.293678	0.374104	0.33337
Fexofenadine hydrochloride		1.083	1.1	1.133	1.10533	2.093	1.524	1.457	1.69133	1.03897	1.07707	1.00023	1.03876	1.036	1.025	1.026	1.029	0.89733	0.884107	1.19367	0.991703	0.819933	0.662086	0.796686	0.759568	1.02222	1.02222	1.42222	1.15556	1.65049	0.970874	1.1165	1.24595	0.901236	0.887066	0.803218	0.86384	0.924701	1.01298	0.890812	0.942831	1.43788	0.152616	0.543107	0.7112	0.839243	0.90459	0.748006	0.830613
Minoxidil		1.076	1.097	1.135	1.10267	1.314	1.535	1.157	1.33533	0.922258	0.965152	0.962606	0.950005	1.025	1.032	1.06	1.039	0.98211	1.21364	0.838216	1.01132	0.929489	0.749294	0.732469	0.80375	1.11111	1.4	1	1.17037	1.17476	1.1068	0.815534	1.03236	0.992436	0.791391	0.761666	0.848498	0.93974	0.874948	1.02967	0.948118	0.0950344	0.695732	0.303185	0.364651	0.692399	0.611034	0.863604	0.722346
Fluoxetine hydrochloride		0.051	0.077	0.092	0.0733333	0.041	0.063	0.074	0.0593333	0.756522	0.275246	0.638691	0.55682	0.83	0.966	0.834	0.876667	0.41146	0	1.37672	0.596059	0.740945	0	0.409838	0.383594	0.0222222	0	0.133333	0.0518519	0.0291262	0	0.0291262	0.0194175	1.19028	0	0.676753	0.622345	0.842604	0	0.418006	0.420203	0.00181429	0.00209506	0.00169334	0.00186757	0.000804991	0.000718505	0.000573948	0.000699148
Acyclovir		0.981	1.376	1.115	1.15733	1.161	1.391	1.014	1.18867	0.974602	1.04066	0.997411	1.00422	0.991	1.003	1.025	1.00633	0.625097	1.01374	0.720249	0.786362	1.1644	0.769201	1.05459	0.996061	0.644444	1.46667	0.844444	0.985185	1.30097	1.02913	1.02913	1.11974	0.879928	0.958875	0.975282	0.938028	1.01246	1.05717	0.965389	1.01167	0.440184	0.330755	0.353734	0.374891	1.11609	0.677971	0.895557	0.89654
Felodipine		0.176	0.39	0.352	0.306	0.201	0.21	0.209	0.206667	0.86369	0.952352	0.904664	0.906902	1.034	1.06	1.055	1.04967	1.32046	1.08245	1.62043	1.34111	0.401361	0.529155	0.193167	0.374561	0.244444	0.444444	0.6	0.42963	0.0776699	0.106796	0.038835	0.0744337	0.908694	1.03804	1.02387	0.990198	0.829522	1.05027	1.00958	0.963123	0.506243	0.0105801	0.619647	0.378824	0.234744	0.628898	0.310995	0.391546
Cortisol 21-acetate		1.095	1.438	1.368	1.30033	1.481	1.233	0.864	1.19267	1.03321	1.11162	1.15479	1.09987	1.045	0.993	0.966	1.00133	2.10423	1.73425	1.5761	1.80486	1.28782	1.81724	2.23016	1.77841	2.42222	2.62222	2.26667	2.43704	1.83495	2.15534	1.85437	1.94822	0.76124	0.852866	0.831238	0.815115	1.00391	1.02143	0.97054	0.998627	7.55752	6.88962	7.02998	7.15904	3.19616	4.89555	3.58728	3.893
Hydrochlorothiazide		1.131	1.012	1.445	1.196	1.275	1.813	1.157	1.415	0.973922	0.999917	1.05451	1.00945	1.012	1.052	0.987	1.017	0.766399	1.27327	0.46798	0.835883	1.00565	0.879656	0.98523	0.956846	0.911111	1.35556	0.711111	0.992593	1.23301	1.53398	1.09709	1.28803	0.84658	0.723951	0.710739	0.760423	0.932118	1.04677	0.907808	0.96223	0.84856	0.102063	0.544874	0.498499	1.40115	1.17201	1.04607	1.20641
Orphenadrine hydrochloride		1.107	1.404	1.206	1.239	1.301	1.304	1.56	1.38833	1.00475	0.981588	0.979641	0.98866	1.016	1.042	1.072	1.04333	0.878144	1.02333	0.455795	0.785757	0.542898	0.696378	0.672874	0.637383	1.02222	1.51111	0.577778	1.03704	0.679612	0.873786	1.00971	0.854369	0.840827	0.846793	0.888984	0.858868	0.897919	1.07777	0.949423	0.975038	0.395711	0.522329	0.227236	0.381759	0.71153	0.776079	0.667854	0.718487
Lovastatin		0.708	0.775	0.858	0.780333	0.936	1.047	0.91	0.964333	0.885355	0.814749	0.865147	0.855084	1	1.011	0.994	1.00167	1.04433	1.71766	1.18175	1.31458	0.9598	0.848574	1.34202	1.05013	0.777778	1.4	1.06667	1.08148	0.864078	0.854369	1.17476	0.964401	0.934903	0.986576	0.913488	0.944989	0.906984	0.967244	0.90513	0.926452	0.893136	0.274372	0.973996	0.713835	0.468963	0.616839	0.655132	0.580311
Priscoline hydrochloride		0.999	1.017	0.79	0.935333	1.373	1.35	1.2	1.30767	0.950432	1.04639	0.982296	0.99304	1.02	1.03	1.028	1.026	0.889033	0.830957	0.88307	0.867686	0.676342	0.717698	0.874775	0.756272	0.933333	0.888889	0.733333	0.851852	0.893204	0.932039	1.00971	0.944984	0.974004	0.850842	1.0994	0.97475	1.01823	1.07283	1.12732	1.07279	0.191267	1.19826	1.17136	0.85363	0.598423	0.724837	0.665992	0.663084
Mafenide acetate	27	1.176	0.993	1.149	1.106	1.666	1.697	1.754	1.70567	1.01136	0.949815	1.03566	0.998946	1.044	1.046	1.03	1.04	0.836592	1.52866	1.04293	1.13606	1.09663	1.05159	0.95086	1.03302	0.92	1.42	1.12	1.15333	1.67805	1.63902	1.53171	1.61626	1.05574	0.99864	1.03337	1.02925	0.939777	0.916293	1.07452	0.976864	1.28287	0.982921	1.29933	1.18837	0.637901	0.633677	0.817754	0.696444
Folic acid		0.825	0.724	1.121	0.89	1.093	1.052	1.135	1.09333	0.987999	0.936734	1.0513	0.992011	1.023	1.008	1.026	1.019	1.84064	1.06339	0.953922	1.28598	0.923664	1.01993	1.0572	1.00026	1.42	0.72	1	1.04667	0.926829	0.985366	1.10244	1.00488	0.991472	0.778396	0.879743	0.883204	0.963782	0.990711	1.1194	1.02463	0.846149	2.46819	1.67211	1.66215	0.82914	1.02642	0.820489	0.892015
Furosemide		1.303	1.035	1.469	1.269	0.923	1.121	1.104	1.04933	1.09552	1.00882	1.03905	1.0478	0.963	1.002	0.972	0.979	1.00157	0.475163	0.786019	0.754252	1.43895	1.14627	1.0395	1.20824	1.22	0.46	1.08	0.92	1.21951	1.18049	1.05366	1.15122	0.803362	0.981832	1.00161	0.928933	1.02004	0.942699	1.01075	0.991163	1.35268	1.5621	1.3256	1.41346	0.730769	0.585046	0.763809	0.693208
Methocarbamol		1.118	1.212	1.027	1.119	1.307	1.454	1.398	1.38633	0.995912	0.973219	0.959383	0.976171	0.99	0.984	0.982	0.985333	1.47292	0.97033	1.16655	1.20327	0.820635	0.803943	0.926829	0.850469	1.54	1.1	1.12	1.25333	0.985366	1.07317	1.19024	1.08293	0.998146	1.01446	0.943888	0.985498	0.970671	0.943117	0.976307	0.963365	2.14995	1.64971	1.66257	1.82074	0.924614	0.803032	0.77184	0.833162
Hydrocortisone		1.484	1.525	1.509	1.506	1.544	1.513	1.623	1.56	1.23873	1.12218	1.16167	1.17419	1.001	1.011	1.036	1.016	1.36885	2.41178	1.09126	1.62396	1.39636	1.56529	1.40039	1.45401	1.9	3.44	1.54	2.29333	1.98049	2.17561	2.0878	2.0813	1.03572	0.937956	1.1535	1.04239	1.02776	0.972132	0.86682	0.955572	16.5248	9.81352	9.8175	12.0519	2.89434	3.22061	3.1788	3.09792
Oxybutynin hydrochloride		1.602	1.299	1.254	1.385	2.284	2.135	1.853	2.09067	1.06993	0.997683	1.00573	1.02445	1.042	1.048	1.048	1.046	0.70735	0.905597	0.324118	0.645688	0.372113	0.353263	0.395568	0.373648	1.06	1.1	0.38	0.846667	0.780488	0.692683	0.673171	0.715447	1.06402	0.895563	1.3274	1.09566	0.804405	0.954911	0.767248	0.842188	0.932923	0.613235	0.918582	0.82158	0.592788	0.620765	0.676251	0.629935
19-Norethindrone acetate		1.323	1.304	1.38	1.33567	1.472	1.214	1.454	1.38	1.04763	1.02689	1.04133	1.03862	1.029	0.961	1.011	1.00033	0.679254	0.311755	0.743987	0.578332	0.555723	0.918483	0.664652	0.712953	0.84	0.38	0.96	0.726667	0.75122	1.02439	0.887805	0.887805	0.85935	1.12965	0.988877	0.992626	1.01701	0.997704	0.976934	0.997217	0.882838	1.17484	1.71197	1.25655	0.698856	0.554317	0.759198	0.67079
Midodrine hydrochloride		0.954	1.302	1.155	1.137	1.475	1.491	1.419	1.46167	0.946665	1.03582	0.98903	0.990506	1.013	1.023	0.996	1.01067	0.918858	0.936615	0.814565	0.890013	1.04425	0.812433	1.02569	0.960789	0.82	1.14	0.88	0.946667	1.41463	1.1122	1.33659	1.2878	1.02682	1.14794	1.01187	1.06221	0.959816	0.925373	0.976725	0.953971	1.0285	0.74984	0.67628	0.818206	0.877914	0.879852	0.909475	0.88908
Clopidogrel		1.322	1.49	1.319	1.377	1.838	1.945	1.824	1.869	1.04525	1.0773	1.05799	1.06018	1.006	1.029	1.026	1.02033	0.857721	0.918633	0.794561	0.856972	0.676164	0.688107	0.710411	0.691561	1.06	1.28	0.98	1.10667	1.14146	1.22927	1.19024	1.18699	1.24163	1.30206	1.13002	1.22457	0.988728	0.883311	0.959712	0.943917	1.23448	0.918624	1.89215	1.34842	0.583889	0.720433	0.586693	0.630338
Valproic acid		1.031	1.062	1.533	1.20867	1.598	2.005	1.181	1.59467	1.05102	1.01213	1.08325	1.0488	1.02	1.052	1.003	1.025	1.1207	1.20836	0.823106	1.05072	0.890568	0.847687	1.16095	0.9664	1.08	1.2	1.18	1.15333	1.30732	1.56098	1.25854	1.37561	1.10641	0.967248	1.14819	1.07395	1.02735	0.97923	1.12765	1.04474	2.12696	1.25918	0.511068	1.29907	1.42306	0.910285	1.05658	1.12998
Phenoxybenzamine hydrochloride		1.561	1.518	1.448	1.509	0.928	1.053	0.984	0.988333	1.04462	1.09959	1.10272	1.08231	0.978	0.96	0.947	0.961667	1.04158	0.746909	0.664644	0.817712	1.45377	1.84661	1.37089	1.55709	1.52	1.06	0.9	1.16	1.23902	1.78537	1.23902	1.42114	0.999753	0.938697	1.06291	1.00045	1.00052	0.952823	1.08746	1.0136	2.15491	1.97121	2.81003	2.31205	1.08369	1.26136	0.934969	1.09334
Diflunisal		1.208	1.161	0.948	1.10567	1.008	1.267	1.06	1.11167	0.995723	1.03771	0.947492	0.993642	0.984	1.027	0.985	0.998667	0.95572	0.73702	0.812317	0.835019	1.34931	1.0231	1.43291	1.26844	1.08	0.8	0.72	0.866667	1.24878	1.19024	1.39512	1.27805	1.011	0.881968	0.960573	0.95118	0.935393	0.914831	0.918902	0.923042	0.979486	1.23005	0.909453	1.03966	0.873862	0.882664	0.988752	0.915093
Altretamine		0.919	1.138	1.286	1.11433	1.682	1.33	1.653	1.555	1.00548	1.05975	1.04134	1.03552	1.04	0.988	1.011	1.013	0.837716	1.01483	0.898404	0.916985	1.00439	1.07001	0.796892	0.957095	0.72	1.08	1.08	0.96	1.55122	1.30732	1.20976	1.3561	1.10345	1.03386	0.905698	1.01434	0.951675	1.09279	1.00699	1.01715	1.49944	2.65485	1.87093	2.00841	0.64061	0.558001	0.664707	0.621106
Nabumetone		1.279	1.274	1.116	1.223	1.711	1.581	1.243	1.51167	1.02839	0.96175	0.954287	0.981475	0.998	0.975	0.998	0.990333	1.65565	1.19173	0.996404	1.28126	1.60774	1.51824	2.04216	1.72271	1.98	1.42	1.04	1.48	2.52683	2.20488	2.33171	2.35447	0.99345	1.18131	1.02979	1.06818	1.08005	1.00595	1.05219	1.04606	2.6113	2.73299	1.99303	2.44577	3.86424	3.24171	2.59605	3.234
Penicillin G potassium		1.486	1.674	1.197	1.45233	0.859	1.42	1.22	1.16633	1.09028	1.06228	1.07907	1.07721	0.994	1.019	1.003	1.00533	0.647561	0.383457	1.01843	0.68315	1.31146	1.50399	1.09691	1.30412	0.9	0.6	1.14	0.88	1.03415	1.96098	1.22927	1.40813	1.10394	0.912743	0.82944	0.948708	1.14487	1.00532	0.977247	1.04248	1.61609	1.64228	1.36745	1.54194	0.186612	0.816959	0.616821	0.540131
Labetalol hydrochloride		1.286	1.361	1.031	1.226	1.754	1.762	1.391	1.63567	1.07142	1.04472	0.995128	1.03709	1.049	1.056	1.027	1.044	0.732075	1.57181	0.8294	1.04443	0.908411	0.699331	0.763796	0.790513	0.88	2	0.8	1.22667	1.46341	1.13171	0.97561	1.19024	0.885799	0.882338	1.0639	0.944012	0.937689	0.940612	0.859618	0.91264	1.17921	1.28779	1.37743	1.28148	0.524335	0.627575	0.672399	0.608103
Tropicamide		1.164	1.16	1.293	1.20567	1.798	1.895	1.575	1.756	1.02448	0.989741	1.04054	1.01826	1.044	1.038	1.033	1.03833	1.02922	1.19847	1.83592	1.35454	0.844665	0.667098	1.03173	0.847831	1.12	1.3	2.22	1.54667	1.39512	1.16098	1.49268	1.34959	1.16463	1.03386	0.986281	1.06159	0.966183	0.945622	0.960338	0.957381	3.10318	0.549439	0.934972	1.5292	0.531745	0.498984	0.553237	0.527989
Triamcinolone acetonide		1.227	1.523	1.513	1.421	1.338	1.412	1.085	1.27833	1.159	1.21321	1.20896	1.19372	0.993	1.012	0.995	1	2.28433	1.39087	1.82356	1.83292	1.97741	1.89553	2.8192	2.23071	2.62	1.98	2.58	2.39333	2.42927	2.45854	2.80976	2.56585	1.01137	0.891608	0.855271	0.919417	0.938211	0.859931	0.974846	0.924329	19.9184	18.9354	23.2859	20.7133	4.08233	4.31895	4.42932	4.27687
Eryped		1.817	1.677	1.337	1.61033	1.178	1.338	1.756	1.424	1.10675	1.10907	0.996144	1.07065	0.997	1.009	1.04	1.01533	0.812093	0.688919	0.991908	0.830973	0.901648	1.09591	0.865242	0.954265	1.38	1.08	1.24	1.23333	0.97561	1.34634	1.39512	1.23902	1.09319	0.870844	0.84526	0.936431	0.995512	1.01232	0.945413	0.984414	1.16055	1.60035	1.35759	1.37283	0.687955	0.755005	0.797868	0.746943
Pyridostigmine bromide		1.208	1.335	1.075	1.206	1.533	1.348	1.319	1.4	1.04799	1.12485	1.02014	1.06433	1.018	0.98	1.031	1.00967	1.38166	0.913239	1.23331	1.17607	1.57954	1.52097	1.426	1.50884	1.56	1.14	1.24	1.31333	2.22439	1.88293	1.72683	1.94472	1.09356	0.885923	1.0026	0.994026	1.07661	1.01868	0.962113	1.01914	2.30158	2.55769	1.64969	2.16965	1.3774	1.34214	1.19412	1.30455
Nicardipine hydrochloride		0.417	0.521	0.511	0.483	0.446	0.532	0.627	0.535	1.06403	0.966134	1.07334	1.0345	1.035	1.034	1.022	1.03033	0.513149	0.698584	0.460328	0.557354	0.643212	0.439024	0.525362	0.535866	0.2	0.34	0.22	0.253333	0.263415	0.214634	0.302439	0.260163	1.18823	0.684711	0.876035	0.916327	1.01284	0.75514	0.895522	0.887834	1.01042	0.335948	0.713049	0.686474	0.355265	0.41703	0.429478	0.400591
Loperamide hydrochloride		0.142	0.108	0.114	0.121333	0.046	0.016	0.013	0.025	0.876961	0.616717	0.943703	0.812461	0.938	0.965	0.559	0.820667	0.452461	0.397842	1.68577	0.845359	0.464206	0	0	0.154735	0.06	0.04	0.18	0.0933333	0.0195122	0	0	0.00650407	0.458781	1.06303	0.551724	0.691179	0.378562	0	0	0.126187	0.0116235	0.0401375	0.0603327	0.0373646	0.110474	0.0837372	0.00394363	0.0660516
Fludarabine		1.324	1.423	1.297	1.348	1.099	1.023	1.446	1.18933	1.04166	1.07602	1.03855	1.05208	1.01	0.986	1.052	1.016	0.888739	0.826927	0.709148	0.808272	1.39161	1.34974	1.03576	1.25904	1.1	1.1	0.86	1.02	1.40488	1.26829	1.37561	1.34959	1.07786	0.926585	1.05525	1.0199	1.0549	1.05333	0.905229	1.00449	1.89771	1.16536	1.87323	1.64543	0.718236	0.669561	0.885059	0.757619
Dexamethasone		1.407	1.642	1.043	1.364	1.297	1.39	1.238	1.30833	1.17307	1.20287	1.22268	1.19954	1.021	1.025	1.047	1.031	2.20364	1.67993	2.29692	2.06016	2.25225	1.69652	1.83625	1.92834	2.9	2.58	2.24	2.57333	2.68293	2.16585	2.0878	2.3122	1.03609	1.0152	0.884069	0.978453	0.961904	0.918798	0.91504	0.931914	24.645	29.8726	30.181	28.2329	6.38347	4.44519	5.91734	5.582
					#DIV/0!	#N/A	#N/A	#N/A	#N/A				#DIV/0!	#N/A	#N/A	#N/A	#N/A				#DIV/0!	#N/A	#N/A	#N/A	#N/A				#DIV/0!	#N/A	#N/A	#N/A	#N/A				#DIV/0!	#N/A	#N/A	#N/A	#N/A					#N/A	#N/A	#N/A	#N/A
					#DIV/0!	#N/A	#N/A	#N/A	#N/A				#DIV/0!	#N/A	#N/A	#N/A	#N/A				#DIV/0!	#N/A	#N/A	#N/A	#N/A				#DIV/0!	#N/A	#N/A	#N/A	#N/A				#DIV/0!	#N/A	#N/A	#N/A	#N/A				#DIV/0!	#N/A	#N/A	#N/A	#N/A
					#DIV/0!	#N/A	#N/A	#N/A	#N/A				#DIV/0!	#N/A	#N/A	#N/A	#N/A				#DIV/0!	#N/A	#N/A	#N/A	#N/A				#DIV/0!	#N/A	#N/A	#N/A	#N/A				#DIV/0!	#N/A	#N/A	#N/A	#N/A				#DIV/0!	#N/A	#N/A	#N/A	#N/A
					#DIV/0!	#N/A	#N/A	#N/A	#N/A				#DIV/0!	#N/A	#N/A	#N/A	#N/A				#DIV/0!	#N/A	#N/A	#N/A	#N/A				#DIV/0!	#N/A	#N/A	#N/A	#N/A				#DIV/0!	#N/A	#N/A	#N/A	#N/A				#DIV/0!	#N/A	#N/A	#N/A	#N/A
Epigallocatechin gallate	37	1.995	2.01	1.854	1.953	1.327	1.362	1.428	1.37233	1.2686	1.27674	1.26531	1.27021	1.061	1.06	1.063	1.06133	0.0965567	0.191669	0.0741633	0.120796	0.0147275	0.0394916	0.0171276	0.0237823	0.197183	0.394366	0.140845	0.244131	0.0188679	0.0518868	0.0235849	0.0314465	0.555072	0.861535	0.529726	0.648778	1.23636	0.858394	0.984067	1.02627	0.0072221	0.0162786	0.02898	0.0174936	0.0378293	0.0439216	0.0367927	0.0395145
Pemolide		1.367	1.655	1.602	1.54133	1.123	1.042	1.206	1.12367	1.0892	1.07187	1.10469	1.08859	0.984	0.988	1.003	0.991667	1.08717	0.964604	0.429569	0.827113	1.09398	1.03366	1.25817	1.1286	1.52113	1.6338	0.704225	1.28638	1.18396	1.03774	1.46226	1.22799	1.07532	0.98044	1.16403	1.07326	1.0573	1.04326	1.00918	1.03658	0.501871	1.62999	1.6869	1.27292	1.1952	1.25257	1.68323	1.377
4-Phenylbutyric acid		1.283	1.185	1.124	1.19733	0.782	0.882	0.776	0.813333	1.09306	1.02987	1.0163	1.04641	0.982	0.998	0.981	0.987	1.07296	0.882254	1.00433	0.986516	0.920089	1.10926	0.97169	1.00035	1.40845	1.07042	1.15493	1.21127	0.693396	0.943396	0.726415	0.787736	1.06904	0.970081	1.04987	1.02966	1.10225	1.02976	0.95621	1.0294	0.441916	0.313617	0.917718	0.55775	0.572534	1.47485	1.26397	1.10378
Telmisartan		1.422	1.303	1.081	1.26867	0.99	1.276	1.186	1.15067	1.05072	1.0063	1.02038	1.0258	0.98	1.001	0.986	0.989	0.890441	1.09824	1.22177	1.07015	0.895107	0.824415	0.854088	0.85787	1.29577	1.46479	1.35211	1.37089	0.853774	1.01415	0.976415	0.948113	1.10772	1.19786	0.868588	1.05806	0.947768	0.905983	0.981851	0.945201	0.806799	0.762437	0.751861	0.773699	0.945949	0.864401	0.959245	0.923198
Pentoxifylline		1.067	0.905	1.233	1.06833	0.913	0.899	1.077	0.963	0.941838	0.92243	0.977545	0.947271	0.98	1.006	1.01	0.998667	1.29039	1.09439	1.40597	1.26358	0.76125	1.2466	1.33639	1.11475	1.40845	1.01408	1.77465	1.39906	0.669811	1.08019	1.38679	1.0456	0.97504	0.949474	0.970963	0.965159	1.03809	0.946291	0.90535	0.963244	0.495684	0.464949	1.0849	0.681844	1.25354	1.13882	0.295552	0.895968
Bisoprolol fumarate		1.102	1.342	1.211	1.21833	0.854	1.089	1.081	1.008	0.926757	0.995911	0.901804	0.941491	0.972	0.974	0.995	0.980333	1.39875	1.02552	1.02312	1.14913	0.882343	0.593356	0.873616	0.783105	1.57746	1.40845	1.26761	1.41784	0.726415	0.622642	0.910377	0.753145	0.940658	0.893383	0.974269	0.936103	0.862931	0.943864	0.884774	0.89719	0.536159	0.348235	0.427735	0.437376	0.817674	0.565322	0.845316	0.742771
Moclobemide		1.358	1.373	1.151	1.294	1.253	1.176	0.965	1.13133	1.05949	1.0346	0.948366	1.01415	1.008	0.996	0.973	0.992333	0.587768	1.06261	1.72165	1.12401	0.956963	0.899035	1.22675	1.02758	0.816901	1.49296	2.02817	1.44601	1.15566	1.01887	1.14151	1.10535	0.809191	1.06077	0.999063	0.956343	0.922233	1.00401	1.00559	0.977278	0.172276	0.515974	0.849243	0.512498	0.850662	0.915983	0.797826	0.854824
Sumatriptan succinate		1.225	1.59	1.255	1.35667	1.333	1.069	1.262	1.22133	0.938772	1.01033	1.00471	0.984606	0.993	0.985	0.99	0.989333	2.38093	1.41946	1.40356	1.73465	0.763759	1.02089	0.938853	0.907835	2.98592	2.30986	1.80282	2.3662	0.981132	1.05189	1.14151	1.05818	0.962808	0.965342	0.898672	0.942274	1.00222	1.02849	1.0995	1.0434	1.85943	1.37827	1.70279	1.64683	1.08014	1.03434	1.09501	1.06983
Quetiapine fumarate		1.197	1.309	1.126	1.21067	0.899	1.218	1.137	1.08467	0.994811	1.04162	0.868283	0.968239	0.984	1.003	1.006	0.997667	1.47195	0.883217	1.29569	1.21695	0.942235	1.11744	1.18824	1.08264	1.80282	1.1831	1.49296	1.49296	0.816038	1.31132	1.30189	1.14308	1.09901	0.775249	0.788143	0.887469	0.980585	0.946291	0.875805	0.934227	0.501094	0.436206	0.57956	0.50562	1.47258	1.23639	0.935325	1.21476
CGS 15943		2.37	2.263	1.963	2.19867	1.519	1.583	1.624	1.57533	1.18605	1.06024	0.967173	1.07115	1.033	1.013	1.03	1.02533	1.62605	0.899831	2.0195	1.51513	0.97649	1.30802	0.723286	1.0026	3.94366	2.08451	4.05634	3.3615	1.42925	1.99528	1.13208	1.51887	0.732162	0.740757	0.774588	0.749169	0.63691	0.560304	0.583307	0.593507	0.306131	0.198089	0.312764	0.272328	0.596552	0.325034	0.552542	0.491376
Tripelennamine hydrochloride		1.091	1.111	1.339	1.18033	1.203	1.217	1.027	1.149	1.04104	0.999124	0.964635	1.0016	0.985	1.008	0.97	0.987667	1.2367	1.33783	1.11028	1.22827	0.907107	0.667758	0.990891	0.855252	1.38028	1.52113	1.52113	1.47418	1.05189	0.783019	0.981132	0.938679	0.929748	0.979228	1.03047	0.979815	0.832858	0.831909	0.910731	0.8585	0.256357	0.563984	0.641339	0.487227	0.446348	0.497845	0.563549	0.502581
D-Cycloserine		1.035	1.272	1.127	1.14467	1.337	1.267	1.099	1.23433	0.943408	0.993814	0.928401	0.955207	1.011	1.004	0.993	1.00267	1.19721	1.40621	1.51409	1.3725	0.849288	0.903616	0.824088	0.858997	1.26761	1.83099	1.74648	1.61502	1.09434	1.10377	0.872642	1.02358	1.09758	1.0092	0.920381	1.00905	0.966762	0.996412	1.01614	0.993106	0.977539	0.795598	0.631806	0.801648	0.637695	0.467622	0.832743	0.64602
Tacrolimus		0.059	0.183	0.15	0.130667	0.065	0.207	0.101	0.124333	0.987403	0.476772	0.492733	0.652303	0.75	0.907	0.886	0.847667	0.926078	0.150494	0.183723	0.420098	0.150439	0.165603	0.0969836	0.137675	0.056338	0.028169	0.028169	0.0375587	0.00943396	0.0330189	0.00943396	0.0172956	1.13913	0.385476	0.428894	0.651165	0.425662	0.416799	0.651894	0.498118	0.0654911	0.0323346	0.00348701	0.0337709	0.00156955	0.00150253	0.00243844	0.00183684
Didanosine		1.115	1.74	1.581	1.47867	0.984	1.003	0.941	0.976	0.926831	0.995662	1.03421	0.985569	1	0.965	0.993	0.986	1.67927	0.933301	0.66169	1.09142	1.50657	1.08362	1.43064	1.34028	1.91549	1.66197	1.07042	1.5493	1.42925	1.04717	1.29717	1.25786	0.909912	1.06662	1.05714	1.01122	0.908937	0.944603	0.96328	0.93894	0.663132	0.452934	0.962865	0.692977	0.82958	0.640462	0.855164	0.775069
MK 886		1.148	1.348	1.281	1.259	1.405	1.263	1.24	1.30267	1.07686	1.10988	1.15423	1.11366	0.896	0.893	0.851	0.88	0.263906	0.469781	0.386708	0.373465	0.240332	0.38368	0.422189	0.348734	0.309859	0.647887	0.507042	0.488263	0.325472	0.466981	0.504717	0.43239	0.77007	1.00094	1.10056	0.957188	0.876649	0.788013	0.851113	0.838592	0.207564	0.274349	0.103957	0.19529	0.3074	0.308321	0.335704	0.317141
Linopirdine dihydrochloride		1.296	0.817	1.045	1.05267	0.968	0.876	0.876	0.906667	1.00257	0.884303	1.03043	0.972435	0.985	0.996	1.016	0.999	0.764508	1.21238	0.895738	0.957541	1.09747	1.25751	1.14569	1.16689	1.01408	1.01408	0.957746	0.995305	1.02358	1.06132	0.966981	1.0173	1.18475	0.823737	1.08579	1.03143	0.962013	0.913686	0.946502	0.940734	0.580224	0.628454	0.531703	0.580127	0.607285	0.754234	0.583932	0.648483
Clotrimazole		0.138	0.316	0.478	0.310667	0.189	0.278	0.283	0.25	0.836552	0.728185	0.86686	0.810533	0.776	0.815	0.881	0.824	0	0.261739	0.51842	0.260053	0.20684	0.45819	0.13833	0.267787	0	0.084507	0.253521	0.112676	0.0377358	0.122642	0.0377358	0.0660377	0	1.06728	0.919279	0.662185	0.604622	1.05023	0.441806	0.698885	0.0846609	0.130933	0.879269	0.364954	0.310492	0.366544	0.00978561	0.22894
Flecainide hydrochloride		1.724	1.784	1.452	1.65333	1.056	0.999	1.113	1.056	1.01269	1.07416	0.993403	1.02675	0.98	0.975	0.977	0.977333	0.94197	0.493619	0.815314	0.750301	0.843834	0.788633	0.738668	0.790378	1.66197	0.901408	1.21127	1.25822	0.858491	0.759434	0.792453	0.803459	1.02617	1.09328	1.14475	1.08807	0.854595	0.821146	0.91854	0.86476	0.549025	0.590862	0.985987	0.708625	0.552732	0.514219	0.576396	0.547782
Rimcazole dihydrochloride		0.055	0.146	0.104	0.101667	0.13	0.132	0.069	0.110333	0.978	0.641809	0.580342	0.733384	0.912	0.842	0.79	0.848	0.501565	0.564411	0.793884	0.619953	0.150439	0.0370916	0.212513	0.133348	0.028169	0.084507	0.084507	0.0657277	0.0188679	0.00471698	0.0141509	0.0125786	0.426249	1.11731	0.43793	0.660496	0.477366	0.335444	0.535507	0.449439	0.0158264	0.000545054	0.00423573	0.00686908	0.00404485	0.000531032	0.025717	0.0100976
Spectinomycin		1.337	1.382	1.439	1.386	1.145	1.177	1.01	1.11067	0.979246	0.976782	0.99509	0.983706	1.006	0.997	0.998	1.00033	1.27595	1.45389	1.01373	1.24785	0.974309	0.843943	0.82387	0.880707	1.74648	2.05634	1.49296	1.76526	1.07547	0.957547	0.801887	0.944969	0.967657	0.952119	0.973277	0.964351	0.922655	0.938905	0.931096	0.930885	1.07055	0.784264	0.716093	0.856967	0.520785	0.702758	0.800771	0.674771
Hexamethylenebisacetamide		1.612	1.415	1.316	1.44767	0.935	1.179	1.162	1.092	1.06226	1.00367	0.959721	1.00855	1.001	1.021	1.012	1.01133	0.973513	1.05033	0.983145	1.00233	1.5645	1.0042	1.3305	1.29973	1.60563	1.52113	1.32394	1.48357	1.41038	1.14151	1.49057	1.34748	1.03829	0.926773	1.03135	0.998806	0.969083	0.925715	0.873272	0.92269	1.03326	0.658669	0.678941	0.79029	1.2949	1.01115	0.962499	1.08952
Pirenperone		1.637	1.301	1.389	1.44233	1.008	1.231	1.255	1.16467	0.96399	0.961672	0.918836	0.948166	0.983	0.983	0.988	0.984667	0.874308	0.930893	0.931375	0.912192	1.00016	0.715322	0.900998	0.872161	1.46479	1.23944	1.32394	1.34272	0.971698	0.849057	1.08962	0.970126	1.06662	1.208	0.92512	1.06658	0.839506	0.890577	0.922866	0.884316	0.389679	0.192104	0.476758	0.352847	0.71469	0.252604	0.684593	0.550629
Cerivastatin sodium		0.43	0.36	0.773	0.521	0.674	0.546	0.707	0.642333	0.472093	0.433115	0.642352	0.515853	0.925	0.924	0.943	0.930667	2.75367	4.20419	2.45774	3.13853	1.37272	1.49828	1.46654	1.44584	1.21127	1.5493	1.94366	1.56808	0.891509	0.787736	1	0.893082	1.19114	1.07609	1.02617	1.0978	0.962541	0.967711	0.933207	0.954486	0.427712	1.42858	0.81553	0.890606	0.860544	0.655334	0.626133	0.714004
Argatroban		1.183	1.877	1.401	1.487	1.343	1.211	1.076	1.21	0.951066	1.08729	1.02186	1.02007	1.012	1.01	1.029	1.017	1.09343	0.791958	0.84445	0.909945	1.11864	1.23275	0.87798	1.07646	1.32394	1.52113	1.21127	1.35211	1.44811	1.43868	0.910377	1.26572	0.966555	0.862306	0.819329	0.88273	0.905877	0.863142	0.95125	0.906757	1.02744	1.13723	0.781001	0.981892	0.774168	0.955498	0.920786	0.883484
PD 81723		1.711	1.632	1.752	1.69833	1.371	1.456	1.478	1.435	1.14263	1.07866	1.12058	1.11396	1.018	1.025	1.018	1.02033	0.289429	0.505899	0.471226	0.422185	0.417826	0.383134	0.493427	0.431462	0.507042	0.84507	0.84507	0.732394	0.551887	0.537736	0.70283	0.597484	0.845336	0.900656	0.750565	0.832185	0.815553	0.946291	0.928564	0.896803	0.280929	0.0949154	0.170423	0.182089	0.401718	0.630302	0.425946	0.485988
Indomethacin hydrate		1.429	1.463	1.27	1.38733	1.209	1.111	1.297	1.20567	1.01868	1.04866	1.02993	1.03242	1.015	1.007	1.018	1.01333	0.963159	0.846617	0.628461	0.812746	0.894562	1.26897	0.735832	0.966454	1.40845	1.26761	0.816901	1.16432	1.04245	1.35849	0.919811	1.10692	0.980219	1.05075	1.08359	1.03818	0.884035	0.938377	0.905983	0.909465	1.21131	0.660094	0.657211	0.842871	0.738768	0.596845	0.867027	0.734213
Prochlorperazine maleate		0.039	0.008	0.006	0.0176667	0.098	0.115	0.108	0.107	-0.172592	0.419134	-0.586797	-0.113418	0.91	0.996	0.902	0.936	0.708163	0	9.63159	3.44658	0.100038	0	0	0.0333461	0.028169	0	0.056338	0.028169	0.00943396	0	0	0.00314465	0.386027	0	0.412805	0.266277	0.739897	0	0	0.246632	0.0030913	-0.0696364	0.00155994	-0.0216617	0.000317633	0.000287032	0.000247205	0.000283957
Lidocaine		0.937	1.055	1.144	1.04533	1.399	1.228	1.12	1.249	1.00722	0.956801	0.942337	0.968787	1.017	1.012	1.005	1.01133	0.675415	0.860824	0.697568	0.744602	0.685758	0.976163	0.85627	0.839397	0.647887	0.929577	0.816901	0.798122	0.924528	1.15566	0.924528	1.00157	1.17208	0.881591	0.819108	0.957592	0.948823	0.941859	1.07618	0.988956	1.14269	0.462325	0.556436	0.720485	0.599594	0.433743	0.619798	0.551045
Balsalazide	38	1.071	1.02	1.19	1.09367	1.28	1.053	1.116	1.14967	1.0181	0.937091	0.982375	0.97919	0.996	0.999	0.981	0.992	1.1173	2.1163	1.61754	1.61705	0.808276	1.05327	1.26831	1.04328	1.13889	2.05556	1.83333	1.67593	1.00302	1.07553	1.3716	1.15005	1.03716	1.06222	1.06486	1.05474	0.849814	0.943661	0.992112	0.928529	2.72173	2.95434	1.03592	2.23733	1.58235	1.91515	0.93894	1.47881
Actarit		1.322	1.236	1.139	1.23233	0.906	1.142	1.125	1.05767	1.06212	1.03017	1.07805	1.05678	0.985	1.013	0.998	0.998667	1.3243	0.802435	0.871024	0.999254	0.96289	0.824433	1.13576	0.974362	1.66667	0.944444	0.944444	1.18519	0.845921	0.912387	1.23867	0.998993	1.08596	0.974057	0.80532	0.955113	0.976131	0.929004	0.906713	0.937283	1.26001	0.306604	0.303843	0.623486	0.879711	0.974879	0.907635	0.920742
Cilastatin sodium		1.055	0.99	0.876	0.973667	1.074	0.882	0.993	0.983	1.01444	0.953513	0.966719	0.978223	1.009	0.99	0.995	0.998	1.2162	1.59195	1.2992	1.36912	0.992578	1.22956	0.872775	1.03164	1.22222	1.5	1.08333	1.26852	1.03323	1.05136	0.839879	0.974824	0.926459	0.931736	1.02034	0.95951	1.02428	0.964426	0.798921	0.929208	1.91713	1.2744	1.47069	1.55407	1.36477	1.42075	1.07471	1.28674
Clarithromycin		0.803	0.819	0.902	0.841333	0.76	0.862	0.704	0.775333	0.821508	0.906201	0.882297	0.870002	0.946	0.957	0.952	0.951667	0.72664	0.890159	1.19732	0.938038	0.697011	0.383186	0.646568	0.575588	0.555556	0.694444	1.02778	0.759259	0.513595	0.320242	0.441088	0.424975	0.652743	0.952072	0.70188	0.768898	0.922897	0.816835	0.928088	0.889273	1.66434	1.13447	0.590811	1.12987	0.671653	0.414011	0.688289	0.591317
Phenelzine sulfate		1.327	1.178	1.334	1.27967	0.884	1.037	0.949	0.956667	0.997204	0.949697	1.03161	0.992837	0.972	0.952	0.962	0.962	0.857604	1.51143	1.68439	1.35114	1.05064	1.31665	1.37274	1.24668	1.08333	1.69444	2.13889	1.63889	0.900302	1.32326	1.26284	1.16213	0.852589	0.979993	0.981422	0.938002	0.97664	0.97837	1.05837	1.00446	1.14643	1.76949	3.12099	2.0123	1.65037	3.7817	2.4256	2.61922
6-Aminoindazole		1.243	1.86	1.205	1.436	1.173	1.089	0.988	1.08333	0.978934	1.11641	1.1012	1.06552	0.984	0.971	0.948	0.967667	0.938618	0.501988	0.605616	0.682074	0.961839	0.938325	1.04105	0.980405	1.11111	0.888889	0.694444	0.898148	1.09366	0.990937	0.996979	1.02719	0.972518	1.0543	0.717709	0.914844	0.981628	0.961677	0.939997	0.961101	1.12885	0.338356	2.56298	1.3434	1.45255	1.27955	1.10362	1.27858
19-Nortestosterone		1.091	0.945	0.924	0.986667	0.941	0.957	1.17	1.02267	1.0011	0.877204	1.0309	0.969734	0.953	0.966	0.968	0.962333	0.749006	1.32753	0.599901	0.892147	1.311	1.02253	0.953957	1.09583	0.777778	1.19444	0.527778	0.833333	1.19637	0.94864	1.08157	1.07553	1.08146	1.09421	0.976476	1.05071	0.793628	0.865998	0.946613	0.868747	0.777051	0.452062	0.8137	0.680937	0.986994	0.833079	0.882798	0.900957
Methylperone hydrochloride		1.181	1.361	1.127	1.223	1.293	1.087	1.003	1.12767	0.987198	0.977432	0.995371	0.986667	0.984	0.972	0.989	0.981667	1.01292	1.07207	1.37202	1.15234	0.795665	1.10095	0.64	0.845539	1.13889	1.38889	1.47222	1.33333	0.996979	1.16012	0.622356	0.926485	0.797406	0.839727	0.94053	0.859221	0.933381	0.964833	0.964324	0.954179	1.09011	0.664609	0.868095	0.87427	0.860295	0.585977	0.995242	0.813838
Pidotimod		1.565	1.391	1.154	1.37	1.204	1.202	1.177	1.19433	1.04032	1.03206	0.941508	1.00463	1.005	0.99	0.985	0.993333	1.60338	0.796968	1.31461	1.23832	0.647225	0.782791	1.12775	0.852589	2.38889	1.05556	1.44444	1.62963	0.755287	0.912387	1.28701	0.984894	0.973398	0.986699	1.03979	0.999963	0.970736	1.10184	0.96066	1.01108	1.32575	1.52284	1.65973	1.50277	1.10504	1.06045	1.20743	1.12431
Aripiprazole		0.113	0.056	0.049	0.0726667	0.069	0.079	0.035	0.061	0.469515	0.187806	0.286186	0.314502	0.857	0.743	0.845	0.815	8.02485	7.24826	10.6503	8.64115	1.97938	1.5732	2.30778	1.95345	0.861111	0.388889	0.5	0.583333	0.132931	0.120846	0.0785498	0.110775	0.548093	0.640211	0.634605	0.607636	0.616825	0.613772	0.568884	0.599827	0.00512762	0.0609917	0.00377825	0.0232992	0.000494345	0.000400351	0.00374467	0.00154645
Alprazolam		1.172	1.011	1.174	1.119	1.126	1.062	1.17	1.11933	1.03576	1.00164	1.03669	1.02469	0.988	0.971	0.992	0.983667	1.49404	1.81834	1.66501	1.65913	1.3734	1.54299	1.40637	1.44092	1.66667	1.75	1.86111	1.75926	1.49849	1.58912	1.59517	1.56093	1.11158	1.11828	0.869847	1.03323	0.920352	0.855718	0.918215	0.898095	2.53742	0.757365	0.382701	1.22583	1.49122	0.915079	1.01914	1.14181
Medroxyprogesterone		1.676	1.909	1.644	1.743	1.238	1.274	1.214	1.242	1.17102	1.1735	1.10966	1.1514	1.003	0.988	0.97	0.987	1.11382	1.03926	1.65084	1.26798	1.20841	0.982989	1.11947	1.10362	1.77778	1.88889	2.58333	2.08333	1.45015	1.2145	1.31722	1.32729	0.852479	1.0454	0.803122	0.900333	0.929411	0.906815	0.917095	0.917774	5.64834	0.77286	4.25293	3.55804	2.81373	2.50652	2.98681	2.76902
(+/-)-Vesamicol hydrochloride		1.7	1.539	0.916	1.385	1.119	0.98	1.127	1.07533	1.05628	1.04289	0.936145	1.01177	0.996	0.983	0.994	0.991	0.92669	0.701292	1.37003	0.999337	0.857931	1.0178	1.02279	0.966174	1.5	1.02778	1.19444	1.24074	0.930514	0.966767	1.11782	1.00504	1.02177	0.906673	0.870177	0.932872	1.06815	0.976335	0.963102	1.00253	0.780268	0.65859	1.24017	0.893011	0.812218	1.49419	0.844915	1.05044
Pergolide mesylate		1.14	1.537	1.295	1.324	1.076	0.996	1.148	1.07333	1.03825	1.01923	1.07064	1.04271	0.981	0.959	0.962	0.967333	2.55939	1.06312	1.2167	1.61307	1.02516	1.11343	0.787389	0.975326	2.77778	1.55556	1.5	1.94444	1.06949	1.07553	0.876133	1.00705	0.825217	0.846983	0.723755	0.798652	0.790982	0.791796	0.820602	0.801126	0.647068	0.708312	0.704392	0.686591	0.644543	0.633747	0.71896	0.66575
Diazoxide		1.072	1.354	1.303	1.243	1.109	1.194	1.173	1.15867	1.01205	1.01248	1.06931	1.03128	0.974	0.981	0.989	0.981333	0.734841	1.29324	0.985089	1.00439	0.775698	0.793563	0.658916	0.742726	0.75	1.66667	1.22222	1.21296	0.833837	0.918429	0.749245	0.833837	1.16797	1.0576	0.922722	1.04943	0.96921	0.97094	0.918622	0.952924	1.24014	0.775527	0.944729	0.9868	0.992821	0.747748	0.717447	0.819339
E-4031 dihydrochloride		1.257	1.192	1.165	1.20467	1.425	1.377	1.144	1.31533	0.989001	0.929594	1.0617	0.993433	1.002	0.998	0.994	0.998	1.25298	1.29771	1.32778	1.29283	0.660361	0.715008	0.79514	0.723503	1.5	1.47222	1.47222	1.48148	0.912387	0.954683	0.882175	0.916415	0.922282	0.815104	0.991646	0.909677	0.911191	0.950379	1.15599	1.00585	1.15268	0.88249	1.01723	1.01747	0.912563	0.539725	0.711322	0.721203
Midazolam hydrochloride		1.418	1.278	1.511	1.40233	1.152	1.127	1.272	1.18367	1.0547	0.964375	0.993463	1.00418	0.998	0.981	0.997	0.992	0.864066	1.09543	1.19707	1.05219	1.01714	1.65859	0.930969	1.20223	1.16667	1.33333	1.72222	1.40741	1.13595	1.81269	1.14804	1.36556	1.03353	1.14785	1.02177	1.06771	0.921574	0.946308	0.931243	0.933042	0.993266	1.04325	1.08664	1.04105	1.52419	2.03746	1.26544	1.60903
Raltitrexed		1.244	1.661	1.397	1.434	1.177	1.2	1.131	1.16933	0.986507	1.06498	1.0959	1.04913	0.994	0.994	0.992	0.993333	1.0082	0.544483	0.689115	0.747266	0.926897	0.862266	0.716322	0.835161	1.19444	0.861111	0.916667	0.990741	1.0574	1.00302	0.785498	0.94864	1.00209	1.06233	1.00813	1.02418	0.884625	0.846964	0.923915	0.885168	1.54332	1.21928	0.867787	1.21013	1.18157	0.929339	1.06216	1.05769
Azasetron hydrochloride		1.321	1.356	1.813	1.49667	1.203	1.198	1.407	1.26933	1.1512	1.09399	1.2115	1.15223	1.007	0.974	1.015	0.998667	1.17073	1.16178	1.49677	1.27642	0.637373	1.21222	1.02791	0.959168	1.47222	1.5	2.58333	1.85185	0.743202	1.40785	1.40181	1.18429	0.975926	1.02946	0.85039	0.951926	1.03832	0.873123	0.876686	0.929377	2.96399	0.498108	1.28609	1.58273	0.729539	1.64515	0.965158	1.11328
Exemestane		1.363	1.16	1.607	1.37667	1.17	0.937	0.795	0.967333	1.03398	0.970205	1.11175	1.03865	0.995	0.989	1.004	0.996	0.749254	1.08151	0.363072	0.731279	0.70844	0.845189	0.8	0.784543	0.972222	1.19444	0.555556	0.907407	0.803625	0.767372	0.616314	0.729104	0.899747	0.815104	0.944927	0.886593	0.885032	0.888798	0.900097	0.891309	0.460707	0.707368	0.903879	0.690651	0.756573	0.90567	0.993925	0.885389
Nifedipine		1.702	1.713	1.659	1.69133	0.568	0.85	1.11	0.842667	1.13564	1.04522	1.07607	1.08564	0.915	0.958	0.996	0.956333	0.702783	0.45999	0.492545	0.551773	0.790148	0.887488	0.640263	0.772633	1.13889	0.75	0.777778	0.888889	0.435045	0.731118	0.688822	0.618328	1.12103	0.996372	0.937122	1.01817	0.95842	1.07812	0.89287	0.97647	1.16321	0.671828	1.0649	0.966646	1.22428	1.57132	1.39056	1.39539
Proxymetacaine		1.343	1.721	1.22	1.428	1.144	1.23	0.873	1.08233	0.999443	1.02999	1.06285	1.03076	0.991	0.993	0.984	0.989333	0.977634	1.01715	0.956759	0.983847	0.986535	0.764926	0.913892	0.888451	1.25	1.66667	1.11111	1.34259	1.09366	0.912387	0.773414	0.926485	1.08651	1.01143	0.990986	1.02964	0.872207	0.965545	0.945799	0.92785	0.600228	0.845087	0.750533	0.731949	0.940137	1.1272	0.701615	0.922984
Benactyzine hydrochloride		0.907	0.993	1.185	1.02833	1.255	1.136	1.255	1.21533	1.01459	1.00518	1.08552	1.0351	0.994	0.983	1.002	0.993	0.803678	1.58623	1.28082	1.22358	0.775041	1.02016	1.20236	0.99919	0.694444	1.5	1.44444	1.21296	0.942598	1.12387	1.46224	1.17623	0.927009	1.16819	1.01858	1.03792	0.957708	0.949158	1.03751	0.981458	2.17515	0.845317	0.395566	1.13868	0.498791	0.869784	0.930026	0.7662
Altanserin hydrochloride		0.929	0.851	1.01	0.93	0.491	0.476	0.521	0.496	0.991495	0.905615	1.01328	0.97013	0.938	0.931	0.906	0.925	7.25746	7.60959	7.42644	7.43116	3.40479	5.39599	5.38864	4.72981	6.41667	6.16667	7.13889	6.57407	1.61934	2.48943	2.71903	2.27593	0.559965	0.587996	0.56711	0.57169	0.648888	0.68207	0.744567	0.691842	2.27516	1.20234	1.25627	1.57793	0.255033	1.22372	1.16482	0.881192
Tryptoline		1.48	1.693	1.634	1.60233	1.098	1.118	1.067	1.09433	1.21887	1.12631	1.14518	1.16345	1	1.006	0.996	1.00067	0.591203	0.465209	0.624751	0.560388	0.766108	0.9089	0.683744	0.786251	0.833333	0.75	0.972222	0.851852	0.81571	0.984894	0.706949	0.835851	1.09509	1.00187	0.844674	0.980543	0.928393	0.823553	0.885847	0.879264	1.34197	1.91785	1.7819	1.68057	0.76534	1.22079	1.30765	1.09793
Omeprazole		1.556	1.567	1.155	1.426	1.127	1.181	1.22	1.176	1.05228	0.992621	1.0398	1.02823	0.996	0.996	1.014	1.002	0.768887	0.837724	0.681909	0.76284	0.680066	0.770575	0.663908	0.704849	1.13889	1.25	0.75	1.0463	0.743202	0.882175	0.785498	0.803625	1.03034	1.05716	0.831923	0.973141	0.846557	0.949361	0.868034	0.887984	0.964589	0.975078	1.15214	1.0306	1.02003	0.805308	0.878659	0.901331
Procyclidine hydrochloride		1.56	1.332	1.351	1.41433	1.303	1.096	1.132	1.177	1.09886	1.05105	1.00772	1.05254	1.009	1.001	1.002	1.004	0.916252	0.9416	0.561382	0.806412	0.597701	0.796453	0.727094	0.707083	1.36111	1.19444	0.722222	1.09259	0.755287	0.845921	0.797583	0.799597	0.90997	0.82093	1.21743	0.982778	0.925238	0.882691	1.04636	0.951431	1.1239	0.648033	1.18693	0.986288	0.734302	0.590383	0.600904	0.641863
Clofazimine		1.005	0.99	0.883	0.959333	1.006	0.864	0.924	0.931333	0.944288	0.930345	0.925041	0.933225	0.964	0.978	0.994	0.978667	0.667744	0.265408	0.792992	0.575381	0.551199	0.562627	0.512709	0.542178	0.638889	0.25	0.666667	0.518519	0.537764	0.471299	0.459215	0.489426	0.720567	1.81038	1.09212	1.20769	0.859789	0.865388	0.867627	0.864268	1.22214	0.476241	0.715325	0.804569	0.634358	0.581085	0.503954	0.573132
Tegafur	39	1.297	1.29	1.626	1.40433	1.287	1.228	1.466	1.327	1.07047	1.02691	1.1055	1.06763	1.019	1.018	1.023	1.02	1.21767	1.28101	1.2649	1.25453	0.726717	0.835872	1.12189	0.894827	1.59259	1.66667	2.07407	1.77778	0.973451	1.06785	1.71091	1.25074	1.09989	1.17635	0.904582	1.06027	0.979459	0.949979	0.996381	0.975273	0.702847	1.05378	1.53995	1.09886	1.08939	0.887619	1.15232	1.04311
Desoximetasone		1.443	1.391	1.37	1.40133	1.073	0.969	0.886	0.976	1.07909	1.11482	1.06272	1.08554	0.974	0.971	0.967	0.970667	2.47007	1.74302	2.35977	2.19095	1.58512	2.01778	1.95754	1.85348	3.59259	2.44444	3.25926	3.09877	1.76991	2.0354	1.80531	1.87021	0.892567	1.10048	0.87902	0.957357	0.892188	0.83493	0.898361	0.87516	7.33129	7.77802	7.33197	7.48043	5.3467	6.86401	6.06917	6.09329
Stanozolol		1.05	1.235	1.146	1.14367	0.752	0.852	0.981	0.861667	0.94577	1.05707	0.936885	0.979907	0.979	0.956	0.99	0.975	2.58925	1.33852	2.62759	2.18512	1.93116	1.79732	2.43345	2.05397	2.74074	1.66667	3.03704	2.48148	1.51032	1.59292	2.48378	1.86234	0.686064	0.718341	0.888915	0.76444	0.958067	0.943699	0.864836	0.922201	0.46566	0.902015	0.961405	0.77636	1.55526	1.48741	1.41261	1.48509
Diphenoxylate hydrochloride		1.052	1.202	0.826	1.02667	0.726	0.935	0.677	0.779333	0.789299	0.817886	0.825739	0.810975	0.851	0.951	0.917	0.906333	1.3263	1.28351	1.15572	1.25517	0.890789	0.703505	0.972202	0.855498	1.40741	1.55556	0.962963	1.30864	0.672566	0.684366	0.684366	0.680433	0.901402	1.12275	1.06043	1.02819	0.880694	0.791933	0.792997	0.821875	0.898171	0.74613	0.584273	0.742858	0.925199	0.582661	1.10495	0.870937
Itraconazole		0.587	0.62	0.772	0.659667	0.658	0.559	0.593	0.603333	0.822074	0.806966	0.932382	0.853807	0.992	0.939	0.962	0.964333	1.5016	2.42867	1.71246	1.88091	1.35187	1.44958	1.71998	1.50714	0.888889	1.51852	1.33333	1.24691	0.926254	0.843658	1.06195	0.943953	1.15985	1.0887	1.23937	1.16264	0.954555	1.13463	1.02075	1.03665	0.0190161	0.107351	0.191507	0.105958	0.568171	1.69156	0.640314	0.966681
Olanzapine		1.329	1.817	1.675	1.607	1.19	1.001	0.999	1.06333	0.994298	1.0909	0.971695	1.01897	0.985	0.99	0.987	0.987333	1.18878	1.1121	1.0307	1.11052	0.600238	0.799072	0.918983	0.772764	1.59259	2.03704	1.74074	1.79012	0.743363	0.831858	0.955752	0.843658	1.05654	0.985393	1.03781	1.02658	0.867284	0.844402	0.918902	0.876862	0.482817	0.382312	0.995966	0.620365	0.58999	0.885212	1.08448	0.853227
Tolazamide		1.663	1.679	1.404	1.582	1.067	1.125	1.217	1.13633	1.04048	1.02122	0.957827	1.00651	0.992	0.976	0.988	0.985333	1.21461	1.0282	1.36019	1.201	1.14239	1.17919	0.838363	1.05331	2.03704	1.74074	1.92593	1.90123	1.26844	1.38053	1.06195	1.23697	1.05831	1.09188	1.03381	1.06133	1.03001	0.998723	1.07556	1.03477	0.59337	0.751632	1.02822	0.791074	0.953993	1.46156	1.14581	1.18712
Ifenprodil hemitartrate		1.495	1.45	1.224	1.38967	1.18	1.191	0.838	1.06967	0.961552	0.880908	0.941806	0.928089	0.989	0.971	0.947	0.969	1.03181	0.785109	0.660092	0.82567	0.87437	0.780955	0.819	0.824775	1.55556	1.14815	0.814815	1.17284	1.07375	0.967552	0.713864	0.918387	0.857345	1.10838	1.49794	1.15455	0.971903	0.912303	0.890805	0.925004	0.680758	0.240355	0.52254	0.481218	1.03086	0.637481	0.909623	0.859323
Dichloroacetic acid		1.021	1.075	1.23	1.10867	1.146	0.996	1.092	1.078	0.968852	1.07455	1.01336	1.01892	0.966	0.972	0.976	0.971333	1.58328	0.9568	0.925962	1.15535	1.0586	0.967333	1.00243	1.00945	1.62963	1.03704	1.14815	1.2716	1.26254	1.00295	1.13864	1.13471	1.12451	0.891742	1.10296	1.03974	1.03395	0.92103	0.886867	0.947283	0	0.721336	0.421516	0.380951	0.838665	1.00361	0.731577	0.857949
Megestrol acetate		1.325	1.708	1.665	1.566	0.762	0.874	1.145	0.927	1.02564	1.03162	1.06935	1.0422	0.975	0.971	0.995	0.980333	5.07376	1.63412	0.992916	2.56693	3.93557	3.13888	1.00549	2.69331	6.77778	2.81481	1.66667	3.75309	3.12094	2.85546	1.19764	2.39135	0.711391	1.11438	1.13347	0.986414	0.857386	0.803427	0.972861	0.877891	2.15503	0.706399	1.27785	1.37976	2.94605	2.42512	2.68465	2.68527
Lacidipine		0.259	0.163	0.198	0.206667	0.061	0.179	0.151	0.130333	0.778484	0.705379	1.00724	0.830366	0.794	0.972	0.908	0.891333	0.992082	0.225865	4.07473	1.76423	0	1.73957	0.714714	0.818094	0.259259	0.037037	0.814815	0.37037	0	0.324484	0.112094	0.145526	0.684415	0.413712	0.686182	0.59477	0	0.6308	0.553746	0.394849	0.00034137	0.00200809	0.00386383	0.0020711	0.000455413	0.000340743	0.000371257	0.000389138
GR 89696 fumarate		1.363	1.818	1.224	1.46833	1.141	1.18	0.959	1.09333	0.901028	0.971515	1.03549	0.969346	0.983	0.994	0.955	0.977333	1.15877	0.909293	0.930129	0.999398	0.810168	0.961218	0.969145	0.91351	1.59259	1.66667	1.14815	1.46914	0.961652	1.17994	0.967552	1.03638	1.14042	0.947579	0.979149	1.02238	0.991911	0.868029	0.923159	0.9277	0.635978	0.553085	0.477746	0.555603	1.00866	0.995756	0.943266	0.982559
Vindesine sulfate		0.559	0.579	0.652	0.596667	0.41	0.42	0.487	0.439	0.94776	0.819681	0.76161	0.843017	0.906	0.909	0.925	0.913333	0.919572	0.887901	0.732602	0.846692	1.57799	1.44573	1.22312	1.41561	0.518519	0.518519	0.481481	0.506173	0.672566	0.631268	0.619469	0.641101	0.762045	1.53328	0.745435	1.01359	1.12473	0.940719	0.999042	1.0215	0.314741	0.523509	0.76156	0.53327	1.32801	1.85605	1.63495	1.60634
Tremulacin		1.391	1.292	1.505	1.396	1.224	1.431	1.033	1.22933	1.02808	0.898769	0.974043	0.966962	0.989	1.007	0.98	0.992	0.818725	0.739269	1.02542	0.861138	0.56038	0.289192	0.477722	0.442431	1.14815	0.962963	1.55556	1.22222	0.713864	0.430678	0.513274	0.552606	0.978796	0.963482	0.875957	0.939412	0.938059	0.879204	0.902512	0.906591	0.586325	0.37521	0.306157	0.422564	0.846068	0.564742	0.782967	0.731259
Amlodipine		0.062	0.09	0.067	0.073	0.03	0.089	0.079	0.066	-0.318284	0.0220048	-0.439975	-0.245418	0.427	0.591	0.588	0.535333	1.18211	0.817058	0.544798	0.847988	0	0.0639755	0.0716753	0.0452169	0.0740741	0.0740741	0.037037	0.0617284	0	0.00589971	0.00589971	0.00393314	0.502061	0.485452	0.600071	0.529195	0	1.33078	0.398361	0.57638	0.00025052	0.002351	0.00260309	0.00173487	0.000520063	0.000238098	0.000295506	0.000351222
Nevirapine		1.885	1.671	1.622	1.726	1.366	1.332	1.195	1.29767	1.06057	1.08051	1.09481	1.07863	1.003	1.011	0.993	1.00233	1.81192	1.67051	1.22267	1.56837	1.14556	1.12382	1.26185	1.17707	3.44444	2.81481	2	2.75309	1.62832	1.55752	1.56932	1.58505	1.05266	0.990105	0.991518	1.01143	0.952214	0.98063	1.09132	1.00805	5.11206	2.5588	1.44527	3.03871	2.77802	3.01955	1.85954	2.55237
Rolipram		0.904	1.203	1.353	1.15333	1.251	1.187	0.864	1.10067	1.04975	1.0011	0.9534	1.00142	0.996	0.994	0.986	0.992	1.90888	0.976802	1.46659	1.45076	0.960539	0.836098	1.26683	1.02116	1.74074	1.18519	2	1.64198	1.25074	1.03245	1.13864	1.14061	0.724703	1.46708	1.18353	1.1251	1.02576	1.08397	0.987761	1.0325	0.851606	0.871452	0.75925	0.827436	0.804547	0.617153	1.21495	0.878883
Pramipexole		1.339	1.321	1.28	1.31333	1.276	1.272	1.062	1.20333	1.01597	1.03769	0.973579	1.00908	1.004	0.999	1.01	1.00433	0.905126	0.889846	1.0332	0.942724	0.990658	0.744154	1.08419	0.939667	1.22222	1.18519	1.33333	1.24691	1.31563	0.985251	1.19764	1.16618	1.12145	1.16692	0.963129	1.08383	0.934759	1.07993	0.99851	1.0044	0.0911553	0.93292	0.282015	0.435363	0.584684	0.487533	0.864305	0.645507
S(-)-Timolol maleate		1.51	1.482	1.392	1.46133	1.38	1.393	1.167	1.31333	1.03482	1.07823	1.01716	1.0434	1.011	1.01	0.996	1.00567	1.28935	1.13988	0.923462	1.11756	0.867237	0.964615	1.24407	1.02531	1.96296	1.7037	1.2963	1.65432	1.24484	1.39823	1.51032	1.38446	1.2568	1.29002	1.08352	1.21012	1.07716	0.991273	0.931992	1.00014	0.785712	0.970087	0.719613	0.825138	1.32232	1.39636	0.794704	1.17113
Propafenone		0.904	1.166	0.894	0.988	0.558	0.486	0.58	0.541333	0.944783	0.90399	0.971455	0.940076	0.957	0.903	0.943	0.934333	0.365606	0.598416	0.369774	0.444599	0.90381	0.782087	0.997339	0.894412	0.333333	0.703704	0.333333	0.45679	0.525074	0.39528	0.60177	0.507375	0.792319	1.05207	0.845565	0.896651	0.835675	0.914538	0.87814	0.876117	0.301271	0.270826	0.289575	0.287224	0.757471	1.09	1.04878	0.965416
Parecoxib sodium		0.915	0.715	0.944	0.858	0.5	0.501	0.666	0.555667	1.02033	0.868238	0.85271	0.913758	0.944	0.944	0.98	0.956	1.20433	1.59189	1.75108	1.51577	1.73413	1.87771	1.99219	1.86801	1.11111	1.14815	1.66667	1.30864	0.902655	0.979351	1.38053	1.08751	1.06573	0.97055	1.13783	1.05804	0.987654	0.975096	0.99404	0.985597	0.695112	0.451898	0.572962	0.573324	1.94869	1.22879	1.12987	1.43578
Saquinavir mesylate		0.107	0.03	0.054	0.0636667	0.115	0.115	0.043	0.091	0.48017	-0.650389	0.218911	0.0162306	0.78	0.803	0.683	0.755333	0.343103	0	1.35519	0.566097	0.147653	0.098511	0.790013	0.345392	0.037037	0	0.0740741	0.037037	0.0176991	0.0117994	0.0353982	0.0216323	0.989869	0	0.553422	0.51443	0.64751	0.372073	0.824393	0.614659	0.0820426	0.00293457	0.00855956	0.0311789	0.00209071	0.0171812	0.00844444	0.0092388
Isradipine		1.503	1.614	1.263	1.46	0.983	1.117	0.973	1.02433	1.14594	1.16757	1.05105	1.12152	1.002	1.003	0.992	0.999	1.12405	1.16044	1.30907	1.19785	1.78814	1.42615	1.47438	1.56289	1.7037	1.88889	1.66667	1.75309	1.82891	1.65782	1.49263	1.65978	1.32607	1.01849	1.0159	1.12016	1.05758	1.04268	0.932418	1.01089	1.9646	2.53811	1.22177	1.90816	2.13418	2.7704	1.55564	2.15341
Amlexanox		1.461	1.628	1.525	1.538	1.056	1.104	1.191	1.117	0.995016	1.03292	1.06127	1.02974	1.004	0.991	1.019	1.00467	1.40797	1.55716	0.963745	1.30963	1.81022	1.4591	1.49929	1.58954	2.07407	2.55556	1.48148	2.03704	1.9882	1.67552	1.85841	1.84071	1.2217	1.16103	1.21074	1.19782	1.01362	0.983823	0.941784	0.979743	5.15393	1.96453	1.84863	2.98903	4.36914	3.09631	2.95938	3.47494
					#DIV/0!	#N/A	#N/A	#N/A	#N/A				#DIV/0!	#N/A	#N/A	#N/A	#N/A				#DIV/0!	#N/A	#N/A	#N/A	#N/A				#DIV/0!	#N/A	#N/A	#N/A	#N/A				#DIV/0!	#N/A	#N/A	#N/A	#N/A				#DIV/0!	#N/A	#N/A	#N/A	#N/A
					#DIV/0!	#N/A	#N/A	#N/A	#N/A				#DIV/0!	#N/A	#N/A	#N/A	#N/A				#DIV/0!	#N/A	#N/A	#N/A	#N/A				#DIV/0!	#N/A	#N/A	#N/A	#N/A				#DIV/0!	#N/A	#N/A	#N/A	#N/A				#DIV/0!	#N/A	#N/A	#N/A	#N/A
					#DIV/0!	#N/A	#N/A	#N/A	#N/A				#DIV/0!	#N/A	#N/A	#N/A	#N/A				#DIV/0!	#N/A	#N/A	#N/A	#N/A				#DIV/0!	#N/A	#N/A	#N/A	#N/A				#DIV/0!	#N/A	#N/A	#N/A	#N/A				#DIV/0!	#N/A	#N/A	#N/A	#N/A
					#DIV/0!	#N/A	#N/A	#N/A	#N/A				#DIV/0!	#N/A	#N/A	#N/A	#N/A				#DIV/0!	#N/A	#N/A	#N/A	#N/A				#DIV/0!	#N/A	#N/A	#N/A	#N/A				#DIV/0!	#N/A	#N/A	#N/A	#N/A				#DIV/0!	#N/A	#N/A	#N/A	#N/A
Pralidoxime chloride	49	1.349	1.033	1.186	1.18933	1.198	1.235	1.216	1.21633	1.04855	1.02151	1.03985	1.03664	1.025	1.025	1.049	1.033	0.653838	1.16479	0.69896	0.839195	0.812033	0.986603	0.784252	0.860963	0.88	1.2	0.826667	0.968889	1.02062	1.27835	1	1.09966	1.06489	1.14778	0.974022	1.06223	1.01548	1.08724	1.10733	1.07002	0.577334	0.513659	0.65882	0.583271	0	0	0	0
Indapamide		1.15	1.154	1.265	1.18967	1.474	0.978	1.345	1.26567	1.10303	1.06086	1.07076	1.07822	1.041	0.953	1.03	1.008	0.836983	0.764875	0.295952	0.632603	0.586833	1.08589	0.723597	0.798773	0.96	0.88	0.373333	0.737778	0.907216	1.1134	1.02062	1.01375	0.831734	0.882613	1.15436	0.956236	1.02654	1.0578	0.946562	1.0103	1.26489	0.64892	0.581974	0.831927	0	0	0	0
Mesalamine		1.264	1.258	1.276	1.266	1.052	1.305	1.181	1.17933	1.06846	1.06139	1.04358	1.05781	1.015	1.034	1.021	1.02333	0.486618	0.510064	0.69144	0.562707	0.925125	0.436755	0.748747	0.703542	0.613333	0.64	0.88	0.711111	1.02062	0.597938	0.927835	0.848797	1.38913	0.948798	0.992239	1.11006	1.05313	0.856737	1.0167	0.975522	0.660339	0.776265	0.516698	0.651101	0	0	0	0
Etodolac		1.062	1.188	1.173	1.141	1.202	1.061	1.068	1.11033	0.994923	1.0395	0.988642	1.00769	0.984	0.982	0.981	0.982333	1.10772	0.697633	1.04844	0.951264	0.64601	0.843265	0.91066	0.799978	1.17333	0.826667	1.22667	1.07556	0.814433	0.938144	1.02062	0.924399	0.848335	0.829147	0.806834	0.828105	0.960974	1.04633	0.960061	0.989123	0.460725	0.59597	0.498963	0.518552	0	0	0	0
Fluocinolone acetonide 21-acetate		1.239	1.196	1.223	1.21933	0.829	0.872	1.192	0.964333	1.09826	1.03378	1.07645	1.0695	0.895	0.938	1.056	0.963	2.54767	5.12143	3.51913	3.72941	3.28281	2.97444	2.17737	2.81154	3.14667	6.10667	4.29333	4.51556	2.85567	2.72165	2.72165	2.76632	0.839172	1.02522	0.99461	0.953002	0.958741	0.868511	1.04826	0.958505	4.92806	9.75431	7.41115	7.36451	0	0	0	0
Chlorzoxazone		1.371	1.165	1.089	1.20833	1.486	1.867	1.476	1.60967	1.08083	1.03597	1.0937	1.07016	1.032	1.076	1.043	1.05033	0.682592	0.964388	0.663128	0.770036	0.489356	0.473905	0.672639	0.5453	0.933333	1.12	0.72	0.924444	0.762887	0.927835	1.04124	0.910653	0.768136	1.00097	1.03503	0.934713	0.901599	1.14286	0.957625	1.00069	0.63109	1.55667	0.562573	0.916778	0	0	0	0
Cefuroxime		1.182	1.318	1.339	1.27967	1.564	1.333	1.19	1.36233	1.08908	1.07198	1.06498	1.07535	1.018	1.053	0.978	1.01633	1.96771	0.568016	0.538819	1.02485	0.515328	0.560204	0.966384	0.680639	2.32	0.746667	0.72	1.26222	0.845361	0.783505	1.20619	0.945017	0.984909	0.863533	1.01832	0.955589	0.920883	0.96676	0.998427	0.962023	0.901585	1.70258	0.48977	1.03131	0	0	0	0
Oxytetracycline hydrochloride		1.37	1.43	1.303	1.36767	1.424	1.3	0.887	1.20367	1.04307	1.06774	1.07749	1.06277	1.102	1.111	1.103	1.10533	0.66357	0.61712	0.717983	0.666224	0.441851	0.657516	0.509904	0.536424	0.906667	0.88	0.933333	0.906667	0.659794	0.896907	0.474227	0.676976	0.967231	0.948367	0.827423	0.91434	0.954885	0.943009	1.06582	0.987905	0.514618	0.447516	0.650312	0.537482	0	0	0	0
Toremifene citrate		0.159	0.105	0.109	0.124333	0.015	0.025	0.019	0.0196667	0.136093	0.0734098	0.0829237	0.0974756	0.187	0.697	0.805	0.563	0.840964	0.767087	0.97766	0.861904	3.9451	0.391387	0.513685	1.61672	0.133333	0.08	0.106667	0.106667	0.0618557	0.0103093	0.0103093	0.0274914	0.426539	0.382882	0.824081	0.544501	1.05801	0.545851	0.346511	0.650123	0.000172572	0.00126767	0.00126975	0.00090333	0	0	0	0
Griseofulvin		1.508	1.544	1.584	1.54533	1.498	1.522	1.486	1.502	1.09953	1.09812	1.13477	1.11081	1.031	1.048	1.044	1.041	0.23048	0.329131	0.438841	0.332817	0.865784	0.74924	0.767321	0.794115	0.346667	0.506667	0.693333	0.515556	1.36082	1.19588	1.19588	1.25086	1.19338	1.11415	0.965722	1.09109	0.999239	0.974575	0.898858	0.957557	0.314804	0.528327	0.389482	0.410871	0	0	0	0
Cefotaxime sodium		1.368	1.402	1.592	1.454	1.48	1.187	1.499	1.38867	1.09797	1.11179	1.09058	1.10012	1.077	1.016	1.062	1.05167	0.410529	2.06016	1.7474	1.40603	1.13569	1.19191	1.23268	1.18676	0.56	2.88	2.77333	2.07111	1.76289	1.48454	1.93814	1.72852	0.967339	1.11329	0.809098	0.963242	0.915301	0.962091	1.01903	0.965474	0.605803	6.16286	4.10026	3.62298	0	0	0	0
Cromolyn sodium		1.388	1.42	1.408	1.40533	1.537	1.281	1.271	1.363	1.03693	1.01113	0.997452	1.01517	1.069	1.035	1.022	1.042	0.982526	0.658704	0.683919	0.77505	0.889126	0.958823	0.750062	0.866004	1.36	0.933333	0.96	1.08444	1.43299	1.28866	1	1.24055	0.858791	0.818152	0.984909	0.887284	0.988176	0.948186	1.08084	1.00573	1.08738	0.860016	0.497306	0.8149	0	0	0	0
Primidone		1.343	1.187	1.416	1.31533	1.178	1.509	1.822	1.503	1.07094	1.03755	1.04023	1.04957	1.024	1.07	1.086	1.06	0.955541	0.563592	0.755585	0.758239	0.817293	0.918221	0.71209	0.815868	1.28	0.666667	1.06667	1.00444	1.01031	1.45361	1.36082	1.27491	0.97607	0.809745	0.972728	0.919514	1.1322	0.985537	1.11342	1.07705	0.301472	1.07809	1.30012	0.893226	0	0	0	0
Naltrexone hydrochloride		1.246	1.417	1.137	1.26667	1.359	1.721	1.58	1.55333	1.02968	1.0453	1.06254	1.04584	1.05	1.066	1.061	1.059	0.836983	0.792303	0.493696	0.707661	1.05581	0.536698	0.653242	0.748582	1.04	1.12	0.56	0.906667	1.50515	0.969072	1.08247	1.18557	1.02188	0.990191	1.17366	1.06191	1.0573	1.09251	0.998427	1.04941	0.420129	0.853342	0.499724	0.591065	0	0	0	0
Desipramine hydrochloride		0.244	0.255	0.45	0.316333	0.103	0.076	0.084	0.0876667	0.717345	0.89468	0.856648	0.822891	0.803	0.765	0.845	0.804333	1.31387	0.419376	0.119	0.617415	1.72023	0.258897	0.821895	0.933673	0.32	0.106667	0.0533333	0.16	0.185567	0.0206186	0.0721649	0.0927835	0.821494	0.564083	2.90665	1.43074	0.613854	0.347323	0.439584	0.46692	0.00213934	0.0187914	0.0310212	0.0173173	0	0	0	0
Floxuridine		1.278	1.37	1.253	1.30033	0.977	1.007	0.899	0.961	0.991921	1.02423	0.986402	1.00085	0.979	0.997	0.919	0.965	1.1086	0.683035	0.875028	0.888889	0.895373	1.06403	1.08194	1.01378	1.41333	0.933333	1.09333	1.14667	0.917526	1.12371	1.02062	1.02062	0.808128	0.89986	1.0249	0.910963	0.863131	1.01548	1.14194	1.00685	0.563738	0.955622	0.532849	0.68407	0	0	0	0
Zidovudine		1.133	1.117	1.232	1.16067	0.813	1.393	1.379	1.195	1.02707	1.00341	1.0572	1.02923	0.948	1.07	1.044	1.02067	1.48728	1.62796	1.34528	1.48684	1.34265	0.981014	0.997945	1.1072	1.68	1.81333	1.65333	1.71556	1.14433	1.43299	1.4433	1.34021	0.879379	1.04473	1.06651	0.996874	0.881807	0.967166	0.920883	0.923285	2.19093	2.96621	0.80219	1.98644	0	0	0	0
N-Methylparoxetine		0.174	0.185	0.05	0.136333	0.081	0.138	0.059	0.0926667	0.705591	0.679185	0.549142	0.644639	0.895	0.845	0.674	0.804667	0.153506	0	0	0.0511686	0.36262	0.14301	0.166023	0.223884	0.0266667	0	0	0.00888889	0.0309278	0.0206186	0.0103093	0.0206186	0.797025	0	0	0.265675	1.42411	0.534687	0.360721	0.773171	0.0134186	0.00902694	0.0304241	0.0176232	0	0	0	0
Erythromycin		1.399	1.454	1.529	1.46067	1.987	2.08	1.616	1.89433	1.02238	1.01304	1.00943	1.01495	1.084	1.103	1.056	1.081	0.344172	0.569785	0.821942	0.578633	0.524369	0.538835	0.882058	0.648421	0.48	0.826667	1.25333	0.853333	1.09278	1.17526	1.49485	1.2543	1.08257	1.07449	1.01261	1.05656	0.960467	0.99731	1.0373	0.998359	1.21383	1.09772	0.501637	0.937729	0	0	0	0
N-Fmoc-D-leucine		1.114	1.098	1.092	1.10133	1.524	1.382	1.101	1.33567	0.877073	0.94098	0.938001	0.918685	1.04	1.077	1.02	1.04567	1.99248	1.70537	1.88498	1.86095	0.806115	0.810882	0.884031	0.833676	2.21333	1.86667	2.05333	2.04444	1.28866	1.17526	1.02062	1.16151	0.768999	0.861162	0.870324	0.833495	0.989597	0.99325	0.96473	0.982526	0.659359	0.84509	0.354827	0.619759	0	0	0	0
L-Carnitine inner salt		1.191	1.141	1.176	1.16933	0.94	1.333	1.502	1.25833	0.989993	0.921479	1.00508	0.972185	1.029	1.044	1.075	1.04933	0.583499	1.40677	0.909091	0.966453	1.12928	0.560204	0.81795	0.835813	0.693333	1.6	1.06667	1.12	1.1134	0.783505	1.28866	1.06186	0.927455	0.909777	0.895979	0.91107	0.950419	1.00523	1.04288	0.999509	0.497998	0.744997	0.814113	0.685703	0	0	0	0
Dexamethasone sodium phosphate		1.374	1.402	1.324	1.36667	1.351	1.352	1.086	1.263	1.12717	1.11131	1.12825	1.12224	1.05	1.057	1.005	1.03733	1.98496	2.89847	2.18182	2.35508	1.20013	1.27229	1.23942	1.23728	2.72	4.05333	2.88	3.21778	1.70103	1.80412	1.41237	1.63918	0.797025	0.910639	1.05691	0.921526	0.908196	0.869627	0.878457	0.885427	7.60815	8.14795	7.36989	7.70867	0	0	0	0
Cilostazol		1.315	1.391	1.411	1.37233	1.738	1.975	1.656	1.78967	1.00444	0.979555	0.973551	0.985848	1.051	1.071	1.043	1.055	0.67109	0.749392	1.02367	0.814717	0.571053	0.815978	0.854771	0.747267	0.88	1.04	1.44	1.12	1.04124	1.69072	1.48454	1.4055	1.08645	0.901908	0.962811	0.983723	0.945141	0.904948	0.91185	0.920646	0.933687	1.02017	0.85648	0.936777	0	0	0	0
Natamycin		1.729	1.517	1.491	1.579	2.7	2.695	2.113	2.50267	0.960493	0.95726	0.944375	0.954042	1.155	1.155	1.155	1.155	0.38664	0.352577	0.322937	0.354051	0.480644	0.342895	0.432646	0.418728	0.666667	0.533333	0.48	0.56	1.36082	0.969072	0.958763	1.09622	0.568395	0.500701	0.644174	0.57109	0.86506	0.760315	0.691804	0.772393	0.0831954	0.0361444	0.0368029	0.0520476	0	0	0	0
Ziprasidone		1.008	1.163	0.843	1.00467	0.625	0.993	1.155	0.924333	0.802959	0.823949	0.809471	0.812126	0.853	0.943	0.972	0.922667	1.45853	0.758682	0.824596	1.01393	1.55585	0.821402	0.485247	0.954166	1.46667	0.88	0.693333	1.01333	1.02062	0.85567	0.587629	0.821306	0.746146	0.834214	0.718982	0.766447	0.656179	0.652931	0.742654	0.683921	0.308573	0.0373576	0.173698	0.173209	0	0	0	0
Gemcitabine hydrochloride		0.684	0.759	0.533	0.658667	0.38	0.386	0.417	0.394333	0.864672	0.937655	0.968714	0.92368	0.795	0.788	0.874	0.819	1.09533	1.23291	1.60495	1.31107	1.86094	1.75573	1.3678	1.66149	0.746667	0.933333	0.853333	0.844444	0.742268	0.71134	0.597938	0.683849	1.10079	0.958176	1.22723	1.0954	0.899264	0.762243	0.737072	0.799526	0.22904	0.443419	0.76895	0.48047	0	0	0	0
Doxycycline		1.442	1.714	1.612	1.58933	2.181	1.851	2.319	2.117	1.01905	1.09435	1.12127	1.07822	1.152	1.157	1.14	1.14967	9.25547	18.5158	17.4165	15.0626	4.92513	5.55897	3.65382	4.71264	13.3067	31.6533	28	24.32	11.268	10.7938	8.8866	10.3162	0.511911	0.550932	0.565053	0.542632	0.502817	0.530627	0.488911	0.507452	1.0925	0.922237	0.86786	0.960866	0	0	0	0
Pyrazinamide		1.029	0.954	0.968	0.983667	1.671	1.411	1.032	1.37133	0.976299	0.952792	1.0147	0.981264	1.058	1.025	0.997	1.02667	1.03915	1.28865	1.29883	1.20888	0.59423	0.814991	0.999918	0.803046	1.06667	1.22667	1.25333	1.18222	1.04124	1.20619	1.08247	1.10997	1.03115	0.91646	1.01865	0.988754	0.965948	1.07932	1.00218	1.01582	0.642381	0.869971	0.463894	0.658749	0	0	0	0
Dopamine hydrochloride	50	1.239	1.227	1.127	1.19767	1.089	1.173	1.058	1.10667	1.01562	1.03433	0.98937	1.01311	1.018	1.003	1.019	1.01333	0.682772	0.393851	0.830649	0.635757	0.741825	0.688979	0.840251	0.757019	0.918033	0.52459	1.01639	0.819672	0.89172	0.89172	0.980892	0.921444	1.06638	1.32523	0.942873	1.11149	0.955931	0.929923	0.815971	0.900608	0.352864	0.414473	0.465954	0.411097	0.646351	0.58681	0.886234	0.706465
5-Azacytidine		1.177	0.977	1.073	1.07567	0.797	0.919	0.87	0.862	1.04673	1.04369	1.03126	1.04056	0.951	1.006	0.99	0.982333	0.718887	0.61835	0.704246	0.680495	1.89761	1.45789	1.20775	1.52108	0.918033	0.655738	0.819672	0.797814	1.66879	1.47771	1.15924	1.43524	1.16364	0.694137	1.06294	0.97357	0.86028	0.882917	0.878967	0.874055	0.866967	1.72615	1.73174	1.44162	1.05759	0.866138	1.23612	1.05328
Propofol		0.932	1.281	1.164	1.12567	1.266	1.136	1.177	1.193	1.00703	0.969339	0.980307	0.985559	1.039	0.998	1.026	1.021	0.680332	0.919473	0.882382	0.827395	1.012	1.22955	0.853683	1.03174	0.688525	1.27869	1.11475	1.02732	1.41401	1.5414	1.10828	1.35456	0.855944	0.7688	0.866918	0.830554	0.953427	1.01199	0.918075	0.961165	0.440281	0.695587	0.594757	0.576875	0.969971	1.16308	1.04572	1.05959
Amoxicillin		1.31	1.36	1.26	1.31	0.901	1.131	1.11	1.04733	0.994637	1.03194	0.993179	1.00659	1	1.007	0.999	1.002	0.760859	0.577355	1.07857	0.805596	0.935594	0.897941	1.40416	1.07923	1.08197	0.852459	1.47541	1.13661	0.929936	1.12102	1.71975	1.2569	0.979559	0.95191	0.887036	0.939502	0.846409	0.99581	1.02548	0.955899	0.205313	0.504302	0.112588	0.274068	0.77408	0.355217	1.15582	0.761707
5-Fluorouracil		0.916	1.08	0.951	0.982333	0.568	0.679	0.634	0.627	1.04654	1.00503	1.00339	1.01832	0.828	0.837	0.882	0.849	0.725232	0.559297	0.825769	0.703433	1.87053	1.07123	1.71067	1.55081	0.721311	0.655738	0.852459	0.743169	1.17197	0.802548	1.19745	1.05732	0.807101	1.14244	0.793975	0.914506	0.820498	1.00978	0.78245	0.870908	0.87736	0.649632	1.84315	1.12338	1.2718	0.981542	1.14016	1.13117
Ampicillin sodium		1.125	1.318	0.993	1.14533	1.401	1.767	1.156	1.44133	1.00013	1.034	0.976142	1.00342	1.036	1.073	0.995	1.03467	0.966813	0.733529	1.24695	0.98243	0.996807	0.882087	1.03864	0.972513	1.18033	1.04918	1.34426	1.19126	1.5414	1.71975	1.32484	1.52866	1.03561	0.953631	0.953954	0.981065	0.900159	1.07778	0.886673	0.954872	0.913539	1.87329	0.934603	1.24048	0.67887	0.90326	1.04339	0.875172
DL-Penicillamine		1.258	1.369	1.268	1.29833	1.545	1.593	1.433	1.52367	1.03846	0.977022	0.965074	0.99352	1.064	1.049	1.028	1.047	0.576379	0.5959	1.31088	0.827721	0.821975	0.898382	0.845756	0.855371	0.786885	0.885246	1.80328	1.15847	1.40127	1.57962	1.33758	1.43949	0.902205	0.782571	0.899946	0.861574	0.89409	0.956991	1.06825	0.973109	0.330864	0.541865	1.00755	0.626759	0.708147	0.793574	0.618339	0.706687
Phylloquinone		1.42	1.538	1.19	1.38267	1.571	1.566	1.406	1.51433	1.01643	1.02433	1.00922	1.01666	1.035	1.038	1.023	1.032	0.531967	0.805271	0.584187	0.640475	0.646703	0.442365	0.541891	0.543653	0.819672	1.34426	0.754098	0.972678	1.12102	0.764331	0.840764	0.908705	0.842711	0.688112	0.815707	0.782177	0.900833	0.8283	0.841112	0.856748	0.92011	1.09405	0.133509	0.715889	0.581553	1.03067	0.634913	0.749044
Nicotine		1.337	1.303	1.321	1.32033	1.072	1.175	1.639	1.29533	1.00731	0.982322	0.985663	0.991765	0.996	0.989	1.026	1.00367	1.10737	0.834553	1.05222	0.998048	1.36739	1.06066	0.964659	1.1309	1.60656	1.18033	1.5082	1.43169	1.61783	1.3758	1.74522	1.57962	0.768478	0.728241	0.746208	0.747642	0.924722	0.953619	0.894379	0.92424	0.638425	0.758619	1.55866	0.985233	0.559695	0.7569	0.73024	0.682278
Mesna		1.164	1.252	0.98	1.132	1.594	1.421	1.498	1.50433	0.982678	0.958838	1.00385	0.981788	1.051	1.046	1.03	1.04233	1.24549	1.20644	0.924353	1.12543	0.890675	0.836948	0.909391	0.879005	1.57377	1.63934	0.983607	1.39891	1.56688	1.3121	1.50318	1.46072	1.04422	0.878322	0.917805	0.946781	1.0353	0.786977	0.897077	0.906452	0.678491	1.32383	1.32521	1.10918	0.510029	0.926482	1.14481	0.860439
Captopril		1.122	1.487	1.19	1.26633	1.602	1.401	1.962	1.655	1.02072	1.01199	1.05792	1.03021	1.042	1.047	1.083	1.05733	1.05027	0.812592	0.837482	0.900114	0.727953	0.947264	0.600022	0.758413	1.27869	1.31148	1.08197	1.22404	1.28662	1.46497	1.29936	1.35032	0.935126	0.954707	0.813125	0.900986	1.08472	0.965082	0.972692	1.0075	0.385091	1.63553	0.564054	0.861558	0.852346	0.672706	0.650069	0.72504
Demeclocycline		1.835	1.705	1.671	1.737	1.989	2.117	1.71	1.93867	0.999715	0.963559	0.979471	0.980915	1.028	1.041	1.03	1.033	0.296242	0.141532	0.198633	0.212136	0.336673	0.398106	0.472751	0.40251	0.590164	0.262295	0.360656	0.404372	0.738854	0.929936	0.89172	0.853503	0.908015	0.652501	0.803981	0.788166	0.955353	0.86211	1.04715	0.954872	0.127717	0.157594	0.0712891	0.118867	0.407974	0.292815	0.791726	0.497505
Quinacrine hydrochloride hydrate		0.154	0.276	0.281	0.237	0.027	0.087	0.053	0.0556667	0.465077	0.684081	0.544492	0.56455	0.767	0.858	0.835	0.82	52.3324	43.8799	48.1591	48.1238	15.6675	18.8356	15.0428	16.5153	8.7541	13.1475	14.6885	12.1967	0.471338	1.80892	0.878981	1.05308	0.556643	0.50737	0.539107	0.534373	0.5321	0.533642	0.525261	0.530334	0.00146497	0.00191083	0.00226967	0.00188182	0.000775399	0.000465747	0.000455209	0.000565452
Zanamivir hydrate		1.354	1.401	1.037	1.264	1.999	1.594	1.689	1.76067	1.0015	1.00038	1.02176	1.00788	1.053	1.034	1.055	1.04733	1.07125	0.948267	0.786725	0.935416	0.531322	0.738523	0.772212	0.680686	1.57377	1.44262	0.885246	1.30055	1.17197	1.29936	1.43949	1.30361	0.801829	0.744164	0.878322	0.808105	0.978182	0.92896	1.03656	0.981233	0.293014	1.04407	1.41573	0.917605	0.55127	0.562129	0.5615	0.5583
alpha-Methyl-L-tyrosine		1.304	1.438	1.463	1.40167	1.458	1.528	1.465	1.48367	1.01996	0.968748	1.01879	1.0025	1.044	1.057	1.045	1.04867	0.370425	0.714495	0.578331	0.554417	0.879225	0.891335	0.961136	0.910566	0.52459	1.11475	0.918033	0.852459	1.41401	1.50318	1.55414	1.49045	1.2085	0.848198	0.793437	0.950045	0.968261	0.951115	0.915378	0.944918	0.759948	0.517325	0.795853	0.691042	0.580358	0.653426	0.772307	0.668697
Olmesartan medoxomil		1.5	1.332	1.293	1.375	2.246	2.208	1.585	2.013	0.910468	0.866172	0.885369	0.887336	1.072	1.074	1.012	1.05267	0.583699	0.70327	0.397267	0.561412	0.174832	0.2301	0.254762	0.219898	0.95082	1.01639	0.557377	0.84153	0.433121	0.56051	0.44586	0.47983	0.845831	1.02216	0.765358	0.877784	1.004	0.857583	0.895054	0.918878	0.239735	0.144486	0.450664	0.278295	0.429783	0.400566	0.677393	0.50258
Fenpiverinium bromide		1.308	1.477	1.331	1.372	0.866	1.005	1.353	1.07467	0.97445	0.965163	1.00319	0.980934	0.964	1.031	1.03	1.00833	0.808199	1.10395	0.88531	0.932487	1.35946	0.9193	1.07498	1.11791	1.14754	1.77049	1.27869	1.39891	1.29936	1.01911	1.6051	1.30786	1.11286	0.949973	0.790963	0.951264	0.972307	0.988296	0.871165	0.943923	0.952559	2.59526	0.929621	1.49248	1.17698	1.12076	0.713572	1.00377
Amisulpride		1.416	1.334	1.009	1.253	1.408	1.366	1.333	1.369	0.956311	0.955464	1.01719	0.97632	1.042	1.043	1.04	1.04167	0.789165	0.815032	0.628599	0.744265	0.819773	1.20026	0.935154	0.985064	1.21311	1.18033	0.688525	1.02732	1.27389	1.80892	1.3758	1.4862	0.822808	0.887682	1.0426	0.917698	0.821076	0.937051	0.87261	0.876912	0.735783	0.991851	0.851282	0.859639	1.12665	0.605629	0.745773	0.826018
Ketorolac tromethamine		0.969	1.174	1.222	1.12167	1.453	1.442	1.462	1.45233	0.986854	0.952669	0.957814	0.965779	1.052	1.039	1.042	1.04433	0.841874	0.694485	1.06296	0.866439	0.731036	0.880766	0.718485	0.776762	0.885246	0.885246	1.40984	1.06011	1.17197	1.40127	1.15924	1.24416	0.715761	0.830662	0.954061	0.833495	0.962578	0.995136	0.862496	0.94007	0.453875	0.618695	0.732568	0.601713	0.697317	0.670455	0.784828	0.717533
Ethylestrenol		1.573	1.424	1.178	1.39167	1.377	1.21	0.662	1.083	1.00614	0.897094	0.934452	0.945896	1.036	1.017	0.934	0.995667	0.38409	1.06101	1.20547	0.88352	0.939117	0.89684	1.23792	1.02462	0.655738	1.63934	1.54098	1.27869	1.42675	1.19745	0.904459	1.17622	0.961054	0.868854	0.967832	0.93258	0.865	0.884651	0.824736	0.858129	0.655589	0.432409	0.183198	0.423732	0.86813	0.821292	0.9855	0.891641
5-Methoxytryptamine		1.319	1.187	1.432	1.31267	1.312	1.621	1.657	1.53	0.972946	0.930633	0.95326	0.95228	0.999	1.043	1.026	1.02267	0.480722	0.712543	0.54856	0.580608	0.677309	0.434438	0.536607	0.549451	0.688525	0.918033	0.852459	0.819672	0.980892	0.77707	0.980892	0.912951	0.745885	1.09952	0.768908	0.871436	0.899774	1.07441	0.745653	0.906613	0.519875	0.375542	0.820694	0.572037	0.594536	0.533499	0.490629	0.539555
Tadalafil		1.426	1.452	1.284	1.38733	1.423	1.353	1.183	1.31967	0.998	1.01905	1.07003	1.02903	1.023	1.046	1.013	1.02733	1.35578	1.74768	1.15227	1.41858	1.11109	1.34845	1.04393	1.16782	2.09836	2.7541	1.60656	2.15301	1.74522	2.01274	1.36306	1.70701	0.815923	0.928564	0.870468	0.871651	0.953716	0.852767	0.917594	0.908025	1.45802	3.82112	3.09847	2.79253	1.59077	2.03961	1.72497	1.78512
Citalopram hydrobromide		0.713	1.115	1.231	1.01967	1.06	1.096	0.995	1.05033	0.949184	0.923696	0.937158	0.936679	1.011	1.008	1.033	1.01733	0.974622	1.70717	0.93265	1.20482	1.07806	0.769129	0.916878	0.921355	0.754098	2.06557	1.2459	1.35519	1.26115	0.929936	1.00637	1.06582	0.799032	1.0837	0.77106	0.884597	0.897173	0.768964	0.799499	0.821879	0.520833	0.463614	0.341426	0.441958	0.511969	0.396894	0.522277	0.477046
Nimodipine		1.201	1.086	1.128	1.13833	1.077	0.784	0.88	0.913667	0.894244	0.893854	0.869658	0.885919	1.003	1.004	1	1.00233	0.830161	0.751098	1.01806	0.866439	0.889794	1.28063	1.04987	1.07343	1.08197	0.885246	1.2459	1.07104	1.05732	1.10828	1.01911	1.06157	0.976116	0.798279	0.883486	0.88596	0.750277	0.844965	0.840437	0.811893	0.289452	0.354823	0.336652	0.326976	0.737061	0.948366	0.75895	0.814792
Topiramate		1.464	1.115	1.338	1.30567	1.192	1.513	1.298	1.33433	1.03205	0.983046	0.997622	1.00424	1.027	1.041	1.014	1.02733	0.763299	0.894095	1.15129	0.936229	0.997248	1.03006	1.01376	1.01369	1.21311	1.08197	1.67213	1.3224	1.3121	1.71975	1.45223	1.49469	0.886928	0.947606	0.922001	0.918845	0.997062	1.06642	0.898521	0.987333	1.36613	0.998716	2.53893	1.63459	1.25908	0.987785	0.877887	1.04158
Artesunate		1.243	1.307	1.091	1.21367	1.699	1.832	1.76	1.76367	0.93217	0.920979	0.975819	0.942989	1.024	1.035	1.053	1.03733	1.40947	0.786237	1.16252	1.11941	0.584388	0.466366	0.603545	0.551433	1.90164	1.11475	1.37705	1.46448	1.09554	0.942675	1.17197	1.07006	0.815062	0.983002	1.01711	0.93839	0.789963	0.897462	0.902278	0.863234	0.635615	0.594186	2.3361	1.18863	0.459251	0.539021	0.756341	0.584871
Isoquercitrin		1.176	1.157	1.105	1.146	1.387	1.519	1.592	1.49933	0.934753	0.914621	0.91088	0.920085	1.069	1.081	1.082	1.07733	0.95022	0.7306	1.14788	0.942899	0.782561	0.531763	0.826599	0.713641	1.21311	0.918033	1.37705	1.1694	1.19745	0.89172	1.45223	1.18047	0.823561	0.934804	0.870253	0.876206	0.909599	0.873958	0.813563	0.865707	0.483309	0.377272	0.805329	0.555303	0.763325	0.767961	0.819167	0.783484
Rizatriptan benzoate		1.145	0.975	0.949	1.023	1.453	1.671	1.058	1.394	1.00155	0.942414	0.997365	0.980444	1.044	1.047	1.006	1.03233	0.738897	1.42557	0.79551	0.98666	0.913795	0.656171	1.01486	0.86161	0.918033	1.5082	0.819672	1.08197	1.46497	1.21019	1.18471	1.28662	1.07649	0.846477	0.883055	0.935342	0.966142	1.07075	0.901122	0.979338	1.07592	1.31091	1.92401	1.43695	0.91724	0.426651	0.804215	0.716036
Levetiracetam	51	1.574	1.596	1.805	1.65833	1.69	1.436	1.7	1.60867	1.04576	1.05729	1.07523	1.05943	1.069	1.034	1.066	1.05633	0.645968	0.700649	0.544486	0.630368	0.661341	1.09232	1.01365	0.922439	1	1.1	0.966667	1.02222	1.07389	1.50739	1.65517	1.41215	0.986688	1.09394	0.975496	1.01871	1.13336	1.18457	1.02444	1.11413	1.18332	1.33926	0.219498	0.914026	1.35	1.26351	1.41263	1.34205
Flurbiprofen		1.484	1.445	1.38	1.43633	1.702	1.432	1.191	1.44167	1.00008	1.01033	1.00592	1.00544	1.063	1.052	1.018	1.04433	0.981928	0.750232	0.663114	0.798424	0.530286	0.759227	1.00738	0.765632	1.43333	1.06667	0.9	1.13333	0.866995	1.04433	1.15271	1.02135	0.733062	0.86922	0.879978	0.82742	0.94357	1.01392	0.927476	0.961655	1.67923	0.937452	0.526069	1.04758	0.97016	1.21504	1.04268	1.07596
Xanthinol nicotinate		1.526	1.398	1.313	1.41233	1.038	1.311	1.473	1.274	1.02585	1.02525	1.02288	1.02466	0.982	1.02	1.039	1.01367	0.488415	0.533364	1.05839	0.693389	1.0177	0.938416	0.758621	0.904911	0.733333	0.733333	1.36667	0.944444	1.01478	1.18227	1.07389	1.09031	0.794023	0.897691	1.10492	0.93221	1.13326	1.0043	0.977782	1.03845	0.524794	0.155166	0.432228	0.37073	1.12458	1.25085	0.759941	1.04512
Finasteride		1.396	1.402	0.938	1.24533	1.448	1.379	1.726	1.51767	1.02804	0.984879	0.973406	0.995441	1.044	1.014	1.063	1.04033	1.23818	1.23262	0.830862	1.10056	0.722217	0.833047	0.754576	0.769946	1.7	1.7	0.766667	1.38889	1.00493	1.10345	1.25123	1.11987	0.823907	0.863244	0.828362	0.838504	1.0704	0.87383	0.919682	0.954637	0.521064	0.751374	0.397513	0.55665	0.780988	0.757813	0.690824	0.743209
Pantoprazole sodium		1.245	1.495	1.7	1.48	1.49	1.81	1.366	1.55533	1.02303	1.03086	1.06751	1.04047	1.044	1.062	1.029	1.045	0.871177	1.13346	0.418443	0.807692	0.736374	0.498736	0.833249	0.689453	1.06667	1.66667	0.7	1.14444	1.05419	0.866995	1.0936	1.00493	0.924423	0.909861	0.90019	0.911491	0.951566	1.12445	0.903791	0.993269	0.814095	1.36688	0.221758	0.800912	0.646204	0.859437	0.834322	0.779988
Oxcarbazepine		1.912	1.839	1.797	1.84933	1.397	1.38	1.202	1.32633	1.04541	1.01291	1.01567	1.02466	1.034	1.021	1.018	1.02433	0.354495	0.331789	0.339666	0.341983	0.645768	0.624128	0.639701	0.636532	0.666667	0.6	0.6	0.622222	0.866995	0.827586	0.738916	0.811166	0.710785	0.612877	0.763597	0.695753	1.10471	1.01706	0.755807	0.959192	0.41817	0.226003	0.344679	0.329617	0.593064	0.996382	1.51124	1.03356
Icariin		1.657	1.376	1.419	1.484	0.342	1.392	1.146	0.96	1.00611	0.970787	0.994805	0.990566	1.017	1.028	1.02	1.02167	0.490732	0.812326	1.07414	0.7924	1.89038	1.15623	1.315	1.45387	0.8	1.1	1.5	1.13333	0.62069	1.5468	1.44828	1.20525	0.855963	1.05189	0.792719	0.90019	0.849132	0.86472	0.90541	0.873087	0.709829	0.26791	0.941644	0.639794	1.43072	1.28408	1.22994	1.31491
Zeranol		1.503	1.51	1.099	1.37067	1.469	1.459	1.466	1.46467	1.00446	1.00834	0.983434	0.998745	1.032	1.047	1.049	1.04267	1.21779	0.807692	0.801668	0.942385	1.06077	0.576398	0.937405	0.858193	1.8	1.2	0.866667	1.28889	1.49754	0.807882	1.3202	1.20854	0.870416	1.08134	0.882804	0.944852	0.866643	0.919682	1.02657	0.937632	0.678165	2.63317	0.334256	1.2152	1.84717	0.9848	1.11018	1.31405
Tiagabine hydrochloride		1.312	1.531	1.779	1.54067	1.681	1.425	1.574	1.56	1.0203	1.01001	1.04009	1.02347	1.067	1.045	1.061	1.05767	0.439296	0.973587	0.514365	0.642416	0.63424	0.712307	0.534331	0.626959	0.566667	1.46667	0.9	0.977778	1.02463	0.975369	0.807882	0.935961	0.826515	0.885412	0.761098	0.824341	0.951566	0.857837	0.996407	0.93527	0.645924	0.678508	0.777747	0.700726	0.707458	0.766717	0.884701	0.786292
Zafirlukast		1.576	1.452	1.473	1.50033	1.972	1.692	1.436	1.7	0.975134	0.932462	0.963312	0.956969	1.061	1.012	1.017	1.03	0.516219	0.559778	0.597776	0.557924	0.24957	0.278896	0.435636	0.321367	0.8	0.8	0.866667	0.822222	0.472906	0.453202	0.600985	0.509031	0.738821	0.750992	0.815539	0.768451	0.90288	0.836176	0.958652	0.899236	0.265125	0.282949	0.307873	0.285316	0.682517	0.65084	0.718341	0.683899
Ezetimibe		0.975	1.279	1.117	1.12367	0.272	0.533	0.613	0.472667	0.965694	0.984574	1.1107	1.02032	1.012	1.019	1.048	1.02633	0.417053	0.26506	0.515755	0.399289	1.8111	1.25088	1.23794	1.43331	0.4	0.333333	0.566667	0.433333	0.472906	0.640394	0.729064	0.614122	0.752078	1.03255	0.633741	0.806122	0.952174	0.757022	0.868971	0.859389	0.448221	0.500059	0.70653	0.551603	1.08731	1.35431	1.40654	1.28272
Pterostilbene		0.941	0.936	0.913	0.93	0.736	0.493	0.492	0.573667	0.864225	0.848654	0.737722	0.816867	1.023	0.947	1.003	0.991	2.73633	3.3304	1.96617	2.67763	1.29538	1.62302	1.87643	1.59827	2.53333	3.06667	1.76667	2.45556	0.916256	0.768473	0.8867	0.857143	0.929313	1.11524	1.05721	1.03392	1.07617	0.999038	1.03163	1.03561	0.868269	0.943224	1.13595	0.982481	2.12951	2.25472	2.30745	2.23056
Ramipril		1.389	1.623	1.648	1.55333	1.313	1.525	1.834	1.55733	1.04421	1.0356	1.02845	1.03609	1.052	1.031	1.075	1.05267	0.536608	0.563485	1.02827	0.709453	0.976034	0.746486	0.519769	0.74743	0.733333	0.9	1.66667	1.1	1.23153	1.0936	0.916256	1.08046	0.955284	0.987884	0.808367	0.917178	1.01645	0.98922	0.946101	0.983923	0.355418	0.779128	0.466583	0.53371	0.49327	0.665226	0.747647	0.635381
Risperidone		1.724	1.833	1.588	1.715	1.762	1.79	1.355	1.63567	1.00181	0.984156	0.958671	0.981544	1.043	1.055	1.017	1.03833	0.825301	0.536145	0.426784	0.596077	0.628577	0.584488	0.66579	0.626285	1.4	0.966667	0.666667	1.01111	1.06404	1.00493	0.866995	0.978654	0.902907	0.870959	1.00733	0.927067	0.94104	1.04003	1.0537	1.01159	0.37153	0.589178	0.394998	0.451902	1.02338	0.641114	1.35316	1.00589
Temozolomide		1.665	1.516	1.43	1.537	1.166	1.25	1.141	1.18567	0.999265	0.986471	0.976783	0.987506	1.043	1.031	0.984	1.01933	0.753012	0.335496	0.924004	0.670837	0.897361	0.927091	1.10567	0.976708	1.23333	0.5	1.3	1.01111	1.00493	1.1133	1.21182	1.11002	1.00549	1.12611	0.806737	0.979444	1.03305	1.03811	0.880308	0.983822	0.375195	0.103959	0.421432	0.300195	0.64769	0.653385	1.12129	0.807456
Alfuzosin		1.438	1.58	1.348	1.45533	1.528	1.416	1.658	1.534	0.994793	0.994838	0.965073	0.984902	1.05	1.032	1.061	1.04767	1.27294	0.900834	1.48285	1.21888	0.684599	0.811204	0.655678	0.71716	1.8	1.4	1.96667	1.72222	1.00493	1.10345	1.04433	1.0509	0.911491	0.815539	0.827384	0.851472	0.972519	0.954907	0.958044	0.961823	0.548376	0.388698	1.10908	0.682052	0.80895	0.915203	0.604419	0.776191
Latanoprost		1.737	1.88	1.623	1.74667	1.477	1.441	1.551	1.48967	1.08735	1.11426	1.09765	1.09976	1.08	1.039	1.064	1.061	0.429101	0.0542169	0.0834106	0.188909	0.416625	0.327435	0.35049	0.36485	0.733333	0.1	0.133333	0.322222	0.591133	0.453202	0.522167	0.522167	0.558653	0.437381	0.569084	0.521706	0.95602	0.809353	0.924946	0.896773	0.330775	0.256377	0.226741	0.271297	0.471243	1.20944	0.973457	0.884714
Zaleplon		1.675	1.561	1.449	1.56167	1.377	1.525	1.199	1.367	1.02613	1.03553	1.001	1.02089	1.025	1.043	1.037	1.035	0.384615	0.390639	1.16914	0.648131	0.960663	0.941248	1.07797	0.993292	0.633333	0.6	1.66667	0.966667	1.27094	1.37931	1.24138	1.29721	0.862918	0.981907	0.99712	0.947315	0.910471	0.882838	1.00278	0.932031	0.652468	1.00229	0.438056	0.697603	0.946086	1.35326	1.22972	1.17636
Benzbromarone		1.414	1.273	1.518	1.40167	1.028	1.103	1.277	1.136	1.00074	0.956661	0.937182	0.964862	1.005	1.005	1.01	1.00667	0.814643	0.878128	1.1608	0.951189	0.9279	0.901608	0.74689	0.858799	1.13333	1.1	1.73333	1.32222	0.916256	0.955665	0.916256	0.929392	1.09242	0.855094	1.02211	0.989876	0.99418	0.920796	0.949036	0.95467	0.192392	0.35454	0.295461	0.280798	0.703305	0.678226	0.560545	0.647359
Olopatadine hydrochloride		1.409	1.476	0.992	1.29233	1.093	1.89	1.449	1.47733	1.00203	1.0179	1.0176	1.01251	1.017	1.089	1.035	1.047	1.443	0.619555	1.09361	1.05205	0.882192	0.716149	1.02639	0.874912	2	0.9	1.06667	1.32222	0.926108	1.30049	1.42857	1.21839	0.869003	0.972344	1.37006	1.07047	1.0953	1.05775	0.96017	1.03774	0.65773	0.513694	0.406093	0.525839	1.14994	0.832656	1.03077	1.00446
Triclabendazole		1.099	1.135	1.177	1.137	0.779	0.934	1.114	0.942333	0.906062	0.908004	0.91654	0.910202	1.015	1.026	1.081	1.04067	1.07924	1.28406	0.604727	0.989342	1.13156	0.790575	0.754576	0.892237	1.16667	1.43333	0.7	1.1	0.847291	0.70936	0.807882	0.788177	1.04591	0.846944	0.97267	0.955175	0.834354	0.922314	0.795486	0.850718	0.239635	0.523521	0.64013	0.467762	1.0303	0.64206	1.62491	1.09909
Desloratadine		0.156	0.146	0.121	0.141	0.065	0.048	0.011	0.0413333	0.28494	0.289389	0.42855	0.334293	0.905	0.84	0.208	0.651	0.86608	0.465709	1.11677	0.816188	1.41106	0	0	0.470354	0.133333	0.0666667	0.133333	0.111111	0.08867	0	0	0.0295567	0.786525	0.770443	1.17544	0.910803	0.441925	0	0	0.147308	0.00231813	0.0146578	0.00096309	0.00597967	0.0402949	0.00123052	0.0998292	0.0471182
Rofecoxib		1.392	1.231	1.086	1.23633	1.2	1.345	1.156	1.23367	1.01111	0.952065	0.972548	0.978574	1.025	1.045	1.004	1.02467	0.462465	0.936052	1.59129	0.996602	1.07655	1.01385	1.06482	1.05174	0.633333	1.13333	1.7	1.15556	1.24138	1.31034	1.18227	1.24466	0.796523	0.784135	0.825645	0.802101	1.00015	0.932537	0.986082	0.972924	0.397085	0.42188	0.589377	0.469448	0.927702	1.03189	0.908702	0.956098
Linezolid		1.504	1.547	1.356	1.469	1.254	1.282	1.265	1.267	1.08747	1.08275	1.08534	1.08518	1.042	1.06	1.059	1.05367	2.90593	2.30074	3.54912	2.9186	1.35706	1.40803	1.7023	1.48913	4.3	3.5	4.73333	4.17778	1.63547	1.73399	2.06897	1.81281	1.06515	0.961152	0.952459	0.992919	1.00187	0.912799	0.944481	0.953051	4.78746	6.37463	6.33991	5.834	4.21217	4.67475	6.93283	5.27325
					#DIV/0!	#N/A	#N/A	#N/A	#N/A				#DIV/0!	#N/A	#N/A	#N/A	#N/A				#DIV/0!	#N/A	#N/A	#N/A	#N/A				#DIV/0!	#N/A	#N/A	#N/A	#N/A				#DIV/0!	#N/A	#N/A	#N/A	#N/A				#DIV/0!	#N/A	#N/A	#N/A	#N/A
					#DIV/0!	#N/A	#N/A	#N/A	#N/A				#DIV/0!	#N/A	#N/A	#N/A	#N/A				#DIV/0!	#N/A	#N/A	#N/A	#N/A				#DIV/0!	#N/A	#N/A	#N/A	#N/A				#DIV/0!	#N/A	#N/A	#N/A	#N/A				#DIV/0!	#N/A	#N/A	#N/A	#N/A
					#DIV/0!	#N/A	#N/A	#N/A	#N/A				#DIV/0!	#N/A	#N/A	#N/A	#N/A				#DIV/0!	#N/A	#N/A	#N/A	#N/A				#DIV/0!	#N/A	#N/A	#N/A	#N/A				#DIV/0!	#N/A	#N/A	#N/A	#N/A				#DIV/0!	#N/A	#N/A	#N/A	#N/A
					#DIV/0!	#N/A	#N/A	#N/A	#N/A				#DIV/0!	#N/A	#N/A	#N/A	#N/A				#DIV/0!	#N/A	#N/A	#N/A	#N/A				#DIV/0!	#N/A	#N/A	#N/A	#N/A				#DIV/0!	#N/A	#N/A	#N/A	#N/A				#DIV/0!	#N/A	#N/A	#N/A	#N/A
Lamotrigine	61	1.005	0.873	0.939	0.939	1.024	1.154	1.146	1.108	1.02542	1.01176	1.02072	1.0193	0.94	0.999	0.993	0.977333	0.857448	1.19084	0.851033	0.966441	1.20444	1.3081	1.01913	1.17722	0.814371	0.982036	0.754491	0.850299	1.4902	1.82353	1.41176	1.57516	1.14298	1.11911	1.36257	1.20822	1.24487	1.18165	1.01158	1.14603	1.41294	1.5964	1.23226	1.41386	0.781581	1.18768	0.72848	0.899248
Diclofenac sodium		0.843	0.952	0.892	0.895667	0.945	1.137	1.061	1.04767	1.00287	1.01484	1.01009	1.00927	1.025	1.014	0.968	1.00233	1.39843	0.62598	1.23717	1.08719	1.08152	1.02738	1.28538	1.13143	1.11377	0.562874	1.04192	0.906188	1.23529	1.41176	1.64706	1.43137	1.1172	1.11566	1.1786	1.13715	1.05765	0.983398	0.898364	0.979804	1.11747	2.01033	1.15519	1.42766	1.20117	1.79018	1.15137	1.38091
Bupropion hydrochloride		1.007	1.343	1.55	1.3	1.379	1.119	1.048	1.182	0.997895	1.04522	1.04211	1.02841	1.028	0.966	1.009	1.001	0.894155	0.783321	0.408945	0.695474	0.612114	0.609097	0.882893	0.701368	0.850299	0.994012	0.598802	0.814371	1.01961	0.823529	1.11765	0.986928	0.885867	1.04532	1.03919	0.990127	0.982295	0.812351	0.967347	0.920664	1.08105	0.875443	0.593096	0.849863	0.529155	0.621939	0.635599	0.595564
Rifaximin		0.796	1.082	1.015	0.964333	1.011	0.826	0.783	0.873333	1.03628	1.06926	1.07669	1.06074	0.999	1.003	1.001	1.001	0.971311	0.750356	0.662331	0.794666	0.962947	0.903217	1.099	0.988388	0.730539	0.766467	0.634731	0.710579	1.17647	0.901961	1.03922	1.03922	0.92072	1.08554	1.04392	1.01672	1.14942	1.0503	0.853397	1.01771	1.68106	1.17418	1.71922	1.52482	1.28547	1.47882	1.62496	1.46308
Dofetilide		1.404	1.289	1.304	1.33233	1.291	0.848	1.944	1.361	1.07031	1.08903	1.08727	1.0822	1.035	0.839	1.023	0.965667	0.695474	0.619922	0.78742	0.700938	0.792012	1.24331	0.768138	0.934487	0.922156	0.754491	0.97006	0.882236	1.23529	1.27451	1.80392	1.43791	0.906422	1.19954	1.03575	1.04724	1.14844	1.05103	0.997611	1.06569	0.809087	1.21184	0.849583	0.956837	0.88262	0.604922	0.583881	0.690474
Famciclovir		1.206	1.456	0.939	1.20033	1.3	0.945	1.141	1.12867	1.05475	1.05634	1.03304	1.04804	1.013	0.978	0.908	0.966333	1.01978	1.14095	0.836957	0.999228	1.02356	0.703794	1.0667	0.931351	1.16168	1.56886	0.742515	1.15768	1.60784	0.803922	1.47059	1.29412	1.04353	1.0074	1.03434	1.02843	0.966612	0.882191	0.987809	0.945537	2.04315	0.846795	2.11528	1.66841	0.312406	0.391227	0.438471	0.380701
Cefaclor		1.089	1.113	1.597	1.26633	1.882	1.393	1.26	1.51167	0.995221	1.01633	1.05456	1.02204	1.037	1.046	1.045	1.04267	0.861903	0.740556	0.579651	0.72737	0.724473	0.885201	0.850144	0.819939	0.886228	0.778443	0.874251	0.846307	1.64706	1.4902	1.29412	1.47712	1.0872	0.983914	1.05758	1.0429	0.88072	1.0476	0.996508	0.974943	0.800021	0.964541	1.47478	1.07978	0.454449	0.676769	0.461239	0.530819
Brucine		1.04	1.41	1.481	1.31033	1.437	1.057	1.167	1.22033	1.02101	1.09565	1.06793	1.06153	1.084	0.895	1.068	1.01567	1.1944	0.935495	0.702067	0.943989	0.914577	0.859907	0.639893	0.804793	1.17365	1.24551	0.982036	1.13373	1.58824	1.09804	0.901961	1.19608	1.07915	1.07392	1.09971	1.08426	0.95828	1.03327	1.14391	1.04515	0.920232	3.36495	0.848539	1.71124	0.197469	1.28249	0.600604	0.69352
Cefpodoxime proxetil		1.355	1.157	1.41	1.30733	0.805	1.192	0.876	0.957667	1.08067	1.07328	1.08053	1.07816	1.063	0.967	0.941	0.990333	1.00089	0.942445	0.881504	0.941613	1.04886	1.11622	0.94493	1.03667	1.28144	1.02994	1.17365	1.16168	1.01961	1.60784	1	1.20915	1.0526	1.06422	1.02796	1.04826	0.913558	1.13582	0.904368	0.984582	1.13255	0.987334	1.29589	1.13859	0.890447	0.962944	0.469764	0.774385
Irsogladine maleate		1.288	1.453	1.018	1.253	1.15	1.028	1.519	1.23233	1.08008	1.08043	1.05273	1.07108	0.857	0.897	1.017	0.923667	1.05346	0.802744	0.847292	0.901164	1.18527	1.38966	1.02525	1.20006	1.28144	1.1018	0.814371	1.06587	1.64706	1.72549	1.88235	1.75163	1.05324	1.13864	1.1209	1.10426	1.03057	0.939166	0.875329	0.948355	0.935852	0.634269	0.77402	0.781381	0.772539	0.549384	0.624197	0.648707
L-694,247		0.84	0.948	1.128	0.972	1.424	1.658	1.086	1.38933	0.91843	0.989123	1.03268	0.980079	0.976	0.992	0.982	0.983333	0.513008	0.695652	0.550784	0.586481	0.831684	0.616463	0.687286	0.711811	0.407186	0.622754	0.586826	0.538922	1.43137	1.23529	0.901961	1.18954	1.03115	1.09894	0.906166	1.01209	0.930099	0.831342	0.872511	0.877984	0.52137	0.243017	0.508907	0.424431	0.512986	0.513092	0.590276	0.538785
Amiodarone hydrochloride		0.978	0.94	0.848	0.922	1.435	1.028	0.986	1.14967	1.03523	0.995613	1.03084	1.02056	0.918	0.918	0.923	0.919667	0.479865	0.404669	0.568068	0.484201	0.26004	0.457954	0.312847	0.343614	0.443114	0.359281	0.45509	0.419162	0.45098	0.568627	0.372549	0.464052	0.825227	1.03179	0.903613	0.920209	1.14918	0.883906	0.767996	0.933693	2.90335	2.19181	0.16073	1.75196	0.362805	0.499737	0.34848	0.403674
Tocainide		1.316	1.537	1.284	1.379	0.516	1.34	0.73	0.862	1.05111	1.06836	1.04853	1.056	0.947	0.952	0.836	0.911667	1.03065	1.13026	0.81985	0.993585	1.57355	0.956556	1.46803	1.33271	1.28144	1.64072	0.994012	1.30539	0.980392	1.54902	1.29412	1.27451	1.01443	0.923401	1.024	0.987276	1.18275	0.943577	0.937328	1.02122	1.17306	1.06192	0.777535	1.00417	0.657575	0.821864	0.673731	0.717723
Cefdinir		1.49	1.218	0.86	1.18933	0.576	0.642	0.625	0.614333	1.10038	1.05168	1.01252	1.05486	1.1	1.061	1.165	1.10867	0.587135	1.03047	1.26746	0.961689	0.845263	0.632172	0.830442	0.769292	0.826347	1.18563	1.02994	1.01397	0.588235	0.490196	0.627451	0.568627	0.929784	1.08056	1.03294	1.01443	0.88023	0.895914	0.817007	0.864384	0.740259	0.337542	0.563151	0.546984	0.378638	0.283769	0.407484	0.35663
Sibutramine		1.133	1.261	1.296	1.23	1.991	1.863	1.644	1.83267	0.995555	1.00891	1.02988	1.01145	1.021	1.009	0.958	0.996	0.581967	0.482716	0.743763	0.602815	0.603062	0.600932	0.770002	0.657999	0.622754	0.57485	0.91018	0.702595	1.45098	1.35294	1.52941	1.44444	0.935657	1.22214	1.15447	1.10409	0.951051	0.94811	1.00545	0.968204	1.21663	0.722751	0.617114	0.852166	0.752586	0.507848	0.544255	0.601563
Ornidazole		1.18	1.41	1.273	1.28767	1.315	0.942	0.841	1.03267	1.01928	1.06835	1.06183	1.04982	0.995	0.905	1.076	0.992	1.11707	0.638275	1.16536	0.973569	0.851742	1.01673	0.791036	0.886502	1.24551	0.850299	1.4012	1.16567	1.35294	1.15686	0.803922	1.10458	0.981361	1.00345	0.961062	0.981957	1.02101	1.00864	1.09943	1.04303	1.20462	1.18211	1.13132	1.17268	0.782445	0.393453	1.78056	0.985485
Nizatidine		1.177	1.236	1.286	1.233	0.837	0.934	0.892	0.887667	1.04954	1.03854	1.03983	1.04263	0.967	0.89	0.862	0.906333	1.16358	0.984854	1.01515	1.05453	1.02702	1.3026	1.61864	1.31609	1.29341	1.1497	1.23353	1.22555	1.03922	1.47059	1.7451	1.4183	1.11056	1.05579	1.02196	1.06277	0.98156	1.06451	1.04295	1.02967	0.853444	0.757185	0.583992	0.73154	0.621531	0.748837	1.3386	0.902991
Pazufloxacin		1.351	1.614	1.062	1.34233	1.216	1.017	1.057	1.09667	1.04464	1.05971	0.985147	1.02983	0.942	0.921	0.976	0.946333	0.994654	0.918746	1.34872	1.08737	0.814111	1.3089	1.428	1.18367	1.26946	1.4012	1.35329	1.34132	1.19608	1.60784	1.82353	1.54248	0.893783	1.02924	1.14528	1.02277	1.08252	0.9127	1.15469	1.04997	0.259213	1.21301	0.762064	0.744762	0.743595	0.788928	0.71854	0.750354
Voriconazole		1.015	1.374	1.659	1.34933	1.549	1.179	0.9	1.20933	0.984547	1.03807	1.06218	1.02826	0.989	0.983	0.937	0.969667	1.11208	0.950463	0.78742	0.949988	0.974484	1.25219	1.26275	1.16314	1.06587	1.23353	1.23353	1.17764	1.82353	1.78431	1.37255	1.66013	1.02987	1.16367	1.00115	1.0649	1.04552	0.877167	1.06145	0.994711	3.10922	0.735126	0.837769	1.5607	0.641989	0.648291	0.890302	0.726861
Methyltestosterone		1.175	1.285	1.1	1.18667	0.951	0.867	0.982	0.933333	1.07941	1.04226	1.02965	1.05044	0.967	0.934	1.06	0.987	1.04633	0.966857	1.26782	1.09367	1.28005	1.49794	1.00812	1.26204	1.16168	1.17365	1.31737	1.21756	1.47059	1.56863	1.19608	1.41176	1.07634	1.01736	1.12958	1.07443	0.974943	0.960853	1.03559	0.990463	0.613721	0.540433	3.30647	1.48688	0.553996	0.749888	0.993065	0.76565
Benazepril hydrochloride		1.438	1.26	1.492	1.39667	0.887	1.039	1.216	1.04733	1.08765	1.04333	1.06858	1.06652	0.991	0.995	1.015	1.00033	0.934604	1.14701	0.83268	0.97143	0.805148	0.984424	0.960905	0.916826	1.26946	1.36527	1.17365	1.26946	0.862745	1.23529	1.41176	1.16993	1.03204	0.861994	0.985063	0.9597	0.889175	1.03608	0.931201	0.952153	0.810473	0.542219	0.233757	0.528816	0.624661	0.698675	0.659888	0.661075
Honokiol		0.255	0.585	0.052	0.297333	0.115	0.177	0.086	0.126	0.998564	1.04891	1.01056	1.01935	1.158	1.061	1.136	1.11833	0.297755	0.0867783	0.24412	0.209551	0	0.0915021	0	0.0305007	0.0718563	0.0479042	0.011976	0.0439122	0	0.0196078	0	0.00653595	0.852164	0.986978	0.4527	0.763947	0	0.407156	0	0.135719	0.00217583	0.00306601	0.00123471	0.00215885	0.000594662	0.000551721	0.00047311	0.000539831
Topotecan hydrochloride		0.463	0.571	0.73	0.588	0.38	0.455	0.364	0.399667	0.888449	0.958889	1.0246	0.957313	0.664	0.842	0.857	0.787667	1.37063	1.3758	1.64986	1.46543	1.15207	0.962325	0.98114	1.03185	0.598802	0.742515	1.13772	0.826347	0.529412	0.529412	0.431373	0.496732	1.01009	1.2418	0.951487	1.06779	0.971513	0.854255	0.929976	0.918581	1.21055	1.23569	0.320916	0.922383	0.384185	0.242666	0.133896	0.253582
Beclomethasone		1.15	1.303	1.447	1.3	2.136	1.946	1.838	1.97333	1.0735	1.0828	1.10392	1.08674	1.044	1.022	1.051	1.039	1.09159	1.08019	1.13061	1.1008	1.39809	1.16778	1.01558	1.19382	1.18563	1.32934	1.54491	1.35329	3.60784	2.7451	2.2549	2.86928	1.14043	1.13903	1.10379	1.12775	1.04135	1.18483	1.06476	1.09698	9.29348	8.46954	3.28946	7.01749	4.71203	2.796	5.29148	4.2665
Palonosetron hydrochloride		1.528	1.327	1.447	1.434	2.004	1.626	1.905	1.845	1.07004	1.09149	1.06597	1.07584	1.001	0.98	0.949	0.976667	0.978795	1.07003	0.832324	0.960383	0.769292	0.95842	0.919902	0.882538	1.41317	1.34132	1.13772	1.29741	1.86275	1.88235	2.11765	1.95425	0.973446	0.983914	0.905017	0.954126	0.894566	0.964651	1.05581	0.971676	0.502692	0.97611	0.299872	0.592891	1.23068	0.762187	0.817959	0.936942
Nialamide		1.428	1.45	1.129	1.33567	1.348	1.333	1.216	1.299	1.08605	1.04747	1.00959	1.04771	0.946	0.983	0.993	0.974	1.05649	1.03172	1.40342	1.16388	1.16805	1.04699	1.14773	1.12092	1.42515	1.41317	1.49701	1.44511	1.90196	1.68627	1.68627	1.75817	1.04111	1.14771	1.01494	1.06792	1.04344	1.04564	1.1047	1.06459	0.98498	0.635271	2.09998	1.24008	1.08864	0.75721	0.991845	0.945897
Vecuronium bromide		1.044	0.707	0.986	0.912333	1.545	1.317	1.249	1.37033	1.06389	0.970611	1.03873	1.02441	1.099	0.943	0.99	1.01067	1.03243	1.63133	1.50428	1.38934	0.987264	0.949101	1.06554	1.00064	1.01796	1.08982	1.4012	1.16966	1.84314	1.5098	1.60784	1.65359	0.861611	0.945487	0.979957	0.929018	0.866752	1.03719	0.976414	0.960118	1.07307	2.87478	1.28636	1.74474	0.894489	0.726936	1.08032	0.900582
Nobiletin		1.311	1.283	1.284	1.29267	2.584	2.575	2.606	2.58833	1.04129	1.04464	1.03007	1.03867	1.05	1.046	1.092	1.06267	0.812545	0.701711	1.03653	0.850261	0.891946	0.718615	0.616552	0.742371	1.00599	0.850299	1.25749	1.03792	2.78431	2.23529	1.94118	2.32026	1.06345	1.00689	1.072	1.04745	1.01832	1.08019	1.13937	1.0793	0.970411	1.34553	0.862358	1.05943	0.914033	0.579127	1.07467	0.855944
Pravastatin sodium	62	1.175	1.017	1.12	1.104	1.026	1.378	0.948	1.11733	0.985614	0.959465	1.02276	0.989279	0.953	1.017	0.947	0.972333	0.811908	0.725563	0.817684	0.785051	1.40396	1.16663	1.14855	1.23971	1	0.773333	0.96	0.911111	1.54955	1.72973	1.17117	1.48348	0.977804	0.8	0.962272	0.913358	0.933454	1.00691	1.21371	1.05136	0.763617	0.717614	0.835127	0.772119	0.65147	0.824882	1.05778	0.84471
Maltol		1.254	1.392	1.269	1.305	1.213	1.395	1.355	1.321	1.03215	1.03953	1.03845	1.03671	0.975	1.065	1.023	1.021	0.841973	0.703495	0.812204	0.785891	1.11848	1.10492	0.952082	1.05849	1.10667	1.02667	1.08	1.07111	1.45946	1.65766	1.38739	1.5015	0.887627	0.948479	1.10032	0.978808	1.07701	1.02375	1.0853	1.06202	1.05971	0.944824	1.15453	1.05302	0.329439	0.354706	0.0655173	0.249888
Salmeterol		0.03	0.1	0.198	0.109333	0.094	0.064	0.058	0.072	1.11561	1.115	1.0723	1.10097	1.134	1.255	1.177	1.18867	0	0.638329	0.769402	0.469244	0	0	0	0	0	0.0666667	0.16	0.0755556	0	0	0	0	0	0.598899	0.512779	0.370559	0	0	0	0	0.00652171	0.0052928	0.0376548	0.0164898	-0.0141791	-0.000673907	0.00132375	-0.00450976
Naproxen sodium		1.562	1.272	1.584	1.47267	0.748	0.971	0.784	0.834333	1.06256	1.10815	1.12888	1.09986	0.917	0.971	0.95	0.946	0.610634	0.679947	0.578347	0.622976	1.09699	0.758567	1.15298	1.00284	1	0.906667	0.96	0.955556	0.882883	0.792793	0.972973	0.882883	0.994842	0.907679	0.83825	0.91359	0.917704	1.21503	0.953291	1.02867	1.32228	1.66468	1.03113	1.33936	0.288979	0.408733	0.415782	0.371165
Mepirizole		1.686	1.434	1.436	1.51867	1.478	1.08	1.039	1.199	1.11453	1.09591	1.1078	1.10608	1.044	1.006	0.961	1.00367	0.48282	0.736523	0.504887	0.574743	0.679887	1.3642	1.11267	1.05225	0.853333	1.10667	0.76	0.906667	1.08108	1.58559	1.24324	1.3033	0.850884	1.03193	1.13405	1.00562	1.15047	1.12991	1.16285	1.14774	0.991734	1.17494	1.45285	1.20651	0.775289	0.232256	0.362761	0.456769
Idarubicin hydrochloride		0.05	0.003	0.005	0.0193333	0.004	0.002	0.007	0.00433333	-2.86115	-3.66059	-3.05049	-3.19075	-0.627	-5.02	-1.255	-2.30067	79.4145	167.851	76.5206	107.929	41.5072	92.2382	50.731	61.4921	4.14667	0.453333	0.413333	1.67111	0.162162	0.18018	0.396396	0.246246	0.811011	0.693248	0.905013	0.803091	0.660655	0.681455	0.654403	0.665504	0.00312275	0.0220374	0.0346972	0.0199525	0.000308072	0.000188615	0.000155517	0.000217402
Irbesartan		1.415	1.451	1.837	1.56767	1.549	2.342	1.652	1.84767	1.09425	1.09593	1.10668	1.09895	0.996	1.077	0.993	1.022	1.3399	1.12233	1.10782	1.19002	1.41659	1.31569	1.32786	1.35338	1.98667	1.70667	2.13333	1.94222	2.36036	3.31532	2.36036	2.67868	1.1235	1.07447	0.995422	1.06446	0.983108	1.11716	0.882837	0.994369	19.7213	15.7999	12.8334	16.1182	1.19475	1.30338	0.894965	1.13103
SDM25N hydrochloride		0.225	0.179	0.227	0.210333	0.069	0.082	0.022	0.0576667	1.15499	1.09701	1.13238	1.12812	0.925	0.92	0	0.615	0.169579	0.712085	0.336641	0.406102	0	0.614952	0.768621	0.461191	0.04	0.133333	0.08	0.0844444	0	0.0540541	0.018018	0.024024	1.51956	0.914402	0.428629	0.954197	0	0.451818	0.903276	0.451698	0.00462183	0.00325286	0.00421993	0.00403154	0.00142724	0.000308257	0.000174811	0.000636769
Levocetirizine		1.626	1.465	1.55	1.547	1.062	0.89	1.044	0.998667	1.08355	1.11863	1.10724	1.10314	0.987	0.876	0.928	0.930333	0.555539	0.798726	0.558205	0.63749	0.97754	1.43061	1.25121	1.21979	0.946667	1.22667	0.906667	1.02667	1.11712	1.36937	1.40541	1.2973	1.00968	0.899334	0.854593	0.921202	1.16189	0.921431	0.966997	1.01677	1.62548	0.760473	0.956386	1.11411	1.16381	0.814522	0.395449	0.791259
Valdecoxib		1.434	1.351	1.063	1.28267	1.07	1.064	1.645	1.25967	1.13173	1.11237	1.01009	1.08473	0.935	0.917	0.986	0.946	0.825237	0.932168	0.766291	0.841232	0.877	0.991652	1.29299	1.05388	1.24	1.32	0.853333	1.13778	1.00901	1.13514	2.28829	1.47748	1.17125	0.972124	0.889713	1.01103	0.954373	0.971446	0.928043	0.951287	0.929111	1.52239	1.23899	1.23016	0.262611	0.232861	0.175764	0.223745
Etomoxir		1.131	1.495	1.539	1.38833	2.206	2.324	2.304	2.278	0.994131	1.06031	1.05542	1.03662	1.004	1.029	1.061	1.03133	0.967121	0.748963	0.611523	0.775869	0.569386	0.605359	0.588756	0.587834	1.14667	1.17333	0.986667	1.10222	1.35135	1.51351	1.45946	1.44144	1.02057	1.15085	0.978035	1.04982	1.01581	0.970003	0.83679	0.940868	1.02541	0.620698	0.37947	0.675193	0.13084	0.288407	0.0623103	0.160519
Etomidate		1.518	1.57	1.717	1.60167	2.036	1.878	2.29	2.068	1.06068	1.05265	1.06088	1.05807	1.051	1.054	1.098	1.06767	0.846564	0.753555	0.666765	0.755628	0.789928	0.927731	0.607112	0.774924	1.34667	1.24	1.2	1.26222	1.72973	1.87387	1.4955	1.6997	0.907795	1.03518	0.891799	0.944924	0.997054	0.971085	1.18076	1.04963	1.41269	0.325519	0.884679	0.874296	0.218654	0.211509	0.272201	0.234122
Chlorthalidone		1.501	1.403	1.355	1.41967	0.801	0.964	1.157	0.974	1.07911	1.08047	1.12038	1.09332	1.036	0.879	0.934	0.949667	0.779917	0.671209	1.07065	0.84059	1.29678	1.51123	1.66518	1.49106	1.22667	0.986667	1.52	1.24444	1.11712	1.56757	2.07207	1.58559	0.861316	0.910113	1.02463	0.93202	1.04971	0.975053	1.09011	1.03829	0.766746	1.22679	2.32497	1.4395	0.624457	0.907055	0.929703	0.820405
Lincomycin hydrochloride		1.245	1.019	0.953	1.07233	0.981	0.904	0.859	0.914667	1.10912	1.05558	0.968238	1.04431	0.783	0.867	0.788	0.812667	0.817091	0.961493	0.881368	0.886651	1.63981	1.51879	1.24807	1.46889	1.06667	1.02667	0.88	0.991111	1.72973	1.47748	1.15315	1.45345	0.846943	0.848682	0.879629	0.858418	1.02916	0.91602	0.978179	0.974451	1.00399	1.08151	2.04983	1.37844	0.505247	0.457662	0.186011	0.382973
Propantheline bromide		1.065	1.288	1.653	1.33533	1.215	1.638	1.335	1.396	0.936794	1.02415	1.11301	1.02465	1	1.041	0.997	1.01267	1.0511	0.780065	0.507998	0.77972	1.13056	0.961214	0.878476	0.990084	1.17333	1.05333	0.88	1.03556	1.47748	1.69369	1.26126	1.47748	0.991713	0.911388	0.801159	0.90142	1.01497	1.03998	0.869252	0.974732	0.388253	0.445343	0.188452	0.340683	0.288418	0.322019	0.0381936	0.21621
Tetrahydrozoline hydrochloride		1.381	1.577	1.653	1.537	1.52	1.135	1.453	1.36933	1.02062	1.08395	1.06418	1.05625	0.997	0.978	1.042	1.00567	0.838122	0.919579	0.815906	0.857869	1.44362	1.41678	0.795554	1.21865	1.21333	1.52	1.41333	1.38222	2.36036	1.72973	1.24324	1.77778	0.96911	0.939786	1.0426	0.983831	0.962308	0.921551	0.989841	0.9579	0.415629	1.15992	0.974115	0.849888	0.303575	0.21614	0.300316	0.273344
Symmetrel		1.507	1.308	1.442	1.419	1.1	0.962	1.712	1.258	1.07549	1.03273	1.08793	1.06538	0.957	0.964	1.013	0.978	0.624852	0.933501	0.802725	0.787026	1.23286	1.34004	1.10529	1.22606	0.986667	1.28	1.21333	1.16	1.45946	1.38739	2.03604	1.62763	1.06844	0.897943	0.980933	0.98244	0.967238	0.958942	0.909167	0.945116	0.790634	1.05942	0.23267	0.694241	0.368011	0.656512	0.363819	0.46278
Quinapril hydrochloride		1.598	1.17	1.37	1.37933	1.169	0.973	1.235	1.12567	1.10146	1.07775	1.0672	1.08214	0.963	0.92	0.956	0.946333	0.724526	1.02222	0.603525	0.783422	0.859383	1.32509	1.24789	1.14412	1.21333	1.25333	0.866667	1.11111	1.08108	1.38739	1.65766	1.37538	1.00226	0.855636	0.985106	0.947667	0.94235	0.976616	1.07148	0.996814	1.0568	1.47595	1.96907	1.50061	0.405538	0.35887	0.190574	0.318327
Miconazole nitrate		0.073	0.349	0.289	0.237	0.169	0.173	0.098	0.146667	0.904385	1.05189	1.03192	0.996067	1.066	1.163	1.185	1.138	3.31057	2.15225	0.966825	2.14322	0.29756	0	0	0.0991868	0.253333	0.786667	0.293333	0.444444	0.0540541	0	0	0.018018	0.547088	0.444393	0.495045	0.495509	0.447009	0	0	0.149003	0.00277553	0.0583204	0.00304773	0.0213812	0.000414088	0.000103384	0.00132768	0.000615049
Sulfasalazine		1.53	1.572	1.607	1.56967	1.435	0.979	1.195	1.203	1.06673	1.07951	1.05846	1.06823	0.991	1.013	1.017	1.007	0.640255	0.793098	0.538211	0.657188	1.08583	0.992575	0.925149	1.00118	1.02667	1.30667	0.906667	1.08	1.67568	1.04505	1.18919	1.3033	0.857375	0.895393	0.830716	0.861161	1.08518	0.909288	0.973009	0.989159	2.3694	1.12951	0.937495	1.4788	0.203911	0.232515	0.275509	0.237312
Stavudine		1.672	1.553	1.356	1.527	0.592	0.821	0.908	0.773667	1.11115	1.08185	1.04787	1.08029	0.943	0.947	0.959	0.949667	0.699793	0.950237	0.984893	0.878308	1.21662	1.02034	1.32823	1.1884	1.22667	1.54667	1.4	1.39111	0.774775	0.900901	1.2973	0.990991	0.971313	0.942799	0.970385	0.961499	1.09312	1.07677	1.13099	1.10029	0.921812	0.464313	0.843807	0.743311	1.17809	0.788874	0.6357	0.867554
Ipriflavone		1.189	1.235	1.179	1.201	1.513	1.188	1.407	1.36933	1.02623	1.03691	0.99446	1.0192	0.99	0.929	1.019	0.979333	1.86197	1.56546	1.77977	1.73573	1.61666	1.83351	1.85666	1.76894	2.32	2.02667	2.2	2.18222	2.63063	2.34234	2.81081	2.59459	1.03831	1.10611	1.13555	1.09333	1.12822	1.05969	1.11488	1.10093	3.22178	2.64048	3.26651	3.04293	1.05979	0.925697	0.90432	0.963268
Allopurinol		1.004	1.293	1.564	1.287	1.153	1.723	1.224	1.36667	0.996827	1.06696	1.10226	1.05535	0.852	0.943	0.897	0.897333	1.53303	1.14159	0.878406	1.18434	1.84476	1.39962	1.57377	1.60605	1.61333	1.54667	1.44	1.53333	2.28829	2.59459	2.07207	2.31832	0.943147	1.0368	0.93909	0.973013	1.03445	0.996213	1.12979	1.05348	5.17541	1.10108	1.38812	2.55487	0.584082	1.01326	0.333043	0.64346
Acetazolamide		1.44	1.531	1.464	1.47833	1.195	1.162	1.104	1.15367	1.10007	1.12912	1.12067	1.11662	0.98	0.933	1.061	0.991333	0.927873	0.731339	0.89529	0.851501	1.27565	1.54213	0.849606	1.22246	1.4	1.17333	1.37333	1.31556	1.63964	1.92793	1.00901	1.52553	0.970038	1.00921	0.918227	0.965826	0.976495	1.11392	0.969763	1.02006	0.364319	1.007	0.496505	0.622607	0.350542	0.40685	0.38441	0.380601
Perphenazine		0.105	0.168	0.098	0.123667	0.156	0.309	0.449	0.304667	1.00016	1.04588	1.07034	1.03879	1.138	1.137	1.138	1.13767	1.33531	0.831161	0.38981	0.852093	0.107273	0	0	0.0357577	0.146667	0.146667	0.04	0.111111	0.018018	0	0	0.00600601	0.484034	0.688264	0.617908	0.596735	0.66342	0	0	0.22114	0.00666305	0.00411443	0.00099803	0.00392517	0.00056159	0.00058795	0.000842384	0.000663975
Sulfamethoxazole		1.323	1.17	1.273	1.25533	1.467	1.378	1.834	1.55967	1.09897	1.07237	1.05964	1.07699	1.016	1.01	1.046	1.024	1.0194	1.01126	1.1093	1.04665	1.06166	1.20306	0.885855	1.05019	1.41333	1.24	1.48	1.37778	1.67568	1.78378	1.74775	1.73574	0.901072	0.92889	1.01119	0.947049	0.907725	0.923475	1.01701	0.949404	0.128831	0.621966	1.21788	0.656225	0.516939	0.423771	0.227449	0.389386
Mercaptopurine		1.117	0.878	1.25	1.08167	1.489	1.738	1.429	1.552	1.02403	1.03634	1.04157	1.03398	1.028	1.029	0.954	1.00367	0.95705	1.18824	0.753258	0.966183	1.24863	0.905963	1.20721	1.1206	1.12	1.09333	0.986667	1.06667	2	1.69369	1.85586	1.84985	0.967604	0.930629	1.05245	0.98356	0.998377	1.03084	1.05068	1.02663	0.268227	0.663887	1.14522	0.692444	0.493302	0.408888	0.268412	0.390201
Propylthiouracil		0.952	0.884	1.003	0.946333	1.113	1.126	1.267	1.16867	1.04069	1.06604	1.04992	1.05222	0.899	0.994	1.021	0.971333	0.842121	1.06502	1.00178	0.969639	1.14357	1.21994	1.01757	1.12703	0.84	0.986667	1.05333	0.96	1.36937	1.47748	1.38739	1.41141	0.778557	0.93909	1.01907	0.912238	1.01124	0.983348	0.987196	0.993928	1.89764	0.314365	0.154825	0.788945	0.273595	0.342357	0.395692	0.337215
(+/-)-Norepinephrine hydrochloride	63	0.992	1.35	1.317	1.21967	1.275	1.21	1.694	1.393	1.00304	1.06753	1.00327	1.02461	1.007	0.954	1.037	0.999333	1.19213	0.859517	1.45034	1.16733	1.14986	1.26814	1.28873	1.23558	1.13043	1.1087	1.82609	1.35507	1.49565	1.56522	2.22609	1.76232	1.0887	1.04122	1.08049	1.07014	0.998605	1.05311	1.02545	1.02572	0.589446	1.06651	0.986969	0.880976	0.419145	0.547317	0.569122	0.511861
Norfloxacin		1.7	1.462	1.22	1.46067	1.896	2.359	1.544	1.933	1.03217	1.08466	1.06209	1.05964	0.996	1.045	1.058	1.033	0.815987	1.11991	1.00712	0.981005	1.60099	1.16399	1.47943	1.41481	1.32609	1.56522	1.17391	1.35507	3.09565	2.8	2.33043	2.74203	1.17289	1.09663	1.1398	1.13644	1.01825	0.984544	0.941778	0.981522	2.07492	1.67319	0.81829	1.52213	0.864723	1.25866	1.81698	1.31345
Ondansetron		1.538	1.483	1.378	1.46633	1.327	1.126	1.111	1.188	1.05186	1.0658	1.00511	1.04092	1.022	0.929	0.93	0.960333	0.857736	0.782153	0.858132	0.832674	0.963939	1.36275	1.38165	1.23611	1.26087	1.1087	1.13043	1.16667	1.30435	1.56522	1.56522	1.47826	0.883464	0.957703	1.16172	1.00096	1.02196	1.03312	0.867868	0.974317	0.63125	1.32599	0.849566	0.935604	0.585567	1.0345	0.403813	0.674626
Kitasamycin		1.581	1.691	1.429	1.567	1.212	1.394	1.579	1.395	1.07083	1.07707	1.0412	1.06303	0.932	0.92	1.003	0.951667	0.331025	0.887812	0.382074	0.533637	0.830142	0.770853	0.658841	0.753279	0.5	1.43478	0.521739	0.818841	1.02609	1.09565	1.06087	1.06087	0.804653	0.892744	0.924618	0.874005	0.828239	0.893202	0.712144	0.811195	1.00125	1.40167	0.552418	0.985114	0.502351	0.655285	0.181242	0.446292
Duvadilan		1.017	1.297	1.49	1.268	1.183	1.184	1.334	1.23367	0.976743	1.04062	1.07015	1.02917	1.034	1.003	1.013	1.01667	1.05085	1.05243	1.00772	1.037	0.749664	1.06531	0.984531	0.933168	1.02174	1.30435	1.43478	1.25362	0.904348	1.28696	1.33913	1.17681	1.25802	1.31504	1.1277	1.23359	0.856944	0.843231	0.706101	0.802092	1.16239	1.32097	0.579818	1.02106	0.289556	0.447288	0.536245	0.424363
Econazole nitrate		0.269	0.052	0.289	0.203333	0.153	0.118	0.096	0.122333	1.09073	1.07015	1.02645	1.06245	1.042	1.026	1.089	1.05233	2.5368	2.19846	1.97072	2.23533	0.335339	0	0	0.11178	0.652174	0.108696	0.543478	0.434783	0.0521739	0	0	0.0173913	0.525721	0.816488	0.540246	0.627485	1.10169	0	0	0.367228	0.00671072	0.0100152	0.00842741	0.00838444	0.000584517	0.00096227	0.00271679	0.00142119
Ru 24969 hemisuccinate		1.824	1.634	1.798	1.752	3.067	2.809	2.477	2.78433	1.05903	1.04634	1.05536	1.05358	1.091	1.019	1.001	1.037	26.7932	27.5004	27.1112	27.1349	14.0292	11.3741	11.9717	12.4584	46.7174	42.9348	46.587	45.413	43.8783	32.5913	30.2435	35.571	1.96893	1.95858	1.99973	1.97575	1.43835	1.40953	1.47379	1.44056	1.15955	1.53084	0.763721	1.15137	0.509244	0.682271	0.695055	0.628856
Nateglinide		1.237	1.393	1.062	1.23067	1.092	0.852	0.881	0.941667	1.01707	1.06584	0.996752	1.02656	0.962	0.989	0.885	0.945333	1.21369	0.93055	0.728136	0.957459	1.1244	1.24098	1.27729	1.21423	1.43478	1.23913	0.73913	1.13768	1.25217	1.07826	1.14783	1.15942	1.13442	0.918163	1.01594	1.02284	0.94968	0.852179	0.938175	0.913345	1.20955	1.59879	1.30806	1.37213	0.605834	0.454053	0.593767	0.551218
Isoniazid		1.144	1.358	1.411	1.30433	1.412	1.527	1.373	1.43733	0.998233	1.03062	1.06166	1.03017	0.979	1.02	0.998	0.999	1.01425	1.15611	0.886822	1.01906	1.46073	1.01597	1.25431	1.24367	1.1087	1.5	1.19565	1.26812	2.10435	1.58261	1.75652	1.81449	1.22534	1.3371	1.02952	1.19732	0.862406	0.95398	1.01383	0.943405	1.66173	1.4135	1.05403	1.37642	0.779092	0.571753	0.659847	0.670231
Zileuton		1.37	1.368	1.421	1.38633	1.392	1.262	1.082	1.24533	1.1009	1.04913	1.05489	1.06831	0.975	0.971	0.996	0.980667	0.830036	0.931144	1.10467	0.955283	1.26188	1.14887	1.16658	1.19244	1.08696	1.21739	1.5	1.26812	1.7913	1.47826	1.28696	1.51884	1.08708	1.31935	1.07242	1.15962	0.941662	0.914236	0.96839	0.941429	1.55228	1.44317	0.902753	1.2994	0.738845	0.554083	1.10767	0.8002
Pyrimethamine		1.589	1.794	1.408	1.597	1.743	1.054	1.73	1.509	1.04972	1.07436	1.03587	1.05332	1.002	0.831	0.947	0.926667	1.05956	0.811239	1.01761	0.962802	0.929222	1.09993	1.06481	1.03132	1.6087	1.3913	1.36957	1.45652	1.65217	1.18261	1.87826	1.57101	0.995764	1.14169	1.06234	1.06659	1.01941	0.972225	0.992679	0.99477	1.05231	1.04973	0.921709	1.00792	0.678985	0.541423	0.718296	0.646235
Flucytosine		1.462	1.608	1.379	1.483	1.058	1.203	1.616	1.29233	1.05154	1.0714	1.02032	1.04775	0.991	0.977	1.018	0.995333	0.871191	0.792046	0.659478	0.774238	1.24148	1.17613	0.812236	1.07661	1.21739	1.21739	0.869565	1.10145	1.33913	1.44348	1.33913	1.37391	1.1632	1.09502	1.08197	1.1134	0.926554	0.907844	0.993725	0.942708	0.794186	1.06699	2.09516	1.31878	0.789595	0.630852	0.926203	0.782217
Podofilox		0.693	0.907	0.699	0.766333	1.39	1.303	1.059	1.25067	1.0442	1.06202	1.03759	1.04793	1.035	1.056	1.003	1.03133	0.886031	0.852592	1.1391	0.95924	0.662323	0.811539	0.853121	0.775661	0.586957	0.73913	0.76087	0.695652	0.93913	1.07826	0.921739	0.97971	0.960393	1.04472	0.899065	0.968059	0.874608	0.813597	0.922603	0.870269	3.43227	1.38813	0.756211	1.85887	0.612656	0.501478	0.73816	0.617431
Amitriptyline hydrochloride		0.989	1.019	0.997	1.00167	1.092	0.782	0.842	0.905333	1.02893	1.0762	1.04978	1.05164	0.827	0.878	0.902	0.869	0.368025	0.267907	0.776019	0.47065	0.702711	0.414524	0.911714	0.676316	0.347826	0.26087	0.73913	0.449275	0.782609	0.330435	0.782609	0.631884	0.744402	0.659942	0.763903	0.722749	0.849041	0.866357	0.762464	0.825954	0.146217	0.230838	0.0128827	0.129979	0.531412	0.393102	0.737701	0.554072
Dicloxacillin sodium		1.602	1.659	1.162	1.47433	2.071	1.126	1.498	1.565	1.0666	1.09128	1.05865	1.07218	0.876	0.693	0.745	0.771333	0.496834	0.452513	0.58706	0.512136	0.741109	0.89331	1.0471	0.893841	0.76087	0.717391	0.652174	0.710145	1.56522	1.02609	1.6	1.3971	0.911842	0.912918	1.20557	1.01011	0.904242	0.909471	0.861243	0.891652	1.15331	1.26379	0.458564	0.958556	0.876181	0.612437	1.24986	0.912825
Thioridazine hydrochloride		0.129	0.046	0.034	0.0696667	0.23	0.327	0.158	0.238333	0.935195	0.78255	1.12366	0.947134	1.074	1.118	0.981	1.05767	2.11991	3.95726	1.31915	2.46544	0.14852	0.104153	0	0.0842245	0.26087	0.173913	0.0434783	0.15942	0.0347826	0.0347826	0	0.0231884	0.648242	0.579921	0.516441	0.581535	0.42731	0.487972	0	0.305094	0.0105384	0.0091297	0.0157312	0.0117998	0.000278633	0.000566628	0.000153367	0.000332876
Albendazole		0.491	0.537	0.586	0.538	1.037	1.147	1.327	1.17033	1.04321	1.03894	1.067	1.04972	1.039	1.071	1.085	1.065	1.52909	2.4998	1.74594	1.92494	0.887938	0.99627	0.719721	0.867976	0.717391	1.28261	0.978261	0.992754	0.93913	1.16522	0.973913	1.02609	0.913456	0.919239	1.00733	0.946675	1.12853	0.982917	1.08542	1.06562	5.18875	0.383601	0.413694	1.99535	0.821755	1.03976	1.23515	1.03222
Mepivacaine hydrochloride		1.239	1.278	1.447	1.32133	2.115	1.479	1.208	1.60067	1.0364	1.04693	1.10926	1.0642	1.081	1.014	0.983	1.026	1.10131	0.747329	1.02157	0.956734	0.838398	1.95961	0.846655	1.21489	1.30435	0.913043	1.41304	1.21014	1.8087	2.95652	1.04348	1.93623	0.895434	1.2673	1.02616	1.06296	0.871005	1.03998	1.07809	0.996359	1.36541	0.532207	0.0938674	0.66383	0.651438	0.831885	1.11474	0.86602
Hydroflumethiazide		1.909	1.677	1.916	1.834	1.191	1.663	1.975	1.60967	1.13145	1.0818	1.08765	1.1003	0.96	0.912	1.007	0.959667	1.4533	1.66799	1.06826	1.39652	1.90371	2.28699	1.51117	1.90062	2.65217	2.67391	1.95652	2.42754	2.31304	3.87826	3.04348	3.07826	1.04324	1.15863	1.09986	1.10058	0.962696	1.09123	1.03637	1.0301	8.4448	7.17828	2.80302	6.14203	2.30815	3.01756	2.54806	2.62459
Phentolamine mono-hydrochloride		1.275	1.502	1.352	1.37633	1.496	1.327	1.337	1.38667	1.0096	1.04273	1.03705	1.02979	0.966	0.864	0.843	0.891	1.01702	0.878116	0.807677	0.900937	1.26486	1.09246	1.36464	1.24065	1.23913	1.26087	1.04348	1.18116	1.93043	1.47826	1.86087	1.75652	1.19736	1.25896	1.16374	1.20669	0.849274	0.902499	0.8595	0.870424	0.309159	0.374169	0.188799	0.290709	0.624622	0.552545	0.562682	0.57995
Procaine hydrochloride		0.943	1.274	1.183	1.13333	1.238	1.246	1.02	1.168	0.977826	1.06701	1.02843	1.02442	0.892	0.968	0.943	0.934333	1.23071	1.21429	1.34606	1.26369	1.33648	1.39567	1.48799	1.40671	1.1087	1.47826	1.52174	1.36957	1.68696	1.77391	1.54783	1.66957	1.00679	1.08708	1.05992	1.05126	1.04916	1.04346	0.939338	1.01065	2.21072	0.342403	0.483148	1.01209	0.541819	0.725881	0.780886	0.682862
19-Norethindrone		1.138	1.075	1.221	1.14467	0.878	1.491	0.665	1.01133	1.04097	1.01979	1.0815	1.04742	0.96	1.028	0.965	0.984333	1.33914	0.994658	1.24832	1.19404	1.53494	1.7151	1.56399	1.60468	1.45652	1.02174	1.45652	1.31159	1.37391	2.6087	1.06087	1.68116	1.13684	1.01042	0.945733	1.031	0.845439	0.914585	0.763974	0.841333	0.150421	0.405992	0.0644595	0.206957	0.675868	0.601426	0.803528	0.693607
Simvastatin		1.167	1.274	1.182	1.20767	1.047	1.563	1.508	1.37267	1.05803	1.04094	1.00131	1.03343	0.863	0.899	1.019	0.927	2.35873	1.42857	1.80926	1.86552	1.72584	1.66884	1.89913	1.7646	2.63043	1.73913	2.04348	2.13768	1.84348	2.66087	2.92174	2.47536	1.11519	1.05333	1.03288	1.06713	1.11354	0.993376	0.936432	1.01445	0.511156	1.74117	3.48149	1.91127	1.17663	0.987248	1.15371	1.10586
Terazosin		1.274	1.532	1.317	1.37433	0.95	1.397	1.399	1.24867	1.06485	1.0531	1.02849	1.04881	0.894	0.985	1.006	0.961667	0.821528	0.771864	0.656114	0.749835	1.5801	1.46471	1.47506	1.50662	1	1.13043	0.826087	0.985507	1.53043	2.08696	2.10435	1.90725	1.11963	1.09475	0.906328	1.04023	0.97792	0.97269	0.850901	0.933837	0.456084	1.64486	0.938008	1.01298	0.748746	1.59976	1.17086	1.17312
					#DIV/0!	#N/A	#N/A	#N/A	#N/A				#DIV/0!	#N/A	#N/A	#N/A	#N/A				#DIV/0!	#N/A	#N/A	#N/A	#N/A				#DIV/0!	#N/A	#N/A	#N/A	#N/A				#DIV/0!	#N/A	#N/A	#N/A	#N/A				#DIV/0!	#N/A	#N/A	#N/A	#N/A
					#DIV/0!	#N/A	#N/A	#N/A	#N/A				#DIV/0!	#N/A	#N/A	#N/A	#N/A				#DIV/0!	#N/A	#N/A	#N/A	#N/A				#DIV/0!	#N/A	#N/A	#N/A	#N/A				#DIV/0!	#N/A	#N/A	#N/A	#N/A				#DIV/0!	#N/A	#N/A	#N/A	#N/A
					#DIV/0!	#N/A	#N/A	#N/A	#N/A				#DIV/0!	#N/A	#N/A	#N/A	#N/A				#DIV/0!	#N/A	#N/A	#N/A	#N/A				#DIV/0!	#N/A	#N/A	#N/A	#N/A				#DIV/0!	#N/A	#N/A	#N/A	#N/A				#DIV/0!	#N/A	#N/A	#N/A	#N/A
					#DIV/0!	#N/A	#N/A	#N/A	#N/A				#DIV/0!	#N/A	#N/A	#N/A	#N/A				#DIV/0!	#N/A	#N/A	#N/A	#N/A				#DIV/0!	#N/A	#N/A	#N/A	#N/A				#DIV/0!	#N/A	#N/A	#N/A	#N/A				#DIV/0!	#N/A	#N/A	#N/A	#N/A
Acebutolol hydrochloride	73	0.965	0.725	1.025	0.905	1.161	1.272	1.245	1.226	0.761784	0.749192	0.793711	0.768229	0.999	1.058	0.976	1.011	0.700168	1.15253	0.780874	0.877857	0.940928	0.811543	0.780134	0.844202	0.703704	0.87037	0.833333	0.802469	1.17073	1.10569	1.04065	1.10569	1.03752	0.862132	0.879215	0.926289	0.884136	0.931404	1.18942	1.00165	0.128356	0.146315	0.551719	0.275463	0	0	0	0
Acetylcholine chloride		1.084	1.207	0.998	1.09633	1.551	0.855	1.009	1.13833	0.81013	0.862598	0.886278	0.853002	1.023	1.085	1.053	1.05367	1.08238	0.987158	1.01518	1.02824	0.802057	1.08307	0.646763	0.843963	1.22222	1.24074	1.05556	1.17284	1.33333	0.99187	0.699187	1.00813	1.11737	0.912496	0.982094	1.00399	0.960111	1.0128	0.874337	0.949082	0.233561	0.504566	0.272292	0.336806	0	0	0	0
Clozapine		1.27	1.477	1.743	1.49667	1.344	1.192	1.414	1.31667	1.02726	1.11922	1.31969	1.15539	0.899	0.856	0.985	0.913333	0.560073	0.638242	0.80605	0.668122	0.89206	1.06975	0.536432	0.832749	0.740741	0.981481	1.46296	1.06173	1.28455	1.36585	0.813008	1.15447	0.761152	0.932237	0.90174	0.865043	0.866382	0.924487	0.845515	0.878795	0.30994	0.30802	0.154267	0.257409	0	0	0	0
Imipramine hydrochloride		1.571	1.71	1.279	1.52	1.498	0.75	0.617	0.955	1.17607	1.21028	1.0991	1.16182	0.828	0.845	0.784	0.819	0.316938	0.499264	0.750926	0.522376	0.749601	1.09263	0.541295	0.79451	0.518519	0.888889	1	0.802469	1.20325	0.878049	0.357724	0.813008	0.632964	0.925783	0.922619	0.827122	0.856929	0.785681	0.991353	0.877988	0.177233	0.364218	0.565226	0.368892	0	0	0	0
Fenofibrate		1.557	1.338	1.484	1.45967	1.203	1.485	1.597	1.42833	0.90253	0.938375	0.789402	0.876769	0.762	0.802	0.788	0.784	0.833562	0.544744	0.88696	0.755089	0.327966	0.357701	0.351562	0.345743	1.35185	0.759259	1.37037	1.16049	0.422764	0.569106	0.601626	0.531165	1.03967	1.08371	1.04334	1.05557	1.11656	0.853701	1.16855	1.04627	0.226265	0.544244	0.363526	0.378012	0	0	0	0
Carisoprodol		1.494	1.61	1.252	1.452	1.38	1.73	1.709	1.60633	1.04731	1.17217	0.914361	1.04461	0.973	0.959	0.995	0.975667	0.940155	0.916908	1.24948	1.03551	1.18758	1.1313	0.78125	1.03338	1.46296	1.53704	1.62963	1.54321	1.7561	2.09756	1.43089	1.76152	0.883898	1.04866	0.960709	0.964421	0.943855	0.971294	0.887019	0.934056	0.751436	0.262076	1.13568	0.716398	0	0	0	0
Racepinephrine		1.513	1.426	1.335	1.42467	1.336	1.144	0.988	1.156	1.10061	1.14084	1.18944	1.14363	1.054	1.062	1.116	1.07733	0.78727	0.636008	0.546267	0.656515	0.590482	0.557079	0.399394	0.515652	1.24074	0.944444	0.759259	0.981481	0.845528	0.682927	0.422764	0.650407	1.08877	1.08459	0.915786	1.02972	0.952386	0.840327	1.17178	0.988164	0.831618	0.757789	0.296256	0.628554	0	0	0	0
Methoxsalen		1.787	1.687	1.517	1.66367	1.192	1.251	1.723	1.38867	1.29828	1.11861	1.06161	1.1595	1.001	0.988	1.088	1.02567	0.905741	1.19121	1.33638	1.14444	0.802296	0.752312	0.458068	0.670892	1.68519	2.09259	2.11111	1.96296	1.02439	1.00813	0.845528	0.95935	0.872256	0.990573	0.906169	0.922999	1.08819	1.05349	1.06364	1.06844	0.184214	0.647366	0.645225	0.492268	0	0	0	0
Praziquantel		1.068	1.312	1.384	1.25467	0.99	1.097	1.055	1.04733	0.864697	0.840608	0.900431	0.868578	0.929	0.862	0.829	0.873333	1.28146	1.21984	0.989493	1.1636	0.904496	0.830437	0.906569	0.880501	1.42593	1.66667	1.42593	1.50617	0.95935	0.97561	1.02439	0.98645	0.99323	1.03841	1.09725	1.04296	0.917109	1.06318	1.12186	1.03405	0.600868	0.601965	0.398458	0.533764	0	0	0	0
Warfarin sodium		1.732	1.696	1.564	1.664	1.369	1.485	1.218	1.35733	1.08545	1.09749	1.19591	1.12628	0.956	0.901	0.967	0.941333	1.00594	1.19557	0.784427	0.995313	0.842634	0.99139	0.834582	0.889536	1.81481	2.11111	1.27778	1.73457	1.23577	1.57724	1.08943	1.30081	1.02727	0.995634	1.07687	1.03326	1.08427	0.938091	1.11275	1.04504	0.658229	0.23034	1.00645	0.631674	0	0	0	0
Homoharringtonine		0.352	0.631	0.571	0.518	0.118	0.196	0.135	0.149667	0.406579	0.598455	0.677965	0.560999	0.977	1.023	0.983	0.994333	0.252576	0.16923	0.591645	0.337817	0.257175	0	0	0.0857249	0.0925926	0.111111	0.351852	0.185185	0.0325203	0	0	0.0108401	0.651566	0.818981	0.697248	0.722598	2.47602	0	0	0.82534	0.00155993	0.017984	0.0231994	0.0142478	0	0	0	0
Triclosan		1.678	1.242	1.051	1.32367	0.455	0.352	0.556	0.454333	1.10314	1.03211	0.510754	0.882	0.573	0.52	0.816	0.636333	1.30339	1.05954	0.947465	1.10346	1.33418	1.29273	0.573342	1.06675	2.27778	1.37037	1.03704	1.56173	0.650407	0.487805	0.341463	0.493225	1.14559	1.19418	1.45017	1.26331	0.923565	0.800092	0.930597	0.884751	0.388328	0.209785	0.293074	0.297062	0	0	0	0
Ranitidine hydrochloride		1.032	1.407	1.275	1.238	1.22	0.91	1.253	1.12767	0.83563	1.02925	0.99753	0.954137	1.004	0.873	0.954	0.943667	0.982387	1.06198	1.1574	1.06726	1.34319	1.23414	1.34479	1.30737	1.05556	1.55556	1.53704	1.38272	1.7561	1.20325	1.80488	1.58808	0.848592	0.913508	0.883265	0.881788	0.912728	0.991353	0.965183	0.956421	0.752454	0.611005	0.727169	0.696876	0	0	0	0
Cimetidine		1.706	1.555	1.38	1.547	1.14	1.074	1.374	1.196	1.11361	0.99558	1.16669	1.09196	0.906	0.847	0.963	0.905333	1.00056	1.64621	1.44287	1.36321	1.07805	1.22975	0.850207	1.05267	1.77778	2.66667	2.07407	2.17284	1.31707	1.41463	1.25203	1.32791	1.02778	1.18317	1.0608	1.09058	0.987203	1.19633	1.00934	1.06429	1.71305	1.83173	3.6701	2.40496	0	0	0	0
LY 171883		1.424	1.72	1.519	1.55433	1.582	1.194	1.076	1.284	1.03945	1.17451	1.19535	1.13644	0.925	0.863	0.909	0.899	0.998934	1.20948	1.13578	1.11473	0.911352	1.56386	1.11464	1.19661	1.48148	2.16667	1.7963	1.81481	1.54472	2	1.28455	1.60976	0.88858	1.08067	1.01879	0.996014	1.03378	0.938437	1.12405	1.03209	0.696758	0.755856	0.802276	0.75163	0	0	0	0
Meclofenamic acid sodium salt		1.431	1.28	1.049	1.25333	0.485	0.664	0.906	0.685	1.09572	1.03917	0.90539	1.01343	0.909	0.856	0.91	0.891667	1.23019	1.01376	1.32196	1.18864	0.687739	0.776626	0.837372	0.767246	1.83333	1.35185	1.44444	1.54321	0.357724	0.552846	0.813008	0.574526	1.00525	0.93907	1.00399	0.982769	0.912843	0.81335	0.928753	0.884982	0.106903	0.461987	0.286605	0.285165	0	0	0	0
Metoclopramide hydrochloride		1.408	1.291	1.435	1.378	1.67	1.072	1.154	1.29867	0.94482	0.934939	0.845864	0.908541	1.034	0.898	0.845	0.925667	1.2374	0.785138	1.28907	1.10387	1.04536	1.04783	1.26291	1.1187	1.81481	1.05556	1.92593	1.59877	1.86992	1.20325	1.56098	1.54472	1.04511	0.934261	1.08004	1.0198	1.02848	1.06076	0.953309	1.01418	0.38571	0.881638	0.343789	0.537046	0	0	0	0
Gemfibrozil		1.617	1.713	0.981	1.437	1.603	1.317	1.224	1.38133	1.11879	1.17932	1.02483	1.10765	0.979	0.911	0.895	0.928333	1.15487	1.16258	1.28714	1.20153	1.18351	0.737325	0.607541	0.842793	1.94444	2.07407	1.31481	1.77778	2.03252	1.04065	0.796748	1.28997	1.01866	0.947548	0.904144	0.956786	0.911344	1.21559	1.25271	1.12655	0.585277	0.197655	0.82993	0.537621	0	0	0	0
SR 57227A		1.513	2.07	1.675	1.75267	1.531	1.344	0.739	1.20467	1.09416	1.28689	1.25697	1.21268	0.953	0.91	0.906	0.923	0.81072	0.901782	1.09375	0.935418	0.892379	1.10658	0.780772	0.926578	1.27778	1.94444	1.90741	1.70988	1.46341	1.5935	0.617886	1.22493	0.983613	0.949699	1.01525	0.982854	0.972677	0.96576	1.08485	1.00776	0.0820072	0.547005	0.699555	0.442856	0	0	0	0
Memantine hydrochloride		2.193	1.666	1.96	1.93967	1.34	1.216	1.005	1.187	1.25203	1.11125	1.16517	1.17615	0.963	0.927	1.057	0.982333	1.15141	0.811329	0.798335	0.920359	0.736049	0.810906	0.845504	0.797486	2.62963	1.40741	1.62963	1.88889	1.05691	1.05691	0.910569	1.00813	1.06485	0.997912	0.908067	0.990277	0.971294	1.11852	0.985359	1.02506	0.939924	0.747779	0.646505	0.77807	0	0	0	0
Mefenamic acid		1.156	1.168	1.282	1.202	1.22	1.196	0.931	1.11567	0.875172	0.92725	1.03267	0.945031	1.05	0.975	0.856	0.960333	1.06137	1.15669	1.17882	1.13229	1.19396	0.837851	0.99442	1.00874	1.27778	1.40741	1.57407	1.41975	1.56098	1.07317	0.99187	1.20867	1.10104	1.06321	0.92844	1.0309	1.01038	0.967028	0.99804	0.991815	0.447536	2.3184	0.572567	1.11283	0	0	0	0
Rifampicin		2.452	2.242	2.274	2.32267	1.837	1.521	2.105	1.821	1.16743	1.18257	1.30497	1.21832	0.879	0.901	0.867	0.882333	0.391554	0.467895	0.344145	0.401198	0.487404	0.40904	0.446907	0.447784	1	1.09259	0.814815	0.969136	0.95935	0.666667	1.00813	0.878049	0.973869	0.858463	0.83695	0.889761	0.819576	0.812428	0.730459	0.787488	0.243392	0.0787741	0.37971	0.233958	0	0	0	0
Mepenzolate bromide		1.245	1.54	1.331	1.372	1.479	1.27	0.748	1.16567	1.12587	1.18326	1.21212	1.17375	0.89	0.865	0.931	0.895333	0.985229	1.20116	1.21557	1.13399	1.3133	1.20711	0.892538	1.13765	1.27778	1.92593	1.68519	1.62963	2.0813	1.64228	0.715447	1.47967	1.26061	1.14344	1.10762	1.17056	1.05787	1.01061	1.06721	1.04523	0.435283	1.02479	0.11437	0.524815	0	0	0	0
Thalidomide		1.466	1.379	1.624	1.48967	0.661	0.851	0.811	0.774333	1.22488	1.17525	1.15404	1.18473	0.926	1.049	1.106	1.027	1.22501	1.21253	1.24846	1.22867	0.964923	0.802535	0.767219	0.844893	1.87037	1.74074	2.11111	1.90741	0.682927	0.731707	0.666667	0.693767	0.963366	1.09041	0.985131	1.01297	0.978557	1.03735	0.933595	0.983168	1.48207	0.40083	0.831006	0.904636	0	0	0	0
Dicyclomine hydrochloride		2.619	2.363	2.459	2.48033	1.433	1.652	1.65	1.57833	1.07338	1.04498	1.08475	1.0677	0.944	1.018	0.913	0.958333	0.196944	0.218263	0.188011	0.201073	0.58227	0.67044	0.735571	0.66276	0.537037	0.537037	0.481481	0.518519	0.894309	1.18699	1.30081	1.12737	0.958178	0.961088	0.95261	0.957292	0.970602	0.978441	0.801937	0.916993	0.184654	0.179393	0.0784517	0.1475	0	0	0	0
(+)-cis-Diltiazem hydrochloride		1.827	1.888	1.65	1.78833	1.609	1.641	1.942	1.73067	1.24472	1.26977	1.2244	1.24629	0.891	0.929	1.004	0.941333	1.63515	1.46906	1.39018	1.49813	1.00949	0.813855	0.601802	0.808381	3.11111	2.88889	2.38889	2.7963	1.73984	1.43089	1.25203	1.47425	0.990193	1.00728	0.968301	0.98859	0.929675	0.870187	0.904427	0.90143	14.408	10.3296	7.7632	10.8336	0	0	0	0
Flutamide		1.223	1.137	1.118	1.15933	1.769	1.715	1.03	1.50467	1.06435	1.1533	1.18482	1.13416	1.002	0.991	0.925	0.972667	1.39627	0.969798	0.970611	1.11223	0.84957	0.681282	1.0904	0.873751	1.77778	1.14815	1.12963	1.35185	1.60976	1.25203	1.20325	1.35501	0.885163	1.04878	1.07561	1.00318	0.981669	0.926562	1.02744	0.978557	1.64204	1.3577	2.31647	1.77207	0	0	0	0
Vidarabine		0.916	1.228	1.063	1.069	0.741	0.546	1.085	0.790667	1.06181	1.04389	0.896512	1.00074	0.981	0.876	1.116	0.991	1.12583	0.941272	0.735902	0.934335	0.819754	1.13887	0.475526	0.811384	1.07407	1.2037	0.814815	1.03086	0.650407	0.666667	0.552846	0.623306	0.894907	0.883518	1.06169	0.946705	0.801245	1.01084	1.06387	0.95865	1.232	1.81985	2.58835	1.88006	0	0	0	0
Disopyramide phosphate	74	1.261	1.298	0.882	1.147	1.127	1.37	1.415	1.304	1.08427	1.07901	1.06233	1.0752	0.898	0.942	0.964	0.934667	1.07522	1.34336	1.42668	1.28175	1.22231	1.54682	1.36093	1.37669	1.19658	1.53846	1.11111	1.28205	1.43119	2.20183	2	1.87768	1.15501	1.09932	1.1438	1.13271	1.04933	1.04106	1.18084	1.09041	0.484159	1.35952	2.51189	1.45186	0.691249	2.2141	1.56264	1.48933
Amoxapine		0.095	0.064	0.146	0.101667	0.048	0.147	0.128	0.107667	1.04387	0.233481	0.433524	0.570292	1.085	1.123	1.165	1.12433	0.203919	1.20405	0.399241	0.602402	0	0	0	0	0.017094	0.0683761	0.0512821	0.045584	0	0	0	0	0.981373	0.648534	1.24215	0.957353	0	0	0	0	0.0956622	-0.0113539	-0.125013	-0.0135683	0.00161447	0.00134475	0.00201872	0.00165931
Methyldopa		1.209	1.485	1.316	1.33667	1.039	0.952	0.927	0.972667	1.0415	1.30342	1.22832	1.19108	0.958	0.87	0.916	0.914667	1.24981	1.2134	1.79558	1.4196	0.799483	1.20679	1.22012	1.07546	1.33333	1.58974	2.08547	1.66952	0.862385	1.19266	1.17431	1.07645	1.03345	1.07818	1.02456	1.0454	1.18133	1.05612	1.00278	1.08008	3.46408	0.322989	2.20005	1.99571	1.06862	0.939597	1.79493	1.26771
Fluconazole		0.873	0.873	0.85	0.865333	1.108	1.154	0.81	1.024	1.08039	1.07005	1.12018	1.09021	1.029	1.055	1.019	1.03433	1.26422	0.798483	1.00228	1.02166	0.653896	0.673599	1.02567	0.78439	0.974359	0.615385	0.752137	0.780627	0.752294	0.807339	0.862385	0.807339	0.920013	0.892684	0.888946	0.900548	1.15034	0.89461	1.13293	1.05929	2.13037	0.789872	0.799891	1.24005	0.617106	0.563922	0.601299	0.594109
Mefloquine hydrochloride		0.107	0.15	0.121	0.126	0.048	0.055	0.043	0.0486667	0.616387	0.240149	0.44686	0.434465	0.691	0.559	0.499	0.583	0.180657	0.128951	0.160051	0.156553	0.368594	0	0	0.122865	0.017094	0.017094	0.017094	0.017094	0.0183486	0	0	0.00611621	0.949404	1.74309	1.52266	1.40505	2.01087	0	0	0.670289	0.00434828	0.00706596	0.00570712	0.00570712	0.000118276	0.000190556	0.00011499	0.000141274
Brimonidine		0.768	1.112	0.728	0.869333	1.101	1.282	1.227	1.20333	1.08043	1.18051	1.06525	1.10873	0.885	0.933	0.981	0.933	0.958913	1.37573	1.09128	1.14197	1.30013	1.40581	0.979301	1.22841	0.649573	1.35043	0.700855	0.900285	1.48624	1.87156	1.24771	1.53517	0.77873	1.19987	1.07187	1.01682	1.02118	1.15935	1.05415	1.07822	1.75888	1.06151	22.7062	8.50886	1.22284	1.90106	1.32764	1.48385
Sulindac		1.472	1.616	1.65	1.57933	1.568	1.552	1.507	1.54233	1.23672	1.28455	1.25648	1.25925	0.919	0.933	1.001	0.951	0.539317	0.742984	0.79823	0.69351	0.586028	0.979202	0.480545	0.681925	0.700855	1.05983	1.16239	0.974359	0.954128	1.57798	0.752294	1.0948	0.928392	1.16262	0.912923	1.00131	1.06217	0.984503	0.797308	0.947994	0.31127	1.08186	0.390764	0.594632	0.766844	0.756841	0.202823	0.575503
Theophylline		1.235	1.037	1.281	1.18433	1.255	0.723	0.74	0.906	1.13146	0.941495	1.11432	1.06242	1.038	0.995	1.07	1.03433	1.19204	1.15777	1.48192	1.27724	0.731914	1.24699	0.787541	0.922148	1.29915	1.05983	1.67521	1.34473	0.954128	0.93578	0.605505	0.831804	1.0069	1.09571	0.895134	0.999248	1.04279	0.946348	1.09699	1.02871	0.365942	1.17974	0.583404	0.709697	0.512358	0.707033	0.284076	0.501155
Zolpidem tartrate		1.027	1.348	1.097	1.15733	1.134	0.763	0.973	0.956667	1.06548	1.18565	1.22165	1.15759	0.921	0.793	0.902	0.872	1.41517	1.59469	1.58913	1.533	1.43268	1.59688	2.32441	1.78466	1.28205	1.89744	1.53846	1.57265	1.68807	1.26606	2.34862	1.76758	1.00226	0.978021	1.01424	0.998174	0.996234	1.0392	1.15132	1.06225	1.29383	0.477303	1.1653	0.978812	1.13056	2.00203	1.48859	1.54039
Zolmitriptan		1.584	1.436	1.391	1.47033	1.555	1.101	1.126	1.26067	1.30873	1.31863	1.04324	1.22354	0.903	0.967	0.933	0.934333	1.72389	1.60556	1.44804	1.5925	1.38591	1.17166	1.4283	1.32862	2.41026	2.03419	1.77778	2.07407	2.23853	1.33945	1.66972	1.74924	1.09907	0.969127	1.15282	1.07367	1.01883	1.05538	0.963759	1.01266	1.63386	2.37119	4.76261	2.92255	1.67992	1.28997	1.33947	1.43645
Estradiol valerate		0.167	0.791	0.506	0.488	0.048	0.071	0.06	0.0596667	0.611758	1.30748	1.30748	1.07557	0.049	0.499	0.274	0.274	0.231985	0.0979772	0.0383059	0.122756	0.368594	0	0.292666	0.22042	0.034188	0.0683761	0.017094	0.039886	0.0183486	0	0.0183486	0.0122324	0.532775	0.858653		0.695714	0.441193	0	3.44335	1.29485	0.00537141	0.00181179	0.00184329	0.00300883	0.00128132	0.000260645	0.000189396	0.000577121
Spironolactone		1.455	1.39	1.336	1.39367	0.554	0.517	0.605	0.558667	1.26343	1.24117	1.2235	1.2427	0.849	1.011	1.023	0.961	1.1445	0.85019	0.550948	0.848546	0.60603	0.478754	0.554483	0.546423	1.47009	1.04274	0.649573	1.05413	0.348624	0.256881	0.348624	0.318043	1.01966	0.983178	0.776281	0.926372	0.968698	0.861641	1.21689	1.01574	0.184921	0.638615	0.465407	0.429648	0.247971	0.198115	0.267319	0.237802
Hydrocortisone hemisuccinate		1.281	1.584	1.42	1.42833	1.019	0.952	0.948	0.973	1.15185	1.29355	1.42595	1.29045	1.03	0.996	1.005	1.01033	2.4196	1.78508	2.16839	2.12436	1.50831	1.15106	1.11812	1.25916	2.73504	2.49573	2.71795	2.64957	1.59633	1.13761	1.10092	1.27829	0.985756	0.983693	1.0176	0.995682	1.12947	1.18997	0.97339	1.09761	9.3042	9.17523	13.8744	10.7846	1.81432	1.59799	1.48725	1.63319
Hydrocortisone 17-valerate		1.463	1.128	1.177	1.256	1.069	1.024	1.046	1.04633	1.25476	1.11383	1.29214	1.22024	0.867	0.923	0.909	0.899667	2.63439	2.59368	1.25107	2.15971	1.47119	1.20728	1.1827	1.28706	3.40171	2.5812	1.29915	2.42735	1.63303	1.2844	1.2844	1.40061	0.964099	0.964099	1.04879	0.99233	1.16083	0.94536	1.0418	1.04933	9.01056	7.71515	9.80208	8.8426	0.971136	1.0399	1.7418	1.25095
Nitrazepam		1.183	1.325	1.636	1.38133	1.305	1.509	1.074	1.296	1.03395	1.30142	1.25972	1.19836	0.915	0.967	0.984	0.955333	1.32642	1.25689	1.32579	1.30303	1.3268	1.06538	1.03622	1.1428	1.38462	1.47009	1.91453	1.58974	1.79817	1.66972	1.15596	1.54128	0.928134	1.01489	0.943861	0.962295	1.10897	1.17602	1.19022	1.1584	0.104427	1.00886	0.300315	0.4712	1.61415	1.02688	0.385402	1.00881
Nitrofurantoin		1.589	0.838	1.279	1.23533	0.863	1.55	0.93	1.11433	1.20471	0.957303	1.15793	1.10665	0.954	1.085	1.075	1.038	1.26789	2.08003	1.10531	1.48441	0.962384	0.93472	0.740671	0.879258	1.77778	1.53846	1.24786	1.52137	0.862385	1.50459	0.715596	1.02752	1.00354	0.95108	1.00329	0.985971	0.978823	1.14898	1.0555	1.0611	0.474029	1.32627	0.436017	0.745437	0.248701	0.380338	0.292679	0.30724
Chlorothiazide		1.189	1.377	1.524	1.36333	1.051	1.094	1.11	1.085	1.03367	1.19984	1.20236	1.14529	0.961	0.897	0.869	0.909	1.2708	1.111	1.20708	1.19629	1.10946	1.03393	1.4489	1.19743	1.33333	1.35043	1.62393	1.4359	1.21101	1.17431	1.66972	1.35168	1.03835	1.18286	1.01283	1.07801	1.09576	0.96487	1.11391	1.05818	0.72619	0.439917	1.59361	0.919906	0.200605	1.56737	1.25495	1.00764
Carbinoxamine maleate		1.465	1.452	1.475	1.464	1.853	1.987	1.461	1.767	1.17755	1.10473	1.00198	1.09475	0.89	1.005	0.864	0.919667	1.29595	1.4402	1.12895	1.28837	1.01035	1.0405	1.08827	1.04637	1.67521	1.84615	1.47009	1.66382	1.94495	2.14679	1.65138	1.91437	0.960361	0.952626	1.06851	0.993834	1.09638	1.02352	0.940298	1.02007	0.622155	0.678643	0.256314	0.519037	0.455127	0.371536	0.708975	0.511879
Cortisone acetate		1.267	1.379	1.593	1.413	1.218	0.866	0.957	1.01367	1.08613	1.24209	1.1786	1.16894	0.928	1.018	0.954	0.966667	1.16182	1.30632	1.167	1.21172	1.32003	0.836103	0.849239	1.00179	1.29915	1.58974	1.64103	1.50997	1.66972	0.752294	0.844037	1.08869	0.919755	1.14122	0.997615	1.01953	1.117	1.07489	1.10304	1.09831	1.00515	0.64006	1.00704	0.884084	0.880453	0.676386	0.318658	0.625166
Mebendazole		1.324	1.048	1.275	1.21567	0.28	0.122	0.087	0.163	0.905703	0.90031	0.702444	0.836153	0.927	0.521	0.544	0.664	5.73578	6.08078	6.01719	5.94458	2.9602	7.49945	6.90497	5.7882	6.70085	5.62393	6.76923	6.36467	0.862385	0.954128	0.623853	0.813456	0.797293	0.804125	0.773961	0.791793	0.727419	0.690375	0.649009	0.688934	0.2206	0.195475	0.317841	0.244639	0.0136577	0.00350082	0.0618932	0.0263506
Molindone hydrochloride		1.463	1.534	1.428	1.475	1.062	1.209	0.971	1.08067	1.08225	1.1677	1.12579	1.12525	0.964	0.884	0.862	0.903333	1.2708	1.21239	1.51922	1.33413	1.41447	1.22749	1.61917	1.42037	1.64103	1.64103	1.91453	1.73219	1.55963	1.54128	1.63303	1.57798	0.955978	0.996455	1.02288	0.991771	1.11786	1.13218	1.01871	1.08958	1.27302	0.661238	2.02036	1.31821	0.803985	0.984618	0.480799	0.756468
Atenolol		1.1	1.192	1.132	1.14133	1.193	1.197	1.278	1.22267	1.09259	1.02849	1.08808	1.06972	0.884	0.905	0.836	0.875	1.90164	1.51125	0.9067	1.43987	1.00697	1.21067	1.09185	1.10316	1.84615	1.58974	0.905983	1.44729	1.24771	1.50459	1.44954	1.40061	0.949017	1.05034	0.980857	0.993404	1.28493	1.08168	1.22381	1.19681	1.89901	2.1391	5.19149	3.07653	1.07085	1.70129	1.39655	1.38957
Flubendazole		0.752	0.86	1.022	0.878	0.795	0.774	0.795	0.788	1.03053	0.849515	1.14085	1.00697	1.058	1.039	1.035	1.044	1.3646	1.17181	1.28887	1.27509	0.799682	0.730321	0.488705	0.672903	0.905983	0.888889	1.16239	0.985755	0.66055	0.587156	0.40367	0.550459	0.839317	0.870899	1.11337	0.941197	1.14873	1.00475	0.994629	1.04937	0.0760645	1.43958	0.851823	0.789157	0.868916	0.535231	0.172946	0.525698
Oxymetholone		1.794	1.797	1.687	1.75933	0.447	0.378	0.332	0.385667	1.14558	1.23391	1.16497	1.18149	0.402	0.5	0.556	0.486	0.41024	0.484956	0.436283	0.443826	1.06618	1.40163	0.904667	1.12416	0.649573	0.769231	0.649573	0.689459	0.495413	0.550459	0.311927	0.452599	1.06026	1.17912	1.2816	1.17366	1.06452	1.15947	0.910539	1.04484	0.234235	0.451134	0.174689	0.286686	0.589769	0.448899	1.11213	0.716932
Cefazolin sodium		1.454	1.215	1.207	1.292	1.026	1.197	0.87	1.031	1.19035	0.999155	1.115	1.1015	0.887	0.84	0.788	0.838333	1.18559	1.40291	1.28344	1.29064	1.25684	1.46164	1.56374	1.42741	1.52137	1.50427	1.36752	1.46439	1.33945	1.81651	1.41284	1.52294	1.01386	0.969384	1.04621	1.00982	1.13935	0.858554	1.11638	1.03809	0.937925	2.02002	1.8515	1.60315	0.997047	1.3206	0.498044	0.938563
Methimazole		1.385	1.31	0.947	1.214	1.257	1.587	1.711	1.51833	1.09341	1.07121	1.10437	1.08966	0.884	0.986	0.939	0.936333	2.09772	1.58217	1.55474	1.74488	1.41964	1.70306	1.25943	1.46071	2.5641	1.82906	1.29915	1.89744	1.85321	2.80734	2.23853	2.29969	1.00715	0.960877	1.06684	1.01162	1.13861	1.07131	0.971291	1.0604	3.29196	3.21138		3.25167	1.38986	2.26014	0.982052	1.54402
Danazol		1.331	1.422	1.138	1.297	0.994	0.756	0.886	0.878667	1.11263	1.12432	0.828824	1.02192	0.932	0.85	0.894	0.892	0.276359	0.422377	0.646523	0.44842	1.04846	0.700766	0.678077	0.809102	0.324786	0.529915	0.649573	0.501425	1.08257	0.550459	0.623853	0.752294	1.07212	1.12253	1.09752	1.09739	1.0013	1.07341	0.844601	0.973102	0.618962	0.223164	2.68579	1.17597	0.418922	0.249704	0.330072	0.332899
Nalidixic acid		1.436	1.022	0.988	1.14867	0.976	1.12	0.877	0.991	0.996291	0.835061	0.830099	0.88715	0.957	1.091	1.194	1.08067	1.24134	1.26991	1.31327	1.27484	1.39317	0.914718	0.745348	1.01775	1.57265	1.1453	1.1453	1.28775	1.41284	1.06422	0.678899	1.05199	0.960103	0.90506	1.06387	0.976345	1.19578	1.14947	0.833241	1.0595	1.4616	5.74036	2.63786	3.27994	0.282455	0.427253	0.177636	0.295781
Prednisolone acetate	75	1.508	1.366	1.845	1.573	2.018	1.792	1.806	1.872	1.29608	1.23464	1.29727	1.276	1.012	0.957	0.97	0.979667	1.2271	1.9283	1.71675	1.62405	1.14996	1.40006	1.40139	1.31713	2.14433	3.05155	3.6701	2.95533	2.17647	2.35294	2.37255	2.30065	0.872738	0.853522	0.941232	0.889164	0.994797	1.02788	1.11872	1.04713	4.34286	4.23861	0.934996	3.17216	0.805753	0.506991	0.465776	0.59284
Meclizine hydrochloride		1.555	1.556	1.216	1.44233	1.244	1.025	1.067	1.112	1.0763	0.967534	1.03853	1.02745	0.943	0.888	0.92	0.917	0.617945	0.422893	0.541307	0.527381	0.420305	0.469126	0.254868	0.381433	1.1134	0.762887	0.762887	0.879725	0.490196	0.45098	0.254902	0.398693	1.1183	0.915886	0.880519	0.971569	0.774069	0.866897	0.593675	0.74488	0.0275856	0.105807	0.0226623	0.0520185	0.0603744	0.0786647	0.0375389	0.0588593
Mitoxantrone hydrochloride		0.115	0.086	0.086	0.0956667	0.004	0.025	0.004	0.011	1.50609	1.60649	1.56997	1.56085	1.271	1.271	0.635	1.059	0.308627	0	1.02879	0.445805	0	0	0	0	0.0412371	0	0.103093	0.04811	0	0	0	0	0.446684	0	1.05735	0.501346	0	0	0	0	0.00131752	0.000292092	0.000410876	0.000673497	0.000359556	0.000396245	0.000152901	0.000302901
Clobetasol propionate		1.405	1.173	0.982	1.18667	1.216	1.202	1.04	1.15267	1.31664	1.28949	1.21552	1.27388	0.91	0.908	0.859	0.892333	1.16488	0.970915	0.761049	0.965615	1.20422	1.00871	1.30652	1.17315	1.89691	1.31959	0.865979	1.36082	1.37255	1.13725	1.27451	1.26144	0.884645	0.816858	1.07669	0.926063	0.861869	0.938212	1.17133	0.990472	5.7626	1.89635	4.95329	4.20408	0.917463	0.629886	0.800245	0.782531
Isotretinoin		1.537	2.2	2.542	2.093	1.357	1.191	1.11	1.21933	1.28204	1.14969	1.26192	1.23122	0.845	0.782	0.815	0.814	0.150511	0.194163	0.195941	0.180205	0.940028	0.930485	1.56361	1.14471	0.268041	0.494845	0.57732	0.446735	1.19608	1.03922	1.62745	1.28758	1.00147	1.09072	0.968464	1.02022	0.867364	0.864909	0.820015	0.850763	0.182349	0.115554	0.0921465	0.130017	0.15679	0.192856	0.225666	0.191771
Prednisolone sodium succinate		1.893	1.558	1.985	1.812	1.223	1.528	1.344	1.365	1.37233	1.27843	1.36767	1.33948	0.906	0.932	0.984	0.940667	1.58807	1.80396	1.20093	1.53099	1.64128	1.45021	1.54064	1.54404	3.48454	3.25773	2.76289	3.16838	1.88235	2.07843	1.94118	1.96732	0.892897	0.835131	0.847863	0.858631	0.993745	1.06144	1.06237	1.03918	2.52597	6.49299	4.48755	4.50217	0.517458	0.707279	1.00614	0.743625
Testosterone		1.248	1.353	1.234	1.27833	0.55	0.614	0.807	0.657	1.00145	1.05244	1.17943	1.07777	0.962	0.893	0.879	0.911333	1.14009	0.788998	1.39855	1.10921	1.06397	1.29331	1.06286	1.14005	1.64948	1.23711	2	1.62887	0.54902	0.745098	0.803922	0.699346	0.966342	0.922252	0.750722	0.879772	0.890279	1.19612	0.896943	0.994447	0.622155	0.263598	0.718924	0.534892	0.252917	0.405091	0.132931	0.263647
Glyburide		2.09	1.744	1.565	1.79967	1.815	1.657	1.287	1.58633	1.31893	1.18404	1.14146	1.21481	0.984	0.973	0.861	0.939333	1.72831	2.08128	1.23875	1.68278	1.53243	1.06031	1.55961	1.38411	4.18557	4.20619	2.24742	3.54639	2.60784	1.64706	1.88235	2.04575	1.02517	0.960802	1.0293	1.00509	0.936342	1.14035	0.993862	1.02352	1.50413	4.80117	4.45983	3.58838	0.691442	0.464426	0.463341	0.539736
Metaproterenol		1.567	1.62	1.506	1.56433	1.038	1.413	1.08	1.177	1.07367	1.05853	1.09428	1.07549	0.955	0.998	0.896	0.949667	1.16923	0.911757	1.13407	1.07168	1.0673	0.976422	1.31673	1.12015	2.12371	1.71134	1.97938	1.93814	1.03922	1.29412	1.33333	1.22222	1.05653	1.1137	0.962806	1.04435	0.983457	1.15228	0.943941	1.02656	0.300799	0.431304	0.222475	0.318192	0.131757	0.128804	0.140703	0.133755
Procainamide hydrochloride		2.167	2.164	1.983	2.10467	1.638	1.289	1.214	1.38033	1.27761	1.17759	1.2161	1.22377	0.983	0.921	0.998	0.967333	1.55163	1.58708	1.75814	1.63228	1.36621	1.26535	1.08549	1.23902	3.89691	3.97938	4.04124	3.97251	2.09804	1.52941	1.23529	1.62092	0.922841	0.874153	0.987091	0.928028	1.13755	1.15052	1.08213	1.1234	1.42246	3.50295	2.52669	2.48403	0.416286	0.284237	0.465922	0.388815
Secoisolariciresinol		1.783	1.47	1.304	1.519	0.633	0.854	0.727	0.738	1.20199	1.10178	1.02149	1.10842	0.957	0.878	0.882	0.905667	1.1871	1.02879	1.0913	1.1024	1.05675	1.02879	1.09237	1.05931	2.45361	1.75258	1.64948	1.95189	0.627451	0.823529	0.745098	0.732026	0.860242	0.977306	0.871205	0.902918	0.947448	1.35231	0.940317	1.08003	0.269999	0.511897	0.450256	0.410717	0.408053	0.457063	0.261224	0.375447
Resveratrol		1.629	1.816	1.23	1.55833	1.459	1.346	1.649	1.48467	1.28919	1.28832	1.29067	1.28939	0.926	0.89	0.899	0.905	1.86815	1.83221	1.4026	1.70099	1.43356	2.00466	1.81337	1.75053	3.52577	3.85567	2	3.12715	1.96078	2.52941	2.80392	2.43137	0.971648	1.02682	1.04816	1.01554	1.09721	1.03478	1.09382	1.07527	8.35152	11.6848	10.9535	10.3299	1.09435	0.781824	1.17638	1.01752
Troxipide		1.508	1.185	1.929	1.54067	1.515	1.168	1.56	1.41433	1.21233	0.948169	1.23217	1.13089	0.999	0.928	0.987	0.971333	0.967557	0.885586	1.09733	0.983491	0.99362	1.10957	1.00505	1.03608	1.69072	1.21649	2.45361	1.78694	1.41176	1.21569	1.47059	1.36601	0.994754	0.913646	0.904922	0.937774	0.992927	1.04624	0.890513	0.976559	0.166072	0.245482	0.0883331	0.166629	0.133189	0.150494	0.164642	0.149442
Cortisone		1.612	1.668	1.193	1.491	0.795	1.187	1.806	1.26267	1.20425	1.23395	1.06687	1.16836	0.915	1.006	1.074	0.998333	0.772406	0.863859	0.939904	0.858723	1.34092	1.09193	0.694924	1.04259	1.4433	1.6701	1.29897	1.47079	1	1.21569	1.17647	1.13072	0.958915	0.874388	0.933923	0.922409	1.09663	0.821418	1.17168	1.02991	0.409186	0.190132	0.513603	0.370974	0.115725	0.193579	0.179002	0.162769
11-Deoxycortisol		1.985	1.724	1.686	1.79833	1.157	0.564	1.046	0.922333	1.22295	1.2471	1.15337	1.20781	1.051	0.901	0.904	0.952	1.06652	1.34156	1.11846	1.17551	0.975867	1.22463	1.29953	1.16668	2.45361	2.68041	2.18557	2.43986	1.05882	0.647059	1.27451	0.993464	0.875921	0.903625	1.05252	0.944022	0.929795	0.986029	0.83802	0.917948	0.838458	0.622758	0.729018	0.730078	0.319969	0.236014	0.320971	0.292318
Taxifolin-(+)		1.36	1.353	1.162	1.29167	0.901	0.841	1.01	0.917333	1.1699	1.07113	1.30421	1.18175	0.962	0.954	0.974	0.963333	1.80515	1.80159	0.765592	1.45744	1.04455	1.19412	0.765936	1.00153	2.84536	2.82474	1.03093	2.23368	0.882353	0.941176	0.72549	0.849673	0.95809	0.94807	0.856941	0.921034	0.85883	0.980184	1.02028	0.953099	2.02329	2.52739	3.45493	2.66854	0.291436	0.187287	0.15726	0.211994
Dehydroepiandrosterone		1.436	1.708	1.11	1.418	0.912	0.861	1.076	0.949667	0.945523	1.06114	1.08963	1.0321	0.851	0.823	0.852	0.842	1.13999	1.15639	1.3628	1.21973	1.28377	0.84982	0.8162	0.983264	1.89691	2.28866	1.75258	1.97938	1.09804	0.686275	0.823529	0.869281	1.10486	1.00206	0.851164	0.98603	1.09581	1.00777	0.945344	1.01631	0.121097	0.522245	0.0844201	0.242587	0.157962	0.0909976	0.0776328	0.108864
Benzylimidazole		1.223	1.423	1.994	1.54667	1.323	1.364	1.519	1.402	1.226	1.12251	1.46124	1.26992	0.965	1.034	1.039	1.01267	0.9163	1.11264	0.918868	0.982602	1.24871	1.45598	0.757171	1.15395	1.29897	1.83505	2.12371	1.75258	1.54902	1.86275	1.07843	1.49673	0.984615	1.00866	0.860242	0.951174	0.870988	0.985094	1.21214	1.02274	0.343453	0.317542	0.270317	0.310437	0.115233	0.0733513	0.124037	0.104207
MDL 73005EF hydrochloride		1.621	1.839	1.402	1.62067	1.419	1.008	1.589	1.33867	1.13331	1.13289	1.03169	1.0993	1.011	0.924	0.931	0.955333	0.822972	1.03501	0.93941	0.932464	0.707351	1.41026	1.09248	1.07003	1.54639	2.20619	1.52577	1.75945	0.941176	1.33333	1.62745	1.30065	1.0214	0.903743	0.957265	0.960802	0.941486	0.896358	0.95002	0.929288	0.16222	0.544738	0.480516	0.395825	0.362316	0.254544	0.264329	0.29373
GR 79236		2.095	1.785	1.275	1.71833	1.297	1.909	1.306	1.504	1.3758	1.25206	1.33914	1.32233	0.857	0.888	0.928	0.891	1.58797	1.44506	0.781196	1.27141	1.7256	1.22674	1.68122	1.54452	3.85567	2.98969	1.15464	2.66667	2.09804	2.19608	2.05882	2.11765	0.8514	0.871677	0.952078	0.891718	1.04554	0.953411	1.01806	1.00567	5.64026	5.98085	6.65802	6.09304	0.490296	0.435897	0.472209	0.466134
Dactinomycin		0.405	0.407	0.585	0.465667	0.109	0.058	0.058	0.075	0.272623	0.504044	0.647085	0.474584	0.657	0.328	0.164	0.383	0.131648	0.131055	0	0.0875677	0	0	0	0	0.0618557	0.0618557	0	0.0412371	0	0	0	0	0.810492	0.835485	0	0.548659	0	0	0	0	0.00234001	0.00160234	0.00187025	0.00193753	0.00020428	0.000337726	0.000161912	0.000234639
Methotrexate trihydrate		1.445	1.056	0.987	1.16267	0.907	1.212	1.212	1.11033	1.20842	0.99589	1.06175	1.08869	0.932	0.956	1.069	0.985667	1.6255	1.04489	0.973187	1.21452	1.17648	1.17337	0.776477	1.04211	2.72165	1.27835	1.1134	1.70447	1	1.33333	0.882353	1.0719	0.908223	0.938992	1.04497	0.964063	1.1151	1.12889	1.02309	1.08903	0.806355	0.325998	0.510529	0.547627	0.132191	0.281944	0.164515	0.192883
Piceid		1.198	1.394	1.293	1.295	1.142	0.861	0.767	0.923333	1.05414	1.09815	1.08862	1.0803	1.084	0.959	0.965	1.00267	0.935657	0.96973	1.29297	1.06612	1.19012	1.57814	1.3904	1.38622	1.29897	1.56701	1.93814	1.60137	1.27451	1.27451	1	1.18301	0.884881	0.974005	0.988388	0.949091	0.919507	1.05302	1.12398	1.03217	0.440524	0.596604	0.747418	0.594848	0.754878	0.47622	0.389482	0.540194
Budesonide		1.461	1.488	1.245	1.398	1.353	1.417	1.238	1.336	1.3441	1.29	1.36702	1.33371	0.848	0.926	0.874	0.882667	1.43697	1.82934	1.34344	1.53658	1.09725	1.41648	1.16527	1.22633	2.43299	3.15464	1.93814	2.50859	1.39216	1.88235	1.35294	1.54248	0.861538	0.955615	0.971412	0.929522	1.00532	0.967908	0.952709	0.975312	6.71144	9.41481	14.9448	10.357	0.587485	0.638948	0.648429	0.624954
					#DIV/0!	#N/A	#N/A	#N/A	#N/A				#DIV/0!	#N/A	#N/A	#N/A	#N/A				#DIV/0!	#N/A	#N/A	#N/A	#N/A				#DIV/0!	#N/A	#N/A	#N/A	#N/A				#DIV/0!	#N/A	#N/A	#N/A	#N/A				#DIV/0!	#N/A	#N/A	#N/A	#N/A
					#DIV/0!	#N/A	#N/A	#N/A	#N/A				#DIV/0!	#N/A	#N/A	#N/A	#N/A				#DIV/0!	#N/A	#N/A	#N/A	#N/A				#DIV/0!	#N/A	#N/A	#N/A	#N/A				#DIV/0!	#N/A	#N/A	#N/A	#N/A				#DIV/0!	#N/A	#N/A	#N/A	#N/A
					#DIV/0!	#N/A	#N/A	#N/A	#N/A				#DIV/0!	#N/A	#N/A	#N/A	#N/A				#DIV/0!	#N/A	#N/A	#N/A	#N/A				#DIV/0!	#N/A	#N/A	#N/A	#N/A				#DIV/0!	#N/A	#N/A	#N/A	#N/A				#DIV/0!	#N/A	#N/A	#N/A	#N/A
					#DIV/0!	#N/A	#N/A	#N/A	#N/A				#DIV/0!	#N/A	#N/A	#N/A	#N/A				#DIV/0!	#N/A	#N/A	#N/A	#N/A				#DIV/0!	#N/A	#N/A	#N/A	#N/A				#DIV/0!	#N/A	#N/A	#N/A	#N/A				#DIV/0!	#N/A	#N/A	#N/A	#N/A
Raclopride	85	1.267	1.365	1.338	1.32333	0.979	0.992	0.997	0.989333	0.887795	0.954631	0.923654	0.922027	1.004	1.019	0.993	1.00533	0.830241	0.639898	0.825794	0.765311	0.906332	0.727696	1.00283	0.878953	1.05357	0.875	1.10714	1.0119	0.8	0.650847	0.901695	0.784181	0.938556	1.0243	0.961236	0.974697	0.960495	0.833262	0.979871	0.924543	0.67171	1.64174	0.257191	0.856881	0.499457	0.967829	0.550472	0.672586
Modafinil		1.551	1.724	1.383	1.55267	1.014	1.057	1.154	1.075	1.28541	1.28057	1.12169	1.22922	0.985	0.997	1.006	0.996	1.18335	1.35438	1.63659	1.39144	1.42444	1.40805	1.83027	1.55425	1.83929	2.33929	2.26786	2.14881	1.30169	1.34237	1.90508	1.51638	1.14464	1.14244	0.980444	1.08918	0.893434	0.932616	0.882024	0.902691	3.13246	2.22023	3.42454	2.92574	2.1804	1.92734	2.07546	2.06107
HTMT dimaleate		1.521	1.811	1.721	1.68433	1.04	1.272	1.18	1.164	1.05381	1.31407	1.2401	1.20266	0.995	1.015	1.003	1.00433	0.726811	0.659466	0.745616	0.710631	0.390249	0.372446	0.465102	0.409266	1.10714	1.19643	1.28571	1.19643	0.366102	0.427119	0.494915	0.429379	0.994446	1.00116	1.00787	1.00116	0.808396	0.829709	0.869537	0.835881	0.0186558	0.479597	0.311524	0.269926	0.334881	0.69752	0.289927	0.440776
Mestanolone		1.279	1.645	1.455	1.45967	1.02	0.84	0.794	0.884667	1.03341	1.21006	1.14538	1.12962	0.969	0.948	0.956	0.957667	1.11461	0.920712	1.05375	1.02969	0.847866	1.36071	1.54461	1.25106	1.42857	1.51786	1.53571	1.49405	0.779661	1.03051	1.10508	0.971751	0.955103	1.14256	0.889956	0.995873	0.97395	0.995048	1.07061	1.0132	0.6225	0.0250227	0.381853	0.343125	0.718595	1.40303	1.81375	1.31179
Oxyphenonium bromide		1.92	1.397	1.384	1.567	0.955	0.99	0.983	0.976	1.35865	1.19479	1.07684	1.21009	0.987	0.993	0.999	0.993	1.11385	1.14816	1.24879	1.17027	0.771799	0.979567	0.9561	0.902488	2.14286	1.60714	1.73214	1.82738	0.664407	0.874576	0.847458	0.79548	0.90685	1.0825	1.07741	1.02226	0.914101	0.999462	0.922067	0.94521	0.394661	0.413744	0.45656	0.421655	0.780272	0.777017	0.406848	0.654712
Pilocarpine hydrochloride		1.349	1.603	1.084	1.34533	0.999	1.011	1.098	1.036	1.07177	1.23983	0.981271	1.09762	0.998	0.99	1.002	0.996667	1.09632	1.31182	1.46302	1.29039	0.820352	0.743476	0.897431	0.820419	1.48214	2.10714	1.58929	1.72619	0.738983	0.677966	0.888136	0.768362	0.885443	1.07429	1.06168	1.00714	0.84521	0.791066	0.950807	0.862361	0.212813	0.306838	1.26174	0.593798	0.659249	0.614861	0.512641	0.595584
Tinidazole		1.585	1.71	1.693	1.66267	0.995	1.024	1.156	1.05833	1.30635	1.34884	1.2964	1.3172	1.005	0.998	1.006	1.003	0.652224	0.813088	1.25273	0.906014	1.02731	1.25572	1.21647	1.1665	1.03571	1.39286	2.125	1.51786	0.922034	1.15932	1.2678	1.11638	1.00984	1.06098	0.968179	1.013	0.817761	1.07341	0.891927	0.9277	0.134652	0.295618	0.505387	0.311886	0.556989	0.520296	0.432922	0.503402
Dihydrexidine hydrochloride		2.257	1.961	1.793	2.00367	1.303	1.438	1.283	1.34133	1.55403	1.46041	1.34166	1.45203	1.026	0.995	0.993	1.00467	0.608132	0.618043	0.755654	0.66061	0.513453	0.616832	0.668218	0.599501	1.375	1.21429	1.35714	1.31548	0.60339	0.8	0.772881	0.725424	0.954062	0.946772	0.966674	0.955836	0.88676	0.975565	0.854575	0.905633	0.450979	0.337601	0.252027	0.346869	0.674738	0.812968	0.490897	0.659534
AM-251		1.422	0.805	1.16	1.129	0.388	0.492	0.508	0.462667	1.03473	0.822957	1.15337	1.00369	0.789	0.837	0.882	0.836	0.488691	0.509149	0.599238	0.532359	0.716973	0.855756	0.739429	0.77072	0.696429	0.410714	0.696429	0.60119	0.250847	0.379661	0.338983	0.323164	0.85177	1.1907	1.03043	1.0243	0.923681	1.02207	1.01668	0.987478	0.100048	0.218474	0.0722841	0.130269	0.269999	0.811835	0.414199	0.498677
Milrinone		1.622	1.606	1.197	1.475	1.283	1.396	1.337	1.33867	1.31822	1.4241	1.24335	1.32856	1.029	1.04	1.018	1.029	1.29708	1.13189	1.17675	1.20191	0.873559	0.904916	0.927777	0.902084	2.10714	1.82143	1.41071	1.77976	1.01017	1.13898	1.11864	1.08927	0.963319	1.03437	0.930224	0.97597	0.932939	0.904952	0.932616	0.923502	0.683892	0.431321	0.403645	0.506286	0.753219	0.516233	0.629841	0.633098
Valsartan		1.812	1.631	1.875	1.77267	1.187	1.1	1.191	1.15933	1.3113	1.43527	1.40984	1.38547	1.019	1.019	1.019	1.019	0.688437	0.950572	0.893393	0.844134	1.04552	1.1756	1.17439	1.13184	1.25	1.55357	1.67857	1.49405	1.11864	1.1661	1.26102	1.18192	1.17126	0.962162	0.944689	1.02604	0.914209	0.829709	1.01335	0.919089	0.178145	0.3024	0.304086	0.261544	0.760439	0.62157	0.523323	0.635111
2-Pyridylethylamine		1.903	2.187	2.063	2.051	1.406	1.292	1.224	1.30733	1.35056	1.45528	1.25518	1.35368	1.021	1.017	1.002	1.01333	1.13304	0.782465	0.976112	0.963871	0.77544	1.05321	1.01942	0.949356	2.16071	1.71429	2.01786	1.96429	0.983051	1.22712	1.12542	1.11186	1.02037	0.969452	0.985304	0.991707	0.903229	0.913671	0.917546	0.911482	0.375332	0.282068	0.405745	0.354382	0.821153	0.843418	0.693396	0.785989
Triptolide		0.835	0.826	0.769	0.81	0.233	0.254	0.288	0.258333	1.08017	1.13359	0.932443	1.04874	0.865	0.946	0.905	0.905333	0.0426938	0.043202	0.0231258	0.0363405	0.032369	0.562007	0.18248	0.258952	0.0357143	0.0357143	0.0178571	0.0297619	0.00677966	0.128814	0.0474576	0.0610169	0.540037	0.677274	0.430687	0.549333	0.507212	0.643165	0.914101	0.688159	0.00299157	0.00737382	0.00103492	0.00380011	0.0228964	0.0175374	0.00127255	0.0139021
Mirtazapine		1.637	1.737	1.101	1.49167	1.108	1.023	1.116	1.08233	1.34277	1.32813	1.3366	1.33583	1.032	1.016	1.037	1.02833	1.08882	1.06747	1.1493	1.10186	1.16002	0.889136	0.996965	1.01538	1.78571	1.85714	1.26786	1.6369	1.15932	0.820339	1.00339	0.99435	1.00301	1.10148	0.981601	1.0287	0.986006	0.912702	0.875027	0.924578	0.180465	0.215873	0.416857	0.271065	0.87357	0.327212	0.590443	0.597075
P1075		1.492	1.473	1.817	1.594	1.236	1.368	1.128	1.244	1.12912	1.22205	1.39419	1.24845	1.026	1.035	1.03	1.03033	0.800127	1.077	1.24612	1.04108	0.997572	0.973093	0.933441	0.968036	1.19643	1.58929	2.26786	1.68452	1.11186	1.2	0.949153	1.08701	1.14221	1.0199	1.08412	1.08208	0.982562	0.824435	0.912379	0.906459	0.223213	0.27951	0.38406	0.295594	0.963451	0.781189	0.75523	0.83329
Dextrorphan D-tartrate		1.685	1.697	1.926	1.76933	1.311	1.26	1.045	1.20533	1.38041	1.34009	1.39437	1.37162	1.024	1.011	1.007	1.014	1.35426	1.42821	0.731131	1.1712	0.986648	1.4736	1.13716	1.19914	2.28571	2.42857	1.41071	2.04167	1.1661	1.67458	1.07119	1.30395	1.06758	0.953599	1.10623	1.04247	0.865231	1.0141	0.878256	0.919196	0.439082	0.348764	0.228279	0.338708	0.634779	0.699635	0.719307	0.684574
Gabexate mesilate		1.986	1.582	1.814	1.794	0.938	1.166	1.09	1.06467	1.34241	1.30062	1.36122	1.33475	0.994	0.994	1	0.996	0.789708	1.12643	0.923761	0.946633	0.392879	0.651629	0.620878	0.555128	1.57143	1.78571	1.67857	1.67857	0.332203	0.684746	0.610169	0.542373	0.865078	1.07232	0.989123	0.975507	0.726588	0.880194	0.731001	0.779261	0.176136	0.300873	0.337907	0.271639	0.507421	0.744172	0.599298	0.616964
Dextromethorphan hydrobromide, monohydrate		1.487	1.662	0.776	1.30833	1.287	1.207	0.982	1.15867	1.06696	1.30131	1.25668	1.20831	1.013	1.012	0.962	0.995667	1.28259	1.04015	1.19479	1.17251	0.484928	0.647987	0.665992	0.599636	1.91071	1.73214	0.928571	1.52381	0.562712	0.705085	0.589831	0.619209	0.877227	0.986693	1.09558	0.9865	0.760172	0.940904	1.06426	0.92178	0.226557	0.220414	0.234428	0.227133	0.389998	0.363603	0.367111	0.373571
Tosufloxacin tosilate		2.578	3.389	3.201	3.056	1.196	1.159	1.192	1.18233	1.5927	1.84333	1.83813	1.75806	0.988	1.002	0.999	0.996333	0.801906	0.736341	0.941042	0.826429	1.25733	1.3949	1.26826	1.30683	2.07143	2.5	3.01786	2.52976	1.35593	1.45763	1.36271	1.39209	0.996297	0.933696	1.05323	0.994407	1.04467	0.868138	0.871798	0.928202	0.322776	1.51134	0.653252	0.829124	0.85186	0.664278	0.91119	0.809109
Ritonavir		1.328	1.546	1.819	1.56433	1.267	1.297	1.248	1.27067	1.14871	1.09019	1.27473	1.17121	1.017	1.016	1.029	1.02067	0.872173	0.645743	0.519187	0.679034	0.688448	0.753793	1.03055	0.824263	1.16071	1	0.946429	1.03571	0.786441	0.881356	1.15932	0.942373	0.965633	0.98461	0.930109	0.960117	0.919914	0.889236	0.901184	0.903445	0.467149	0.171473	0.31023	0.316284	0.851777	1.53482	1.27313	1.21991
Galanthamine hydrobromide		1.679	1.192	1.532	1.46767	1.072	0.886	1.042	1	1.3319	1.0901	1.4953	1.30576	1.027	0.988	1.013	1.00933	0.350318	0.582973	0.39568	0.44299	0.427878	0.678535	0.61319	0.573201	0.589286	0.696429	0.607143	0.630952	0.413559	0.542373	0.576271	0.510734	0.936936	0.909743	0.849456	0.898712	0.809688	0.728848	0.713994	0.750843	0.134936	0.0430981	0.0755473	0.0845273	0.559596	0.703736	0.327216	0.530183
Tegaserod maleate		0.414	0.49	0.15	0.351333	0.13	0.2	0.073	0.134333	1.0008	1.02814	0.0848915	0.704613	1.022	0.964	0.982	0.989333	0.559975	0.254892	0.593774	0.469547	0.115315	0.187943	0.516083	0.273113	0.232143	0.125	0.0892857	0.14881	0.0135593	0.0338983	0.0338983	0.0271186	0.412405	0.490511	0.640014	0.51431	0.444026	0.380086	0.42239	0.415501	#DIV/0!	0.0023101	0.000808533	#DIV/0!	0.000399575	0.000267236	0.000326596	0.000331136
Procysteine		1.565	1.317	1.492	1.458	1.169	1.146	1.023	1.11267	1.22098	1.25041	1.3703	1.28056	1.014	1.006	0.995	1.005	1.0817	1.25845	1.37332	1.23782	0.887518	1.25288	1.05826	1.06622	1.69643	1.66071	2.05357	1.80357	0.935593	1.29492	0.976271	1.06893	1.02627	0.99676	1.14788	1.05697	0.846825	0.957912	0.917223	0.90732	0.195665	9.29059	1.14541	3.54389	0.543471	0.423686	0.60654	0.524566
Nicorandil		1.269	1.55	2.087	1.63533	0.912	1.023	0.982	0.972333	1.21205	1.25575	1.53386	1.33389	0.978	0.998	1.011	0.995667	1.30572	1.02338	0.794155	1.04108	1.56706	1.35222	1.27837	1.39922	1.66071	1.58929	1.66071	1.6369	1.28814	1.24746	1.1322	1.2226	1.1841	1.07267	1.01504	1.0906	1.01464	0.874812	0.84155	0.910334	0.613968	0.442257	0.61145	0.555892	0.878432	0.841064	0.615618	0.778371
Pioglitazone hydrochloride		3.172	3.003	2.913	3.02933	1.183	1.179	0.984	1.11533	1.75374	1.78947	1.72324	1.75548	1.033	1.019	1.019	1.02367	2.07929	2.07128	1.98208	2.04422	2.19988	2.97936	2.7809	2.65338	6.60714	6.23214	5.78571	6.20833	2.34576	3.1661	2.4678	2.65989	0.702615	0.678431	0.787781	0.722942	0.771152	0.747147	0.655544	0.724614	0.670921	0.373072	0.548648	0.53088	0.386263	1.48292	0.582274	0.817153
Nefazodone hydrochloride		1.261	1.456	0.973	1.23	0.593	0.678	1.225	0.832	1.16963	1.30399	1.14206	1.20523	0.992	1.001	1.048	1.01367	0.537103	0.477382	0.677382	0.563956	1.58547	0.921101	0.595185	1.03392	0.678571	0.696429	0.660714	0.678571	0.847458	0.562712	0.657627	0.689266	1.05566	1.12567	0.841009	1.00744	0.795156	0.849946	0.666631	0.770578	0.473097	0.381425	1.02301	0.625844	1.44106	0.896147	0.645553	0.994253
Loxoprofen sodium		0.872	0.923	1.369	1.05467	1.026	1.121	0.996	1.04767	0.952951	1.03544	1.32168	1.10335	0.991	1.005	1.02	1.00533	1.18488	1.23583	0.989454	1.13672	1.10641	1.22719	1.35869	1.23076	1.03571	1.14286	1.35714	1.17857	1.02373	1.24068	1.22034	1.16158	0.981023	1.00324	1.04756	1.01061	0.925942	0.891389	0.848009	0.888446	4.46914	2.33634	1.28736	2.69761	0.682579	0.427706	0.313388	0.474558
Penciclovir		0.791	0.856	0.805	0.817333	0.924	1.112	1.01	1.01533	1.01472	1.07595	1.02869	1.03979	1.004	1.02	1.005	1.00967	1.21652	1.54142	1.21753	1.32516	1.28525	1.79183	1.59336	1.55681	0.964286	1.32143	0.982143	1.08929	1.07119	1.79661	1.45085	1.43955	0.936704	1.03749	1.07452	1.01624	0.895264	0.9507	1.01464	0.953534	0.597215	1.06011	0.70562	0.787647	0.816321	1.05611	0.499219	0.790551
7-Nitroindazole	86	1.141	1.136	1.277	1.18467	1.095	1.212	1.235	1.18067	1.0944	0.877076	1.20564	1.05904	1.002	1.016	1.038	1.01867	0.771599	0.964142	0.745225	0.826989	0.682874	0.855152	0.659361	0.732463	0.852174	1.06087	0.921739	0.944928	0.775862	1.07471	0.844828	0.898467	1.05882	1.15461	1.0716	1.09501	0.936112	0.972589	0.908972	0.939225	0.484104	0.270114	3.10916	1.28779	1.10983	0.718529	1.23791	1.02209
Glimepiride		1.255	1.287	1.441	1.32767	1.212	1.13	1.075	1.139	1.0389	1.11695	1.39673	1.18419	1.026	1.028	1.035	1.02967	1.11602	0.767572	0.860335	0.914642	0.744848	0.916546	0.897097	0.85283	1.35652	0.956522	1.2	1.17101	0.936782	1.07471	1	1.00383	1.0165	1.15188	1.14369	1.10402	0.95967	0.987136	0.956413	0.96774	1.0825	0.888477	0.192828	0.721269	1.07257	0.879767	0.778494	0.910275
Carmofur		0.904	1.258	1.178	1.11333	0.408	0.551	0.453	0.470667	0.755523	1.02672	1.11771	0.966653	0.792	0.854	0.825	0.823667	1.17202	0.985059	2.08913	1.4154	1.32932	0.844267	1.10044	1.09134	1.02609	1.2	2.38261	1.53623	0.563218	0.482759	0.517241	0.521073	1.15461	1.28937	0.827894	1.09062	0.790968	0.857624	0.887152	0.845248	0.16433	0.16903	0.651186	0.328182	1.75741	0.561483	0.833926	1.05094
Phenprobamate		1.425	1.525	1.341	1.43033	1.11	1.056	0.951	1.039	1.15239	1.124	1.00952	1.0953	1.011	0.982	0.987	0.993333	0.98285	1.37807	1.35273	1.23788	0.738607	0.976343	0.809579	0.841509	1.35652	2.03478	1.75652	1.71594	0.850575	1.06897	0.798851	0.90613	0.918228	1.14878	1.068	1.045	0.934918	0.988438	1.12305	1.01547	0.133632	1.54681	0.300241	0.660227	0.50142	0.830395	0.758737	0.696851
Vinorelbine tartrate		1.302	1.348	1.265	1.305	0.4	0.42	0.443	0.421	1.08723	0.902994	1.07268	1.02097	0.87	0.852	0.91	0.877333	0.427569	0.413018	0.369235	0.403274	0.52627	0.422206	0.350363	0.432946	0.53913	0.53913	0.452174	0.510145	0.218391	0.183908	0.16092	0.187739	0.85085	0.789056	0.871944	0.837283	0.715736	0.779243	0.902785	0.799255	0.506006	0.262945	0.292485	0.353812	0.379919	0.365773	0.673689	0.473127
Ampiroxicam		1.767	1.394	1.271	1.47733	1.241	1.079	1.142	1.154	1.12827	1.3057	1.02156	1.15184	1.01	0.982	1.03	1.00733	1.34195	1.09562	1.04612	1.16123	0.540348	0.549347	0.538462	0.542719	2.29565	1.47826	1.28696	1.68696	0.695402	0.614943	0.637931	0.649425	1.02618	1.01365	1.21578	1.0852	0.936981	0.818542	0.815828	0.857117	0.703819	0.932477	0.871645	0.835981	0.642369	0.486197	0.602681	0.577082
Remacemide hydrochloride		1.432	1.539	1.775	1.582	1.194	1.388	1.332	1.30467	1.33543	1.38029	1.5568	1.42417	0.991	1.032	1.015	1.01267	1.1537	1.12057	0.870209	1.04816	0.598549	0.62656	0.532366	0.585825	1.6	1.66957	1.49565	1.58841	0.741379	0.902299	0.735632	0.793103	0.934359	0.992555	1.05485	0.99392	0.832003	0.850893	0.841665	0.841521	0.592325	1.99632	1.30192	1.29685	0.470114	0.481326	0.465613	0.472351
Betaxolol hydrochloride		1.409	2.093	1.739	1.747	1.334	1.324	1.261	1.30633	1.32245	1.32326	1.23724	1.29432	1.031	1.017	1.023	1.02367	0.930752	0.840977	1.25997	1.01057	0.780987	0.8791	1.14717	0.935752	1.26957	1.70435	2.12174	1.69855	1.08046	1.2069	1.5	1.26245	1.00769	0.991934	0.97357	0.991066	0.948488	0.964664	1.01167	0.974941	1.84215	1.19017	0.96078	1.33103	0.875451	1.31894	1.26791	1.1541
Artemether		2.204	1.51	2.207	1.97367	1.118	1.096	1.067	1.09367	1.4217	1.12092	1.52124	1.35462	1.022	1.003	0.986	1.00367	0.611277	1.61803	1.04196	1.09042	0.560087	0.692888	0.649057	0.634011	1.30435	2.36522	2.22609	1.96522	0.649425	0.787356	0.718391	0.718391	0.86574	0.921454	1.01712	0.934773	0.899962	0.887803	0.820388	0.869384	0.645177	0.683176	0.647252	0.658535	1.06904	1.20901	0.729912	1.00265
Synephrine		1.783	1.996	1.521	1.76667	1.206	0.909	1.085	1.06667	1.28665	1.35785	1.61097	1.41849	1.007	1.006	1.021	1.01133	1.0877	0.827725	0.909445	0.941622	0.431785	0.640058	0.66894	0.580261	1.87826	1.6	1.33913	1.6058	0.54023	0.603448	0.752874	0.632184	1.00472	1.10895	1.04157	1.05174	0.98225	0.937307	0.883352	0.934303	0.983784	1.12463	0.954474	1.02096	0.947196	0.480746	0.600945	0.676295
R(+)-SCH-23390 hydrochloride		1.206	1.59	1.46	1.41867	0.995	1.106	1.409	1.17	1.07146	1.42765	1.41436	1.30449	0.996	0.981	1.014	0.997	1.1472	1.08458	0.78745	1.00641	0.623803	0.746734	0.538897	0.636478	1.33913	1.66957	1.11304	1.37391	0.643678	0.856322	0.787356	0.762452	1.23775	1.17558	1.24991	1.22108	0.921348	0.887695	0.969115	0.926053	0.710716	1.60193	2.23729	1.51665	0.839839	0.502115	0.756837	0.699597
Nalbuphine hydrochloride		1.407	1.41	1.619	1.47867	1.256	1.172	1.263	1.23033	1.23991	1.29694	1.16613	1.23433	1.003	1.013	1.038	1.018	1.25075	1.12083	0.998571	1.12338	0.749782	0.826996	0.974311	0.850363	1.70435	1.53043	1.56522	1.6	0.977011	1.00575	1.27586	1.08621	1.06887	1.01787	1.07644	1.05439	0.979862	0.88205	0.947403	0.936438	1.87955	0.746088	2.57944	1.73503	0.847892	0.921064	0.920726	0.896561
Cephalexin hydrate		1.717	1.848	1.759	1.77467	1.083	1.1	1.154	1.11233	1.10852	1.14736	1.25011	1.16866	1.003	1.015	1.013	1.01033	0.857737	1.22437	1.31766	1.13326	0.685776	0.58926	0.643106	0.639381	1.42609	2.1913	2.24348	1.95362	0.770115	0.672414	0.770115	0.737548	1.00236	0.958928	0.972825	0.978037	0.973566	1.03924	0.868371	0.960394	0.872572	0.826792	0.990301	0.896555	0.994734	0.694506	1.16127	0.950169
Lofepramine		1.271	1.298	0.914	1.161	0.773	0.802	0.883	0.819333	1.11198	1.33467	1.08052	1.17572	1.002	0.981	1.004	0.995667	0.763414	1.1207	0.746914	0.877008	1.03919	0.960668	0.827866	0.942574	0.93913	1.4087	0.66087	1.0029	0.833333	0.798851	0.758621	0.796935	1.07371	0.837697	0.891798	0.9344	0.742442	0.761114	0.90159	0.801715	0.536357	0.983719	0.63648	0.718852	1.1156	1.02063	0.931318	1.02252
Meropenem		1.253	1.152	1.669	1.358	1.266	1.21	1.298	1.258	1.04119	1.02996	1.60587	1.22567	1.011	1.011	1.011	1.011	1.36235	1.13863	0.979473	1.16015	0.463861	0.741945	0.704354	0.63672	1.65217	1.26957	1.58261	1.50145	0.609195	0.931034	0.948276	0.829502	1.04901	1.15535	1.05075	1.08504	0.915812	0.961624	0.914075	0.930504	2.57741	0.983205	1.57611	1.71224	0.803813	0.754785	0.765787	0.774795
Orlistat		1.655	1.814	1.976	1.815	1.216	1.338	1.295	1.283	1.32656	1.47733	1.4051	1.403	0.984	0.986	1.009	0.993	0.694686	0.614005	0.509159	0.60595	0.296226	0.397678	0.299565	0.331156	1.11304	1.07826	0.973913	1.05507	0.373563	0.551724	0.402299	0.442529	1.1087	0.930264	0.935972	0.991645	0.917657	0.785431	0.90235	0.86848	0.625866	0.444099	0.0958509	0.388605	0.364114	0.275434	0.240965	0.293504
Lansoprazole		2.09	1.579	1.709	1.79267	1.124	1.191	1.19	1.16833	1.35026	1.02466	1.26835	1.21442	1.005	1.026	1.01	1.01367	0.807717	1.13772	1.15629	1.03391	0.779245	0.6791	0.744702	0.734349	1.63478	1.73913	1.91304	1.76232	0.908046	0.83908	0.91954	0.888889	1.153	0.994416	1.04306	1.06349	1.01623	0.810291	0.881941	0.902821	1.94114	1.2005	2.9173	2.01964	1.56958	1.34271	1.82287	1.57839
DuP 697		1.707	1.425	1.006	1.37933	0.917	0.818	0.92	0.885	1.10935	0.9498	0.882354	0.980503	1.013	0.977	1.003	0.997667	0.873197	0.831753	0.731714	0.812221	0.477213	0.609869	0.487954	0.525012	1.44348	1.14783	0.713043	1.10145	0.454023	0.517241	0.465517	0.478927	1.05236	1.07706	0.994292	1.04124	0.792053	0.895728	0.913206	0.866996	0.0477153	0.772151	0.876997	0.565621	0.535014	0.434818	0.487052	0.485628
Procarbazine hydrochloride		1.125	1.197	1.658	1.32667	1.177	1.332	1.233	1.24733	0.996067	1.2734	1.37867	1.21605	0.993	1.025	1.013	1.01033	1.00559	1.24516	1.18111	1.14395	0.66865	0.782003	0.727721	0.726125	1.09565	1.44348	1.89565	1.47826	0.816092	1.08046	0.931034	0.942529	1.07917	1.10696	1.09865	1.09492	0.941215	1.03707	0.966401	0.981563	1.58373	1.14091	0.988381	1.23767	0.718223	0.713527	0.601366	0.677706
Nornicotine		1.468	1.56	1.989	1.67233	1.108	1.038	0.909	1.01833	1.20546	1.32409	1.35789	1.29582	1.017	0.995	0.983	0.998333	1.11329	0.875406	0.893855	0.960851	1.05486	1.18999	1.20087	1.14857	1.58261	1.32174	1.72174	1.54203	1.21264	1.28161	1.13218	1.20881	1.00968	1.0299	0.913017	0.9842	0.889974	0.981273	1.05303	0.97476	1.77846	2.10726	0.893954	1.59322	0.932721	0.943281	0.937303	0.937768
Enalaprilat		1.713	1.847	1.837	1.799	1.223	1.238	1.116	1.19233	1.25622	1.27596	1.34523	1.29247	1.009	1.006	0.997	1.004	0.964662	0.8363	0.997142	0.932701	0.693033	0.541509	0.625835	0.620126	1.6	1.49565	1.77391	1.62319	0.87931	0.695402	0.724138	0.766284	1.1999	1.09641	1.10597	1.13409	0.956739	0.953808	1.11665	1.00906	1.67852	0.68045	0.943845	1.10094	1.12981	0.802833	1.09613	1.00959
Rabeprazole		1.79	1.47	0.393	1.21767	1.392	1.112	0.941	1.14833	1.27127	1.23603	1.49467	1.33399	1.018	1.01	0.973	1.00033	1.18384	1.12446	0.731973	1.01343	0.652975	0.518287	0.765457	0.645573	2.05217	1.6	0.278261	1.31014	0.942529	0.597701	0.747126	0.762452	1.07706	1.08028	1.15101	1.10278	1.03371	0.943386	0.997775	0.991623	0.334418	1.85287	7.25642	3.1479	1.11822	0.805523	1.6306	1.18478
Nisoldipine		1.154	1.344	1.645	1.381	0.805	0.641	0.668	0.704667	0.976393	1.23621	1.42307	1.21189	0.968	0.965	0.931	0.954667	0.809146	0.548006	0.862544	0.739899	0.523222	0.959507	0.787373	0.756701	0.904348	0.713043	1.37391	0.997101	0.436782	0.637931	0.545977	0.54023	1.08822	1.203	1.09617	1.12913	0.877164	0.914183	0.922434	0.904594	0.985449	1.07764	0.404737	0.822608	0.531878	1.14991	0.891307	0.857697
Calcipotriol		1.394	1.629	1.497	1.50667	1.099	1.22	1.098	1.139	1.29009	1.45665	1.27127	1.33933	1.022	1.017	1.027	1.022	0.515526	0.253605	0.467845	0.412325	0.655152	0.381567	1.35747	0.798065	0.695652	0.4	0.678261	0.591304	0.747126	0.482759	1.54598	0.925287	1.1149	0.830996	0.854448	0.933449	0.855887	0.805732	0.836997	0.832872	0.509684	1.604	1.19558	1.10309	1.59312	0.818567	2.21958	1.54376
Rolitetracycline		2.238	2.117	1.767	2.04067	1.053	1.104	1.201	1.11933	1.78124	1.76039	1.78025	1.77396	1.068	1.072	1.075	1.07167	0.216708	0.339483	0.274523	0.276904	0.199855	0.165602	0.507692	0.29105	0.469565	0.695652	0.469565	0.544928	0.218391	0.189655	0.632184	0.346743	1.40526	0.944162	1.01427	1.12123	1.13771	0.736036	0.734734	0.869493	0.551341	0.829369	0.772407	0.717706	0.261406	0.395749	0.248584	0.301913
Vardenafil citrate		1.616	1.695	1.463	1.59133	1.336	1.139	1.16	1.21167	1.38332	1.33184	1.30981	1.34166	1.033	1.032	1.031	1.032	0.93361	0.974925	1.01923	0.975921	0.551524	0.510885	0.726125	0.596178	1.46087	1.6	1.44348	1.50145	0.764368	0.603448	0.873563	0.747126	1.10187	1.03115	1.08177	1.0716	0.906584	0.895402	0.895511	0.899166	0.137426	1.53563	0.747495	0.806851	0.436772	0.535527	0.861587	0.611295
2-Chloroadenosine		1.175	1.149	1.371	1.23167	1.413	1.285	1.369	1.35567	1.27095	1.15677	1.11394	1.18055	1.029	1.019	1.011	1.01967	0.794855	0.719111	0.798883	0.77095	0.749057	0.71553	0.724238	0.729608	0.904348	0.8	1.06087	0.921739	1.0977	0.954023	1.02874	1.02682	1.11478	0.931629	0.849857	0.965422	0.990392	0.972263	0.966184	0.97628	0.532168	0.570837	0.801024	0.634676	0.457112	0.903028	0.69327	0.68447
Milnacipran hydrochloride		1.076	1.163	1.394	1.211	1.304	1.29	1.11	1.23467	0.958447	1.03086	1.21658	1.06863	1.004	1.023	0.997	1.008	1.06873	0.849682	0.979602	0.966004	0.718287	0.901742	0.783599	0.801209	1.11304	0.956522	1.32174	1.13043	0.971264	1.2069	0.902299	1.02682	1.16578	0.978285	1.06006	1.06804	0.928079	0.948054	1.03327	0.969802	0.671682	1.80768	0.188836	0.889399	0.486892	0.800864	0.657903	0.648553
Tacrine hydrochloride	87	1.23	1.637	1.416	1.42767	0.974	0.958	1.173	1.035	1.18102	1.35711	1.13604	1.22472	0.978	0.996	1.001	0.991667	0.780293	0.808203	0.915929	0.834808	0.953124	1.03212	0.791279	0.925507	0.961039	1.32468	1.2987	1.19481	0.919403	0.979104	0.919403	0.939303	1.03125	1.11014	0.922168	1.02118	0.913968	0.888671	0.956166	0.919602	0.324186	0.647704	0.338644	0.436845	0.711874	0.424609	0.527596	0.554693
Amiloride hydrochloride hydrate		1.706	1.375	1.761	1.614	1.221	1.073	0.922	1.072	1.35655	1.00767	1.26394	1.20939	1.012	1.008	0.99	1.00333	1.39925	1.41508	0.766167	1.1935	1.12067	1.34809	1.35296	1.27391	2.38961	1.94805	1.35065	1.8961	1.35522	1.43284	1.23582	1.34129	1.08169	1.01346	0.925796	1.00698	0.898375	1.02115	0.98757	0.969033	0.949504	1.64481	0.838056	1.14412	0.689262	0.541944	0.68831	0.639838
Moxifloxacin hydrochloride		2.23	2.285	2.267	2.26067	0.866	1.045	1.066	0.992333	1.46023	1.51356	1.4351	1.46963	0.989	0.989	0.997	0.991667	0.441967	0.681246	0.572158	0.565124	0.800671	0.773333	0.83153	0.801845	0.987013	1.55844	1.2987	1.28139	0.686567	0.8	0.877612	0.78806	1.00257	1.00632	1.10651	1.03847	1.12987	0.950823	0.885618	0.988769	1.22677	1.261	0.187842	0.891871	1.42675	1.62633	1.31557	1.45622
Roxatidine acetate hydrochloride		2.238	1.799	1.57	1.869	1.096	0.979	1.064	1.04633	1.55661	1.2943	1.30676	1.38589	1.017	1	1.007	1.008	0.521613	0.605684	0.627808	0.585035	1.02306	1.02273	0.83891	0.961565	1.16883	1.09091	0.987013	1.08225	1.11045	0.991045	0.883582	0.995025	1.05232	1.08251	1.03207	1.05563	0.87177	0.810381	0.845055	0.842402	2.19847	0.383935	1.89139	1.49127	1.18484	1.12136	1.48293	1.26305
Formoterol fumarate dihydrate		1.061	1.655	1.652	1.456	1.279	1.287	1.042	1.20267	1.22242	1.47911	1.30385	1.33513	1.025	1.017	0.993	1.01167	1.61385	1.14398	1.19316	1.317	0.725702	0.786751	0.994717	0.835723	1.71429	1.8961	1.97403	1.86147	0.919403	1.00299	1.02687	0.983085	0.962313	1.13928	0.96992	1.02384	0.825537	0.924763	0.881256	0.877185	1.04523	0.450187	1.03631	0.84391	0.454316	0.424004	0.518906	0.465742
Venlafaxine hydrochloride		1.569	1.564	2.145	1.75933	1.053	1.15	0.954	1.05233	1.42322	1.19176	1.43905	1.35134	0.988	1.001	0.974	0.987667	1.3065	1.42648	0.919333	1.21744	1.04788	0.786415	0.954633	0.929644	2.05195	2.23377	1.97403	2.08658	1.09254	0.895522	0.901493	0.963184	0.993212	0.965239	0.992626	0.983692	0.881365	0.926071	0.949079	0.918838	1.07372	0.830453	0.817539	0.907236	0.730133	0.573111	0.410474	0.57124
Huperzine A		2.101	2.221	2.236	2.186	1.036	0.996	1.008	1.01333	1.38668	1.49814	1.44517	1.44333	0.995	0.986	0.98	0.987	0.81518	0.852621	0.614874	0.760892	0.66348	0.901803	0.71195	0.759078	1.71429	1.8961	1.37662	1.66234	0.680597	0.889552	0.710448	0.760199	0.885885	0.878394	0.95529	0.906523	1.04809	0.93752	0.955185	0.980264	1.13872	1.34006	0.738646	1.07248	1.46536	1.46115	1.17795	1.36815
Granisetron hydrochloride		2.107	2.041	1.502	1.88333	1.133	1.075	1.257	1.155	1.40788	1.3281	1.18472	1.3069	0.992	0.991	1.006	0.996333	0.714261	0.64823	1.03659	0.799694	0.792788	0.785241	0.906499	0.828176	1.50649	1.32468	1.55844	1.4632	0.889552	0.835821	1.12836	0.951244	1.06765	1.04553	1.03441	1.0492	0.963036	0.884854	0.923345	0.923745	1.32799	0.83822	0.949669	1.03863	0.862653	0.690637	0.713388	0.755559
Nifekalant hydrochloride		1.04	1.636	1.149	1.275	1.429	1.215	1.095	1.24633	0.756685	1.13523	1.0544	0.982103	1.028	1.007	0.992	1.009	1.22277	1.68125	1.42189	1.44197	0.620042	0.957987	0.847631	0.808553	1.27273	2.75325	1.63636	1.88745	0.877612	1.15224	0.919403	0.983085	0.918539	0.994616	0.940309	0.951155	0.996838	0.932832	0.938938	0.956203	0.703624	0.419863	0.67429	0.599259	0.664574	0.64974	0.424638	0.579651
Escitalopram oxalate		1.041	1.053	1.139	1.07767	0.796	0.788	0.916	0.833333	1.12658	0.804037	0.834002	0.921539	0.966	0.957	0.988	0.970333	1.9435	1.25613	1.18465	1.46143	1.14331	1.22482	0.92847	1.09887	2.02597	1.32468	1.35065	1.5671	0.901493	0.955224	0.841791	0.899502	1.0838	0.799391	0.801615	0.894936	0.860212	0.838186	0.94777	0.882056	0.81729	0.478299	0.837624	0.711071	0.54604	0.394785	0.411596	0.450807
Fenoldopam mesylate		1.877	1.485	1.864	1.742	1.215	1.011	1.162	1.12933	1.31243	1.05014	1.29632	1.21963	1.023	0.982	1.015	1.00667	0.622192	0.961028	1.11317	0.898797	0.332579	0.459036	0.461887	0.417834	1.16883	1.42857	2.07792	1.55844	0.4	0.459701	0.531343	0.463682	1.0783	0.943001	0.912219	0.97784	0.911787	0.938502	0.875695	0.908661	1.06908	1.14916	1.35818	1.19214	0.77352	1.21567	0.881454	0.956881
Ticlopidine hydrochloride		2.046	1.814	1.25	1.70333	1.133	1.043	1.162	1.11267	1.38229	1.20919	1.02055	1.20401	0.994	0.973	0.983	0.983333	0.913036	1.38717	1.30752	1.20258	0.750189	0.745828	0.705577	0.733864	1.87013	2.51948	1.63636	2.00866	0.841791	0.770149	0.81194	0.80796	1.11072	1.10054	1.11154	1.1076	0.975466	0.825646	0.866318	0.889143	0.830664	0.770261	0.569137	0.723354	0.466443	0.474756	0.380063	0.440421
Cefatrizine propylene glycol		1.212	1.509	1.267	1.32933	1.205	1.225	1.092	1.174	1.11698	1.37833	1.26722	1.25418	0.982	0.993	0.973	0.982667	1.09173	1.42682	1.59735	1.37197	0.670524	0.674046	0.87195	0.73884	1.32468	2.15584	2.02597	1.8355	0.8	0.81791	0.943284	0.853731	1.01873	1.11493	1.03394	1.05587	0.91146	0.910261	0.998692	0.940137	0.461462	1.17239	0.832742	0.822199	0.704935	0.503698	0.77667	0.661768
Mosapride citrate		1.82	1.758	1.93	1.836	1.328	1.281	1.213	1.274	1.43099	1.42541	1.39551	1.4173	1.005	1.004	1.004	1.00433	1.53931	1.63836	1.25017	1.47595	0.662977	1.06348	0.780377	0.835611	2.80519	2.88312	2.41558	2.7013	0.871642	1.34925	0.937313	1.05274	0.963951	0.940075	1.03137	0.978464	0.994439	0.962381	0.936539	0.964453	1.51927	1.47369	1.43426	1.47574	0.824829	1.2143	0.990786	1.00997
Moxonidine hydrochloride		2.302	2.041	2.415	2.25267	1.062	1.075	1.04	1.059	1.47327	1.47741	1.36776	1.43948	0.998	1.004	0.999	1.00033	0.845303	0.724472	0.902485	0.824087	0.868595	1.04302	0.898281	0.936632	1.94805	1.48052	2.18182	1.87013	0.913433	1.11045	0.925373	0.983085	1.04331	0.928488	1.08755	1.01978	0.93534	0.891615	0.927816	0.918257	1.07803	1.38563	1.75104	1.4049	2.31712	1.76608	1.18556	1.75625
Esomeprazole magnesium		2.355	1.995	1.346	1.89867	1.01	1.087	1.145	1.08067	1.45495	1.24488	1.13467	1.27817	0.976	0.988	0.994	0.986	0.760041	1.07914	1.19503	1.0114	0.757736	0.676562	0.742306	0.725535	1.79221	2.15584	1.61039	1.85281	0.758209	0.728358	0.841791	0.776119	1.00527	0.95611	1.04693	1.00277	0.941773	0.881801	0.946026	0.9232	0.586438	1.37811	1.3827	1.11575	1.17923	0.841234	0.567669	0.86271
Ketotifen fumarate		1.07	1.361	1.168	1.19967	1.117	0.931	0.963	1.00367	0.827865	1.29116	1.19569	1.1049	0.992	0.971	0.982	0.981667	1.55157	1.37219	1.59956	1.50777	0.836897	0.873795	0.889224	0.866639	1.66234	1.87013	1.87013	1.80087	0.925373	0.80597	0.847761	0.859701	1.09375	1.09305	1.10218	1.09632	0.969796	0.907971	0.930869	0.936212	0.521976	0.431707	0.817443	0.590375	0.335284	0.360292	0.333567	0.343048
Anagrelide hydrochloride		1.977	1.947	2.227	2.05033	0.961	0.836	0.951	0.916	1.44279	1.33614	1.45904	1.41266	0.997	0.979	0.995	0.990333	2.4275	0.839517	1.18822	1.48508	2.11455	3.25199	3.11212	2.82622	4.80519	1.63636	2.64935	3.0303	2.01194	2.69254	2.93134	2.54527	0.825492	1.02985	0.948853	0.93473	0.838077	0.862392	0.892814	0.864428	1.76001	1.31008	0.708186	1.25943	1.03087	0.838077	0.841532	0.903493
Indirubin		1.889	2.139	2.091	2.03967	0.931	0.792	1.137	0.953333	1.42215	1.52932	1.50286	1.48478	1.03	1.007	1.006	1.01433	1.29118	0.8613	1.14125	1.09791	1.58642	1.60637	0.997233	1.39667	2.44156	1.84416	2.38961	2.22511	1.46269	1.2597	1.12239	1.28159	1.07233	1.11692	0.990403	1.05989	0.960528	1.00436	0.898048	0.954313	2.14596	1.89765	1.49005	1.84455	2.54483	1.54072	1.16646	1.75067
Ranolazine dihydrochloride		1.834	2.067	1.555	1.81867	1.196	1.104	1.087	1.129	1.28695	1.24116	1.17825	1.23545	1.016	0.988	0.995	0.999667	1.08935	1.2049	0.967665	1.0873	0.912704	0.830356	0.810063	0.851041	2	2.49351	1.50649	2	1.0806	0.907463	0.871642	0.953234	1.09434	1.03476	0.902973	1.01069	0.963363	1.00872	0.888017	0.953367	0.830192	0.726253	0.801202	0.785882	0.711147	0.68823	0.69315	0.697509
Sertraline hydrochloride		0.063	0.133	0.101	0.099	0.13	0.127	0.231	0.162667	-2.5514	-0.534405	0.281766	-0.934681	0.882	0.917	0.941	0.913333	0	0.195541	0.257828	0.151123	0.0925786	0.0947589	0.0783229	0.0885535	0	0.025974	0.025974	0.017316	0.0119403	0.0119403	0.0179104	0.0139303	0	0.522472	0.815777	0.446083	0.605605	0.415658	0.448806	0.490023	0.00416465	0.00373824	0.00391681	0.0039399	0.00766585	0.00028204	0.000233115	0.002727
Terbinafine hydrochloride		1.002	1.285	1.442	1.243	0.727	0.844	0.885	0.818667	1.02962	1.14989	1.22128	1.1336	0.915	0.958	0.969	0.947333	0.699455	0.383594	0.521784	0.534944	0.763438	0.742474	0.694843	0.733585	0.701299	0.493506	0.753247	0.649351	0.549254	0.620896	0.608955	0.593035	1.04354	1.12512	1.03558	1.06808	0.781267	0.860212	0.871443	0.83764	0.345718	0.454981	0.64213	0.480943	0.423536	0.388403	0.386861	0.3996
Nelfinavir mesylate		0.587	0.515	0.445	0.515667	0.278	0.248	0.23	0.252	1.07476	1.0729	1.01902	1.05556	0.935	0.88	0.861	0.892	0.530463	0.654527	0.524506	0.569832	1.14851	0.949266	1.46751	1.18843	0.311688	0.337662	0.233766	0.294372	0.316418	0.232836	0.334328	0.294527	0.881086	0.651685	1.1092	0.880657	0.818995	0.922364	0.817904	0.853088	0.281045	0.453727	0.492017	0.40893	2.74704	2.20579	1.10202	2.01828
Itopride hydrochloride		2.165	2.061	1.422	1.88267	0.929	1.091	1.043	1.021	1.42587	1.41162	1.02901	1.28884	1.001	1.018	1.004	1.00767	0.791014	1.09513	1.03965	0.975267	1.35698	1.2327	0.982474	1.19072	1.71429	2.25974	1.48052	1.81818	1.24776	1.33134	1.01493	1.19801	1.10791	1.02341	1.0474	1.05957	0.902083	0.928034	0.850834	0.89365	0.821618	1.21495	0.769738	0.935436	0.84821	0.789253	0.869898	0.835787
					#DIV/0!	#N/A	#N/A	#N/A	#N/A				#DIV/0!	#N/A	#N/A	#N/A	#N/A				#DIV/0!	#N/A	#N/A	#N/A	#N/A				#DIV/0!	#N/A	#N/A	#N/A	#N/A				#DIV/0!	#N/A	#N/A	#N/A	#N/A				#DIV/0!	#N/A	#N/A	#N/A	#N/A
					#DIV/0!	#N/A	#N/A	#N/A	#N/A				#DIV/0!	#N/A	#N/A	#N/A	#N/A				#DIV/0!	#N/A	#N/A	#N/A	#N/A				#DIV/0!	#N/A	#N/A	#N/A	#N/A				#DIV/0!	#N/A	#N/A	#N/A	#N/A				#DIV/0!	#N/A	#N/A	#N/A	#N/A
					#DIV/0!	#N/A	#N/A	#N/A	#N/A				#DIV/0!	#N/A	#N/A	#N/A	#N/A				#DIV/0!	#N/A	#N/A	#N/A	#N/A				#DIV/0!	#N/A	#N/A	#N/A	#N/A				#DIV/0!	#N/A	#N/A	#N/A	#N/A				#DIV/0!	#N/A	#N/A	#N/A	#N/A
					#DIV/0!	#N/A	#N/A	#N/A	#N/A				#DIV/0!	#N/A	#N/A	#N/A	#N/A				#DIV/0!	#N/A	#N/A	#N/A	#N/A				#DIV/0!	#N/A	#N/A	#N/A	#N/A				#DIV/0!	#N/A	#N/A	#N/A	#N/A				#DIV/0!	#N/A	#N/A	#N/A	#N/A
Epirubicin hydrochloride	97	0.039	0.048	0.048	0.045	0.021	0.028	0.029	0.026	-3.97649	-2.53271	-3.48894	-3.33271	-1.491	-1.371	-1.346	-1.40267	0.973055	2.81113	2.40961	2.0646	2.51996	2.78711	1.62001	2.30903	0.0392157	0.137255	0.117647	0.0980392	0.0611354	0.0873362	0.0524017	0.0669578	0.535633	0.61993	0.588365	0.58131	0.400137	0.443086	0.424106	0.422443	0.00130782	0.000604024	0.000234943	0.000715596	0.000668823	0.000303448	0.00119645	0.000722907
Indatraline hydrochloride		0.041	0.075	0.047	0.0543333	0.027	0.026	0.023	0.0253333	0.391965	0.361812	0.262607	0.338795	0.568	0.531	0.624	0.574333	0	0.255534	0	0.0851782	0	0.292898	0	0.0976326	0	0.0196078	0	0.00653595	0	0.00873362	0	0.00291121	0	0.563406	0	0.187802	0	0.926381	0	0.308794	0.00183365	0.000960202	0.000906037	0.00123329	0.000406699	0.000780294	0.0009475	0.000711497
Haloperidol hydrochloride		1.212	1.187	1.33	1.243	0.857	1.001	0.929	0.929	1.21424	1.16282	1.22694	1.20133	0.971	1	0.982	0.984333	2.10702	2.23251	1.55876	1.9661	0.622257	0.671505	0.706757	0.666839	2.60784	2.70588	2.11765	2.47712	0.60262	0.759825	0.742358	0.701601	0.831957	0.778859	0.750474	0.787097	0.859267	0.723866	0.90114	0.828091	2.01823	3.8723	1.912	2.60084	0.661089	0.574781	0.896396	0.710755
Picrotin - Picrotoxinin		1.32	1.425	1.171	1.30533	0.953	1.016	1.152	1.04033	1.12101	1.10105	1.06363	1.09523	0.99	0.996	0.99	0.992	0.799747	0.619608	0.770651	0.730002	1.6048	1.14135	1.02004	1.2554	1.07843	0.901961	0.921569	0.96732	1.72926	1.31004	1.32751	1.4556	0.906099	0.922371	0.998838	0.942436	0.783642	0.755662	0.963753	0.834352	0.164785	0.217604	0.18811	0.190166	1.81617	1.75063	1.13306	1.56662
Fluperlapine		1.105	0.846	1.041	0.997333	0.805	0.87	0.88	0.851667	0.973987	0.795833	0.90308	0.890966	0.986	0.981	0.983	0.983333	1.11221	1.63365	1.03276	1.25954	0.834802	1.04787	0.737515	0.873394	1.2549	1.41176	1.09804	1.2549	0.759825	1.03057	0.733624	0.841339	0.977549	0.830611	0.784242	0.864134	0.921	0.956318	0.833439	0.903586	0.168381	0.383793	0.066734	0.206303	0.50654	0.674102	0.551003	0.577215
Pizotyline maleate		0.234	0.176	0.081	0.163667	0.069	0.096	0.08	0.0816667	0.533909	0.568459	0.228253	0.44354	0.646	0.598	0.746	0.663333	0.410626	0.21809	0.472865	0.367194	0.336617	0.482288	0.288059	0.368988	0.0980392	0.0392157	0.0392157	0.0588235	0.0262009	0.0524017	0.0262009	0.0349345	1.35866	0.607818	0.616382	0.860953	0.379201	0.369222	0.436824	0.395082	0.00183551	0.0178805	#DIV/0!	#DIV/0!	0.0237363	0.0490429	0.017996	0.0302584
Clonidine hydrochloride		1.162	1.3	1.288	1.25	0.978	1.128	1.031	1.04567	1.17832	1.19	1.18874	1.18569	0.989	1.011	0.954	0.984667	1.68552	2.02353	1.19266	1.6339	1.56368	1.13686	1.40937	1.36997	2	2.68627	1.56863	2.08497	1.72926	1.44978	1.64192	1.60699	0.941579	0.938888	0.889582	0.92335	0.864159	0.848799	0.871007	0.861322	2.12528	2.7377	1.83203	2.23167	2.41885	1.24771	1.54304	1.73654
Physostigmine hemisulfate		1.306	1.187	1.178	1.22367	1.08	1.084	1.121	1.095	1.03405	0.891585	1.04211	0.989248	0.964	1.001	1.02	0.995	0.779254	0.937634	1.09146	0.936116	1.11664	1.21237	0.972179	1.1004	1.03922	1.13725	1.31373	1.1634	1.36245	1.48472	1.23144	1.35953	0.995167	0.892886	0.964214	0.950755	0.973243	1.02627	0.89253	0.964014	0.0633586	0.12125	0.115113	0.0999073	1.01251	1.39092	0.780483	1.0613
Otenzepad		1.37	1	1.238	1.20267	1.074	0.999	0.978	1.017	1.00126	0.859787	0.886456	0.915834	0.991	0.999	0.972	0.987333	0.770904	0.921442	0.977356	0.889901	0.762917	0.88958	0.853292	0.835263	1.07843	0.941176	1.23529	1.08497	0.925764	1.00437	0.943231	0.957787	0.944026	0.886768	0.900593	0.910463	1.02852	0.986254	0.989287	1.00135	0.183335	0.259305	0.122328	0.188323	0.597971	0.463208	0.255056	0.438745
Ipidacrine		1.062	1.047	1.273	1.12733	1.208	1.37	1.271	1.283	0.887352	0.976901	1.02076	0.961672	1.022	1.04	1.022	1.028	0.813156	0.953321	0.512587	0.759688	0.831692	0.863142	0.851218	0.848684	0.882353	1.01961	0.666667	0.856209	1.13537	1.33624	1.22271	1.23144	0.954915	1.06625	0.851043	0.957403	0.990853	0.929707	0.980874	0.967144	0.147343	0.194165	0.314514	0.218674	0.506629	0.407328	0.662967	0.525641
Ketoconazole		1.326	1.317	1.427	1.35667	0.944	0.927	0.982	0.951	1.2386	1.1039	1.19081	1.17777	0.97	0.936	0.991	0.965667	1.1876	1.09298	1.31891	1.19983	1.85899	2.30897	2.1315	2.09982	1.60784	1.47059	1.92157	1.66667	1.98253	2.41921	2.36681	2.25619	0.858139	0.973023	0.734814	0.855325	0.679352	0.823363	0.752042	0.751586	2.28877	2.17429	2.84507	2.43605	3.25274	3.60137	3.59616	3.48342
Beta-estradiol		1.207	1.26	0.797	1.088	0.632	0.799	0.676	0.702333	0.977308	1.10343	0.851304	0.977346	0.903	0.948	0.966	0.939	0.826818	1.43276	1.80721	1.3556	2.34647	1.65353	1.61258	1.87086	1.01961	1.84314	1.47059	1.44444	1.67686	1.49345	1.23144	1.46725	0.875757	1.07298	0.981464	0.976734	0.963459	1.03683	0.894976	0.96509	0.247369	1.30463	0.219105	0.590367	0.904607	0.96651	1.14562	1.00558
AM 404		0.219	0.251	0.209	0.226333	0.017	0.027	0.065	0.0363333	0.78017	1.1166	1.20781	1.03486	-0.06	0	0.579	0.173	0.0877925	0.0764073	0.0920936	0.0854312	0	0	0.119233	0.0397443	0.0196078	0.0196078	0.0196078	0.0196078	0	0	0.00873362	0.00291121	0.510308	1.02147	0.405334	0.645705	0	0	0.513721	0.17124	0.000396875	0.000617752	0.000207907	0.000407511	0.00043806	0.000281187	0.000212553	0.0003106
Loratadine		0.338	0.425	0.261	0.341333	0.271	0.287	0.417	0.325	0.481873	0.67162	0.752556	0.635349	0.895	0.897	0.904	0.898667	0.567236	0.632511	0.882479	0.694075	1.79644	0.861241	1.55746	1.40505	0.196078	0.27451	0.235294	0.235294	0.550218	0.279476	0.733624	0.521106	1.03701	0.913562	0.861932	0.937501	0.86093	0.765641	0.93137	0.852647	0.220629	0.359675	0.405407	0.32857	1.21357	0.992794	1.6819	1.29609
Fluticasone propionate		1.241	1.31	1.261	1.27067	0.921	0.903	0.948	0.924	1.06189	1.18952	1.12562	1.12568	0.935	0.936	0.92	0.930333	11.0419	5.86338	6.31752	7.74092	5.18663	4.15103	4.7624	4.70002	14	7.84314	8.13725	9.99346	5.39738	4.23581	5.10044	4.91121	0.658347	0.765033	0.728574	0.717318	0.652448	0.630729	0.636991	0.640056	1.12098	2.69312	3.79984	2.53798	1.91856	1.96928	1.93155	1.9398
Urapidil hydrochloride		1.381	1.227	0.947	1.185	1.144	1.133	1.116	1.131	1.07889	0.952527	0.845394	0.958937	0.971	0.983	0.997	0.983667	0.583934	0.985705	1.62176	1.0638	0.98583	1.22792	0.997408	1.07039	0.823529	1.23529	1.56863	1.20915	1.27511	1.57205	1.25764	1.36827	0.926041	1.07738	0.919435	0.974287	0.962383	1.01003	1.04192	1.00478	0.203148	0.230581	0.268917	0.234215	0.710874	0.905274	1.17278	0.929642
Ozagrel hydrochloride		1.35	1.147	1.119	1.20533	1.182	1.164	1.201	1.18233	0.975615	0.850702	0.893002	0.906439	1.025	1.028	0.996	1.01633	1.26578	1.22151	1.01202	1.16643	0.706065	0.790047	0.913599	0.803237	1.7451	1.43137	1.15686	1.44444	0.943231	1.0393	1.24017	1.07424	1.05634	1.02404	0.978528	1.01964	1.05484	1.06922	1.04456	1.05621	0.518514	0.22838	0.0499463	0.265614	0.654968	0.659237	0.503876	0.606027
Selegiline hydrochloride		1.159	1.082	1.103	1.11467	1.213	1.478	1.335	1.342	0.960066	0.940821	0.971968	0.957618	1.01	1.04	1.013	1.021	1.15901	0.851613	1.02669	1.01244	0.923968	0.67427	0.862278	0.820172	1.37255	0.941176	1.15686	1.15686	1.26638	1.12664	1.30131	1.23144	0.899125	0.902429	1.03909	0.946881	0.96659	0.941545	1.00279	0.970308	0.0944267	0.202145	0.282374	0.192982	0.624922	0.463008	0.738129	0.608686
Nafadotride		1.167	1.225	1.094	1.162	1.036	0.942	1.065	1.01433	1.07239	1.08646	1.03538	1.06475	0.991	0.971	0.981	0.981	0.460721	1.08159	1.35104	0.964453	1.20079	1.39416	0.943494	1.17948	0.54902	1.35294	1.5098	1.13725	1.40611	1.48472	1.13537	1.34207	1.0397	0.935707	0.944883	0.97343	0.781099	0.941153	0.81759	0.846614	0.0488822	0.153613	0.20082	0.134439	0.842161	0.856813	0.976843	0.891939
Trifluoperazine hydrochloride		0.061	0.158	0.069	0.096	0.048	0.035	0.009	0.0306667	0.462318	0.908013	0.769359	0.71323	0.632	0.574	0.671	0.625667	0.31246	0.608223	0.278052	0.399578	0.640055	0.221531	0.864006	0.575197	0.0196078	0.0980392	0.0196078	0.0457516	0.0349345	0.00873362	0.00873362	0.0174672	0.529027	0.847373	0.419527	0.598642	0.396615	0.418334	0.335078	0.383342	0.00053865	0.000432658	0.000573823	0.000515044	0.000359642	0.000417733	0.000381916	0.00038643
Prazosin hydrochloride hydrate		0.599	0.496	0.518	0.537667	0.266	0.283	0.318	0.289	0.71812	0.597489	0.69132	0.668976	0.902	0.852	0.849	0.867667	0.769639	0.773688	1.07426	0.872528	1.36496	1.03733	0.851909	1.08473	0.470588	0.392157	0.568627	0.477124	0.41048	0.331878	0.305677	0.349345	0.818744	1.08375	1.39634	1.09961	0.900944	0.87042	0.792447	0.854604	0.151992	0.365465	0.362896	0.293451	0.793182	0.906466	0.192918	0.630855
5-Fluoro-2-pyrimidone		1.305	1.233	1.27	1.26933	1.033	1.079	1.386	1.166	0.994892	0.976901	1.04071	1.00417	1.012	1.017	1.037	1.022	0.676534	1.1833	0.8463	0.902045	1.03231	0.967168	1.09297	1.03082	0.901961	1.4902	1.09804	1.1634	1.20524	1.17904	1.71179	1.36536	0.920414	1.12131	1.16719	1.06964	1.0295	1.07225	0.933327	1.01169	0.39649	0.243961	0.464875	0.368442	0.529287	0.510167	0.651567	0.563673
Doxorubicin hydrochloride		0.104	0.117	0.291	0.170667	0.092	0.115	0.118	0.108333	-1.6876	-1.62817	0.909739	-0.802009	-0.386	0.178	-0.264	-0.157333	1.66199	0.985705	0.264137	0.970609	1.17436	0.53793	1.44548	1.05259	0.176471	0.117647	0.0784314	0.124183	0.122271	0.069869	0.19214	0.128093	0.465651	0.440081	0.455252	0.453661	0.447097	0.375874	0.440053	0.421008	0.000227811	0.000305608	0.000448937	0.000327452	0.00165757	0.000731219	0.00027289	0.000887227
Indinavir sulfate		1.365	1.065	1.411	1.28033	1.355	1.071	1.173	1.19967	1.07972	0.998019	1.07552	1.05109	1.015	0.99	1.033	1.01267	1.16736	1.62302	1.14333	1.31124	0.99257	1.23432	1.24469	1.15719	1.62745	1.76471	1.64706	1.67974	1.51965	1.49345	1.65066	1.55459	0.945372	0.958586	0.953569	0.952509	0.952991	1.09876	0.988602	1.01345	0.200467	0.440016	0.559672	0.400052	0.922186	0.837226	0.557146	0.772186
Alosetron monohydrochloride		1.097	1.166	1.09	1.11767	1.154	1.177	1.143	1.158	0.917668	0.977748	0.932485	0.942634	1.007	1.008	1.003	1.006	1.06743	0.823023	0.79241	0.894286	0.74339	0.985139	1.2986	1.00904	1.19608	0.980392	0.882353	1.01961	0.969432	1.31004	1.67686	1.31878	1.04998	0.98073	0.905854	0.978854	0.982145	0.945556	0.977743	0.968481	0.236117	0.174082	0.185175	0.198458	0.546152	0.729645	0.609707	0.628501
Bifemelane hydrochloride		0.118	0.132	0.083	0.111	0.125	0.102	0.076	0.101	0.563591	0.786015	0.695668	0.681758	0.858	0.796	0.788	0.814	1.29741	0.43618	0.229981	0.654522	0.743218	0.377225	0.306722	0.475721	0.156863	0.0588235	0.0196078	0.0784314	0.104803	0.0436681	0.0262009	0.0582242	0.887258	0.625925	0.477029	0.663404	0.818177	0.889987	2.39026	1.36614	0.0284667	0.0394923	0.00542678	0.0244619	0.0506044	0.0808355	0.0265372	0.052659
TFMPP hydrochloride		1.072	0.904	0.986	0.987333	1.326	1.146	1.091	1.18767	0.996716	0.951469	0.933787	0.960657	1.034	1.009	1.02	1.021	0.787856	0.849842	1.05174	0.896479	1.12442	1.26076	1.29653	1.22723	0.862745	0.784314	1.05882	0.901961	1.68559	1.63319	1.59825	1.63901	1.08338	1.01425	1.05304	1.05022	0.921391	0.909064	0.983124	0.93786	0.185141	0.25093	0.153451	0.196508	0.979992	0.955018	1.12122	1.01874
Imatinib mesylate		0.549	0.549	0.593	0.563667	0.508	0.629	0.477	0.538	0.806204	0.869263	0.845313	0.84026	0.922	0.978	1.028	0.976	0.594813	0.874889	0.93814	0.802614	0.867116	0.79886	0.680836	0.782271	0.333333	0.490196	0.568627	0.464052	0.497817	0.567686	0.366812	0.477438	0.874901	0.754512	1.04986	0.893089	0.864257	0.844103	0.894389	0.867583	0.462141	0.439128	0.176715	0.359328	0.552541	0.632639	0.644739	0.609973
Cinanserin	98	1.121	1.033	1.147	1.10033	1.077	1.063	1.229	1.123	1.01718	0.976598	0.960116	0.984632	0.991	0.966	1.004	0.987	0.970618	1.16165	0.887838	1.0067	0.694698	0.66038	0.516772	0.62395	1.07586	1.18621	1.0069	1.08966	0.706625	0.662461	0.599369	0.656151	1.15674	1.03624	0.959543	1.05084	0.813038	0.946397	0.860632	0.873355	1.14413	1.02078	0.38331	0.849406	0.410988	0.31279	0.446573	0.390117
Cetraxate hydrochloride		1.033	1.202	1.136	1.12367	1.185	1.178	1.224	1.19567	1.06033	1.06907	1.06964	1.06635	1.006	1.015	1.018	1.013	1.13363	0.731011	0.896207	0.920283	1.16788	1.08919	0.955171	1.07075	1.15862	0.868966	1.0069	1.01149	1.30599	1.21136	1.1041	1.20715	1.07744	1.04617	1.06031	1.06131	1.04908	0.999279	0.990722	1.01303	0.361663	0.577084	0.580639	0.506462	0.797489	0.616167	1.05946	0.824371
Fluvoxamine maleate		1.057	0.961	0.762	0.926667	0.715	0.768	0.731	0.738	1.11906	0.951235	0.770082	0.946792	0.965	0.964	0.929	0.952667	0.686073	0.884927	1.17147	0.914157	0.990725	1.17437	0.90555	1.02355	0.717241	0.841379	0.882759	0.813793	0.66877	0.851735	0.624606	0.715037	1.08141	0.968975	0.839414	0.963266	0.768809	0.796308	0.873227	0.812781	2.68638	2.0932	1.5555	2.11169	1.92293	1.29261	0.816952	1.34416
Salbutamol sulfate		1.282	1.317	1.059	1.21933	1.164	1.066	0.935	1.055	1.16076	1.17455	1.10983	1.14838	1.021	1.001	0.984	1.002	1.17511	1.0272	1.04066	1.08099	0.769825	1.05982	0.922399	0.917349	1.48966	1.33793	1.08966	1.30575	0.845426	1.06625	0.81388	0.908517	1.06925	0.967982	0.883966	0.973732	1.07581	1.07245	0.987068	1.04511	0.991368	0.580953	0.671558	0.74796	0.647024	1.22444	1.14383	1.0051
L-NMMA acetate		1.025	1.072	1.25	1.11567	1.017	1.069	0.975	1.02033	1.14111	1.07879	1.08213	1.10068	0.999	0.982	0.989	0.99	1.40162	1.10616	1.17202	1.2266	0.940331	1.13186	1.1654	1.0792	1.42069	1.17241	1.44828	1.34713	0.902208	1.14196	1.07256	1.03891	0.863117	0.893026	0.964631	0.906925	1.0437	0.998702	1.00428	1.01556	0.722427	1.0705	0.468001	0.753644	2.05147	0.586972	0.470801	1.03642
Progesterone		1.19	1.151	0.982	1.10767	1.013	1.209	0.998	1.07333	1.1121	1.0526	0.992713	1.05247	0.957	1.011	0.942	0.97	0.691167	0.72719	0.923133	0.780497	1.04854	1.04498	0.716339	0.936621	0.813793	0.827586	0.896552	0.845977	1.00315	1.19243	0.675079	0.956887	1.0175	0.985108	1.19695	1.06652	0.875246	0.86342	0.868997	0.869221	0.253705	0.294906	0.328249	0.292287	0.291984	0.370031	0.608507	0.423507
Hyperoside		1.082	1.131	1.421	1.21133	0.852	0.873	0.801	0.842	1.03088	1.0581	1.23011	1.10636	0.971	0.978	0.966	0.971667	1.3787	1.89957	0.902756	1.39367	1.61648	1.60782	1.76952	1.66461	1.47586	2.12414	1.26897	1.62299	1.29968	1.32492	1.33754	1.32072	0.994912	0.956565	1.05063	1.0007	0.979376	0.89438	0.950243	0.941333	1.51987	4.9661	2.05805	2.84801	0.687361	0.729218	0.596144	0.670908
Tolterodine tartrate		1.477	1.167	1.132	1.25867	0.983	0.869	0.963	0.938333	1.2035	1.02705	1.06022	1.09692	0.975	0.939	0.985	0.966333	1.25571	0.872009	1.2195	1.11574	1.04004	1.06183	1.09677	1.06621	1.83448	1.0069	1.36552	1.4023	0.9653	0.870662	0.996845	0.944269	0.895508	0.890668	0.888806	0.89166	0.994183	0.825537	0.882746	0.900822	0.487864	0.358116	0.80929	0.551757	0.92424	0.155087	1.26523	0.781518
Trimebutine maleate		1.211	1.192	1.282	1.22833	1.097	1.186	1.198	1.16033	1.07092	1.13321	1.08678	1.09697	1.018	1.008	1.015	1.01367	0.679341	1.12326	0.598199	0.800267	0.725305	0.664709	0.80337	0.731128	0.813793	1.32414	0.758621	0.965517	0.750789	0.744479	0.908517	0.801262	0.928766	0.878878	0.963763	0.923802	1.00082	0.822076	0.899764	0.907553	0.285358	0.372935	0.258482	0.305592	0.937616	0.694569	0.559211	0.730465
Lamivudine		1.161	1.181	1.118	1.15333	1.009	1.183	1.254	1.14867	1.09721	1.05097	1.09611	1.08143	0.991	1.014	1.058	1.021	1.62121	0.886018	0.798144	1.10179	0.814964	0.802597	1.10836	0.908641	1.86207	1.03448	0.882759	1.25977	0.776025	0.895899	1.3123	0.994742	0.931621	1.01675	1.10325	1.01721	1.01274	0.946781	0.970338	0.97662	1.00824	0.522787	0.88411	0.805044	0.460281	0.478182	0.685085	0.541183
Losartan potassium		0.976	1.038	1.089	1.03433	1.301	1.037	1.14	1.15933	1.04437	1.08926	1.00215	1.04526	1.025	1.008	0.998	1.01033	1.74366	1.59902	1.26753	1.53674	0.986087	1.26295	1.08487	1.1113	1.68276	1.64138	1.36552	1.56322	1.21136	1.23659	1.16719	1.20505	1.04058	0.993299	1.01018	1.01469	0.894957	0.980914	1.00245	0.959441	3.88196	3.40989	1.75149	3.01445	1.02293	0.793756	0.951583	0.922755
Paroxetine maleate		0.321	0.169	0.199	0.229667	0.088	0.045	0.026	0.053	0.902978	0.768804	0.970135	0.880639	0.763	0.691	0.647	0.700333	0.564541	0.493951	0.489766	0.516086	0.0762096	0.445973	1.57196	0.698047	0.17931	0.0827586	0.0965517	0.11954	0.00630915	0.0189274	0.0378549	0.0210305	0.737032	0.774882	0.51787	0.676595	0.390174	0.879958	0.338541	0.536224	0.00265918	0.0120445	0.00156422	0.00542263	0.000286443	0.000337112	0.00036745	0.000330335
Benidipine hydrochloride		0.785	0.636	0.585	0.668667	0.653	0.385	0.467	0.501667	0.807392	0.839937	0.785129	0.810819	0.953	0.796	0.848	0.865667	0.63968	0.591831	0.763031	0.664847	0.511516	1.04096	1.0725	0.874994	0.496552	0.372414	0.441379	0.436782	0.315457	0.378549	0.473186	0.389064	1.07781	1.10623	1.00869	1.06424	0.771405	0.819384	0.766502	0.785764	0.41008	0.175747	0.190215	0.258681	0.459979	0.480865	0.524221	0.488355
Naltrindole hydrochloride hydrate		0.603	0.671	0.569	0.614333	0.364	0.342	0.37	0.358667	0.616518	0.7567	0.710562	0.694593	0.762	0.754	0.788	0.768	0.462294	0.602929	1.05431	0.70651	0.753594	1.40532	1.03061	1.06317	0.275862	0.4	0.593103	0.422989	0.258675	0.454259	0.359621	0.357518	1.09866	0.858277	0.947257	0.968065	0.699101	0.635258	0.560165	0.631508	0.224131	0.176158	0.197161	0.19915	0.311231	0.515091	0.413369	0.41323
Perospirone hydrochloride		0.752	0.861	0.915	0.842667	0.481	0.506	0.559	0.515333	1.01061	1.03256	0.936749	0.993309	0.909	0.898	0.94	0.915667	2.04003	1.83062	1.93669	1.93578	3.12784	2.77214	2.48678	2.79559	1.51724	1.55862	1.75172	1.6092	1.41956	1.32492	1.3123	1.35226	1.09481	1.02408	1.02606	1.04832	0.979857	0.999375	0.959185	0.979472	7.23793	4.27729	1.97182	4.49568	2.63582	2.34315	2.14688	2.37528
Bifonazole		0.672	0.658	0.478	0.602667	0.79	0.6	0.492	0.627333	0.772955	0.785076	0.806919	0.788317	0.938	0.924	0.893	0.918333	0.767579	0.677704	0.75921	0.734831	0.922245	1.29185	1.30515	1.17308	0.510345	0.441379	0.358621	0.436782	0.687697	0.731861	0.605678	0.675079	1.04145	1.01837	0.863862	0.974559	0.835921	0.847652	0.838325	0.840633	0.387052	0.0355587	0.19167	0.20476	1.2024	1.75719	1.37568	1.44509
Chlorpheniramine maleate		1.205	1.328	1.305	1.27933	1.238	1.225	1.248	1.237	1.05074	1.16506	1.19723	1.13768	1.018	1.032	1.015	1.02167	0.798508	0.766852	0.769217	0.778192	0.723296	0.878188	0.535631	0.712372	0.951724	1.0069	0.993103	0.983908	0.845426	1.01577	0.630915	0.830705	0.916232	0.929511	0.906304	0.917349	0.853324	0.914571	0.870631	0.879509	0.349119	0.37714	0.345909	0.357389	0.166672	0.337054	0.353748	0.285825
SKF 83566 hydrobromide		1.066	1.042	0.922	1.01	0.924	0.992	1.104	1.00667	1.02881	0.992451	0.907112	0.976125	0.983	0.97	0.99	0.981	1.39944	1.16474	1.36105	1.30841	1.00541	0.734117	0.962745	0.900757	1.47586	1.2	1.24138	1.30575	0.876972	0.687697	1.00315	0.855941	0.89166	0.931993	0.958302	0.927319	0.948512	0.943032	0.853324	0.914956	0.45087	0.387037	0.68158	0.506496	0.442831	0.339574	0.658321	0.480242
Scopolamine hydrobromide		1.012	1	1.27	1.094	1.321	1.029	1.168	1.17267	1.08548	1.05903	1.19135	1.11195	1.02	1.013	1	1.011	1.59884	1.67288	1.37251	1.54808	1.29031	1.20111	1.33916	1.27686	1.6	1.65517	1.72414	1.65977	1.60883	1.16719	1.47634	1.41746	0.920204	1.02234	1.00372	0.982088	1.04437	0.884573	1.02485	0.9846	5.61164	3.70759	2.94162	4.08695	0.581536	0.792759	0.818565	0.730953
Atomoxetine hydrochloride		1.168	1.148	0.957	1.091	0.875	0.95	0.815	0.88	1.03558	1.11978	0.965633	1.04033	0.955	0.995	0.979	0.976333	1.13418	1.34904	1.51606	1.33309	1.20668	1.41428	1.13109	1.25068	1.31034	1.53103	1.43448	1.42529	0.996845	1.26814	0.870662	1.04522	1.05895	0.841152	1.07756	0.992554	0.961011	0.899188	0.9588	0.939666	0.680963	3.35698	0.705929	1.58129	0.748396	0.965787	0.745199	0.819794
Dexchlorpheniramine maleate		1.231	1.279	1.208	1.23933	1.257	1.114	1.345	1.23867	1.05796	1.10264	1.06809	1.07623	1.003	1.012	1.035	1.01667	0.940235	0.676249	0.565633	0.727372	0.749729	0.744164	0.616324	0.703406	1.14483	0.855172	0.675862	0.891954	0.88959	0.782334	0.782334	0.818086	1.00372	0.871556	0.980889	0.952056	0.976011	0.962454	1.00322	0.980562	0.567471	0.417776	0.126804	0.370684	0.752236	0.386868	0.389565	0.509557
Efavirenz		0.256	0.303	0.025	0.194667	0.077	0.071	0.135	0.0943333	0.907269	0.948975	0.424628	0.760291	0.789	0.822	0.889	0.833333	0.272355	0.276358	1.1027	0.550472	0.521101	0.0942959	1.6845	0.766631	0.0689655	0.0827586	0.0275862	0.0597701	0.0378549	0.00630915	0.214511	0.086225	0.852569	0.842889	0.413874	0.703111	0.427672	0.457959	0.679487	0.521706	0.00138266	0.00160593	0.00562077	0.00286979	0.000149885	0.000162642	0.000192421	0.000168316
Esmolol hydrochloride		0.846	0.975	0.908	0.909667	1.071	1.099	0.954	1.04133	1.02177	1.04794	1.01401	1.02791	1.026	1.001	1.005	1.01067	1.68089	1.73074	1.73492	1.71552	1.33498	1.25877	1.21178	1.26851	1.4069	1.66897	1.55862	1.54483	1.35016	1.30599	1.09148	1.24921	0.980516	0.880119	1.08191	0.980847	0.980818	1.00428	0.977165	0.98742	3.44127	4.6787	1.20568	3.10855	0.986331	0.431522	0.793362	0.737072
Pancuronium dibromide		1.341	1.271	1.148	1.25333	1.229	1.178	0.857	1.088	1.15773	1.18748	1.16696	1.17072	1.021	1.012	0.977	1.00333	0.7281	1.33867	1.05667	1.04115	1.01716	1.20266	1.27129	1.1637	0.965517	1.68276	1.2	1.28276	1.17981	1.33754	1.02839	1.18191	1.07012	1.07595	0.870688	1.00558	1.01101	0.973992	0.927071	0.970691	0.90236	0.848673	0.682415	0.811149	1.01378	0.578913	1.034	0.875563
Duloxetine hydrochloride		0.074	0.12	0.078	0.0906667	0.029	0.08	0.074	0.061	0.866789	0.808443	0.0686985	0.58131	0.737	0.873	0.892	0.834	0.562722	0.349859	0.356772	0.423118	0	0.168032	0.545525	0.237852	0.0413793	0.0413793	0.0275862	0.0367816	0	0.0126183	0.0378549	0.0168244	0.544552	0.799082	0.612683	0.652106	0	0.457766	0.555839	0.337868	0.00222672	-0.0065958	0.00199967	-0.000789806	0.0146377	0.00162642	0.000392253	0.00555214
1,1-Dimethyl-4-phenylpiperazinium iodide		0.875	1.135	0.876	0.962	1.194	1.176	1.12	1.16333	0.911894	1.05216	1.00377	0.989274	1.014	1.035	1.016	1.02167	1.19585	0.823615	1.05049	1.02332	0.873396	1.07946	1.31906	1.09064	1.03448	0.924138	0.910345	0.956322	0.984227	1.19874	1.39432	1.19243	0.914743	0.923058	1.04207	0.959957	0.947454	1.01245	0.984376	0.981427	0.249527	0.239755	0.299638	0.262973	0.992603	0.625156	1.06117	0.892976
Ropivacaine hydrochloride		1.103	1.204	1.266	1.191	1.587	1.12	1.104	1.27033	1.15395	1.03915	1.11188	1.10166	1.053	1.012	0.983	1.016	0.922951	1.06541	0.606022	0.864793	0.749729	1.26527	0.986551	1.00052	1.0069	1.26897	0.758621	1.01149	1.12303	1.33754	1.02839	1.16299	1.06428	0.931248	0.972077	0.989203	0.995433	0.968415	0.94332	0.969056	3.64597	0.880574	1.0843	1.87028	0.560425	0.609984	0.900106	0.690172
Donepezil hydrochloride		1.002	1.099	0.964	1.02167	1.181	1.237	1.009	1.14233	0.950184	0.971764	0.93011	0.950686	1.001	1.006	1.017	1.008	0.61239	0.634768	0.520695	0.589284	0.798114	0.605194	0.748338	0.717215	0.606897	0.689655	0.496552	0.597701	0.88959	0.706625	0.712934	0.769716	0.948126	1.03276	0.899355	0.960081	0.927744	0.974376	0.946397	0.949506	0.425998	0.18518	0.167619	0.259599	0.663225	0.493314	0.940956	0.699165
Pefloxacin mesylate	99	1.405	1.891	1.587	1.62767	0.834	1.108	1.1	1.014	1.28696	1.40831	1.30922	1.33483	0.951	0.995	1.022	0.989333	0.746915	0.587039	0.699884	0.677946	1.23993	1.25174	0.897195	1.12962	0.890323	0.941935	0.941935	0.924731	1.08511	1.4539	1.03546	1.19149	0.969229	1.17135	0.954673	1.03175	0.926028	0.957128	0.936492	0.939883	0.141352	0.665797	0.682781	0.496643	0	0	0	0
Itavastatin calcium		1.075	1.253	1.163	1.16367	0.521	0.559	0.533	0.537667	0.971376	1.20747	1.06685	1.0819	0.864	0.91	0.83	0.868	0.523555	0.582538	0.693054	0.599715	1.86744	1.78898	2.45978	2.03873	0.477419	0.619355	0.683871	0.593548	1.02128	1.04965	1.37589	1.14894	1.03307	0.996936	0.940117	0.990041	0.897738	1.00557	0.947634	0.950314	0.332195	0.579527	0.474443	0.462055	0	0	0	0
Buflomedil hydrochloride		1.667	1.492	1.481	1.54667	0.908	1.131	1.295	1.11133	1.31306	1.15421	1.2137	1.22699	0.983	0.967	1.007	0.985667	0.711835	0.69352	0.996508	0.800621	0.923964	0.735583	0.663392	0.774313	1.00645	0.877419	1.25161	1.04516	0.879433	0.87234	0.900709	0.884161	0.772344	1.07252	0.885981	0.910283	0.943177	1.03909	0.984547	0.988939	0.256436	0.384867	0.157047	0.266116	0	0	0	0
Valaciclovir hydrochloride		1.25	1.68	1.099	1.343	0.999	1.028	1.091	1.03933	1.06052	1.26706	0.935083	1.08756	0.983	0.996	1.002	0.993667	0.912379	0.806054	1.12161	0.946682	0.934359	1.08572	1.39413	1.13807	0.967742	1.14839	1.04516	1.05376	0.978723	1.17021	1.59574	1.24823	1.05197	0.866828	0.944586	0.95446	1.06012	0.91198	0.979509	0.983869	0.347005	0.228298	0.175565	0.250289	0	0	0	0
Rosiglitazone maleate		1.483	1.81	1.69	1.661	1.221	1.185	1.074	1.16	1.17255	1.43188	1.39408	1.33284	1.012	0.989	0.98	0.993667	1.29267	1.26892	1.12549	1.22903	1.27979	1.46034	1.59889	1.44634	1.62581	1.94839	1.6129	1.72903	1.6383	1.8156	1.80142	1.75177	1.11019	1.00204	1.15705	1.08976	0.975343	0.986485	0.92254	0.961456	0.994862	2.88917	1.84662	1.91022	0	0	0	0
Dexbrompheniramine maleate		1.573	1.677	1.534	1.59467	1.444	1.233	1.224	1.30033	1.28455	1.26476	1.2372	1.26217	1.028	1.022	1.008	1.01933	0.822041	0.571517	0.753745	0.715768	1.10508	1.10252	0.845365	1.01766	1.09677	0.812903	0.980645	0.963441	1.67376	1.42553	1.08511	1.3948	0.914198	0.933606	1.01979	0.955865	1.02815	1.05983	1.01594	1.03464	1.78439	0.621315	0.281738	0.895816	0	0	0	0
Irinotecan hydrochloride		1.494	1.267	1.274	1.345	0.463	0.441	0.458	0.454	1.12988	0.976414	1.0261	1.04413	0.888	0.814	0.818	0.84	11.7433	12.4487	13.0504	12.4141	13.8447	11.5231	11.536	12.3012	14.8774	13.3806	14.1032	14.1204	6.7234	5.32624	5.53901	5.86288	0.918922	0.973698	0.963994	0.952205	0.803468	0.813835	0.903454	0.840253	0.0695742	0.123059	0.0603757	0.0843363	0	0	0	0
Tropisetron hydrochloride		1.514	1.541	1.209	1.42133	1.016	0.938	1.215	1.05633	1.21949	1.24642	0.998073	1.15466	0.993	0.96	1.015	0.989333	0.843927	0.750485	0.968568	0.854327	0.692297	0.7783	0.846077	0.772225	1.08387	0.980645	0.993548	1.01935	0.737589	0.765957	1.07801	0.86052	0.870403	0.819714	0.983784	0.891301	0.975343	0.830015	0.842416	0.882591	0.216701	0.320457	0.157309	0.231489	0	0	0	0
Piribedil hydrochloride		1.316	1.691	1.608	1.53833	1.351	1.321	1.211	1.29433	1.18587	1.33878	1.17285	1.2325	1.025	1.025	1.018	1.02267	1.09802	1.08809	0.870159	1.01876	0.920832	1.05468	1.11676	1.03076	1.22581	1.56129	1.1871	1.32473	1.30496	1.46099	1.41844	1.3948	0.935138	1.11147	1.13534	1.06065	0.976893	0.922153	0.971952	0.956999	1.38021	1.58613	2.36294	1.77643	0	0	0	0
Maprotiline hydrochloride		0.3	0.273	0.228	0.267	0.081	0.076	0.035	0.064	0.788583	0.774934	0.936222	0.833246	0.864	0.795	0.752	0.803667	0.152115	0.0555685	1.19907	0.468917	0.333049	0.711946	0.384878	0.476624	0.0387097	0.0129032	0.232258	0.0946237	0.0283688	0.0567376	0.0141844	0.0330969	0.939479	0.473059	0.607635	0.673391	0.46718	0.908783	1.1322	0.836054	-0.0396785	0.00764036	0.00236755	-0.00989019	0	0	0	0
Droperidol		1.645	1.387	1.548	1.52667	1.201	1.2	1.087	1.16267	1.21069	1.20056	1.16436	1.19187	1.004	1.001	0.962	0.989	0.693364	0.789756	0.628793	0.703971	0.568845	0.648014	0.703261	0.64004	0.967742	0.929032	0.825806	0.907527	0.716312	0.815603	0.801418	0.777778	1.08478	0.927094	0.877171	0.963015	0.996754	0.984062	0.89115	0.957322	0.12749	0.164723	0.13342	0.141878	0	0	0	0
						#N/A	#N/A	#N/A						#N/A	#N/A	#N/A						#N/A	#N/A	#N/A						#N/A	#N/A	#N/A						#N/A	#N/A	#N/A						#N/A	#N/A	#N/A
						#N/A	#N/A	#N/A						#N/A	#N/A	#N/A						#N/A	#N/A	#N/A						#N/A	#N/A	#N/A						#N/A	#N/A	#N/A						#N/A	#N/A	#N/A
						#N/A	#N/A	#N/A						#N/A	#N/A	#N/A						#N/A	#N/A	#N/A						#N/A	#N/A	#N/A						#N/A	#N/A	#N/A						#N/A	#N/A	#N/A
						#N/A	#N/A	#N/A						#N/A	#N/A	#N/A						#N/A	#N/A	#N/A						#N/A	#N/A	#N/A						#N/A	#N/A	#N/A						#N/A	#N/A	#N/A
						#N/A	#N/A	#N/A						#N/A	#N/A	#N/A						#N/A	#N/A	#N/A						#N/A	#N/A	#N/A						#N/A	#N/A	#N/A						#N/A	#N/A	#N/A
						#N/A	#N/A	#N/A						#N/A	#N/A	#N/A						#N/A	#N/A	#N/A						#N/A	#N/A	#N/A						#N/A	#N/A	#N/A						#N/A	#N/A	#N/A
						#N/A	#N/A	#N/A						#N/A	#N/A	#N/A						#N/A	#N/A	#N/A						#N/A	#N/A	#N/A						#N/A	#N/A	#N/A						#N/A	#N/A	#N/A
						#N/A	#N/A	#N/A						#N/A	#N/A	#N/A						#N/A	#N/A	#N/A						#N/A	#N/A	#N/A						#N/A	#N/A	#N/A						#N/A	#N/A	#N/A
						#N/A	#N/A	#N/A						#N/A	#N/A	#N/A						#N/A	#N/A	#N/A						#N/A	#N/A	#N/A						#N/A	#N/A	#N/A						#N/A	#N/A	#N/A
						#N/A	#N/A	#N/A						#N/A	#N/A	#N/A						#N/A	#N/A	#N/A						#N/A	#N/A	#N/A						#N/A	#N/A	#N/A						#N/A	#N/A	#N/A
						#N/A	#N/A	#N/A						#N/A	#N/A	#N/A						#N/A	#N/A	#N/A						#N/A	#N/A	#N/A						#N/A	#N/A	#N/A						#N/A	#N/A	#N/A
						#N/A	#N/A	#N/A						#N/A	#N/A	#N/A						#N/A	#N/A	#N/A						#N/A	#N/A	#N/A						#N/A	#N/A	#N/A						#N/A	#N/A	#N/A
						#N/A	#N/A	#N/A						#N/A	#N/A	#N/A						#N/A	#N/A	#N/A						#N/A	#N/A	#N/A						#N/A	#N/A	#N/A						#N/A	#N/A	#N/A
						#N/A	#N/A	#N/A						#N/A	#N/A	#N/A						#N/A	#N/A	#N/A						#N/A	#N/A	#N/A						#N/A	#N/A	#N/A						#N/A	#N/A	#N/A
						#N/A	#N/A	#N/A						#N/A	#N/A	#N/A						#N/A	#N/A	#N/A						#N/A	#N/A	#N/A						#N/A	#N/A	#N/A						#N/A	#N/A	#N/A
						#N/A	#N/A	#N/A						#N/A	#N/A	#N/A						#N/A	#N/A	#N/A						#N/A	#N/A	#N/A						#N/A	#N/A	#N/A						#N/A	#N/A	#N/A
						#N/A	#N/A	#N/A						#N/A	#N/A	#N/A						#N/A	#N/A	#N/A						#N/A	#N/A	#N/A						#N/A	#N/A	#N/A						#N/A	#N/A	#N/A
[truncated: 9 more columns]

## Sheet: 100 uM Discard Drugs
D1 hAMSCs					D2 hAMSCs
Plate	Drug	Discard (Based off filter and image)?	Notes		Plate	Drug	Discard (Based off filter and image)?	Notes
1	Primaquine diphosphate	YES			1	Chlorpromazine hydrochloride	YES
1	Chlorpromazine hydrochloride	YES			1	Primaquine diphosphate	YES
2	5-Nonyloxytryptamine hydrochloride	YES			1	Chloroxine	YES
2	Disulfiram	YES			2	Azelastine hydrochloride	YES
3	Cisapride hydrate	YES	Crystals		2	5-Nonyloxytryptamine hydrochloride	YES
3	Diphenylcyclopropenone	YES			2	Disulfiram	YES
3	Oligomycin A	YES			2	Carvedilol	YES
13	Ebselen	YES			3	Diphenylcyclopropenone	YES
13	Digoxin	YES			3	Oligomycin A	YES
13	Atracurium besylate	YES			3	Cisapride hydrate	YES
13	Clomifene citrate	YES			13	Digoxin	YES
13	Fluphenazine dihydrochloride	YES			13	Naftopidil	YES
14	Nortriptyline hydrochloride	YES			13	CGS 12066B dimaleate	YES
15	Raloxifene hydrochloride	YES			13	Etoposide	YES
25	Oxiconazole nitrate	YES			13	Atracurium besylate	YES
25	Clomipramine hydrochloride	YES			13	Clomifene citrate	YES
25	Tamoxifen	YES			13	Fluphenazine dihydrochloride	YES
26	Daunorubicin hydrochloride	YES			13	Ebselen	YES
26	Thiothixene	YES			14	Nortriptyline hydrochloride	YES
26	Fluoxetine hydrochloride	YES			15	Cyproheptadine hydrochloride	YES
26	Felodipine	YES			25	Oxiconazole nitrate	YES
27	Loperamide hydrochloride	YES			25	Clomipramine hydrochloride	YES
37	CGS 15943	YES	Crystals		25	Tamoxifen	YES
37	Tacrolimus	YES			26	Thiothixene	YES
37	Clotrimazole	YES			26	Promethazine hydrochloride	YES
37	Rimcazole dihydrochloride	YES			26	Fluoxetine hydrochloride	YES
37	Prochlorperazine maleate	YES			26	Felodipine	YES
38	Aripiprazole	YES			26	Daunorubicin hydrochloride	YES
38	Altanserin hydrochloride	YES	Crystals		27	Loperamide hydrochloride	YES
39	Stanozolol	YES	Crystals		37	CGS 15943	YES
39	Megestrol acetate	YES	Crystals		37	Tacrolimus	YES
39	Lacidipine	YES			37	Clotrimazole	YES
39	Amlodipine	YES			37	Rimcazole dihydrochloride	YES
39	Saquinavir mesylate	YES			37	Prochlorperazine maleate	YES
49	Toremifene citrate	YES			38	Aripiprazole	YES
49	N-Methylparoxetine	YES			38	Altanserin hydrochloride	YES
49	Doxycycline	YES	Fluorescent		39	Stanozolol	YES
50	Quinacrine hydrochloride hydrate	YES	Fluorescent		39	Itraconazole	YES
51	Desloratadine	YES			39	Megestrol acetate	YES
61	Honokiol	YES			39	Lacidipine	YES
62	Salmeterol	YES			39	Vindesine sulfate	YES
62	Idarubicin hydrochloride	YES			39	Amlodipine	YES
62	SDM25N hydrochloride	YES			39	Saquinavir mesylate	YES
62	Miconazole nitrate	YES			49	Fluocinolone acetonide 21-acetate	YES
62	Perphenazine	YES			49	Toremifene citrate	YES
63	Econazole nitrate	YES			49	Desipramine hydrochloride	YES
63	Thioridazine hydrochloride	YES			49	N-Methylparoxetine	YES
74	Amoxapine	YES			49	Gemcitabine hydrochloride	YES
74	Mefloquine hydrochloride	YES			49	Doxycycline	YES
74	Estradiol valerate	YES	Crystals		50	Quinacrine hydrochloride hydrate	YES
74	Mebendazole	YES			51	Desloratadine	YES
75	Mitoxantrone hydrochloride	YES			61	Honokiol	YES
75	Dactinomycin	YES			61	Topotecan hydrochloride	YES
85	Triptolide	YES	Crystals		62	Salmeterol	YES
85	Tosufloxacin tosilate	YES			62	Idarubicin hydrochloride	YES
85	Tegaserod maleate	YES	Crystals		62	SDM25N hydrochloride	YES
85	Pioglitazone hydrochloride	YES	Crystals		62	Miconazole nitrate	YES
87	Indirubin	YES			62	Perphenazine	YES
87	Sertraline hydrochloride	YES			63	Econazole nitrate	YES
97	Epirubicin hydrochloride	YES			63	Ru 24969 hemisuccinate	YES
97	Indatraline hydrochloride	YES			63	Thioridazine hydrochloride	YES
97	Pizotyline maleate	YES			73	Homoharringtonine	YES
97	AM 404	YES	Crystals		74	Mefloquine hydrochloride	YES
97	Fluticasone propionate	YES			74	Estradiol valerate	YES
97	Trifluoperazine hydrochloride	YES	Crystals		74	Mebendazole	YES
97	Doxorubicin hydrochloride	YES			74	Oxymetholone	YES
97	Bifemelane hydrochloride	YES			74	Amoxapine	YES
98	Paroxetine maleate	YES			75	Mitoxantrone hydrochloride	YES
98	Efavirenz	YES			75	Dactinomycin	YES
98	Duloxetine hydrochloride	YES			85	Triptolide	YES
99	Maprotiline hydrochloride	YES	Fluorescent		85	Tosufloxacin tosilate	YES
63	Ru 24969 hemisuccinate	YES	Fluorescent		85	Tegaserod maleate	YES
99	Irinotecan hydrochloride	YES			85	Pioglitazone hydrochloride	YES
					86	Vinorelbine tartrate	YES
					87	Anagrelide hydrochloride	YES
					87	Indirubin	YES
					87	Sertraline hydrochloride	YES
					87	Nelfinavir mesylate	YES
					97	Pizotyline maleate	YES
					97	AM 404	YES
					97	Loratadine	YES
					97	Fluticasone propionate	YES
					97	Trifluoperazine hydrochloride	YES
					97	Prazosin hydrochloride hydrate	YES
					97	Doxorubicin hydrochloride	YES
					97	Bifemelane hydrochloride	YES
					97	Epirubicin hydrochloride	YES
					97	Indatraline hydrochloride	YES
					98	Paroxetine maleate	YES
					98	Efavirenz	YES
					98	Duloxetine hydrochloride	YES
					99	Irinotecan hydrochloride	YES
					99	Maprotiline hydrochloride	YES

## Sheet: 13 uM
		Hoechst Ratio								Viability Ratio								TE FC								GFP FC								Transgene FC								RLU/mg FC
		Donor 1 hAMSCs				Donor 2 hAMSCs				Donor 1 hAMSCs				Donor 2 hAMSCs				Donor 1 hAMSCs				Donor 2 hAMSCs				Donor 1 hAMSCs				Donor 2 hAMSCs				Donor 1 hAMSCs				Donor 2 hAMSCs				Donor 1 hAMSCs				Donor 2 hAMSCs
Drug	Plate	Well 1	Well 2	Well 3	Average	Well 1	Well 2	Well 3	Average	Well 1	Well 2	Well 3	Average	Well 1	Well 2	Well 3	Average	Well 1	Well 2	Well 3	Average	Well 1	Well 2	Well 3	Average	Well 1	Well 2	Well 3	Average	Well 1	Well 2	Well 3	Average	Well 1	Well 2	Well 3	Average	Well 1	Well 2	Well 3	Average	Well 1	Well 2	Well 3	Average	Well 1	Well 2	Well 3	Average
Primaquine diphosphate	4	1.053	1.062	0.935	1.01667	0.948	0.914	0.797	0.886333	1.02401	1.00379	0.952596	0.993467	0.972	0.983	0.938	0.964333	0.50056	0.413896	0.611132	0.508529	0.699501	0.907469	0.951591	0.852854	0.585366	0.487805	0.634146	0.569106	0.670659	0.838323	0.766467	0.758483	1.42297	1.00429	0.876024	1.10109	0.989506	0.980654	0.877505	0.949222				#DIV/0!	0.464638	0.291272	0.315072	0.356994
Chloroxine		0.607	0.675	0.711	0.664333	0.898	1.197	1.159	1.08467	0.809094	0.845018	0.997286	0.883799	0.983	1.005	1.027	1.005	0.579006	0.324991	2.28465	1.06288	1.20073	1.02916	1.06288	1.09759	0.390244	0.243902	1.80488	0.813008	1.08982	1.24551	1.24551	1.19361	1.02981	1.06224	0.762133	0.951394	1.02074	0.996071	0.93639	0.9844				#DIV/0!	0.72863	0.494214	0.333091	0.518645
Dehydrocholic acid		1.384	1.264	1.346	1.33133	1.13	1.455	1.001	1.19533	1.07664	1.05816	1.12162	1.08547	1.023	1.053	1.012	1.02933	1.01532	1.04221	0.881584	0.979704	1.04785	0.976885	1.13651	1.05375	1.56098	1.46341	1.31707	1.44715	1.1976	1.43713	1.1497	1.26148	0.835906	1.01766	1.08631	0.97996	1.11135	0.834635	1.19351	1.0465				#DIV/0!	0.901565	0.516608	1.11348	0.843884
Bendrofluazide		1.269	1.269	1.333	1.29033	0.908	1.018	0.967	0.964333	1.01827	1.0348	1.07941	1.04416	0.963	1.031	1.044	1.01267	0.830781	0.865148	0.593201	0.763043	1.77447	0.977166	1.39661	1.38275	1.17073	1.21951	0.878049	1.08943	1.62874	1.00599	1.36527	1.33333	1.05221	1.20689	0.830557	1.02988	0.929129	0.972994	1.00025	0.967457				#DIV/0!	1.40358	1.32074	0.805879	1.17673
Triamterene		1.268	0.975	1.052	1.09833	1.138	1.188	1.43	1.252	1.06808	0.977354	0.999366	1.01493	1.062	0.989	0.974	1.00833	0.450504	1.03549	1.29473	0.926908	1.13455	1.2367	0.778332	1.04986	0.634146	1.12195	1.5122	1.08943	1.30539	1.48503	1.12575	1.30539	0.798462	0.936424	1.10336	0.946082	0.920078	1.0275	1.01547	0.987683				#DIV/0!	0.883601	1.08458	0.563798	0.843993
Homoveratrylamine		0.96	0.758	0.803	0.840333	1.561	0.963	1.033	1.18567	0.993763	0.869846	0.896587	0.920065	1.032	0.972	0.995	0.999667	1.73851	1.67949	1.25812	1.55871	0.955947	1.73498	1.57156	1.42083	1.85366	1.41463	1.12195	1.46341	1.50898	1.68862	1.64072	1.61277	0.943556	0.783195	0.911462	0.879404	0.991396	0.907346	0.920674	0.939805				#DIV/0!	1.05055	0.605763	1.07517	0.910495
Dolasetron mesylate		1.305	1.304	1.26	1.28967	1.11	1.375	1.25	1.245	1.02715	1.0731	1.05127	1.05051	0.997	1.028	1.004	1.00967	0.471423	1.65035	0.940605	1.02079	1.20565	0.835664	1.10855	1.04995	0.682927	2.39024	1.31707	1.46341	1.35329	1.16168	1.4012	1.30539	1.01343	0.882487	1.12242	1.00611	0.86736	0.989208	0.897299	0.917956				#DIV/0!	0.7866	0.703894	0.578488	0.689661
Ganciclovir		1.495	1.274	1.191	1.32	0.988	1.736	1.225	1.31633	1.09632	1.07546	1.08784	1.08654	0.988	1.038	1.028	1.018	1.08704	0.758312	0.811356	0.885568	1.0071	0.763999	0.822033	0.864376	1.80488	1.07317	1.07317	1.31707	1.00599	1.34132	1.01796	1.12176	0.948682	0.945228	1.12999	1.00797	0.759735	0.913015	1.0086	0.893785				#DIV/0!	0.418614	0.52974	0.576011	0.508122
Sulfacetamide		1.279	1.025	1.062	1.122	0.722	1.023	1.16	0.968333	1.07151	1.07128	0.973831	1.03887	0.989	0.958	0.963	0.97	0.720956	1.19985	1.15801	1.02627	1.4101	2.30535	1.41952	1.71166	1.02439	1.36585	1.36585	1.25203	1.02994	2.38323	1.66467	1.69261	0.948014	1.06737	0.964841	0.993407	0.960163	1.06311	1.05645	1.02657				#DIV/0!	0.567395	1.3193	1.10156	0.996085
Cefoxitin sodium		1.025	0.922	0.849	0.932	0.967	1.608	0.939	1.17133	0.993346	0.994525	0.94229	0.976721	0.968	1.043	0.951	0.987333	1.02802	0.999626	0.776242	0.934628	1.59264	0.847327	1.1479	1.19595	1.17073	1.02439	0.731707	0.97561	1.55689	1.37725	1.08982	1.34132	1.30952	1.18839	0.832005	1.10997	0.920078	0.951112	0.866862	0.912684				#DIV/0!	0.948876	0.266746	0.738472	0.651364
Nicotinic acid		1.393	1.527	1.443	1.45433	1.34	1.468	1.462	1.42333	1.047	1.12266	1.13731	1.10232	1.033	1.034	1.048	1.03833	0.693313	1.2656	0.973478	0.977462	1.17544	0.661842	0.988688	0.941989	1.07317	2.14634	1.56098	1.5935	1.59281	0.982036	1.46108	1.34531	0.927509	0.88037	1.0268	0.944893	1.028	0.899786	0.966529	0.964772				#DIV/0!	0.530786	0.64086	0.444653	0.538766
Sulfinpyrazone		1.461	1.356	1.371	1.396	1.09	1.516	1.057	1.221	1.14088	1.10024	1.0969	1.11268	1.018	1.043	1.016	1.02567	1.02204	0.679866	0.8644	0.855435	1.05417	1.04728	0.8292	0.976885	1.65854	1.02439	1.31707	1.33333	1.16168	1.60479	0.886228	1.21756	0.814287	0.966067	1.16443	0.981594	0.938081	1.03506	1.03098	1.00138				#DIV/0!	0.539324	0.649896	0.622638	0.603952
SB 205607 dihydrobromide		1.293	1.018	1.049	1.12	1.289	1.495	1.44	1.408	1.04594	0.983415	1.01928	1.01621	1.082	1.016	1.006	1.03467	0.543145	0.603661	1.29847	0.815092	0.744467	0.895524	0.904939	0.84831	0.780488	0.682927	1.5122	0.99187	0.97006	1.35329	1.31737	1.21357	1.16398	0.593971	0.818298	0.858751	1.00373	1.02044	0.920376	0.981516				#DIV/0!	0.477917	0.71887	0.613377	0.603388
Chlorpromazine hydrochloride		1.085	1.048	0.767	0.966667	1.346	1.472	1.269	1.36233	0.993846	1.00662	0.906241	0.968902	1.009	1.02	0.984	1.00433	0.809862	0.502802	0.916698	0.74312	0.695145	0.80475	0.998384	0.83276	0.97561	0.585366	0.780488	0.780488	0.946108	1.1976	1.28144	1.14172	0.952025	0.856633	0.86878	0.89248	0.967126	1.06381	1.02412	1.01835				#DIV/0!	0.301328	0.439426	0.436354	0.392369
Chlorpropamide		1.105	1.44	1.429	1.32467	1.214	1.605	1.592	1.47033	1.0017	1.1078	1.09262	1.06737	1.012	1.017	1.056	1.02833	0.67613	1.34255	0.799402	0.93936	1.05389	0.819223	0.855898	0.90967	0.829268	2.14634	1.26829	1.41463	1.29341	1.32934	1.37725	1.33333	0.778849	0.945005	1.04675	0.923534	1.04561	1.03476	1.04869	1.04302				#DIV/0!	0.374291	0.512061	0.548432	0.478261
Tolbutamide		1.538	1.462	1.418	1.47267	1.217	1.333	0.989	1.17967	1.15912	1.11385	1.08858	1.12052	0.992	1.036	1.033	1.02033	1.02802	0.540157	0.464699	0.677624	1.25539	0.915478	1.25778	1.14288	1.7561	0.878049	0.731707	1.12195	1.54491	1.23353	1.25749	1.34531	0.795119	0.95002	0.770045	0.838395	1.00313	1.06749	0.939971	1.00353				#DIV/0!	0.592507	0.474743	0.996095	0.687782
Zardaverine		1.253	1.079	1.062	1.13133	1.265	1.243	1.715	1.40767	1.04482	0.982639	0.960252	0.995903	1.041	0.962	1.064	1.02233	0.665671	0.936123	0.661188	0.754327	0.936134	1.28617	0.739268	0.987189	0.926829	1.12195	0.780488	0.943089	1.1976	1.61677	1.28144	1.36527	1.08007	0.861314	0.7131	0.884828	0.923957	0.851942	0.858905	0.878268				#DIV/0!	0.712807	0.54871	0.502584	0.588034
6-Azauridine		1.055	0.924	0.802	0.927	1.289	1.209	1.5	1.33267	1.09556	1.01733	0.981584	1.03149	1.023	0.995	1.044	1.02067	1.99925	0.855435	1.14905	1.33458	1.08438	1.20523	0.947376	1.07899	2.34146	0.878049	1.02439	1.41463	1.41317	1.47305	1.43713	1.44112	0.803588	0.969076	1.05923	0.943965	0.960959	1.03685	1.00144	0.999751				#DIV/0!	1.06594	0.807326	0.582508	0.818591
Lomifylline		1.319	1.488	1.49	1.43233	1.13	1.155	1.43	1.23833	1.07241	1.19686	1.13807	1.13578	1.023	1.008	1.052	1.02767	0.499066	0.797161	0.942846	0.746358	1.32031	1.14874	1.02733	1.16546	0.731707	1.31707	1.56098	1.20325	1.50898	1.34132	1.48503	1.44511	0.892628	0.771382	1.02903	0.89768	1.02472	0.951112	0.966529	0.980786				#DIV/0!	0.798747	0.580994	0.570432	0.650058
Benztropine mesylate		1.509	1.398	1.426	1.44433	1.641	1.748	1.334	1.57433	1.16116	1.2022	1.14462	1.16933	1.06	1.071	1.08	1.07033	1.07658	0.942099	0.677624	0.898767	0.606197	0.55561	0.745591	0.635799	1.80488	1.46341	1.07317	1.44715	1.00599	0.982036	1.00599	0.998004	1.19329	0.865103	0.816738	0.958377	1.00234	0.848461	0.95698	0.935926				#DIV/0!	0.37437	0.360791	0.450236	0.395133
Rufloxacin hydrochloride		1.357	1.367	1.118	1.28067	0.674	0.894	1.441	1.003	1.13534	1.12405	1.05741	1.1056	0.985	0.987	1.022	0.998	0.549869	0.738887	1.25663	0.848462	1.53011	0.94035	0.772852	1.0811	0.829268	1.12195	1.56098	1.17073	1.04192	0.850299	1.12575	1.00599	0.693932	0.832563	0.70151	0.742668	0.906749	0.949918	0.975979	0.944215				#DIV/0!	0.691292	0.644097	0.487995	0.607795
Fluocinolone acetonide		1.018	0.906	0.772	0.898667	1.288	1.142	1.414	1.28133	1.02665	0.955883	1.0025	0.995011	1.015	1.004	1.087	1.03533	2.67464	1.7938	1.70713	2.05852	2.56573	2.67561	1.75957	2.33364	3.02439	1.80488	1.46341	2.09756	3.34132	3.08982	2.51497	2.98204	0.884716	0.872458	0.726138	0.827771	0.980852	0.91968	0.903069	0.934534				#DIV/0!	4.34817	4.72592	3.74949	4.27453
Torasemide		1.234	1.369	1.303	1.302	1.414	1.044	1.345	1.26767	1.0335	1.10295	1.12425	1.0869	1.066	1.027	1.031	1.04133	0.889802	1.53978	1.17968	1.20309	1.03843	1.38369	0.968454	1.13019	1.21951	2.34146	1.70732	1.7561	1.48503	1.46108	1.31737	1.42116	0.770491	0.938987	0.871009	0.860162	0.990103	0.985726	1.07425	1.01669				#DIV/0!	0.426735	0.877509	0.413717	0.572654
Secnidazole		1.453	1.348	1.443	1.41467	1.116	0.915	1.201	1.07733	1.14566	1.10104	1.11234	1.11968	1.013	0.983	1.041	1.01233	0.906985	0.716474	0.883078	0.835512	0.944565	1.19146	1.07483	1.07028	1.46341	1.07317	1.41463	1.31707	1.06587	1.1018	1.30539	1.15768	0.940881	0.914025	1.1281	0.994335	0.908838	0.999155	0.989208	0.965733				#DIV/0!	0.40603	0.870107	0.764769	0.680302
Clobenpropit		1.338	1.203	0.929	1.15667	1.481	1.318	1.23	1.343	1.12314	1.11178	1.03413	1.08968	1.037	1.032	1.023	1.03067	0.45947	0.584236	0.519985	0.52123	0.871777	1.11473	0.808965	0.931825	0.682927	0.780488	0.536585	0.666667	1.30539	1.48503	1.00599	1.26547	0.995487	0.786872	0.914582	0.89898	1.06639	1.02601	1.06779	1.0534				#DIV/0!	0.591036	1.16423	0.70289	0.819386
Ormetoprim		0.941	0.878	0.809	0.876	1.302	1.527	1.409	1.41267	0.998659	0.95039	0.919307	0.956119	1.051	1.048	1.077	1.05867	0.933881	1.45088	1.19462	1.19313	1.04588	1.10124	0.949624	1.03225	0.97561	1.41463	1.07317	1.15447	1.37725	1.7006	1.35329	1.47705	1.05756	1.07093	1.05321	1.06057	0.887949	0.924056	0.849356	0.887121				#DIV/0!	0.862575	0.702033	0.545392	0.703333
Levonorgestrel		1.283	1.253	1.149	1.22833	1.118	1.27	1.092	1.16	1.06793	1.03295	1.02449	1.04179	1.025	1.022	1.043	1.03	0.958536	0.911468	0.534927	0.801644	1.00667	0.923066	1.83377	1.2545	1.36585	1.26829	0.682927	1.10569	1.13772	1.18563	2.02395	1.4491	0.953586	0.968184	0.77974	0.900503	0.860297	1.0091	0.829363	0.899587				#DIV/0!	0.902065	0.527398	0.803403	0.744289
Loxapine succinate		1.25	0.888	0.98	1.03933	1.271	1.318	1.562	1.38367	1.0817	0.883064	0.949627	0.971464	1.034	1.03	1.027	1.03033	0.421367	0.741875	1.25439	0.805877	1.202	0.917024	0.773554	0.964191	0.585366	0.731707	1.36585	0.894309	1.54491	1.22156	1.22156	1.32934	0.814509	1.10369	0.91291	0.943705	1.00542	0.907843	1.01567	0.97631				#DIV/0!	0.583825	0.710558	0.501097	0.598494
Dipyridamole	5	1.196	1.188	1.248	1.21067	1.425	0.973	1.076	1.158	1.03757	1.05076	1.04211	1.04348	1.001	0.946	0.95	0.965667	1.00551	1.06552	0.913656	0.994897	0.844087	1.17257	0.855423	0.957359	1.11765	1.17647	1.05882	1.11765	1.2327	1.16981	0.943396	1.1153	1.59263	0.953957	0.980359	1.17565	0.949306	0.879382	0.731864	0.853517	1.0012	0.646258	0.894936	0.847463	0.44374	0.649689	0.541638	0.545022
Mexiletine hydrochloride		1.08	0.952	0.921	0.984333	1.078	1.207	1.699	1.328	1.04311	0.990411	0.99741	1.01031	0.961	0.98	1.015	0.985333	0.703001	1.92774	1.3068	1.31251	1.3324	1.09769	0.982645	1.13758	0.705882	1.70588	1.11765	1.17647	1.4717	1.35849	1.71069	1.51363	1.00766	1.39314	1.74306	1.38129	0.908031	0.86093	1.00369	0.924217	0.862741	1.17835	1.90012	1.31374	0.391	0.514744	1.13396	0.679901
Beclomethasone dipropionate		0.939	1.068	1.005	1.004	1.31	1.241	0.948	1.16633	0.948254	1.00301	1.04677	0.999346	0.99	1.009	1.044	1.01433	2.96632	2.31231	1.891	2.38988	2.3888	2.1464	2.73184	2.42235	2.58824	2.29412	1.76471	2.21569	3.20755	2.72956	2.65409	2.86373	1.0226	1.35579	0.996973	1.12512	0.754686	0.822473	0.822473	0.799877	6.70738	7.0927	7.63296	7.14434	8.90575	2.04526	9.87595	6.94232
Nafcillin sodium		1.23	1.269	1.094	1.19767	1.11	1.325	1.237	1.224	1.10076	1.07772	1.05166	1.07672	1.02	1.008	1.021	1.01633	1.2872	1.8959	1.09982	1.42764	0.994962	1.13926	0.942337	1.02552	1.47059	2.23529	1.11765	1.60784	1.13208	1.54717	1.19497	1.2914	1.18758	1.06575	1.13362	1.12898	0.926095	0.917257	0.839759	0.894371	1.25606	1.09937	1.08457	1.14667	1.2423	1.46806	1.01852	1.24296
Bestatin		1.155	1.087	1.066	1.10267	1.415	1.46	0.959	1.278	1.08086	1.06286	1.01409	1.05261	1.047	1.015	0.961	1.00767	1.58971	1.51378	0.891611	1.3317	0.728341	1.11798	1.50959	1.11864	1.70588	1.52941	0.882353	1.37255	1.0566	1.67296	1.48428	1.40461	1.08043	1.07979	1.19209	1.11744	1.05555	0.849859	0.907546	0.937652	1.3443	0.813248	0.859184	1.00558	0.884125	0.873649	1.36225	1.04001
Tranilast		1.24	1.173	0.897	1.10333	0.99	1.224	0.908	1.04067	1.07218	1.02676	0.942297	1.01375	0.958	0.967	0.973	0.966	1.37783	1.24189	1.13043	1.25005	1.89671	1.64423	1.73086	1.75727	1.58824	1.35294	0.941176	1.29412	1.92453	2.06289	1.61006	1.86583	0.738103	1.10104	0.971344	0.936828	0.937458	0.99359	0.839274	0.92344	3.69869	3.24286	4.02577	3.65577	1.67314	2.85775	2.21431	2.2484
Chloramphenicol		1.186	1.208	1.246	1.21333	1.401	1.582	1.571	1.518	0.990932	1.02032	1.05307	1.02144	1.041	1.008	0.967	1.00533	0.80098	1.57257	2.64299	1.67218	1.01596	0.907768	1.18712	1.03695	0.882353	1.76471	3.05882	1.90196	1.45912	1.4717	1.91195	1.61426	1.13092	1.46217	1.12937	1.24082	0.914927	0.926483	0.915704	0.919038	1.3346	3.12942	1.85941	2.10781	1.72062	1.36959	1.35084	1.48035
Azelastine hydrochloride		1.167	1.138	1.111	1.13867	1.985	1.629	1.955	1.85633	1.06499	1.01368	1.08523	1.05463	1.025	1.001	1.042	1.02267	0.977342	0.389467	0.68463	0.683813	0.686214	0.685514	0.552274	0.641334	1.05882	0.411765	0.705882	0.72549	1.39623	1.14465	1.10692	1.21593	1.14431	1.14277	0.930646	1.07257	0.993008	0.906963	0.947849	0.949273	0.719366	3.44385	0.622594	1.59527	0.559766	0.635117	0.836851	0.677245
Lofexidine hydrochloride		1.196	1.074	1.211	1.16033	1.749	1.774	1.621	1.71467	1.05815	1.0709	1.04987	1.05964	1.067	1.02	1.052	1.04633	0.582976	1.17942	0.836497	0.866299	0.863401	0.837089	0.862841	0.854444	0.647059	1.17647	0.941176	0.921569	1.54717	1.52201	1.43396	1.50105	0.820401	0.895228	1.04669	0.920772	0.82121	1.05759	0.987472	0.955424	1.11585	1.54052	1.03798	1.23145	0.975311	1.06459	0.852595	0.964165
Levosulpiride		1.179	1.147	0.902	1.076	1.9	1.097	1.282	1.42633	1.04298	1.04248	0.922766	1.00274	1.034	0.966	1.007	1.00233	1.3962	1.1586	1.40478	1.31986	1.1303	1.29783	0.871099	1.09974	1.52941	1.23529	1.17647	1.31373	2.20126	1.45912	1.14465	1.60168	1.43499	0.983193	1.19827	1.20549	0.959017	0.915995	0.949403	0.941472	0.922369	5.22985	0.811527	2.32125	0.688965	1.88396	0.903873	1.15893
Amcinonide		0.932	1.073	1.046	1.017	1.698	1.552	1.628	1.626	0.896099	0.974428	0.983906	0.951478	1.043	1.037	1.028	1.036	1.56277	2.65524	2.60257	2.27353	1.53254	1.58139	1.74094	1.61829	1.35294	2.64706	2.52941	2.17647	2.66667	2.51572	2.90566	2.69602	1.29525	1.18205	1.33544	1.27091	0.711761	0.801301	0.805283	0.772782	7.94563	10.6953	5.71287	8.11792	3.78152	5.01282	4.09806	4.29747
Montelukast sodium		1.169	1.143	1.115	1.14233	1.348	1.817	1.336	1.50033	1.00419	1.04131	1.08579	1.04376	0.994	1.015	0.996	1.00167	1.13778	0.60992	0.624617	0.790774	1.31127	0.749755	1.08369	1.04824	1.23529	0.647059	0.647059	0.843137	1.81132	1.39623	1.48428	1.56394	1.04089	1.02093	1.28688	1.11623	0.953093	0.936486	0.992911	0.96083	1.22329	1.08111	0.918026	1.07414	1.4915	1.11291	1.50388	1.36943
Mupirocin		1.195	1.21	1.095	1.16667	1.604	1.025	0.946	1.19167	1.08752	1.10506	1.09531	1.09596	1.05	0.894	0.93	0.958	1.96081	1.62278	3.297	2.29353	0.726942	1.43667	1.63429	1.26597	2.17647	1.82353	3.35294	2.45098	1.19497	1.50943	1.58491	1.42977	1.01848	1.12203	0.906562	1.01569	0.870059	1.00796	0.910071	0.929365	0.511082	0.900633	0.995955	0.802557	1.6992	1.99306	1.88826	1.86017
Diazepam		1.204	1.113	0.904	1.07367	1.839	1.321	1.506	1.55533	1.13439	1.02784	0.909166	1.0238	1.038	1.008	1.039	1.02833	1.15738	1.47949	0.840171	1.15901	0.987824	1.3289	0.904269	1.07366	1.29412	1.52941	0.705882	1.17647	1.86164	1.79874	1.39623	1.68553	1.00844	1.03922	0.75124	0.932964	0.988832	0.9192	0.900942	0.936324	3.84703	0.532177	0.519175	1.6328	1.1424	1.16926	0.662465	0.991375
Stiripentol		1.139	1.194	1.178	1.17033	1.192	1.452	1.157	1.267	1.01898	1.04042	1.0203	1.02656	1.031	1.003	0.934	0.989333	0.834048	1.48561	1.50521	1.27495	1.13282	1.37761	0.817075	1.10917	0.882353	1.64706	1.64706	1.39216	1.38365	2.05031	0.968553	1.46751	1.40099	0.99839	1.11572	1.1717	0.996795	0.94008	0.936875	0.957917	0.798281	1.32534	0.729693	0.951106	0.940298	0.883998	0.79903	0.874442
Bumetanide		1.166	1.143	1.204	1.171	1.697	1.165	1.439	1.43367	1.0216	1.03806	1.06958	1.04308	1.019	0.983	1.017	1.00633	0.597673	1.10839	0.526638	0.744234	0.795661	1.35955	0.844367	0.99986	0.647059	1.17647	0.588235	0.803922	1.38365	1.62264	1.24528	1.41719	1.30363	1.15345	1.499	1.31869	1.05001	0.935709	0.988055	0.99126	0.916957	1.67583	0.882465	1.15842	0.68671	0.368284	0.648012	0.567669
Phenothiazine		1.159	1.201	1.09	1.15	1.064	1.247	1.209	1.17333	1.08298	1.0806	1.06879	1.07746	0.981	0.963	0.973	0.972333	0.983466	0.685854	0.98714	0.885487	1.29223	1.44689	1.24843	1.32918	1.05882	0.764706	1	0.941176	1.40881	1.84906	1.54717	1.60168	1.21038	1.23678	1.26357	1.23691	0.920268	0.994173	0.890648	0.93503	0.787843	0.441131	0.495993	0.574989	1.84601	2.02394	1.45256	1.77417
5-Nonyloxytryptamine hydrochloride		0.565	0.568	0.194	0.442333	0.095	0.112	0.122	0.109667	0.803226	0.737196	0.611959	0.71746	0.93	0.884	0.922	0.912	1.00796	2.90018	1.95468	1.95428	0	0.109307	0.2014	0.103569	0.529412	1.52941	0.352941	0.803922	0	0.0125786	0.0251572	0.0125786	0.868568	2.75214	0.81512	1.47861	0	0.370108	0.44984	0.273316	0.471877	0.574342	0.764466	0.603562	0.000627906	0.00547422	0.00360124	0.00323445
Prostaglandin E1		1.207	1.301	1.374	1.294	1.553	1.604	1.636	1.59767	1.0388	1.07838	1.06715	1.06144	1.074	1.045	1.029	1.04933	0.576852	0.875689	0.875689	0.776077	0.987824	0.964171	1.02001	0.990669	0.647059	1.05882	1.11765	0.941176	1.57233	1.58491	1.71069	1.62264	0.951124	1.26331	0.997746	1.07073	0.98116	0.917452	0.9192	0.93927	1.2315	1.70628	1.56289	1.50022	1.20379	1.15347	0.896283	1.08451
Benproperine phosphate		1.33	1.174	1.209	1.23767	1.544	1.603	1.556	1.56767	1.10283	1.04154	1.08667	1.07701	1.016	1.02	1.065	1.03367	1.19045	0.592774	1.20514	0.996122	0.826592	1.03359	0.804759	0.888314	1.47059	0.647059	1.35294	1.15686	1.30818	1.69811	1.28302	1.42977	1.01694	1.44324	1.02492	1.1617	1.02476	0.877731	0.934641	0.945712	1.77166	0.825049	1.03497	1.21056	1.3229	0.355807	0.967574	0.882094
Disulfiram		0.284	0.232	0.271	0.262333	0.018	0.112	0.154	0.0946667	0.805801	0.819319	0.842643	0.822588	1.039	1.065	0.853	0.985667	10.7079	5.46724	7.23209	7.80241	0.69979	1.2028	1.90847	1.27035	2.82353	1.17647	1.82353	1.94118	0.0125786	0.138365	0.301887	0.150943	1.30182	1.2136	0.97714	1.16419	0.411285	0.645722	0.900456	0.652488	1.54042	1.50863	3.02812	2.02572	0.0484364	0.00470763	0.0497267	0.0342903
Zalcitabine		1.255	1.006	1.079	1.11333	1.025	1.245	1.224	1.16467	1.05867	1.02757	1.00539	1.03055	0.962	0.994	1.036	0.997333	1.00919	1.25903	0.704225	0.990814	1.54444	1.39958	1.51393	1.48598	1.17647	1.17647	0.705882	1.01961	1.62264	1.78616	1.89937	1.76939	1.01178	0.98886	0.923305	0.97465	0.988249	1.0035	0.959309	0.983685	1.07594	0.911963	0.516215	0.834708	2.61227	1.4665	1.3639	1.81422
Methylandrostenediol		1.167	1.099	1.36	1.20867	1.16	1.257	1.428	1.28167	1.02554	1.02431	1.07133	1.04039	0.975	0.986	1.007	0.989333	0.596448	0.807103	1.30312	0.902225	1.08957	0.878376	1.02239	0.996781	0.647059	0.823529	1.64706	1.03922	1.2956	1.13208	1.49686	1.30818	0.69148	0.961427	1.28869	0.980531	0.827425	1.02224	0.863067	0.904244	1.40436	1.41115	1.35498	1.39017	0.742863	0.531805	0.903619	0.726096
Diphenhydramine hydrochloride		1.209	1.119	1.255	1.19433	1.248	1.229	1.516	1.331	1.06734	1.06659	1.07448	1.06947	0.979	1.015	1.015	1.003	0.628291	0.961421	0.908757	0.832823	1.19986	1.20882	0.89853	1.1024	0.705882	1	1.05882	0.921569	1.53459	1.52201	1.39623	1.48428	1.17007	1.07141	0.830189	1.02389	0.993105	0.982811	0.8047	0.926872	1.12466	0.787403	0.812086	0.90805	0.824741	0.896067	0.985444	0.902084
Carvedilol		1.164	1.251	1.274	1.22967	1.359	1.414	1.317	1.36333	1.0733	1.12003	1.11792	1.10375	1.017	0.943	0.96	0.973333	1.36069	1.11329	0.497244	0.990406	1.0564	1.07656	0.997061	1.04334	1.47059	1.29412	0.588235	1.11765	1.4717	1.55975	1.34591	1.45912	0.946745	0.841522	0.757808	0.848692	0.918908	0.954064	0.934253	0.935742	1.76693	1.15146	0.879532	1.26597	3.02335	1.79935	2.14345	2.32205
Trazodone hydrochloride		1.241	0.958	1.051	1.08333	1.343	1.209	1.117	1.223	1.07585	0.982837	1.02805	1.02891	0.988	1.012	0.995	0.998333	0.867116	1.19045	1.20514	1.08757	1.29727	1.37019	1.34024	1.3359	1	1.05882	1.17647	1.07843	1.78616	1.69811	1.53459	1.67296	1.16891	1.5719	1.21978	1.3202	0.898126	0.941536	0.974847	0.93817	1.11732	0.359577	1.58758	1.02149	2.22944	1.90693	1.9722	2.03619
trans-Retinoic acid		0.915	0.871	0.949	0.911667	1.145	1.453	1.257	1.285	0.937065	0.951007	0.972538	0.953537	1.006	1.04	1.013	1.01967	1.52235	0.945499	0.934476	1.13411	0.825192	0.549055	0.780826	0.718358	1.29412	0.764706	0.823529	0.960784	0.968553	0.81761	1.00629	0.930818	1.38914	1.07618	1.67609	1.38047	0.892104	0.799165	0.888803	0.860024	0.975326	0.467869	0.675378	0.706191	0.725022	0.633759	0.773343	0.710708
Ribavirin		1.2	1.052	1.195	1.149	1.407	1.182	1.41	1.333	1.04965	1.00802	1.04069	1.03279	1.001	0.977	1.035	1.00433	1.00306	0.602572	1.11329	0.906307	1.16851	1.44325	1.00966	1.20714	1.11765	0.588235	1.23529	0.980392	1.68553	1.74843	1.45912	1.63103	1.11417	1.11997	0.842295	1.02548	0.996892	1.01175	1.07245	1.02703	0.337353	0.760802	0.508421	0.535525	1.34014	1.60551	1.73646	1.56071
Cisapride hydrate	6	1.032	1.166	1.237	1.145	0.996	1.271	1.04	1.10233	0.995765	1.0272	1.14507	1.05601	1.059	1.022	0.977	1.01933	1.21698	2.09205	0.845188	1.38474	0.721592	0.844435	1.00524	0.85709	1.28571	2.5	1.07143	1.61905	0.806283	1.20419	1.17277	1.06108	0.868011	0.799152	0.945119	0.870761	1.07997	0.810683	0.888643	0.926433				#DIV/0!	0	0	0	0
Ethambutol		1.258	1.303	1.086	1.21567	1.026	1.273	0.987	1.09533	1.12331	1.12616	1.06035	1.10328	1.031	1.074	1.065	1.05667	1.16438	1.06993	1.41303	1.21578	1.44614	0.872526	1.17287	1.16384	1.5	1.42857	1.57143	1.5	1.66492	1.24607	1.29843	1.40314	1.09876	0.629354	1.07275	0.933624	0.905442	0.954632	0.963887	0.94132				#DIV/0!	0	0	0	0
Riluzole hydrochloride		1.267	1.071	1.288	1.20867	1.767	1.664	1.608	1.67967	1.0848	1.08178	1.08911	1.08523	1.052	0.988	1.005	1.015	1.54094	0.780634	0.75792	1.0265	0.607399	0.779909	0.598036	0.661781	2	0.857143	1	1.28571	1.20419	1.4555	1.07853	1.24607	1.13451	1.10461	0.73797	0.992362	1.12453	1.06307	1.07394	1.08718				#DIV/0!	0	0	0	0
Glipizide		0.866	1.209	0.981	1.01867	1.412	1.284	1.416	1.37067	0.971664	1.05857	0.986122	1.00545	1.003	0.999	1.037	1.013	1.44889	0.634788	0.63957	0.907751	0.832731	0.734212	0.810748	0.792564	1.28571	0.785714	0.642857	0.904762	1.31937	1.05759	1.28796	1.22164	1.02269	1.24599	0.793309	1.02066	1.03752	0.934715	0.921336	0.964524				#DIV/0!	0	0	0	0
Trihexyphenidyl hydrochloride		1.146	1.236	1.367	1.24967	1.623	1.841	1.67	1.71133	1.03022	1.1045	1.13122	1.08865	1.026	1.033	1.02	1.02633	1.09504	1.80395	1.32576	1.40825	0.753244	0.56791	0.542161	0.621105	1.28571	2.28571	1.85714	1.80952	1.37173	1.17277	1.01571	1.18674	1.21563	1.23774	1.29445	1.24927	1.04627	0.948396	0.941656	0.978775				#DIV/0!	0	0	0	0
Busulfan		1.323	1.273	1.121	1.239	1.036	1.155	1.12	1.10367	1.15412	1.12616	1.1224	1.13422	0.97	1.004	0.979	0.984333	1.42259	1.04124	1.3688	1.27755	1.33296	1.12371	1.25866	1.23844	1.92857	1.35714	1.57143	1.61905	1.54974	1.4555	1.58115	1.5288	1.01341	0.901696	0.881531	0.932211	0.764812	0.919525	0.982497	0.888945				#DIV/0!	0	0	0	0
Trimethoprim		1.17	1.151	1.261	1.194	1.189	1.248	1.815	1.41733	1.05831	1.09267	1.05067	1.06722	0.99	0.956	1.042	0.996	1.84698	1.3939	0.995816	1.41223	1.03577	1.46568	0.951402	1.15095	2.21429	1.64286	1.28571	1.71429	1.3822	2.05236	1.93717	1.79058	0.997938	0.952566	1.16831	1.0396	0.951413	1.00563	0.893069	0.950039				#DIV/0!	0	0	0	0
Flumadine hydrochloride		0.932	1.043	0.928	0.967667	1.526	1.625	1.149	1.43333	1.04421	0.987594	1.00032	1.01071	1.018	1.03	0.986	1.01133	2.16975	1.13688	1.20263	1.50309	1.13155	0.700728	1.30772	1.04666	2.07143	1.21429	1.14286	1.47619	1.93717	1.27749	1.68586	1.63351	1.21276	1.08902	0.915445	1.07241	0.930691	1.00433	0.855045	0.93002				#DIV/0!	0	0	0	0
Cytarabine		1.09	1.099	1.179	1.12267	1.145	1.251	1.211	1.20233	1.03651	1.00399	1.15522	1.06524	0.996	0.984	0.983	0.987667	1.34369	1.77645	1.24208	1.45407	1.16523	0.798433	0.863569	0.942412	1.5	2	1.5	1.66667	1.49738	1.12042	1.17277	1.26353	0.694088	1.09086	1.22995	1.00496	0.893371	0.964993	0.833618	0.897328				#DIV/0!	0	0	0	0
(-)-Cotinine		1.25	1.153	1.179	1.194	1.228	1.248	0.869	1.115	1.09347	1.06877	1.14093	1.10106	0.982	0.939	1.014	0.978333	1.05918	1.02809	3.01733	1.70153	1.01847	0.987125	1.04137	1.01566	1.35714	1.21429	3.64286	2.07143	1.40314	1.3822	1.01571	1.26702	1.29801	0.896884	0.890582	1.02849	1.07524	1.15039	0.97284	1.06616				#DIV/0!	0	0	0	0
Sotalol hydrochloride		1.138	1.183	1.239	1.18667	1.267	1.041	1.427	1.245	1.13207	1.14347	1.14279	1.13944	1.025	0.978	1.019	1.00733	1.10341	1.76808	0.619247	1.16358	0.943362	1.12982	0.811053	0.96141	1.28571	2.14286	0.785714	1.40476	1.34031	1.31937	1.29843	1.31937	1.40903	0.990605	0.864115	1.08792	1.12524	1.01217	0.984207	1.04054				#DIV/0!	0	0	0	0
3,5,3'-Triiodothyronine		1.324	1.054	0.825	1.06767	1.141	1.77	1.264	1.39167	1.07824	1.1181	0.934577	1.04364	0.978	1.063	0.995	1.012	1.9474	1.65332	1.35326	1.65132	1.27627	0.748868	1.41072	1.14529	2.64286	1.78571	1.14286	1.85714	1.63351	1.48691	2	1.70681	1.12603	0.890582	1.35289	1.12317	0.970928	0.837139	0.838547	0.882205				#DIV/0!	0	0	0	0
Lorazepam		1.195	1.425	1.454	1.358	1.514	1.615	1.389	1.506	1.00542	1.14806	1.17306	1.10885	1.074	1.062	1.03	1.05533	0.583383	0.734011	0.622833	0.646742	0.63498	0.797517	0.732278	0.721592	0.714286	1.07143	0.928571	0.904762	1.07853	1.44503	1.14136	1.22164	1.33032	0.938932	0.959212	1.07615	0.900111	0.911075	0.937632	0.916273				#DIV/0!	0	0	0	0
Goserelin acetate		1.222	1.229	1.103	1.18467	1.231	1.381	1.358	1.32333	1.17305	1.17302	1.07601	1.14069	0.997	0.993	1.036	1.00867	1.42618	2.43993	1.51584	1.79398	0.925246	1.02051	0.989568	0.97844	1.78571	3.07143	1.71429	2.19048	1.27749	1.58115	1.50785	1.4555	0.857585	0.912351	0.970784	0.913573	1.0174	1.01589	0.91691	0.983402				#DIV/0!	0	0	0	0
Famotidine		1.057	0.9	1.019	0.992	1.264	1.141	1.331	1.24533	1.02677	1.06384	1.09581	1.06214	0.991	1.025	1.036	1.01733	2.04423	1.85894	1.30066	1.73461	0.915882	0.981731	0.799654	0.899089	2.21429	1.71429	1.35714	1.7619	1.29843	1.25654	1.19372	1.24956	1.04239	0.794913	1.16648	1.00126	0.944171	0.897797	0.992556	0.944841				#DIV/0!	0	0	0	0
Glycopyrronium bromide		0.829	1.003	0.932	0.921333	0.93	1.233	1.148	1.10367	1.01069	1.01832	0.97985	1.00296	0.983	0.984	1.042	1.003	1.76569	1.18111	0.448296	1.1317	1.44532	0.945906	1.2437	1.21164	1.5	1.21429	0.428571	1.04762	1.50785	1.3089	1.60209	1.47295	1.17656	0.792851	0.676329	0.881913	0.987526	0.925863	1.04416	0.98585				#DIV/0!	0	0	0	0
Mesoridazine besylate		1.202	1.226	1.189	1.20567	1.124	1.441	1.751	1.43867	1.04808	1.0686	1.14053	1.08574	1.029	0.998	1.024	1.017	1.21817	1.4214	1.23132	1.2903	0.780317	0.803318	0.645056	0.742897	1.5	1.78571	1.5	1.59524	0.984293	1.29843	1.26702	1.18325	1.40135	1.06038	0.770967	1.07757	0.850317	0.925561	0.979982	0.91862				#DIV/0!	0	0	0	0
Diphenylcyclopropenone		0.769	0.696	0.751	0.738667	0.344	0.515	0.166	0.341667	0.981308	0.898589	0.965007	0.948301	0.961	0.929	1.015	0.968333	2.71847	1.90197	2.22714	2.28253	1.9541	1.3582	1.46201	1.59144	2.14286	1.35714	1.71429	1.7381	0.753927	0.78534	0.272251	0.603839	1.28609	0.99874	0.864459	1.04976	0.919827	0.812192	0.91188	0.8813				#DIV/0!	0	0	0	0
Tramadol hydrochloride		1.019	1.069	1.175	1.08767	1.15	1.136	1.473	1.253	1.0772	1.10987	1.15355	1.11354	1.07	1.011	1.044	1.04167	1.43574	1.69516	0.949193	1.36003	1.03883	1.19108	0.709786	0.979899	1.5	1.85714	1.14286	1.5	1.34031	1.51832	1.17277	1.3438	0.877979	1.22411	1.15685	1.08631	0.992254	0.964088	0.930188	0.962177				#DIV/0!	0	0	0	0
Calcitriol		0.839	0.928	0.762	0.843	1.155	1.015	1.143	1.10433	0.994794	1.06587	0.960807	1.00716	1.025	0.991	1.022	1.01267	1.82785	1.27794	0.914525	1.34011	1.12371	1.30548	1.0945	1.17456	1.57143	1.21429	0.714286	1.16667	1.4555	1.48691	1.40314	1.44852	0.925412	1.13027	0.929193	0.994959	0.846595	0.942561	0.939342	0.909499				#DIV/0!	0	0	0	0
Gatifloxacin		1.14	1.162	1.179	1.16033	1.084	1.402	1.194	1.22667	1.06307	1.1518	1.09799	1.10429	1.033	1.013	1.022	1.02267	1.16198	1.38075	1.89241	1.47838	1.20543	1.33795	1.05532	1.19957	1.35714	1.64286	2.28571	1.7619	1.46597	2.10471	1.41361	1.66143	1.42003	0.998167	0.858158	1.09212	0.936324	1.00583	1.04476	0.995641				#DIV/0!	0	0	0	0
Tibolone		1.106	1.105	1.094	1.10167	1.3	1.248	1.235	1.261	1.11443	1.08336	1.0791	1.09229	1.045	0.993	1.056	1.03133	1.13449	1.32457	0.765093	1.07472	1.14915	1.06193	0.763116	0.9914	1.28571	1.5	0.857143	1.21429	1.67539	1.48691	1.05759	1.40663	0.937786	0.866178	0.824358	0.876108	0.958254	0.939946	0.926869	0.941689				#DIV/0!	0	0	0	0
Metronidazole		0.98	1.127	0.909	1.00533	1.111	1.075	1.054	1.08	1.1021	1.13302	1.0536	1.09624	1.007	0.991	0.965	0.987667	0.711297	1.36043	1.841	1.30424	0.747952	1.60653	0.894611	1.08303	0.714286	1.57143	1.71429	1.33333	0.931937	1.93717	1.05759	1.3089	0.790674	1.01902	0.826994	0.878896	0.859974	1.03018	0.896892	0.929015				#DIV/0!	0	0	0	0
Oligomycin A		0.849	0.857	0.646	0.784	1.071	1.355	1.527	1.31767	0.958649	0.953078	0.845844	0.91919	0.973	1.038	1.05	1.02033	0.656306	1.54573	0.970711	1.05758	0.644853	0.550913	0.629586	0.608451	0.571429	1.35714	0.642857	0.857143	0.774869	0.837696	1.07853	0.897033	1.00011	0.956691	0.951764	0.969523	0.834825	0.793985	0.790564	0.806458				#DIV/0!	0	0	0	0
					#DIV/0!	#N/A	#N/A	#N/A	#N/A				#DIV/0!	#N/A	#N/A	#N/A	#N/A				#DIV/0!	#N/A	#N/A	#N/A	#N/A				#DIV/0!	#N/A	#N/A	#N/A	#N/A				#DIV/0!	#N/A	#N/A	#N/A	#N/A				#DIV/0!	#N/A	#N/A	#N/A	#N/A
					#DIV/0!	#N/A	#N/A	#N/A	#N/A				#DIV/0!	#N/A	#N/A	#N/A	#N/A				#DIV/0!	#N/A	#N/A	#N/A	#N/A				#DIV/0!	#N/A	#N/A	#N/A	#N/A				#DIV/0!	#N/A	#N/A	#N/A	#N/A				#DIV/0!	#N/A	#N/A	#N/A	#N/A
					#DIV/0!	#N/A	#N/A	#N/A	#N/A				#DIV/0!	#N/A	#N/A	#N/A	#N/A				#DIV/0!	#N/A	#N/A	#N/A	#N/A				#DIV/0!	#N/A	#N/A	#N/A	#N/A				#DIV/0!	#N/A	#N/A	#N/A	#N/A				#DIV/0!	#N/A	#N/A	#N/A	#N/A
					#DIV/0!	#N/A	#N/A	#N/A	#N/A				#DIV/0!	#N/A	#N/A	#N/A	#N/A				#DIV/0!	#N/A	#N/A	#N/A	#N/A				#DIV/0!	#N/A	#N/A	#N/A	#N/A				#DIV/0!	#N/A	#N/A	#N/A	#N/A				#DIV/0!	#N/A	#N/A	#N/A	#N/A
Ebselen	16	1.049	0.881	1.187	1.039	1.449	0.825	0.887	1.05367	0.973767	0.899353	0.965194	0.946105	0.986	0.974	0.942	0.967333	0.722371	1.20342	0.670048	0.865279	0.700985	1.20684	0.997771	0.968533	0.754717	1.0566	0.792453	0.867925	1.05759	1.03665	0.921466	1.00524	1.01392	1.0164	0.916484	0.98227	1.08961	0.911049	0.956208	0.985621				#DIV/0!	0	0	0	0
Taxifolin-(+/-)		0.918	1.159	1.254	1.11033	0.645	0.995	0.873	0.837667	0.89387	0.989578	1.01252	0.965322	0.962	1.017	0.977	0.985333	1.32034	1.01335	0.513615	0.949101	1.10689	0.626728	0.829071	0.854228	1.20755	1.16981	0.641509	1.00629	0.743455	0.649215	0.753927	0.715532	0.992245	1.20988	1.10728	1.10314	1.02367	0.917719	1.03406	0.991817				#DIV/0!	0	0	0	0
Naphazoline hydrochloride		1.148	1.161	1.304	1.20433	0.689	0.975	0.819	0.827667	1.01063	0.998043	1.0506	1.01976	1.019	1.042	1.014	1.025	1.22104	1.14202	0.639082	1.00071	1.19776	0.886952	1.24057	1.10843	1.39623	1.32075	0.830189	1.18239	0.858639	0.900524	1.05759	0.938918	1.11205	0.745277	0.88626	0.914529	0.925811	1.05341	1.14329	1.04084				#DIV/0!	0	0	0	0
Chlordiazepoxide		1.293	1.323	1.302	1.306	0.859	1.201	0.975	1.01167	1.06444	1.06569	1.04379	1.05797	1.029	1.047	1.027	1.03433	0.586225	1.08809	0.75654	0.810287	1.21835	1.03847	0.866361	1.04106	0.754717	1.43396	0.981132	1.0566	1.08901	1.29843	0.879581	1.08901	0.931597	1.09813	0.88974	0.973156	0.973156	0.993603	0.981248	0.982669				#DIV/0!	0	0	0	0
Lobeline hydrochloride		1.417	1.27	1.528	1.405	1.254	0.608	1.424	1.09533	1.06869	1.00824	1.05109	1.04267	0.992	0.892	1	0.961333	0.641751	0.715964	0.619861	0.659192	0.665559	1.27388	0.875603	0.938349	0.90566	0.90566	0.943396	0.918239	0.86911	0.806283	1.29843	0.991274	0.861603	1.018	1.17339	1.01766	1.07572	1.05298	1.12449	1.08439				#DIV/0!	0	0	0	0
Felbamate		1.428	1.24	1.103	1.257	0.706	0.937	0.908	0.850333	1.04348	1.03728	1.02297	1.03457	0.932	1.01	1.053	0.998333	0.769354	1.06887	1.0299	0.956042	1.36776	1.42807	0.852742	1.21619	1.09434	1.32075	1.13208	1.18239	1.00524	1.39267	0.806283	1.06806	0.943229	1.07586	1.00239	1.00716	0.962003	0.993385	1.02509	0.993494				#DIV/0!	0	0	0	0
Digoxin		0.199	0.27	0.292	0.253667	0.223	0.172	0.236	0.210333	0.967022	0.956212	0.915669	0.946301	1.003	1.034	1.065	1.034	0.190069	0.560598	0.909237	0.553301	0.0900653	0.0582871	0.128005	0.092119	0.0377358	0.150943	0.264151	0.150943	0.0209424	0.0104712	0.0314136	0.0209424	1.06154	0.376119	0.877113	0.771591	0.374938	0.572413	0.542343	0.496565				#DIV/0!	0	0	0	0
Pinacidil monohydrate		1.303	1.283	1.524	1.37	0.847	1.295	1.115	1.08567	1.02554	1.078	1.0848	1.06278	0.938	0.975	0.97	0.961	0.407368	0.827015	0.720769	0.651717	0.913948	0.830854	0.757489	0.834097	0.528302	1.0566	1.09434	0.893082	0.806283	1.12042	0.879581	0.935428	1.07904	1.02426	1.04414	1.04915	0.830026	1.06326	0.886666	0.926649				#DIV/0!	0	0	0	0
Rutin		1.355	1.46	1.219	1.34467	1.345	0.498	0.546	0.796333	1.06135	1.03702	0.993101	1.03049	1.059	0.969	0.972	1	0.922584	0.518954	1.18099	0.874177	0.628187	1.25337	1.12391	1.00182	1.24528	0.754717	1.43396	1.14465	0.879581	0.649215	0.638743	0.722513	0.794492	0.977033	0.824816	0.865447	0.900115	1.11432	0.98923	1.00122				#DIV/0!	0	0	0	0
Naftopidil		1.361	1.09	1.134	1.195	1.351	0.674	0.808	0.944333	1.04823	1.00666	0.978144	1.01101	1.02	0.925	0.957	0.967333	0.806727	1.77256	0.668446	1.08258	0.856066	1.40335	1.28264	1.18068	1.09434	1.92453	0.754717	1.25786	1.20419	0.984293	1.07853	1.08901	0.852456	0.936866	0.897992	0.895771	0.847302	0.982013	1.12952	0.986277				#DIV/0!	0	0	0	0
CCPA		1.3	1.254	1.183	1.24567	1.246	0.588	0.665	0.833	1.01072	1.04518	1.05243	1.03611	0.968	0.944	0.871	0.927667	0.641217	0.876135	1.1842	0.900516	1.00126	1.11167	1.10405	1.07233	0.830189	1.09434	1.39623	1.10692	1.29843	0.680628	0.764398	0.914485	0.922251	0.977928	1.15341	1.01786	0.993275	0.981248	0.927013	0.967179				#DIV/0!	0	0	0	0
Oxaprozin		1.079	1.147	1.229	1.15167	0.514	0.801	1.117	0.810667	1.02054	1.07297	1.08573	1.05975	0.903	0.949	1.006	0.952667	0.91244	1.55206	1.29471	1.25307	1.684	0.865875	0.900734	1.1502	0.981132	1.77358	1.58491	1.44654	0.900524	0.722513	1.04712	0.890052	1.0007	1.00129	0.960231	0.987406	1.05812	1.10929	1.01318	1.06019				#DIV/0!	0	0	0	0
Corticosterone		1.113	1.493	1.384	1.33	1.849	0.989	0.862	1.23333	1.05752	1.05264	1.05261	1.05426	1.003	0.983	0.97	0.985333	1.46343	1.06567	1.04004	1.18971	0.946699	1.85124	1.91293	1.57029	1.62264	1.58491	1.43396	1.54717	1.82199	1.90576	1.71728	1.81501	1.00537	1.11483	0.8449	0.988367	1.11388	1.09562	1.03504	1.08152				#DIV/0!	0	0	0	0
CGS 12066B dimaleate		1.471	0.996	1.09	1.18567	1.177	1.422	1.758	1.45233	1.05163	1.03794	1.0068	1.03212	0.938	0.904	0.98	0.940667	0.566471	1.48318	0.729311	0.926321	0.879899	0.700336	0.509181	0.696472	0.830189	1.4717	0.792453	1.03145	1.07853	1.03665	0.931937	1.01571	0.75353	0.854544	0.863989	0.824021	1.04729	0.999945	1.01667	1.0213				#DIV/0!	0	0	0	0
Edrophonium chloride		1.141	1.27	1.007	1.13933	0.923	0.733	1.047	0.901	1.02291	1.05794	1.0347	1.03852	0.96	0.953	0.993	0.968667	0.929525	0.954618	1.20342	1.02919	0.904382	1.06992	0.806858	0.927053	1.0566	1.20755	1.20755	1.15723	0.86911	0.816754	0.879581	0.855148	1.18035	0.900776	0.982104	1.02108	1.10524	0.950303	1.05505	1.03687				#DIV/0!	0	0	0	0
Etoposide		0.878	0.661	0.605	0.714667	0.531	0.5	0.596	0.542333	0.980921	0.976592	0.942999	0.966837	0.836	0.856	0.853	0.848333	1.07795	2.40577	2.1906	1.89144	1.55316	1.30753	1.1822	1.34763	0.943396	1.58491	1.32075	1.28302	0.858639	0.680628	0.732984	0.757417	0.923345	0.91032	0.918274	0.917313	1.12143	1.1843	1.10929	1.13834				#DIV/0!	0	0	0	0
Letrozole		0.95	1.03	1.034	1.00467	1.375	0.697	0.72	0.930667	1.03624	1.02929	1.0142	1.02658	1.009	0.97	0.932	0.970333	1.47517	1.58089	1.39242	1.48283	0.965749	1.55786	1.16007	1.22789	1.39623	1.62264	1.43396	1.48428	1.3822	1.13089	0.86911	1.1274	1.15888	0.854544	0.959137	0.990853	1.06249	1.02586	0.901208	0.996519				#DIV/0!	0	0	0	0
Atracurium besylate		1.054	0.873	0.716	0.881	0.666	0.597	0.504	0.589	1.021	1.02347	0.950922	0.998463	0.91	0.932	0.912	0.918	1.11479	2.12707	1.21676	1.48621	1.52471	1.87078	1.77707	1.72418	1.16981	1.84906	0.867925	1.2956	1.05759	1.1623	0.931937	1.05061	1.17986	1.13551	1.18831	1.16789	0.979061	1.11607	1.10885	1.06799				#DIV/0!	0	0	0	0
Repaglinide		0.844	1.1	0.998	0.980667	0.897	0.712	0.671	0.76	0.980079	1.03879	1.06991	1.02959	0.926	0.994	0.905	0.941667	1.30112	1.30806	1.9354	1.51486	1.06522	0.918001	1.54343	1.17555	1.09434	1.43396	1.92453	1.48428	0.994764	0.680628	1.07853	0.917976	0.876119	1.05776	0.983595	0.972493	0.923077	1.01449	0.888852	0.942139				#DIV/0!	0	0	0	0
Clomifene citrate		1.016	1.032	1.002	1.01667	1.301	1.481	2.164	1.64867	0.987414	1.07427	1.04493	1.03554	0.948	0.932	1.022	0.967333	1.00641	1.61452	0.982381	1.2011	0.749625	0.549957	0.548498	0.616027	1.01887	1.66038	0.981132	1.22013	1.01571	0.848168	1.2356	1.03316	1.19606	0.861205	0.936071	0.99778	1.14712	0.992838	1.05921	1.06639				#DIV/0!	0	0	0	0
Fluphenazine dihydrochloride		1.117	1.098	1.242	1.15233	1.663	1.203	1.589	1.485	1.03201	1.03925	1.06022	1.04382	0.998	0.902	1.001	0.967	1.08542	1.27603	0.457555	0.939669	0.62916	0.894248	0.537878	0.687096	1.20755	1.39623	0.566038	1.0566	1.08901	1.12042	0.890052	1.03316	1.00557	0.832173	0.844204	0.893982	0.987808	1.04707	0.883167	0.972682				#DIV/0!	0	0	0	0
Nimetazepam		0.979	1.087	0.958	1.008	0.546	0.676	0.864	0.695333	1.00894	1.04303	0.990384	1.01412	0.951	0.914	0.976	0.947	1.31554	1.46396	0.672184	1.15056	1.1976	1.35357	1.23465	1.26194	1.28302	1.58491	0.641509	1.16981	0.680628	0.95288	1.10995	0.914485	0.994432	1.02446	0.951183	0.990025	0.886119	1.02138	1.16855	1.02535				#DIV/0!	0	0	0	0
3-Pyridinemethanol		0.851	1.178	1.203	1.07733	0.804	0.867	1.182	0.951	0.960685	1.03659	1.06191	1.01973	0.958	0.939	1.004	0.967	1.20235	1.06086	1.13401	1.13241	1.41364	0.88144	1.02931	1.10813	1.01887	1.24528	1.35849	1.20755	1.18325	0.795812	1.26702	1.08202	1.07447	0.793299	1.10151	0.989759	1.12492	0.935979	0.935214	0.998706				#DIV/0!	0	0	0	0
Ursodeoxycholic acid		1.16	1.2	1.271	1.21033	0.985	1.072	0.953	1.00333	1.01999	1.06726	1.06272	1.04999	0.979	0.934	1.005	0.972667	0.718633	1.32621	0.805125	0.949991	0.775972	1.09781	0.876089	0.916623	0.830189	1.58491	1.01887	1.14465	0.795812	1.22513	0.86911	0.963351	1.19169	0.790913	0.84311	0.941904	0.871795	1.05385	1.01908	0.981576				#DIV/0!	0	0	0	0
Tetracycline		0.993	1.118	0.944	1.01833	0.831	0.702	0.658	0.730333	1.02716	1.01697	0.970196	1.00478	1.038	1.014	0.981	1.011	1.10571	1.11799	1.32355	1.18242	0.810668	0.802075	0.841231	0.817991	1.09434	1.24528	1.24528	1.19497	0.701571	0.586387	0.575916	0.621291	0.906144	0.958242	1.01919	0.961192	1.24148	1.00826	0.883713	1.04448				#DIV/0!	0	0	0	0
Cefixime trihydrate		1.023	0.844	0.465	0.777333	0.266	0.247	0.318	0.277	1.07312	1.05168	0.963727	1.02951	0.967	0.913	0.984	0.954667	1.5921	1.43673	2.60812	1.87898	1.5153	1.67022	1.29837	1.49463	1.62264	1.20755	1.20755	1.34591	0.418848	0.429319	0.429319	0.425829	0.999801	0.773613	0.846689	0.873368	1.06511	0.859439	1.00771	0.977421				#DIV/0!	0	0	0	0
RU-486		0.955	0.993	1.129	1.02567	1.289	0.988	0.566	0.947667	1.01567	1.03059	1.04668	1.03098	0.988	0.971	0.989	0.982667	1.26909	1.5638	1.24186	1.35825	1.08451	1.21195	1.06668	1.12105	1.20755	1.54717	1.39623	1.38365	1.4555	1.24607	0.628272	1.10995	1.0168	1.14923	1.15898	1.10834	0.918594	1.04543	0.850254	0.938093				#DIV/0!	0	0	0	0
3'-Deoxydenosine		1.029	0.873	0.989	0.963667	0.953	0.886	1.361	1.06667	1.02751	1.0285	1.01605	1.02402	0.984	0.968	1.015	0.989	0.846236	2.08169	1.30219	1.41004	0.781079	0.97645	0.783349	0.846959	0.867925	1.81132	1.28302	1.32075	0.774869	0.900524	1.10995	0.928447	0.941042	1.17618	0.9483	1.02184	1.06828	1.04007	1.16123	1.08986				#DIV/0!	0	0	0	0
Ibuprofen	17	0.805	0.925	0.748	0.826	1.071	0.906	1.607	1.19467	0.935507	0.920621	0.959751	0.938627	0.998	1.012	1.033	1.01433	0.788901	0.741482	1.1549	0.895094	1.23619	1.41328	0.934009	1.19449	0.657895	0.710526	0.894737	0.754386	1.36364	1.31818	1.54545	1.40909	1.30434	0.981019	1.2337	1.17302	1.05857	1.39703	1.16415	1.20658				#DIV/0!	0.729571	0.556264	0.17825	0.488028
Estrone 3-sulfate sodium salt		0.641	0.756	0.836	0.744333	1.198	1.368	1.215	1.26033	0.844394	0.915557	0.942963	0.900971	0.969	0.983	1.002	0.984667	0.753073	0.80576	1.39761	0.985482	1.03213	1.06538	1.12631	1.07461	0.5	0.631579	1.21053	0.780702	1.27273	1.5	1.40909	1.39394	0.969163	0.848005	0.906292	0.90782	0.968559	0.98309	1.16415	1.0386				#DIV/0!	0.228444	0.19763	0.183609	0.203228
Mestranol		1.217	1.242	1.106	1.18833	1.224	2.195	1.62	1.67967	0.942513	0.987491	1.02417	0.984723	0.932	1.007	0.99	0.976333	0.66772	0.818405	1.0562	0.847442	1.15438	1.00568	1.38976	1.18327	0.842105	1.05263	1.21053	1.03509	1.45455	2.27273	2.31818	2.01515	1.08464	0.99168	1.04	1.03878	1.32257	1.0578	1.1293	1.16989				#DIV/0!	1.81569	0.297254	0.0663465	0.72643
Zucapsaicin		1.057	0.905	0.996	0.986	1.32	1.803	0.814	1.31233	0.975961	0.997981	0.985087	0.986343	1.053	0.988	0.963	1.00133	0.76888	1.62733	1.12153	1.17258	0.970198	1.1998	1.08414	1.08471	0.842105	1.52632	1.15789	1.17544	1.31818	2.22727	0.909091	1.48485	0.92044	0.753749	1.07986	0.918016	1.18755	1.20928	0.910178	1.10234				#DIV/0!	0.261017	0.210914	0.227798	0.233243
Zacopride hydrochloride hydrate		0.981	0.986	0.936	0.967667	1.49	1.25	1.202	1.314	0.974521	1.00253	0.930095	0.969049	1.043	0.937	0.928	0.969333	0.958553	1.10818	0.650861	0.905866	1.09671	1.09488	0.697821	0.963136	0.973684	1.13158	0.631579	0.912281	1.68182	1.40909	0.863636	1.31818	1.05615	0.746276	0.857072	0.886498	1.21893	0.989134	1.31987	1.17598				#DIV/0!	0.96688	0.926468	2.02226	1.3052
Deferiprone		0.939	0.863	1.195	0.999	1.86	1.855	2.195	1.97	0.947025	0.884963	1.01562	0.949202	0.904	0.958	0.946	0.936	0.622058	1.32385	0.74359	0.896499	0.925798	0.737658	0.844703	0.836053	0.605263	1.18421	0.921053	0.903509	1.77273	1.40909	1.90909	1.69697	1.10417	1.09729	1.07388	1.09178	1.23217	1.15695	0.981676	1.1236				#DIV/0!	0.160658	0.0312361	0.0918619	0.0945855
Bicalutamide		1.26	1.271	1.313	1.28133	2.369	3.489	2.33	2.72933	0.948966	1.02149	1.07877	1.01641	0.935	0.997	0.957	0.963	0.62522	0.759396	0.676853	0.687156	0.83852	0.822605	0.909478	0.856868	0.815789	1	0.921053	0.912281	2.04545	2.95455	2.18182	2.39394	1.08633	1.14681	1.07697	1.10337	1.16402	0.846396	1.13907	1.04983				#DIV/0!	0.134388	0.161912	0.0816845	0.125995
Crotamiton		0.954	0.755	0.868	0.859	1.389	1.341	0.601	1.11033	1.00089	0.950547	0.977207	0.976213	0.953	0.983	1.076	1.004	1.70425	1.17738	1.40393	1.42852	1.55712	0.493664	1.24876	1.09985	1.68421	0.921053	1.26316	1.28947	2.22727	0.681818	0.772727	1.22727	0.886464	1.09759	0.976934	0.986997	1.28297	1.58516	0.882016	1.25005				#DIV/0!	0.13372	0.106627	0.298986	0.179777
Aminolevulinic acid		0.851	0.889	0.884	0.874667	1.032	1.89	1.52	1.48067	0.917408	0.93327	0.932011	0.927563	0.992	0.924	0.858	0.924667	1.10432	1.19951	1.46575	1.25653	2.30968	1.5182	0.987532	1.60514	0.973684	1.10526	1.34211	1.14035	2.45455	2.95455	1.54545	2.31818	0.907787	0.883774	0.933792	0.908451	0.887932	1.14885	1.04237	1.02638				#DIV/0!	1.42776	1.23338	0.49873	1.05329
Ethynylestradiol		1.044	0.936	1.216	1.06533	1.564	1.694	2.226	1.828	0.949853	0.921161	1.02256	0.964524	0.925	0.902	0.929	0.918667	1.11907	0.786442	0.730945	0.87882	1.44004	0.755702	1.05139	1.08238	1.21053	0.763158	0.921053	0.964912	2.31818	1.31818	2.40909	2.01515	1.16814	1.20092	0.95352	1.10752	1.05574	1.23938	1.21931	1.17148				#DIV/0!	0.252349	0.118965	0.18534	0.185552
Lomerizine dihydrochloride		1.156	1.219	1.046	1.14033	3.576	4.508	3.58	3.888	0.959879	1.0087	0.99388	0.987487	0.937	0.981	0.96	0.959333	0.505093	0.583421	1.06884	0.71912	0.889002	0.656158	0.863254	0.802805	0.605263	0.736842	1.15789	0.833333	3.27273	3.04545	3.18182	3.16667	1.20271	0.994669	1.0682	1.08853	1.11503	1.17804	1.16351	1.15219				#DIV/0!	0.120828	0.0695144	0.121913	0.104085
Cladribine		0.925	0.718	0.654	0.765667	1.777	1.28	1.102	1.38633	0.953799	1.02914	0.857917	0.946952	1.046	1.002	1.021	1.023	1.07095	2.44081	1.31963	1.61047	1.01865	1.03436	1.5626	1.2052	1.02632	1.81579	0.894737	1.24561	1.86364	1.36364	1.77273	1.66667	0.877298	0.741792	0.904299	0.84113	1.1599	1.07542	1.27345	1.16959				#DIV/0!	0.166145	0.088667	0.19478	0.149864
Flumazenil		1.06	1.114	1.097	1.09033	1.01	1.551	1.254	1.27167	1.00136	0.980987	1.00414	0.995495	1.003	0.936	0.897	0.945333	1.05409	0.72954	0.717949	0.83386	1.3108	1.30978	1.51353	1.37804	1.15789	0.842105	0.815789	0.938596	1.36364	2.09091	1.95455	1.80303	1.07727	1.03701	0.933592	1.01596	1.37723	1.26342	1.12981	1.25682				#DIV/0!	0.977698	0.88376	0.65012	0.837192
Nortriptyline hydrochloride		1.153	1.385	1.207	1.24833	2.539	2.139	2.47	2.38267	1.00482	1.00636	0.997402	1.00286	0.868	0.845	0.808	0.840333	0.661047	0.531788	0.484018	0.558951	0.95631	0.970299	0.822402	0.916337	0.789474	0.763158	0.605263	0.719298	2.5	2.13636	2.09091	2.24242	0.906192	1.12908	0.953918	0.996396	1.10178	1.05369	1.22472	1.12673				#DIV/0!	0.210431	0.133191	0.0741107	0.139244
Levofloxacin		1.149	1.02	1.312	1.16033	2.77	2.613	1.747	2.37667	0.968338	1.01215	1.06237	1.01428	0.987	0.902	0.927	0.938667	0.663154	1.29434	0.735511	0.89767	1.17942	1.19949	1.03639	1.13844	0.789474	1.36842	1	1.05263	3.36364	3.22727	1.86364	2.81818	0.948737	0.948936	0.762616	0.886763	1.17058	1.31602	1.17354	1.22004				#DIV/0!	0.196115	0.122498	0.133871	0.150828
Docetaxel		0.516	0.451	0.558	0.508333	0.758	0.701	0.422	0.627	1.05288	1.08976	1.0387	1.06045	1.048	1.002	1.037	1.029	2.0692	3.71514	2.87004	2.88479	0.699138	0.755499	0.104511	0.519716	1.10526	1.73684	1.65789	1.5	0.545455	0.545455	0.0454545	0.378788	0.936581	0.918049	0.99995	0.951527	0.801646	1.05806	0.470392	0.776699				#DIV/0!	0.109596	0.0750786	0.141628	0.108768
Mecillinam		1.036	1.055	1.051	1.04733	1.755	1.742	2.391	1.96267	0.998405	0.992067	0.962553	0.984342	1.018	0.915	0.952	0.961667	1.1275	1.37232	1.01545	1.17176	1.3331	1.59655	0.775469	1.23504	1.21053	1.5	1.10526	1.27193	2.40909	2.86364	1.90909	2.39394	1.11453	1.02446	1.15269	1.09723	1.28361	1.00919	1.24452	1.17911				#DIV/0!	0.23793	0.489561	0.246226	0.324572
Nitrendipine		0.738	0.611	0.753	0.700667	1.903	1.041	1.533	1.49233	0.902342	0.870154	0.931407	0.901301	0.955	0.925	0.97	0.95	1.34317	1.53811	1.1124	1.33123	1.09022	1.01794	1.15195	1.0867	1.02632	0.973684	0.868421	0.95614	2.13636	1.09091	1.81818	1.68182	0.933094	0.932995	1.09451	0.986865	1.16338	1.06655	1.09805	1.10933				#DIV/0!	0.132136	0.0740218	0.0605116	0.0888899
Racecadotril		1.272	1.132	0.921	1.10833	2.26	2.404	1.729	2.131	0.995332	1.01293	1.0522	1.02015	0.944	0.934	0.978	0.952	0.419389	0.942044	1.4071	0.922843	0.722656	1.3406	1.04683	1.0367	0.552632	1.10526	1.34211	1	1.68182	3.31818	1.86364	2.28788	0.922632	1.01759	0.91496	0.951726	1.20144	1.05935	1.13033	1.13037				#DIV/0!	0.0781759	0.164237	0.0772013	0.106538
Sulfisoxazole		1.453	0.845	1.091	1.12967	1.22	2.221	1.551	1.664	1.11534	0.945675	1.01883	1.02662	0.94	0.983	1.021	0.981333	0.873902	1.47243	0.814542	1.05362	1.62909	1.01368	0.797263	1.14668	1.31579	1.28947	0.921053	1.17544	2.04545	2.31818	1.27273	1.87879	1.0968	0.943456	0.990684	1.01031	1.16466	1.24053	1.13084	1.17868				#DIV/0!	0.156542	0.173418	0.170766	0.166909
Doxylamine succinate		0.894	0.992	1.043	0.976333	1.15	1.821	1.611	1.52733	1.07642	1.04279	0.975459	1.03156	1.027	0.959	0.901	0.962333	1.30734	0.998595	0.730242	1.01206	1.95824	0.872985	0.767157	1.19946	1.21053	1.02632	0.789474	1.00877	2.31818	1.63636	1.27273	1.74242	0.824491	0.998854	1.14422	0.989189	1.35138	1.05973	0.868257	1.09312				#DIV/0!	0.180932	0.439537	0.0794584	0.233309
Vincristine sulfate		0.504	0.543	0.576	0.541	1.951	1.925	1.642	1.83933	1.02726	1.06124	1.10643	1.06498	0.924	0.905	0.94	0.923	0.90692	0.420794	1.0576	0.795106	0.543031	0.802737	0.779726	0.708498	0.473684	0.236842	0.631579	0.447368	1.09091	1.59091	1.31818	1.33333	0.854382	1.17531	1.014	1.01456	1.3164	1.28747	1.1176	1.24049				#DIV/0!	0.218668	0.583998	0.46268	0.421782
Doxapram hydrochloride		1.218	0.853	0.915	0.995333	2.269	2.047	1.206	1.84067	0.9887	0.988905	1.04787	1.00849	0.972	0.943	0.941	0.952	0.375132	0.953284	1.41482	0.914413	1.16736	0.905829	1.06123	1.0448	0.473684	0.842105	1.34211	0.885965	2.72727	1.90909	1.31818	1.98485	0.847706	1.14781	0.80536	0.933626	1.31229	1.33158	1.1392	1.26102				#DIV/0!	0.26759	0.218119	0.152153	0.212621
Piroxicam		0.695	0.57	0.641	0.635333	0.736	1.054	0.557	0.782333	1.00456	1.0163	0.993841	1.0049	1.017	1.063	1.023	1.03433	1.9006	2.67439	1.82367	2.13289	0.899747	0.670248	0.791992	0.787329	1.36842	1.57895	1.21053	1.38596	0.681818	0.727273	0.454545	0.621212	0.899816	0.903701	1.01709	0.940202	1.06153	1.09317	1.43098	1.19522				#DIV/0!	0.0432176	0.142624	0.0521945	0.0793455
Azithromycin		0.961	1.065	1.19	1.072	2.147	2.478	1.903	2.176	1.03882	1.01842	1.03462	1.03062	1.032	0.972	0.952	0.985333	1.0836	1.0014	0.918159	1.00105	1.11029	1.14019	0.951039	1.06717	1.07895	1.10526	1.13158	1.10526	2.45455	2.90909	1.86364	2.40909	1.03821	1.02038	0.795198	0.951261	1.43008	1.19167	1.09188	1.23787				#DIV/0!	0.118296	0.5574	0.0391275	0.238275
Halometasone monohydrate		0.955	1.081	1.263	1.09967	3.027	3.436	3.641	3.368	1.04219	1.05072	1.11402	1.06898	0.85	0.945	0.957	0.917333	1.70179	1.50369	1.18616	1.46388	1.00639	1.04065	1.00639	1.01781	1.68421	1.68421	1.55263	1.64035	3.13636	3.68182	3.77273	3.5303	0.819907	0.885169	0.942859	0.882645	1.04263	1.18652	1.13792	1.12236				#DIV/0!	0.766409	0.826221	0.370465	0.654365
Tizanidine hydrochloride		1.025	1.015	0.917	0.985667	2.417	2.478	1.333	2.076	0.985396	0.98861	0.940778	0.971594	0.984	1.038	0.902	0.974667	0.916403	0.851071	0.775553	0.847676	1.02281	0.979828	1.39128	1.13131	0.973684	0.894737	0.736842	0.868421	2.54545	2.5	1.90909	2.31818	1.06272	0.983012	0.982215	1.00932	1.065	1.12531	1.10371	1.09801				#DIV/0!	0.0845124	0.0813065	0.0635138	0.0764442
Medrysone		1.196	0.948	1.097	1.08033	3.937	3.828	3.471	3.74533	1.01811	0.92953	0.949056	0.965565	0.97	0.984	0.989	0.981	0.955743	1.04496	0.810327	0.93701	1.30076	1.25697	1.06842	1.20872	1.18421	1.02632	0.921053	1.04386	5.27273	4.95455	3.81818	4.68182	0.734918	0.998954	1.02207	0.918647	1.32553	1.22292	1.35022	1.29956				#DIV/0!	0.127187	0.265472	0.264019	0.218893
Ethacrynic acid	18	0.842	0.822	0.985	0.883	0.732	1.544	1.512	1.26267	0.928377	1.05495	1.02856	1.00396	0.981	0.99	0.978	0.983	1.36374	1.4412	1.01497	1.2733	1.57092	0.830924	0.990113	1.13065	1.08772	1.12281	0.947368	1.05263	1.19444	1.33333	1.55556	1.36111	1.10735	1.06757	1.1266	1.1005	1.08441	1.17126	1.23823	1.16464	0.738477	0.648782	0.987398	0.791552	0.398026	0.339153	0.447873	0.395017
Verapamil hydrochloride		1.044	0.949	0.779	0.924	0.845	0.823	1.087	0.918333	1.06064	1.07287	0.937021	1.02351	0.908	0.947	1.051	0.968667	1.34854	1.40556	1.47303	1.40904	1.13927	0.649476	0.664083	0.817608	1.33333	1.26316	1.08772	1.22807	1	0.555556	0.75	0.768519	1.02819	0.9066	1.02259	0.985792	1.3143	1.18589	1.13663	1.21227	0.580682	0.800714	0.654731	0.678709	0.641286	0.492129	0.788537	0.640651
Idebenone		0.783	0.992	1.188	0.987667	1.366	1.533	1.353	1.41733	1.00284	0.957661	1.00978	0.990091	1.012	0.967	0.942	0.973667	1.27774	1.38133	0.997862	1.21898	1.44751	1.16798	0.888955	1.16815	0.947368	1.29825	1.12281	1.12281	2.05556	1.86111	1.25	1.72222	1.05195	1.02455	1.03575	1.03742	1.49532	1.26928	1.156	1.30686	0.555223	0.912586	0.896865	0.788225	0.795698	0.425875	0.433975	0.551849
Anastrozole		0.849	1.185	1.167	1.067	0.793	1.114	1.382	1.09633	0.963023	1.02254	1.00094	0.9955	0.948	0.92	0.935	0.934333	1.39606	0.843906	0.920409	1.05346	1.04417	1.22413	1.04397	1.10409	1.12281	0.947368	1.01754	1.02924	0.861111	1.41667	1.5	1.25926	0.817619	0.989491	0.990866	0.932659	1.40513	1.13521	1.05516	1.1985	0.990688	1.35146	0.927391	1.08985	0.424086	0.336476	0.390212	0.383591
Methazolamide		0.902	0.805	0.893	0.866667	1.175	1.743	1.356	1.42467	0.982462	0.971975	0.980563	0.978333	0.95	0.96	0.979	0.963	1.68401	1.88596	2.03326	1.86774	1.13698	1.11939	1.14354	1.1333	1.4386	1.4386	1.7193	1.53216	1.38889	2.02778	1.61111	1.67593	0.998821	0.99067	0.960519	0.983337	1.14958	1.26094	1.15125	1.18726	0.977855	0.864012	0.766832	0.869566	0.512041	0.499943	0.633455	0.54848
Prednisolone		1.163	1.048	1.016	1.07567	1.759	2.531	2.854	2.38133	1.16901	1.07149	1.10303	1.11451	0.932	0.935	0.976	0.947667	1.87883	2.19054	1.9311	2.00016	1.24589	1.40448	0.870969	1.17378	2.07018	2.17544	1.85965	2.03509	2.27778	3.69444	2.58333	2.85185	0.889314	0.989491	0.63573	0.838178	1.05568	1.10686	1.17819	1.11358	5.46989	7.36392	6.62234	6.48538	1.80927	3.39875	2.49159	2.56653
Prednisone		1.045	0.867	0.988	0.966667	0.826	1.334	0.928	1.02933	1.05698	0.958178	0.937217	0.984124	0.989	0.939	0.94	0.956	2.01996	2.30744	1.08672	1.8047	1.90967	1.88324	1.84339	1.87877	2	1.89474	1.01754	1.63743	1.63889	2.61111	1.77778	2.00926	0.734924	0.858476	0.90277	0.832057	1.36806	1.29352	1.42078	1.36079	0.631556	0.590115	0.658577	0.626749	0.530879	0.399914	0.334972	0.421922
L-Thyroxine		1.136	1.284	1.006	1.142	0.869	0.914	1.218	1.00033	1.04208	1.06833	1.0154	1.04194	0.894	0.944	0.975	0.937667	1.27109	1.12521	1.73105	1.37578	1.3229	1.37368	0.855468	1.18401	1.36842	1.36842	1.64912	1.46199	1.19444	1.30556	1.08333	1.19444	0.852485	0.997938	0.919662	0.923361	1.03169	1.1043	1.32213	1.1527	1.61169	1.12772	1.13622	1.29188	0.155255	0.270801	0.293945	0.24
Mevastatin		0.998	0.782	0.707	0.829	0.992	0.992	0.992	0.992	0.955706	1.09155	0.940722	0.995994	0.923	0.876	0.879	0.892667	0.631029	1.89499	2.35733	1.62778	0.754012	1.50802	1.40031	1.22078	0.596491	1.40351	1.57895	1.19298	0.777778	1.55556	1.44444	1.25926	1.08869	0.895895	0.99558	0.993387	1.09083	1.1932	1.22733	1.17045	0.309669	1.26796	0.918417	0.832015	0.302472	0.48304	0.379171	0.388228
Fluvastatin		0.876	0.848	0.677	0.800333	0.99	1.278	0.987	1.085	0.959127	0.924118	0.925612	0.936286	0.9	0.952	0.915	0.922333	1.52198	1.79045	2.89808	2.07017	1.3231	0.941422	0.785214	1.01658	1.26316	1.4386	1.85965	1.52047	1.36111	1.25	0.805556	1.13889	1.1316	0.814477	0.978688	0.974923	1.16498	1.0789	1.08377	1.10922	0.718749	0.726663	0.729305	0.724906	0.442499	0.287346	0.533563	0.421136
Zonisamide		0.831	1.032	1.104	0.989	1.119	0.713	1.146	0.992667	1.00084	0.975619	1.02367	1.00004	1.048	0.955	0.932	0.978333	2.05037	1.50725	1.17463	1.57741	1.00323	0.787499	1.18965	0.993458	1.61404	1.47368	1.22807	1.4386	1.16667	0.583333	1.41667	1.05556	0.997348	0.823021	0.732665	0.851012	1.1093	1.21565	1.04003	1.12166	0.477252	0.883147	0.857674	0.739357	0.514536	0.463778	0.652194	0.543503
Ipratropium bromide		0.963	1.037	1.001	1.00033	1.331	1.611	1.14	1.36067	1.00636	1.03842	1.05386	1.03288	0.967	0.924	0.933	0.941333	1.77002	1.82229	1.55429	1.71553	1.10409	1.06166	0.960898	1.04222	1.61404	1.78947	1.47368	1.62573	1.52778	1.77778	1.13889	1.48148	1.10627	1.0987	1.21017	1.13838	1.1025	0.950225	1.1084	1.05371	0.899295	0.655268	0.858865	0.804476	0.446156	0.355189	0.23493	0.345425
Carbidopa		1.126	0.765	0.812	0.901	1.568	1.181	1.175	1.308	1.07368	0.958457	1.06812	1.03342	0.955	0.933	0.937	0.941667	1.61131	2.5645	1.45925	1.87836	0.954439	1.04119	0.864113	0.953247	1.7193	1.85965	1.12281	1.56725	1.55556	1.27778	1.05556	1.2963	0.997741	0.921626	1.08338	1.00092	0.932777	0.86517	1.20154	0.999829	1.2839	0.565955	1.19751	1.01579	0.336259	0.323192	0.334232	0.331228
Azathioprine		1.095	0.845	1.046	0.995333	1.743	1.762	0.987	1.49733	1.03367	0.970047	1.08116	1.02829	0.975	0.996	0.965	0.978667	1.62319	1.7971	1.23925	1.55318	0.904755	1.15298	1.48914	1.18229	1.68421	1.4386	1.22807	1.45029	1.63889	2.11111	1.52778	1.75926	1.08947	0.981536	0.953349	1.00812	1.05337	1.09429	0.93932	1.02899	1.00537	1.50268	0.611361	1.0398	0.353423	0.709006	0.694482	0.585637
Methylprednisolone		1.163	1.193	1.349	1.235	1.313	1.269	1.555	1.379	1.11099	1.09799	1.14476	1.11791	0.922	0.948	0.913	0.927667	3.3761	1.9254	2.08648	2.46266	1.83266	2.08426	1.66761	1.86151	3.7193	2.17544	2.66667	2.8538	2.5	2.75	2.69444	2.64815	0.794048	0.868592	0.835003	0.832548	1.1093	1.02322	1.23836	1.12363	8.60415	9.17051	8.985	8.91989	1.94011	2.24836	1.58327	1.92391
Raloxifene hydrochloride		0.986	1.147	0.879	1.004	1.264	1.06	1.057	1.127	1.03216	1.04141	1.02877	1.03411	0.989	0.876	0.831	0.898667	1.46496	0.968876	1.34806	1.26063	0.740001	0.504397	0.657425	0.633941	1.36842	1.05263	1.12281	1.18129	0.972222	0.555556	0.722222	0.75	0.994598	0.94834	0.970733	0.971224	1.3247	1.16562	1.14779	1.2127	1.25624	0.802075	0.295324	0.784545	0.312113	0.195603	0.198731	0.235482
Medroxyprogesterone 17-acetate		1.166	0.884	1.157	1.069	1.781	1.694	1.85	1.775	1.05388	1.04918	1.06334	1.05547	0.964	0.864	0.888	0.905333	1.14326	2.68187	2.1454	1.99018	1.47106	1.13569	1.51657	1.37444	1.26316	2.24561	2.35088	1.95322	2.72222	2	2.91667	2.5463	0.997938	1.05254	1.01287	1.02112	1.07543	1.13047	1.16511	1.12367	1.13145	1.33984	1.46856	1.31329	0.933816	0.604102	0.77295	0.77029
Ethionamide		0.999	0.766	0.869	0.878	1.633	1.703	1.283	1.53967	0.96368	0.95181	1.0057	0.973729	0.942	0.939	1.013	0.964667	1.29817	2.03041	1.96056	1.76305	0.802107	0.832017	0.91658	0.850234	1.22807	1.47368	1.61404	1.4386	1.36111	1.47222	1.22222	1.35185	0.866038	0.929189	0.961501	0.918909	1.04208	1.30212	0.918409	1.08753	1.24729	1.20862	1.29907	1.25166	0.270992	0.318333	0.410544	0.33329
Cyproheptadine hydrochloride		1.073	1.387	1.283	1.24767	1.501	1.318	1.291	1.37	1.04962	1.09127	1.06219	1.06769	1.031	0.974	0.942	0.982333	1.06961	1.62842	0.866239	1.18809	1.06851	1.0545	0.952253	1.02509	1.08772	2.14035	1.05263	1.4269	1.66667	1.44444	1.27778	1.46296	1.03791	0.892654	1.16893	1.03316	1.16793	1.29096	1.35189	1.27026	0.569167	0.523395	0.699228	0.597263	0.410129	0.246511	0.288461	0.315034
Thiabendazole		1.002	1.115	1.064	1.06033	1.278	1.06	1.342	1.22667	1.07369	1.07322	1.11	1.08564	0.927	0.914	0.975	0.938667	1.88596	1.76099	1.14897	1.59864	0.773985	1.03403	1.19481	1.00094	1.78947	1.85965	1.15789	1.60234	1.02778	1.13889	1.66667	1.27778	0.921332	1.04518	0.970733	0.979081	1.03874	1.12405	1.09583	1.08621	1.15246	1.62743	0.877959	1.21928	0.407868	0.317081	0.467767	0.397572
Methylprednisolone acetate		1.36	1.083	1.113	1.18533	1.899	2.265	2.095	2.08633	1.15878	1.17024	1.11873	1.14925	0.94	0.947	0.917	0.934667	1.36137	2.08696	3.29437	2.24756	1.56228	2.08884	1.45417	1.70176	1.75439	2.14035	3.47368	2.45614	3.08333	4.91667	3.16667	3.72222	0.854449	0.893734	0.912787	0.88699	1.17716	1.04631	1.28942	1.17096	6.48358	4.84144	8.28642	6.53715	1.71129	2.18419	1.63924	1.84491
Miglitol		1.1	1.023	0.969	1.03067	1.482	1.38	0.992	1.28467	0.983747	1.03138	1.07628	1.03047	0.962	0.973	0.991	0.975333	1.21216	1.19506	1.75861	1.38861	0.883689	0.794157	1.0233	0.900383	1.26316	1.15789	1.61404	1.34503	1.36111	1.13889	1.05556	1.18519	1.00422	0.984875	0.872717	0.953938	1.41591	1.11379	1.07338	1.20103	0.920046	1.29702	0.734041	0.983702	0.291161	0.271048	0.818059	0.460089
Prilocaine hydrochloride		0.977	1.133	0.987	1.03233	0.974	0.979	1.03	0.994333	1.0621	0.997879	0.990533	1.01684	1.036	0.957	0.916	0.969667	1.17558	0.718936	0.900927	0.931813	1.59209	1.31038	1.37507	1.42585	1.08772	0.77193	0.842105	0.900585	1.61111	1.33333	1.47222	1.47222	1.01905	0.828717	0.985956	0.944575	1.40744	1.08352	1.21488	1.23528	1.1451	0.791323	0.658773	0.865066	1.2824	0.677614	0.46268	0.807566
Minocycline hydrochloride		0.943	1.03	0.928	0.967	0.992	0.793	1.143	0.976	1.00291	1.02146	0.995128	1.0065	0.929	0.94	0.993	0.954	1.68876	1.83321	1.15799	1.55999	0.754012	1.92001	1.21578	1.2966	1.50877	1.78947	1.01754	1.4386	0.777778	1.58333	1.44444	1.26852	0.86211	1.09419	1.11334	1.02321	1.1152	1.24939	1.18242	1.18234	2.05329	1.28834	0.89606	1.41256	0.334049	0.54753	0.411284	0.430955
					#DIV/0!	#N/A	#N/A	#N/A	#N/A				#DIV/0!	#N/A	#N/A	#N/A	#N/A				#DIV/0!	#N/A	#N/A	#N/A	#N/A				#DIV/0!	#N/A	#N/A	#N/A	#N/A				#DIV/0!	#N/A	#N/A	#N/A	#N/A				#DIV/0!	#N/A	#N/A	#N/A	#N/A
					#DIV/0!	#N/A	#N/A	#N/A	#N/A				#DIV/0!	#N/A	#N/A	#N/A	#N/A				#DIV/0!	#N/A	#N/A	#N/A	#N/A				#DIV/0!	#N/A	#N/A	#N/A	#N/A				#DIV/0!	#N/A	#N/A	#N/A	#N/A				#DIV/0!	#N/A	#N/A	#N/A	#N/A
					#DIV/0!	#N/A	#N/A	#N/A	#N/A				#DIV/0!	#N/A	#N/A	#N/A	#N/A				#DIV/0!	#N/A	#N/A	#N/A	#N/A				#DIV/0!	#N/A	#N/A	#N/A	#N/A				#DIV/0!	#N/A	#N/A	#N/A	#N/A				#DIV/0!	#N/A	#N/A	#N/A	#N/A
					#DIV/0!	#N/A	#N/A	#N/A	#N/A				#DIV/0!	#N/A	#N/A	#N/A	#N/A				#DIV/0!	#N/A	#N/A	#N/A	#N/A				#DIV/0!	#N/A	#N/A	#N/A	#N/A				#DIV/0!	#N/A	#N/A	#N/A	#N/A				#DIV/0!	#N/A	#N/A	#N/A	#N/A
Enrofloxacin	28	0.984	0.961	1.211	1.052	1.067	1.068	1.155	1.09667	0.915542	1.02407	0.970054	0.969888	0.996	1.009	1.037	1.014	0.789508	1.03128	0.797002	0.872597	1.28012	1.07043	0.724444	1.025	0.794521	1.0137	0.986301	0.931507	1.33032	1.11312	0.81448	1.08597	0.906623	0.946948	1.01588	0.956484	0.96435	0.927507	0.918471	0.936776	1.30316	1.03561	0.825476	1.05475	0.81472	0.715667	0.62888	0.719756
Dilantin		0.857	0.838	0.947	0.880667	0.887	1.099	1.077	1.021	0.891127	0.912559	0.894677	0.899454	1.003	1.013	1.028	1.01467	1.03193	0.831541	0.877485	0.913653	1.017	0.981314	1.00939	1.00256	0.90411	0.712329	0.849315	0.821918	0.877828	1.04977	1.05882	0.995475	1.07107	0.992003	1.07772	1.04693	0.858093	0.985204	0.975571	0.939623	0.826056	0.613046	0.790345	0.743149	0.522756	0.462279	0.669498	0.551511
Propranolol hydrochloride		1.355	1.25	1.15	1.25167	1.138	1.397	1.434	1.323	1.00158	0.942967	1.03611	0.993551	0.994	1.03	1.023	1.01567	0.850114	1.2219	1.39752	1.15651	0.939545	0.844847	0.667625	0.817339	1.17808	1.56164	1.64384	1.46119	1.04072	1.14932	0.932127	1.04072	0.958662	1.16986	1.05373	1.06075	0.924131	1.00497	1.03257	0.987223	1.03389	1.09041	0.808876	0.977725	1.13366	0.421407	0.473177	0.676082
Nitazoxanide		1.036	1.057	1.012	1.035	1.515	1.786	1.434	1.57833	0.906189	0.914813	0.849288	0.890097	1.017	1.029	1.016	1.02067	1.60345	1.47084	1.80124	1.62518	0.7422	0.681661	0.978777	0.800879	1.69863	1.58904	1.86301	1.71689	1.09502	1.18552	1.36652	1.21569	1.14497	1.08617	0.799054	1.01006	0.968421	1.14429	0.914499	1.00907	1.73952	1.18218	1.89748	1.60639	0.460543	0.425994	1.02972	0.638753
Acarbose		1.281	0.92	1.057	1.086	1.014	1.068	1.263	1.115	0.992742	0.93715	0.988342	0.972744	1.021	0.987	1.025	1.011	1.29651	1.36852	1.80026	1.48843	0.944618	0.922466	1.03796	0.968349	1.69863	1.28767	1.94521	1.64384	0.932127	0.959276	1.27602	1.05581	0.994368	0.768191	0.890741	0.884433	1.00248	1.04111	1.00824	1.01728	1.11304	0.754206	0.931601	0.932948	0.87461	1.30876	0.659214	0.947527
Chlorambucil		0.955	0.965	0.817	0.912333	0.803	0.72	0.768	0.763667	0.861395	0.847264	0.818746	0.842468	1	0.979	0.97	0.983	1.43141	0.777126	1.37667	1.19507	1.27319	1.67819	1.25898	1.40346	1.39726	0.767123	1.15068	1.10502	0.995475	1.17647	0.941176	1.03771	0.870354	1.03255	1.01239	0.971765	0.973386	1.0282	0.927011	0.9762	0.477589	0.405737	0.430524	0.43795	0.534874	0.905699	0.774663	0.738412
Nicotinamide		0.993	1.045	1.267	1.10167	1.347	1.399	1.613	1.453	1.01531	0.982228	1.01069	1.00274	1.04	1.01	1.029	1.02633	0.971978	0.820463	1.05735	0.949929	0.807305	1.09597	0.847214	0.916829	0.986301	0.876712	1.36986	1.07763	1.05882	1.49321	1.33032	1.29412	1.09563	0.840955	0.9082	0.948262	0.875174	0.927507	0.99146	0.93138	1.22298	0.787682	1.04262	1.01776	0.684368	0.529447	0.413513	0.542443
Oxiconazole nitrate		1.218	1.326	1.271	1.27167	1.549	1.299	1.411	1.41967	1.00972	0.98293	1.01092	1.00119	1.01	0.995	0.993	0.999333	0.704138	0.889541	0.463669	0.685783	0.605902	0.6798	0.50055	0.595417	0.876712	1.20548	0.60274	0.894977	0.914027	0.859729	0.687783	0.820513	0.733499	0.987722	1.04201	0.921078	0.923237	0.937736	0.922344	0.927772	0.798695	0.506132	0.632003	0.64561	0.555489	0.346332	0.45243	0.451417
Isoproterenol hydrochloride		1.327	1.3	1.191	1.27267	1.036	1.224	1.277	1.179	0.975858	1.00477	1.00757	0.996066	1.009	1.028	1.015	1.01733	0.908439	0.741935	0.562724	0.7377	0.897607	1.09343	1.14247	1.0445	1.23288	0.986301	0.684932	0.968037	0.904977	1.30317	1.42081	1.20965	1.10182	0.96925	0.865848	0.978974	0.973386	0.990367	0.926018	0.963257	0.528335	0.641558	0.648025	0.605973	0.910903	0.596633	0.749299	0.752278
Carbamazepine		1.36	1.109	1.353	1.274	1.216	1.371	1.29	1.29233	0.990609	0.963454	1.0231	0.992386	1.002	1.022	1.019	1.01433	0.807755	1.087	0.732812	0.875855	0.840619	0.901497	0.828612	0.856909	1.12329	1.23288	1.0137	1.12329	0.995475	1.20362	1.04072	1.07994	1.1096	0.872269	1.18867	1.05684	1.04022	0.814101	0.927011	0.92711	1.03574	1.09845	0.741476	0.958553	0.520325	0.53771	0.787839	0.615291
Ketoprofen		1.066	0.999	1.409	1.158	1.533	1.342	1.605	1.49333	1.00286	0.995292	1.01874	1.00563	1.044	1.005	1.029	1.026	1.13131	1.63604	0.817856	1.19507	0.806122	1.12877	0.891858	0.942251	1.23288	1.67123	1.17808	1.36073	1.20362	1.47511	1.39367	1.35747	0.985808	1.0695	0.860667	0.971991	0.846673	0.937736	0.925422	0.903277	0.971617	1.10202	1.00857	1.0274	0.472141	0.444975	0.2558	0.390972
Clomipramine hydrochloride		1.471	1.591	1.263	1.44167	1.865	1.962	1.487	1.77133	1.06674	1.06088	0.979718	1.03578	1.043	1.04	1.009	1.03067	0.728576	0.437928	0.381883	0.516129	0.692483	0.492771	0.506299	0.563851	1.09589	0.712329	0.493151	0.767123	1.25792	0.941176	0.733032	0.977376	1.07749	1.10633	0.841406	1.00841	0.918471	0.934161	0.911122	0.921251	0.497799	0.799535	0.368876	0.555404	0.346886	0.291536	0.227517	0.288646
Buspirone hydrochloride		1.484	1.438	1.222	1.38133	1.165	1.425	1.359	1.31633	1.04756	1.05873	1.05628	1.05419	1.034	1.041	1.026	1.03367	1.28185	1.21082	1.07429	1.18899	1.21299	1.16784	0.88205	1.08762	1.94521	1.78082	1.34247	1.6895	1.37557	1.61991	1.16742	1.38763	1.11061	1.04111	0.985582	1.04577	1.01132	0.884012	1.01192	0.969083	1.30317	0.706682	1.79219	1.26735	1.03662	1.06737	1.01496	1.03965
Tamoxifen		1.347	1.357	1.352	1.352	1.666	1.758	1.517	1.647	0.99451	0.983186	1.01388	0.997191	1.023	1.033	1.019	1.025	0.636689	0.651678	0.535028	0.607798	0.513063	0.660692	0.569882	0.581212	0.876712	0.90411	0.739726	0.840183	0.832579	1.13122	0.841629	0.935143	1.09214	0.900766	0.930052	0.974319	0.825422	0.834161	0.856802	0.838795	0.603358	0.374595	0.397638	0.45853	0.423036	0.463729	0.424512	0.437092
Doxepin hydrochloride		1.527	1.417	1.696	1.54667	1.518	1.714	1.802	1.678	1.11561	1.0794	1.07211	1.08904	1.02	1.045	1.057	1.04067	0.491365	1.17237	0.584555	0.74943	0.857191	0.623489	0.587977	0.689552	0.767123	1.69863	1.0137	1.15982	1.26697	1.04072	1.03167	1.11312	0.957198	1.06308	1.18946	1.06991	1.04638	0.909335	0.861867	0.939192	1.15341	0.842183	1.11714	1.03758	0.546479	0.322165	0.338338	0.402328
Rifabutin		1.244	1.633	1.422	1.433	1.734	1.519	1.421	1.558	1.04457	1.08121	1.02335	1.04971	1.059	1.026	1.019	1.03467	0.818508	0.377322	0.433366	0.543065	0.562949	0.697726	0.784984	0.681886	1.0411	0.630137	0.630137	0.767123	0.950226	1.03167	1.08597	1.02262	0.791845	0.976233	1.03109	0.933055	0.9571	0.986495	1.01192	0.98517	0.613805	0.757678	0.667612	0.679699	0.498915	0.408258	0.341115	0.416096
Dapsone		1.569	1.5	1.55	1.53967	0.85	1.303	1.193	1.11533	1.0674	1.0226	1.07542	1.05514	0.964	1.021	1.014	0.999667	1.02476	0.928967	0.985337	0.979689	2.01133	1.46208	1.52668	1.66669	1.64384	1.42466	1.56164	1.54338	1.66516	1.8552	1.77376	1.76471	1.03052	0.976909	0.769543	0.925659	1.04677	1.0287	1.01877	1.03141	3.49436	2.67644	2.70681	2.9592	2.66369	1.5782	1.67684	1.97291
Enalapril maleate		1.632	1.672	1.23	1.51133	1.243	1.055	1.575	1.291	1.02856	1.01903	0.982457	1.01002	1.023	0.974	1.035	1.01067	0.60769	0.544803	0.566308	0.572934	1.04659	1.14551	0.76114	0.984414	1.0137	0.931507	0.712329	0.885845	1.26697	1.17647	1.16742	1.20362	0.97567	0.949876	0.854134	0.92656	0.951639	0.833267	0.969712	0.918206	1.0252	0.7377	0.346184	0.703027	0.6229	0.745397	0.533967	0.634088
Dantrolene sodium		1.043	1.502	1.173	1.23933	1.08	1.26	1.203	1.181	1.01861	1.03034	1.02785	1.0256	1.006	1.015	0.995	1.00533	1.00228	0.981427	1.23395	1.07255	1.29094	1.02511	1.05843	1.12483	1.06849	1.50685	1.47945	1.3516	1.35747	1.25792	1.23982	1.28507	0.960802	1.05666	0.851318	0.956259	0.9428	0.926216	0.987786	0.952267	1.39517	1.07146	0.104341	0.856988	0.677643	0.616135	0.376076	0.556618
Piperacillin sodium		1.17	1.306	1.266	1.24733	1.275	1.161	1.07	1.16867	0.994915	1.01223	0.973671	0.993605	1.012	1.018	1.014	1.01467	1.00749	1.53894	1.29065	1.27903	0.984358	0.992306	1.02545	1.0007	1.20548	2.05479	1.67123	1.64384	1.22172	1.12217	1.06787	1.13725	0.895585	0.899414	0.874183	0.889727	1.06763	0.979543	1.0281	1.02509	1.29028	0.639521	1.0339	0.987901	0.453758	0.381046	0.360877	0.39856
Naloxone hydrochloride		1.456	1.517	1.539	1.504	1.13	1.372	1.23	1.244	0.971431	0.997047	1.02593	0.998136	1.012	1.032	1.033	1.02567	0.791463	1.30694	0.887586	0.99533	1.02816	0.907923	0.846199	0.927426	1.17808	2.0274	1.39726	1.53425	1.13122	1.21267	1.01357	1.11916	1.11354	0.962829	0.958324	1.01156	0.91996	0.897517	0.863555	0.893678	0.558151	0.52626	0.728987	0.604466	0.935804	1.27484	0.45864	0.88976
Cyclophosphamide hydrate		1.319	1.412	1.205	1.312	1.478	1.396	1.348	1.40733	0.997087	0.944047	1.03733	0.992823	1.043	1.038	1.048	1.043	1.0971	0.835125	0.823069	0.918432	0.798681	0.919083	0.841126	0.852964	1.47945	1.20548	1.0137	1.23288	1.14932	1.24887	1.10407	1.16742	1.0223	0.992566	0.982879	0.999249	0.839722	0.95432	0.91569	0.903244	0.731876	0.727039	0.936341	0.798419	0.585297	0.74471	0.838782	0.72293
Bethanechol chloride		1.039	1.498	1.252	1.263	1.182	1.395	1.498	1.35833	1.02932	1.08209	1.10756	1.07299	1.025	1.007	1.037	1.023	1.13425	1.00196	1.11339	1.0832	1.09326	0.799527	0.887123	0.926637	1.20548	1.53425	1.42466	1.38813	1.25792	1.08597	1.29412	1.21267	0.974206	0.929827	0.92442	0.942817	0.850645	0.948461	0.914002	0.904369	3.42031	0.896168	0.952054	1.75618	0.563014	0.666159	0.550221	0.593132
Quinidine		1.134	1.097	1.266	1.16567	1.267	1.524	1.124	1.305	1.04721	0.980365	1.099	1.04219	1.033	1.041	1.016	1.03	1.29945	1.70968	0.740632	1.24992	1.20318	0.884248	0.793777	0.960401	1.50685	1.91781	0.958904	1.46119	1.48416	1.31222	0.868778	1.22172	0.973417	1.05215	0.937936	0.987835	0.875273	1.01102	0.978352	0.954882	0.576314	0.937545	1.04853	0.854129	0.528993	0.696264	0.368224	0.531161
Atropine		1.368	1.188	1.342	1.29933	1.106	1.354	1.28	1.24667	1.0463	0.979772	1.00975	1.01194	1.032	1.04	1.033	1.035	1.29228	0.969697	0.878462	1.04681	0.991798	1.05048	0.966095	1.00279	1.80822	1.17808	1.20548	1.39726	1.06787	1.38462	1.20362	1.2187	1.04201	0.91631	1.17132	1.04322	1.11976	0.878252	0.88292	0.960311	0.828545	0.648405	0.968103	0.815018	1.30048	0.360305	0.780342	0.813709
Eszopiclone		1.182	1.214	1.252	1.216	1.083	0.99	1.145	1.07267	0.991797	0.977477	1.04835	1.00587	1.027	1.019	1.028	1.02467	0.929619	1.03747	0.663082	0.876724	1.26118	1.26693	1.2578	1.26197	1.12329	1.28767	0.849315	1.08676	1.33032	1.22172	1.40271	1.31825	0.858865	0.886574	1.04111	0.92885	1.02046	0.916087	1.07299	1.00318	0.760082	0.621367	0.616966	0.666139	0.914922	0.790892	0.825461	0.843758
Terbutaline sulfate		0.977	1.16	1.186	1.10767	1.201	1.372	1.319	1.29733	1.0111	1.08182	0.984617	1.02584	1.01	1.024	1.037	1.02367	0.795373	0.554252	0.790811	0.713479	0.96694	0.941405	1.07094	0.993095	0.794521	0.657534	0.958904	0.803653	1.13122	1.25792	1.37557	1.2549	0.940527	0.94661	1.00315	0.96343	0.9571	0.979444	0.836246	0.924263	1.12497	1.11152	0.980404	1.0723	0.381675	0.246137	0.426699	0.351504
Metyrapone		0.977	0.84	0.978	0.931667	1.419	1.373	1.162	1.318	0.906581	0.901519	0.923977	0.910692	1.043	1.038	1.011	1.03067	1.39883	1.27664	0.822092	1.16585	0.766213	0.974888	0.95189	0.897664	1.39726	1.09589	0.821918	1.10502	1.05882	1.30317	1.07692	1.1463	1.07299	1.0508	1.06094	1.06158	0.953426	1.05094	0.985104	0.996491	1.78733	1.29667	1.11104	1.39835	0.621427	0.63036	0.465582	0.572456
Daunorubicin hydrochloride	29	0.095	0.138	0.115	0.116	0.067	0.095	0.077	0.0796667	0.458485	0.713464	0.661904	0.611285	0.772	0.876	0.788	0.812	1.33245	1.46968	2.20734	1.66982	0.500872	0.494282	1.04077	0.678641	0.138889	0.222222	0.277778	0.212963	0.0325733	0.0456026	0.0781759	0.0521173	0.392244	0.478206	0.504834	0.458428	0.388886	0.397395	0.417669	0.401317	0.0290902	0.0104683	0.0489423	0.0295003	0.0088855	0.000880376	0.00200251	0.00392279
Penicillin V		1.029	1.201	1.184	1.138	1.126	0.957	0.999	1.02733	0.986662	1.01762	0.994528	0.999603	1.045	1.028	1.043	1.03867	1.10559	1.22005	0.725525	1.01706	1.07837	1.35401	1.36344	1.26528	1.25	1.61111	0.944444	1.26852	1.17915	1.25733	1.32248	1.25299	1.08071	1.07839	1.0774	1.07884	1.04165	0.978098	1.12159	1.04711	0.634605	0.426313	0.491644	0.517521	1.02482	0.939697	1.03447	0.99966
Fluorometholone		1.078	1.118	1.06	1.08533	0.787	0.687	0.785	0.753	1.1992	1.11388	1.1576	1.15689	0.937	0.932	0.962	0.943667	2.60367	2.46466	2.02573	2.36469	2.3953	1.70938	1.80332	1.96933	3.08333	3.02778	2.36111	2.82407	1.83062	1.14007	1.37459	1.44843	0.928015	0.977626	0.9584	0.95468	0.875466	0.91717	0.910447	0.901028	16.2313	15.5486	15.4739	15.7513	5.39607	3.35109	2.56979	3.77231
Rifapentine		1.56	1.703	1.647	1.63667	1.381	1.699	1.433	1.50433	1.10207	1.08122	1.09279	1.09203	0.961	0.981	0.964	0.968667	0.307897	0.475007	0.291334	0.358079	0.393487	0.229114	0.192027	0.271543	0.527778	0.888889	0.527778	0.648148	0.527687	0.37785	0.267101	0.390879	1.06414	1.2407	1.14734	1.15073	1.05877	0.903619	0.85036	0.937584	0.334711	0.21856	0.314799	0.289357	0.298793	0.452932	0.423399	0.391708
Hexachlorophene		1.296	1.21	1.443	1.31633	1.35	1.701	1.46	1.50367	0.926858	0.965244	0.994325	0.962142	0.964	1.007	0.972	0.981	1.15025	0.668441	0.262644	0.693779	0.482264	0.441817	0.390773	0.438285	1.63889	0.888889	0.416667	0.981481	0.631922	0.729642	0.553746	0.638436	0.960168	0.879509	1.00315	0.947609	0.985976	0.972425	1.09722	1.01854	0.432415	0.302935	0.164612	0.299988	0.548792	0.681457	0.379767	0.536672
Thiothixene		1.368	1.449	1.386	1.401	1.442	1.713	1.525	1.56	0.985397	1.02108	0.946647	0.984374	0.965	0.988	0.976	0.976333	0.628217	0.59302	0.747708	0.656315	0.460684	0.372165	0.541319	0.458056	0.944444	0.944444	1.13889	1.00926	0.644951	0.618893	0.801303	0.688382	0.754544	0.846915	0.944147	0.848535	1.07001	0.943642	0.93818	0.983945	0.373383	0.215089	0.318399	0.30229	0.361387	0.368962	0.436184	0.388844
Ofloxacin		1.272	1.089	1.111	1.15733	1.35	1.126	1.497	1.32433	1.07905	0.988741	1.14309	1.07029	0.985	0.954	0.985	0.974667	0.79444	1.53091	1.02396	1.11643	0.785553	1.09026	0.739549	0.871788	1.11111	1.83333	1.25	1.39815	1.02932	1.19218	1.07492	1.09881	1.03652	0.952986	1.0068	0.998766	1.10363	0.925784	1.06707	1.03216	1.38332	0.973551	0.947548	1.10147	0.743608	0.783024	0.737916	0.754849
Doxazosin		1.477	1.491	1.028	1.332	1.326	1.295	1.314	1.31167	1.05374	1.04157	1.06726	1.05419	0.976	0.954	0.959	0.963	0.735581	1.25436	1.25377	1.08124	0.754151	0.855334	0.638237	0.749241	1.19444	2.05556	1.41667	1.55556	0.970684	1.07492	0.814332	0.953312	1.3239	1.11563	1.00061	1.14671	0.9844	0.947109	1.00131	0.977607	0.845085	0.682192	0.876239	0.801172	0.716607	0.745541	0.819819	0.760656
Pindolol		1.212	1.3	1.723	1.41167	0.766	1.063	1.167	0.998667	0.974143	0.972224	1.0898	1.01205	0.951	0.939	0.954	0.948	1.04289	0.855664	0.997634	0.965395	1.14764	0.997868	0.862312	1.00261	1.38889	1.22222	1.88889	1.5	0.85342	1.02932	0.977199	0.953312	0.942821	1.06966	0.94934	0.987275	1.07338	1.09407	1.09922	1.08889	0.638759	1.64095	0.576837	0.952183	0.845331	0.543229	0.539124	0.642561
Meloxicam		1.332	1.413	1.286	1.34367	1.237	1.086	1.025	1.116	0.977444	1.05843	1.03182	1.02257	0.977	0.979	0.953	0.969667	1.17628	1.01923	1.08075	1.09208	0.75441	0.809201	1.04736	0.870324	1.72222	1.58333	1.52778	1.61111	0.905537	0.85342	1.04235	0.933768	1.02414	1.09209	1.00061	1.03895	0.989653	0.886601	0.930091	0.935448	0.545205	0.506737	0.483356	0.511766	0.491693	0.33427	0.55546	0.460474
Oxacillin sodium		0.97	1.022	1.278	1.09	1.194	1.255	1.178	1.209	0.99796	1.11606	1.14397	1.086	0.969	0.985	0.967	0.973667	1.92842	1.92902	1.24549	1.70098	0.865672	0.786199	0.848614	0.833495	2.05556	2.16667	1.75	1.99074	1.00326	0.957655	0.970684	0.977199	0.928015	1.03088	1.00105	0.986649	0.956038	0.947004	1.07138	0.991474	1.1187	1.38768	1.60142	1.36927	0.555503	0.795252	0.606301	0.652352
Cetirizine		1.346	1.44	1.686	1.49067	1.234	1.161	0.996	1.13033	1.01366	1.0312	1.10102	1.04863	0.97	0.96	0.942	0.957333	0.882579	0.877551	1.18427	0.981465	0.717969	0.87265	0.781547	0.790722	1.30556	1.38889	2.19444	1.62963	0.859935	0.983713	0.7557	0.86645	0.860726	0.89763	0.988012	0.915456	0.985136	1.03083	1.05783	1.0246	0.677128	0.673171	1.38829	0.912863	0.502684	0.526091	0.703457	0.577411
Probenecid		1.304	1.472	1.38	1.38533	1.133	0.96	1.26	1.11767	1.02431	1.04305	1.06419	1.04385	0.971	0.948	0.988	0.969	1.12422	1.15025	0.989056	1.08784	0.989081	1.4265	1.04361	1.15307	1.61111	1.86111	1.5	1.65741	1.08795	1.32899	1.27687	1.23127	0.986686	1.04967	0.910226	0.982193	1.04354	0.96045	1.01602	1.00667	0.6312	0.98409	0.434864	0.683385	0.57885	0.534967	0.460019	0.524612
Aminoglutethimide		1.513	1.342	1.007	1.28733	1.166	1.402	1.378	1.31533	1.08785	1.06438	0.989919	1.04738	0.981	0.997	0.992	0.99	0.801538	0.696539	1.15498	0.884354	1.09362	0.871357	0.891	0.951993	1.33333	1.02778	1.27778	1.21296	1.23779	1.18567	1.19218	1.20521	1.0658	1.05839	0.958179	1.02746	1.04365	0.932402	1.00488	0.993645	0.540511	0.922911	1.25054	0.904654	0.875665	0.532701	0.63505	0.681139
Promethazine hydrochloride		1.034	1.06	1.079	1.05767	1.443	1.506	1.3	1.41633	0.952929	1.03306	1.06031	1.01543	0.985	0.984	0.967	0.978667	1.78438	0.930198	1.28808	1.33422	0.702462	0.682044	0.768883	0.717796	2.02778	1.08333	1.52778	1.5463	0.983713	0.996743	0.970684	0.983713	1.02492	0.943263	1.06182	1.01	1.01077	0.891643	0.909607	0.937339	0.99063	1.03055	0.624701	0.88196	0.427162	0.461151	0.487489	0.458601
Nadolol		1.559	1.33	1.27	1.38633	1.57	1.407	1.122	1.36633	1.09052	1.03286	1.04013	1.0545	0.996	1.005	0.963	0.988	1.4756	1.17776	1.01508	1.22281	0.756607	0.787103	0.837501	0.793737	2.52778	1.72222	1.41667	1.88889	1.15309	1.07492	0.912052	1.04669	0.964477	0.953207	1.06712	0.994936	0.986081	1.04312	1.00173	1.01031	0.609006	0.793572	0.794517	0.732365	0.534519	0.691626	0.534508	0.586884
Hydroxyzine pamoate		1.37	1.508	1.629	1.50233	0.683	1.252	1.086	1.007	1.01955	1.06519	1.08347	1.05607	0.925	0.978	0.964	0.955667	1.01479	0.754215	0.853002	0.874002	0.824837	0.900433	1.02539	0.916887	1.52778	1.25	1.52778	1.43519	0.547231	1.09446	1.08143	0.907709	0.842605	0.909673	0.827579	0.859952	1.02831	1.0656	1.05426	1.04939	0.760921	0.64357	1.0464	0.816965	0.749665	0.404363	0.606045	0.586691
Acitretin		1.563	1.376	1.021	1.32	0.857	0.61	0.811	0.759333	1.10344	1.0991	1.06953	1.09069	0.959	0.929	0.937	0.941667	0.452825	1.30435	0.668146	0.808439	0.736189	1.02281	0.885831	0.881609	0.777778	1.97222	0.75	1.16667	0.612378	0.605863	0.697068	0.638436	0.964477	0.937959	1.08502	0.99582	0.821472	0.914859	0.975366	0.903899	0.855902	0.440381	0.541221	0.612501	0.573068	0.52792	0.896057	0.665682
Fexofenadine hydrochloride		0.943	1.207	1.437	1.19567	1.115	1.29	1.283	1.22933	1.00097	1.02771	1.13159	1.05342	0.965	0.96	0.974	0.966333	1.01804	1.34073	0.808932	1.0559	1.13808	0.806616	0.889449	0.944714	1.05556	1.77778	1.27778	1.37037	1.23127	1.00977	1.10749	1.11618	1.17629	1.11585	0.961273	1.08447	1.06749	1.08703	0.93923	1.03125	1.24855	0.898629	1.09771	1.08163	0.851931	0.528763	0.610606	0.663767
Minoxidil		1.251	1.351	1.195	1.26567	1.201	1.367	1.061	1.20967	1.09649	1.04661	1.01128	1.05146	0.981	0.986	0.965	0.977333	1.17184	0.823129	0.676427	0.890466	0.921884	0.918137	0.772113	0.870711	1.61111	1.22222	0.888889	1.24074	1.07492	1.21824	0.794788	1.02932	0.907464	0.742721	0.781283	0.810489	1.01413	0.97232	1.03073	1.00573	1.0946	0.461424	0.310287	0.622104	0.645029	0.711696	0.932973	0.763233
Fluoxetine hydrochloride		1.483	1.47	1.53	1.49433	1.021	1.134	0.964	1.03967	1.06707	1.03134	1.00507	1.03449	0.956	0.959	0.932	0.949	0.902987	0.636202	0.792665	0.777285	0.604768	0.674549	0.876785	0.718701	1.47222	1.02778	1.33333	1.27778	0.599349	0.742671	0.820847	0.720955	0.806143	1.06779	0.893321	0.922417	0.98314	0.882399	1.03094	0.965492	0.358913	0.223486	0.293225	0.291875	0.462441	0.565776	0.411987	0.480068
Acyclovir		1.657	1.425	1.088	1.39	0.876	1.129	1.045	1.01667	1.09259	1.04955	0.97202	1.03805	0.961	0.97	0.964	0.965	0.625259	1.11713	0.929311	0.890565	1.14906	0.850036	0.712929	0.904008	1.13889	1.75	1.11111	1.33333	0.977199	0.931596	0.723127	0.877307	1.12856	0.962709	0.986354	1.02587	1.02306	1.01161	1.0343	1.02299	0.801697	0.453663	0.429276	0.561545	0.686594	0.526876	0.790659	0.668043
Felodipine		0.863	1.089	1.039	0.997	1.029	1.061	1.094	1.06133	1.03654	1.03322	1.01281	1.02752	0.978	0.968	0.959	0.968333	1.46406	1.67022	1.33777	1.49068	1.11494	0.961944	1.11055	1.06248	1.38889	2	1.52778	1.63889	1.11401	0.990228	1.17915	1.09446	0.770786	0.897519	1.06624	0.911515	0.985556	0.92757	1.0011	0.97141	1.18864	2.3858	0.906681	1.49371	0.601759	0.173203	0.921486	0.565483
Cortisol 21-acetate		1.706	1.448	1.433	1.529	1.097	1.198	0.788	1.02767	1.18887	1.14521	1.16184	1.16531	0.996	0.979	0.962	0.979	1.05206	0.855072	1.35818	1.08844	1.1687	1.27712	1.73664	1.39415	1.97222	1.36111	2.13889	1.82407	1.2443	1.48534	1.32899	1.35288	0.977073	0.986133	0.94724	0.970149	0.988602	0.963391	1.02232	0.991439	4.1232	4.58707	6.49547	5.06858	2.30832	2.47531	4.10792	2.96385
Hydrochlorothiazide		1.245	1.671	1.415	1.44367	0.77	0.944	0.866	0.86	1.03688	1.12621	1.05189	1.07166	0.934	0.953	0.956	0.947667	0.690328	0.408163	0.964508	0.687666	0.897461	1.11662	1.2558	1.08996	0.944444	0.75	1.5	1.06481	0.67101	1.0228	1.05537	0.916395	0.941937	0.836528	0.959505	0.912657	0.95131	0.969169	1.03346	0.984646	0.652057	0.612008	0.570839	0.611635	0.983491	0.601195	0.657539	0.747408
Orphenadrine hydrochloride		1.358	1.443	1.149	1.31667	0.991	1.263	0.895	1.04967	1.03219	1.05028	0.976208	1.01956	0.954	0.989	0.961	0.968	0.893523	0.945578	1.09938	0.979493	0.90754	0.797312	1.07941	0.928087	1.33333	1.5	1.38889	1.40741	0.872964	0.977199	0.938111	0.929425	1.0205	0.998177	0.855201	0.957958	0.988707	1.04018	0.91717	0.982019	0.475455	0.268649	0.3304	0.358168	0.918087	0.771304	0.850392	0.846595
Lovastatin		1.116	0.891	1.083	1.03	0.929	0.906	1.059	0.964667	1.01092	0.885243	0.876781	0.924313	0.958	0.942	0.978	0.959333	1.06448	1.16267	1.35404	1.19373	1.16353	1.26704	1.34354	1.25804	1.30556	1.13889	1.61111	1.35185	1.04886	1.11401	1.38111	1.18132	0.912657	1.08105	0.98083	0.991511	1.04281	0.992804	1.02673	1.02078	0.589747	0.810551	0.608311	0.669536	0.598796	0.839544	1.04282	0.827053
Priscoline hydrochloride		1.32	1.29	1.13	1.24667	0.956	1.006	0.928	0.963333	0.990995	1.03034	0.968981	0.996773	0.951	0.954	0.971	0.958667	0.535936	0.666075	0.962141	0.721384	0.941138	1.00071	0.694579	0.878809	0.777778	0.944444	1.19444	0.972222	0.872964	0.977199	0.625407	0.82519	0.930446	1.0111	0.931993	0.957848	1.06812	1.0426	1.08483	1.06518	0.88932	1.03557	0.0703599	0.665082	0.765265	0.88324	0.951474	0.86666
Mafenide acetate	30	1.1	1.524	1.554	1.39267	1.198	1.362	1.144	1.23467	1.06636	1.07625	1.1184	1.087	1.027	1.059	1.028	1.038	0.731341	0.848476	0.776693	0.785503	0.978264	0.808302	1.468	1.08485	0.777778	1.25	1.16667	1.06481	1.2093	1.13621	1.73422	1.35991	1.20374	1.0918	0.995864	1.09713	0.937413	0.965592	0.985565	0.962857	0.808463	0.139565	0.293024	0.413684	0.615801	0.679806	0.67138	0.655662
Folic acid		1.302	1.458	1.211	1.32367	1.212	1.433	0.919	1.188	0.996767	1.07584	1.00415	1.02559	1.024	1.047	0.997	1.02267	0.90464	0.847575	1.35215	1.03479	1.21643	1.09179	1.46342	1.25721	1.13889	1.19444	1.58333	1.30556	1.52159	1.61462	1.3887	1.50831	0.841919	0.814524	0.875651	0.844031	1.01898	1.0355	1.02185	1.02544	0.382673	0.48809	0.693058	0.521274	0.849794	0.681436	1.00316	0.844797
Furosemide		1.533	1.216	1.299	1.34933	1.007	1.051	1.476	1.178	1.09357	0.99783	1.00448	1.03196	1.004	1.03	1.048	1.02733	0.974921	1.0398	1.52605	1.18026	1.04156	0.875742	0.911587	0.942965	1.44444	1.22222	1.91667	1.52778	1.08306	0.950166	1.3887	1.14064	0.792609	0.979213	0.901649	0.891157	0.989025	1.04024	1.02492	1.01806	0.378527	0.282164	0.422526	0.361072	0.545907	0.542143	0.503644	0.530565
Methocarbamol		1.483	1.689	1.255	1.47567	1.313	1.58	1.416	1.43633	1.05007	1.03754	0.980356	1.02266	1.024	1.049	1.038	1.037	0.988136	0.986935	0.732542	0.902538	0.789018	0.855586	0.827259	0.823955	1.41667	1.61111	0.888889	1.30556	1.06977	1.39535	1.2093	1.22481	0.964065	1.10652	1.09362	1.05473	0.90172	0.95175	0.968361	0.94061	0.427656	0.31956	0.324892	0.35737	0.469037	0.51839	0.5703	0.519242
Hydrocortisone		1.518	1.362	1.521	1.467	1.268	1.244	1.397	1.303	1.23317	1.14824	1.20918	1.19686	1.039	1.036	1.04	1.03833	1.23021	1.64529	1.43565	1.43705	1.37081	1.42779	1.23005	1.34288	1.80556	2.16667	2.11111	2.02778	1.79402	1.83389	1.77409	1.80066	1.15604	1.04947	1.04141	1.08231	0.922385	1.03579	1.00979	0.989322	3.42272	3.8931	3.61754	3.64445	2.30477	2.03378	2.49028	2.27628
Oxybutynin hydrochloride		1.417	1.116	1.343	1.292	1.348	1.422	1.204	1.32467	1.10809	1.00208	1.07822	1.0628	1	1.034	1.031	1.02167	1.25725	1.41553	1.54017	1.40431	0.826279	0.819306	0.689655	0.778413	1.72222	1.52778	2	1.75	1.1495	1.20266	0.857143	1.06977	0.952248	0.876296	1.07977	0.969437	0.894799	0.926142	1.0876	0.969514	0.506823	0.297086	0.359601	0.387837	0.39386	0.599481	0.534278	0.509206
19-Norethindrone acetate		1.385	1.126	1.631	1.38067	1.105	0.983	1.745	1.27767	1.06096	0.987199	1.13903	1.0624	1.005	0.986	1.057	1.016	1.14071	1.19928	0.968914	1.10297	0.856458	0.864302	0.726589	0.815783	1.52778	1.30556	1.52778	1.4537	0.976744	0.877076	1.30897	1.05426	0.960305	0.961057	0.900682	0.940681	0.929998	0.857821	0.964999	0.917606	0.482097	0.371366	0.198057	0.350507	0.585813	0.417276	0.501589	0.501559
Midodrine hydrochloride		1.49	1.61	1.32	1.47333	1.254	1.957	1.524	1.57833	1.0492	1.04983	1.02752	1.04219	1.017	1.06	1.054	1.04367	0.964409	0.820844	1.06653	0.950593	1.08329	0.759928	0.802637	0.881952	1.38889	1.27778	1.36111	1.34259	1.40199	1.53488	1.26246	1.39978	1.02637	1.03798	1.06741	1.04392	0.942258	0.943642	0.921297	0.935733	0.303859	0.382062	0.187148	0.291023	0.488565	0.188653	0.392353	0.356524
Clopidogrel		1.019	1.092	1.605	1.23867	1.399	1.568	1.547	1.50467	1.02072	1.08921	1.12434	1.07809	1.025	1.056	1.022	1.03433	1.32542	1.44766	0.859288	1.21079	0.971183	0.792613	0.873563	0.87912	1.30556	1.52778	1.33333	1.38889	1.40199	1.28239	1.39535	1.35991	1.0702	0.953752	1.06258	1.02884	0.936524	0.936721	0.984872	0.952706	2.00162	0.636094	0.484687	1.0408	0.319986	0.636295	0.5747	0.510327
Valproic acid		1.328	1.547	1.204	1.35967	1.347	1.373	1.056	1.25867	1.04534	1.16769	0.987124	1.06672	1.037	1.042	1.02	1.033	0.865595	1.17015	1.86064	1.29879	1.0517	0.923898	0.926731	0.967442	1.11111	1.75	2.16667	1.67593	1.46179	1.30897	1.00997	1.26024	0.966966	0.963313	1.04721	0.992498	0.97894	1.0352	1.04617	1.0201	0.460184	0.768662	0.46273	0.563859	0.573556	0.373461	0.849259	0.598759
Phenoxybenzamine hydrochloride		1.843	1.564	1.596	1.66767	0.89	1.29	1.318	1.166	1.17471	1.16125	1.07095	1.13564	0.984	1.003	1.014	1.00033	0.810933	0.936777	1.00826	0.918656	1.17122	1.08253	1.06946	1.10773	1.44444	1.41667	1.55556	1.47222	1.07641	1.44186	1.45515	1.32447	1.04636	1.05699	1.02713	1.04349	1.03846	1.06664	0.986158	1.03042	0.603225	0.877104	0.229949	0.570093	0.563858	0.646723	0.635417	0.615333
Diflunisal		1.419	1.614	1.365	1.466	1.385	1.534	1.417	1.44533	1.08439	1.05621	0.977946	1.03952	1.042	1.059	1.038	1.04633	1.07343	0.498573	0.736747	0.769585	0.832053	0.734216	0.954077	0.840115	1.47222	0.777778	0.972222	1.07407	1.18937	1.16279	1.39535	1.24917	0.936134	0.819681	0.983939	0.913251	0.941072	0.961242	0.951355	0.951223	0.405252	0.630508	0.376152	0.470637	0.37216	0.556767	0.552002	0.493643
Altretamine		1.272	1.011	1.752	1.345	1.46	1.466	1.335	1.42033	1.02562	1.02845	1.11054	1.05487	1.036	1.047	1.045	1.04267	0.767683	1.42063	0.672473	0.953597	0.762761	0.658495	0.795773	0.73901	0.944444	1.38889	1.13889	1.15741	1.1495	0.996678	1.09635	1.08084	0.955793	0.822582	0.933233	0.903869	1.09007	0.920012	0.92278	0.977622	0.562562	0.497561	0.452519	0.504214	0.493098	0.512505	0.736233	0.580612
Nabumetone		1.414	1.529	1.189	1.37733	1.291	1.038	1.159	1.16267	0.996872	1.09631	1.04441	1.04587	1.029	1.001	1.002	1.01067	1.07704	1.05241	1.54648	1.22531	1.27646	1.53162	1.37789	1.39533	1.47222	1.55556	1.77778	1.60185	1.701	1.6412	1.64784	1.66334	0.957405	0.891228	1.02938	0.959338	0.968756	1.00791	0.947499	0.974722	0.631956	0.523821	0.728367	0.628048	1.02068	1.50406	1.1765	1.23375
Penicillin G potassium		1.708	1.279	1.487	1.49133	1.03	1.016	1.327	1.12433	1.10224	1.15129	1.10326	1.11893	1.004	1	1.012	1.00533	1.22841	1.14582	1.48821	1.28748	0.868878	1.12121	0.785858	0.925315	2.02778	1.41667	2.13889	1.86111	0.923588	1.17608	1.07641	1.05869	0.87361	0.938067	1.00585	0.939177	0.97716	1.04627	0.928713	0.984049	0.979046	0.411116	0.421775	0.603979	0.510084	0.564895	0.441153	0.505377
Labetalol hydrochloride		1.33	1.592	1.216	1.37933	1.357	1.466	1.485	1.436	1.12031	1.09691	1.032	1.08307	1.038	1.04	1.045	1.041	1.21009	0.794113	1.29959	1.10127	0.906357	0.777251	0.728115	0.803908	1.55556	1.22222	1.52778	1.43519	1.2691	1.17608	1.11628	1.18715	0.968792	1.04442	1.04474	1.01932	0.942555	0.996144	0.907851	0.94885	0.406346	0.290001	0.403128	0.366492	0.45229	0.345807	0.357956	0.385351
Tropicamide		1.212	1.212	1.643	1.35567	1.346	1.365	1.51	1.407	1.05418	1.14635	1.11886	1.10646	1.026	1.019	1.059	1.03467	0.995645	1.0431	0.892026	0.976923	0.836956	1.02816	0.664923	0.843348	1.16667	1.22222	1.41667	1.26852	1.16279	1.4485	1.03654	1.21595	0.89703	0.961165	0.823011	0.893735	1.01908	0.982796	0.962527	0.988135	0.577044	0.543335	0.529496	0.549958	0.353014	0.403337	0.465634	0.407328
Triamcinolone acetonide		1.61	1.605	1.474	1.563	1.211	1.285	0.835	1.11033	1.1468	1.1761	1.24179	1.18823	1.035	1.052	0.999	1.02867	2.06998	1.48551	2.18291	1.9128	1.88233	1.75323	1.98791	1.87449	3.22222	2.30556	3.11111	2.87963	2.35216	2.32558	1.71429	2.13068	0.973197	0.844604	0.697212	0.838338	0.884022	0.803935	0.945126	0.877694	8.31497	6.00657	8.14022	7.48725	4.64295	3.99932	5.65956	4.76728
Eryped		1.546	1.241	1.59	1.459	1.069	1.191	1.553	1.271	1.161	1.11753	1.21625	1.16492	1.016	1.009	1.04	1.02167	0.985133	0.764079	1.12029	0.9565	0.668192	0.816037	0.721033	0.735087	1.47222	0.916667	1.72222	1.37037	0.737542	1.00332	1.15615	0.96567	0.777891	0.932696	0.835473	0.848687	0.989519	0.953826	0.958078	0.967141	0.539208	0.34332	0.657604	0.513377	0.675379	0.467797	0.470437	0.537871
Pyridostigmine bromide		1.363	1.385	1.09	1.27933	1.084	1.052	1.348	1.16133	1.18422	1.12507	1.04775	1.11902	1.001	1.011	1.031	1.01433	1.07494	1.16144	0.922961	1.05311	1.34183	1.13167	0.850248	1.10792	1.41667	1.55556	0.972222	1.31481	1.50166	1.22924	1.18272	1.30454	0.907235	0.940431	0.85191	0.899859	1.02363	1.00307	0.990607	1.00577	0.245953	0.463956	0.48334	0.39775	0.390637	0.480656	0.553259	0.474851
Nicardipine hydrochloride		0.985	1.214	1.617	1.272	1.042	1.025	0.988	1.01833	0.953644	0.998235	1.13054	1.02747	0.992	1.003	1.019	1.00467	0.99144	1.23082	0.657456	0.959904	1.16185	1.08013	1.37495	1.20564	0.944444	1.44444	1.02778	1.13889	1.24917	1.14286	1.40199	1.26467	0.950744	0.860074	0.899071	0.903296	0.959067	0.999209	0.911805	0.956694	0.461443	0.270316	0.442008	0.391256	0.535359	0.703337	0.622396	0.620364
Loperamide hydrochloride		1.394	1.623	1.604	1.54033	1.533	1.57	1.373	1.492	1.06469	1.12852	1.10717	1.10012	1.024	1.04	0.993	1.019	0.742153	0.460129	0.28653	0.496271	0.764395	0.75034	0.722231	0.745656	1	0.722222	0.444444	0.722222	1.2093	1.21595	1.02326	1.1495	0.971907	0.739432	1.01155	0.907629	0.95442	0.927823	0.932074	0.938106	0.336401	0.26792	0.256758	0.287027	0.456192	0.431336	0.442393	0.443307
Fludarabine		1.584	1.371	1.439	1.46467	0.987	1.139	1.468	1.198	1.13295	1.04386	1.13993	1.10558	1.022	0.984	1.055	1.02033	0.616609	1.15273	0.938579	0.902638	0.932396	1.1138	0.780411	0.942202	0.944444	1.52778	1.30556	1.25926	0.950166	1.30897	1.18272	1.14729	0.839233	0.89198	0.828275	0.853163	0.983093	1.01829	0.928614	0.976666	0.817863	0.438656	0.445263	0.567261	0.913323	0.474408	0.579636	0.655789
Dexamethasone		1.343	1.538	1.286	1.389	1.173	1.274	1.193	1.21333	1.20726	1.22357	1.07622	1.16902	1.051	1.055	1.016	1.04067	1.69004	1.96126	2.16759	1.93963	1.71248	1.76358	1.89944	1.79183	2.19444	2.91667	2.69444	2.60185	2.07309	2.31894	2.33887	2.24363	0.79046	0.851158	0.932266	0.857961	0.811252	0.934843	0.874728	0.873608	7.75783	7.38061	6.31234	7.15026	3.61565	4.57019	4.98017	4.38867
					#DIV/0!	#N/A	#N/A	#N/A	#N/A				#DIV/0!	#N/A	#N/A	#N/A	#N/A				#DIV/0!	#N/A	#N/A	#N/A	#N/A				#DIV/0!	#N/A	#N/A	#N/A	#N/A				#DIV/0!	#N/A	#N/A	#N/A	#N/A				#DIV/0!	#N/A	#N/A	#N/A	#N/A
					#DIV/0!	#N/A	#N/A	#N/A	#N/A				#DIV/0!	#N/A	#N/A	#N/A	#N/A				#DIV/0!	#N/A	#N/A	#N/A	#N/A				#DIV/0!	#N/A	#N/A	#N/A	#N/A				#DIV/0!	#N/A	#N/A	#N/A	#N/A				#DIV/0!	#N/A	#N/A	#N/A	#N/A
					#DIV/0!	#N/A	#N/A	#N/A	#N/A				#DIV/0!	#N/A	#N/A	#N/A	#N/A				#DIV/0!	#N/A	#N/A	#N/A	#N/A				#DIV/0!	#N/A	#N/A	#N/A	#N/A				#DIV/0!	#N/A	#N/A	#N/A	#N/A				#DIV/0!	#N/A	#N/A	#N/A	#N/A
					#DIV/0!	#N/A	#N/A	#N/A	#N/A				#DIV/0!	#N/A	#N/A	#N/A	#N/A				#DIV/0!	#N/A	#N/A	#N/A	#N/A				#DIV/0!	#N/A	#N/A	#N/A	#N/A				#DIV/0!	#N/A	#N/A	#N/A	#N/A				#DIV/0!	#N/A	#N/A	#N/A	#N/A
Epigallocatechin gallate	40	0.763	0.906	0.949	0.872667	0.928	0.965	0.969	0.954	0.994853	1.06049	1.11682	1.05739	1.038	1.042	1.028	1.036	1.17782	0.892608	0.851464	0.973966	0.886917	1.05193	0.770436	0.903095	0.869565	0.782609	0.782609	0.811594	0.880546	1.08532	0.798635	0.921502	1.16305	1.06544	0.907883	1.04546	0.858893	0.846327	0.966333	0.890518				#DIV/0!	0.68663	0.698913	0.548942	0.644829
Pemolide		0.876	1.136	1.148	1.05333	1.178	1.067	1.29	1.17833	1.06679	1.02768	0.985056	1.02651	1.013	0.994	1.013	1.00667	1.02545	0.790795	0.89993	0.905393	0.996603	1.04084	0.999653	1.01236	0.869565	0.869565	1	0.913043	1.25597	1.18771	1.37884	1.27418	1.06826	1.22561	1.0261	1.10666	1.0788	0.985078	1.00414	1.02267				#DIV/0!	0.829157	0.6387	0.621891	0.696583
4-Phenylbutyric acid		1.141	1.125	1.244	1.17	0.921	0.931	0.906	0.919333	1.02952	0.92145	0.957649	0.969538	0.986	0.996	0.991	0.991	1.02336	1.51778	1.87692	1.47269	1.06081	1.09048	0.852111	1.00113	1.13043	1.65217	2.26087	1.68116	1.04437	1.08532	0.825939	0.98521	1.24078	1.2345	1.02422	1.1665	0.975548	1.05995	1.0055	1.01367				#DIV/0!	1.02954	0.682679	0.782956	0.831724
Telmisartan		1.251	1.188	1.159	1.19933	0.83	0.951	1.178	0.986333	0.940871	0.936346	0.911351	0.929523	0.991	0.994	0.986	0.990333	2.08264	1.39923	1.356	1.61262	1.02295	1.06053	0.861541	0.981673	2.52174	1.6087	1.52174	1.88406	0.90785	1.0785	1.08532	1.02389	1.0283	1.03081	1.01888	1.026	0.968951	1.03754	1.01702	1.00784				#DIV/0!	0.966438	0.914399	0.82856	0.903132
Pentoxifylline		1.554	1.189	1.21	1.31767	1.402	1.085	1.462	1.31633	1.02077	0.964903	0.931634	0.972435	1.011	0.993	1.025	1.00967	1.15656	1.1712	1.52232	1.28336	0.72842	1.17659	0.96457	0.956528	1.73913	1.34783	1.78261	1.62319	1.09215	1.36519	1.50853	1.32196	0.848669	0.749699	1.03761	0.878659	1.12278	1.09576	1.06938	1.09597				#DIV/0!	0.913724	0.882499	0.618617	0.804947
Bisoprolol fumarate		1.47	1.494	1.398	1.454	1.221	1.124	1.077	1.14067	0.979469	0.97085	1.00487	0.985061	1.008	1.021	0.991	1.00667	1.03905	0.751395	0.803347	0.864598	0.831034	0.834778	1.007	0.890938	1.47826	1.08696	1.08696	1.21739	1.08532	1.00341	1.16041	1.08305	0.966574	1.04514	0.904535	0.972084	0.933661	0.9878	0.890308	0.937257				#DIV/0!	0.45954	0.527106	0.648769	0.545138
Moclobemide		1.047	1.22	1.101	1.12267	1.124	1.182	1.17	1.15867	0.977084	1.06635	0.930758	0.991396	1.005	1.001	1.009	1.005	1.02929	0.846932	1.50872	1.12831	1.07842	0.97192	0.954309	1.00155	1.04348	1	1.6087	1.21739	1.29693	1.22867	1.19454	1.24005	1.21368	1.04692	0.910394	1.057	0.951254	0.970103	0.961726	0.961028				#DIV/0!	0.484338	0.541461	0.374334	0.466711
Sumatriptan succinate		1.291	1.404	1.484	1.393	1.332	1.122	1.214	1.22267	0.99922	0.943586	1.06363	1.00215	1.021	0.996	1.001	1.006	1.60077	1.75941	0.696304	1.35216	0.997019	1.08632	1.01491	1.03275	2	2.3913	1	1.7971	1.4198	1.30375	1.31741	1.34699	1.00999	0.991264	1.14181	1.04769	0.988952	0.998796	1.03974	1.00916				#DIV/0!	0.55589	0.610876	0.839318	0.668695
Quetiapine fumarate		1.394	1.337	1.554	1.42833	1.261	1.233	1.563	1.35233	1.02226	0.920286	1.00647	0.983007	1.002	0.986	1.022	1.00333	0.741283	0.638075	1.32985	0.903068	0.804964	1.00978	1.00881	0.941182	1	0.826087	2	1.27536	1.08532	1.33106	1.68601	1.36746	1.10791	0.793639	0.692159	0.864571	0.978795	0.947694	0.985182	0.970557				#DIV/0!	0.821137	1.02597	0.595357	0.814155
CGS 15943		1.725	2.192	1.623	1.84667	1.711	1.579	1.434	1.57467	1.03095	1.13094	1.05227	1.07139	1.022	1.014	1.007	1.01433	0.468619	0.450837	0.608787	0.509414	0.742425	0.521528	0.752132	0.672028	0.782609	0.956522	0.956522	0.898551	1.35836	0.880546	1.15358	1.13083	0.968457	1.01784	1.0169	1.00106	0.858788	0.90654	0.927064	0.897464				#DIV/0!	0.506842	0.527734	0.528295	0.520957
Tripelennamine hydrochloride		1.176	1.1	1.655	1.31033	1.036	1.015	1.14	1.06367	1.00851	1.00755	1.10111	1.03906	0.974	0.986	0.992	0.984	0.840307	1.14331	1.08543	1.02301	1.03543	1.29488	1.15371	1.16134	0.956522	1.21739	1.73913	1.30435	1.14676	1.40614	1.40614	1.31968	1.02003	0.754721	1.02453	0.933096	0.912404	1.01314	0.984345	0.969964				#DIV/0!	0.337714	0.553021	0.458468	0.449734
D-Cycloserine		1.467	1.784	1.344	1.53167	1.205	1.157	1.049	1.137	1.03038	1.08073	0.97095	1.02735	1.006	1.002	0.989	0.999	0.826709	2.36646	0.635286	1.27615	1.09644	1.07606	1.14387	1.10546	1.17391		0.826087	1	1.41297	1.33106	1.28328	1.34243	0.934875	0.909243	0.972119	0.938746	0.97691	0.914289	0.94518	0.94546				#DIV/0!	0.596007	0.470619	0.650383	0.572336
Tacrolimus		1.702	1.427	1.48	1.53633	1.103	1.39	1.158	1.217	1.10046	1.08124	0.996405	1.05937	0.999	1.017	1.009	1.00833	0.87099	0.534868	0.97106	0.792306	0.977605	0.812452	1.19046	0.993506	1.43478	0.73913	1.3913	1.18841	1.15358	1.20819	1.4744	1.27873	0.883193	0.964691	0.964691	0.937525	1.02529	0.920886	0.8768	0.940992				#DIV/0!	0.67764	0.681625	0.594011	0.651092
Didanosine		1.666	1.653	1.484	1.601	1.135	1.198	1.185	1.17267	1.01541	1.05803	0.992555	1.022	1.002	1.021	1.009	1.01067	0.728033	1.11437	0.756625	0.866341	1.007	0.88969	0.931568	0.942753	1.17391	1.78261	1.08696	1.34783	1.22184	1.13993	1.18089	1.18089	1.16702	0.956322	0.975362	1.0329	0.977015	0.850725	0.979318	0.935686				#DIV/0!	0.619347	0.43781	0.497178	0.518112
MK 886		1.329	1.551	1.637	1.50567	1.601	1.51	1.617	1.576	1.1024	1.07854	1.12793	1.10296	0.973	0.98	0.988	0.980333	0.912134	1.0136	0.576011	0.833914	0.378701	0.502947	0.41836	0.433336	1.17391	1.52174	0.913043	1.2029	0.648464	0.812287	0.723549	0.7281	1.13543	1.16702	1.01658	1.10635	0.935651	0.868108	0.822661	0.875473				#DIV/0!	0.238572	0.311807	0.184962	0.245114
Linopirdine dihydrochloride		1.252	1.201	1.246	1.233	1.091	1.022	1.049	1.054	0.990156	0.995658	0.99527	0.993694	0.994	0.999	0.989	0.994	1.61437	0.710948	1.22594	1.18375	1.29834	1.22998	0.888303	1.13888	1.95652	0.826087	1.47826	1.42029	1.51536	1.34471	0.996587	1.28555	0.927656	1.017	1.09735	1.014	0.937745	0.93251	1.03335	0.967869				#DIV/0!	0.427166	0.482834	0.571893	0.493964
Clotrimazole		1.153	1.037	1.385	1.19167	1.141	1.276	1.139	1.18533	1.01114	0.811919	0.934033	0.919032	1.008	1.018	1.018	1.01467	1.28556	1.64575	0.940725	1.29068	0.900645	1.05512	1.1318	1.02919	1.43478	1.65217	1.26087	1.44928	1.09898	1.44027	1.37884	1.30603	0.965423	1.09452	0.966156	1.0087	0.917116	0.9434	0.867899	0.909472				#DIV/0!	0.948041	0.686602	0.563019	0.732554
Flecainide hydrochloride		1.769	1.569	1.421	1.58633	1.272	1.373	1.502	1.38233	1.04204	1.006	1.03275	1.02693	1.017	1.025	1.025	1.02233	0.609484	0.887378	0.948396	0.815086	0.867919	0.892186	0.824239	0.861448	1.04348	1.34783	1.30435	1.23188	1.18089	1.31058	1.32423	1.2719	1.02181	0.962808	0.843647	0.942756	0.978481	0.875229	0.949893	0.934534				#DIV/0!	0.427305	0.446164	0.561884	0.478451
Rimcazole dihydrochloride		1.034	1.257	1.386	1.22567	1.148	1.061	1.002	1.07033	0.998186	0.99346	1.05198	1.01454	1.003	1.006	1.004	1.00433	0.998605	1.35739	1.62029	1.32543	0.784026	0.926021	0.87305	0.861032	1	1.65217	2.17391	1.6087	0.962457	1.05119	0.935154	0.982935	0.890307	0.869697	0.745514	0.835173	0.897953	0.949264	0.82842	0.891879				#DIV/0!	0.377291	0.353457	0.350551	0.360433
Spectinomycin		1.408	1.266	1.412	1.362	1.331	1.413	0.958	1.234	1.02511	1.02584	1.05638	1.03577	1.021	1.023	0.992	1.012	1.14854	1.59623	1.08159	1.27545	1.04527	0.975387	0.945712	0.988791	1.56522	1.95652	1.47826	1.66667	1.48805	1.4744	0.969283	1.31058	1.19485	0.975676	0.971177	1.04724	0.929473	0.96581	0.946751	0.947345				#DIV/0!	0.488402	0.378169	0.5518	0.472791
Hexamethylenebisacetamide		1.396	1.378	1.886	1.55333	1.261	1.177	1.175	1.20433	0.973981	1.03908	1.12346	1.04551	1.011	1.017	1.011	1.013	0.771967	0.749651	0.738145	0.753254	0.906191	1.06289	1.04333	1.00414	1.04348	1	1.34783	1.13043	1.22184	1.33788	1.31058	1.2901	0.924308	0.872417	0.904744	0.90049	1.03744	1.00801	0.983507	1.00965				#DIV/0!	1.26208	0.752829	0.694266	0.903057
Pirenperone		1.483	1.922	1.511	1.63867	1.54	1.369	1.419	1.44267	1.02837	1.0581	1.01643	1.0343	1.028	1.015	1.021	1.02133	0.848326	0.397141	0.624128	0.623199	0.725231	0.848645	0.805103	0.792993	1.21739	0.73913	0.913043	0.956522	1.19454	1.24232	1.22184	1.21957	0.744782	0.751164	0.945546	0.813831	0.93963	0.914079	0.976386	0.943365				#DIV/0!	0.658993	0.580636	0.439068	0.559565
Cerivastatin sodium		0.282	0.404	0.461	0.382333	0.534	0.688	0.673	0.631667	0.413228	0.452903	0.513594	0.459908	0.912	0.961	0.946	0.939667	4.61715	4.44177	3.89575	4.31822	2.60376	2.79193	2.45483	2.61684	1.26087	1.73913	1.73913	1.57971	1.48805	2.05461	1.76792	1.77019	1.18429	0.961239	0.889365	1.01163	1.07671	1.02435	0.908634	1.00323				#DIV/0!	0.814211	0.88575	0.741387	0.813783
Argatroban		0.944	1.349	1.367	1.22	1.1	1.188	0.938	1.07533	0.942623	1.07975	1.05603	1.02613	0.999	1.009	0.993	1.00033	1.42713	1.06555	1.08438	1.19235	1.28226	1.28351	1.12321	1.22966	1.30435	1.3913	1.43478	1.37681	1.50853	1.6314	1.12628	1.42207	0.882356	0.749281	1.14798	0.92654	0.988743	0.931777	0.888109	0.93621				#DIV/0!	0.570893	0.489062	0.451948	0.503968
PD 81723		1.524	1.551	1.393	1.48933	1.153	1.377	1.3	1.27667	1.07462	1.12984	1.04313	1.08253	0.997	1.01	1.005	1.004	0.795676	0.839958	1.0645	0.900046	0.824516	0.82521	0.883589	0.844438	1.17391	1.26087	1.43478	1.28986	1.01706	1.21502	1.22867	1.15358	0.825443	0.743108	0.696239	0.75493	0.959841	0.98979	0.95649	0.968707				#DIV/0!	0.72496	0.582391	0.703197	0.670183
Indomethacin hydrate		1.262	1.356	1.408	1.342	1.138	1.362	1.164	1.22133	1.00553	0.949461	1.05139	1.00213	0.998	1.02	1.013	1.01033	0.925035	1.42399	1.4355	1.26151	1.05983	0.819802	1.0199	0.966512	1.13043	1.86957	1.95652	1.65217	1.2901	1.19454	1.26962	1.25142	1.15573	0.999843	0.765078	0.973549	0.862035	0.96738	0.942248	0.923888				#DIV/0!	0.779835	0.424614	0.768398	0.657616
Prochlorperazine maleate		1.052	1.009	1.136	1.06567	1.219	1.161	1.297	1.22567	0.923059	0.990673	0.962533	0.958755	0.999	1.013	1.008	1.00667	0.597629	0.623431	0.632497	0.617852	0.764335	0.890383	0.67434	0.776353	0.608696	0.608696	0.695652	0.637681	0.996587	1.1058	0.935154	1.01251	1.08866	0.821154	0.835591	0.915137	0.984135	0.864024	0.97136	0.93984				#DIV/0!	0.47243	0.407654	0.257268	0.379117
[truncated: 460 more rows]
[truncated: 9 more columns]

## Sheet: 13 uM Discarded Drugs
D1 hAMSCs					D2 hAMSCs
[truncated: 26 more rows]

## Sheet: 1.7 uM
		Hoechst Ratio								Viability Ratio								TE FC								GFP FC								Transgene FC								RLU/mg FC
[truncated: 741 more rows]
[truncated: 9 more columns]

[truncated: 3 more sheets: 1.7 uM Discarded Drugs, 0.2 uM, 0.2 uM Discarded Drugs]
